# Supplementary material for: Identification of pericyte loss and neutrophils infiltration in Focal cortical dysplasia by Integrated Analysis of Single-Cell and Bulk RNA-Sequencing
Source: Research Square preprint supplement (doi:10.21203/rs.3.rs-4253627/v1), 2024-04-30
Supplement: Supplementary file 1 [file 1442ecc94f5cbc689792848b.xlsx]

## Sheet: TableS2-Epilepsy_related_genes
Gene symbol	Description	Band	Phenotypes
SCN1A	sodium channel, voltage-gated, type I, alpha subunit	2q24.3	SMEI;GEFS+;SMEB;Intractable epilepsy;LGS;ICE-GTC;BFNC;SMEB-SW;CGE;PEFS+;CFE;Epilepsy;SMEB-O;Doose syndrome;FS;GEFS2+;EE;EOEE;Epilepsy aphasia, FS+;FS+;MMPSI;SIGEI;SMEB-M;A borderline phenotype of MAE and SIGEI;ADNFLE;Doose or Dravet syndrome;Epilepsy aphasia;EPM2;FE;FS+ and APS;Idiopathic epilepsy;SUDEP;West syndrome;
KCNQ2	potassium voltage-gated channel, KQT-like subfamily, member 2	20q13.3	BFNC;NEE;BNE;EOEE;BIE;Ohtahara syndrome;BNIS;BFIE;West syndrome;BFNS;EE;BECTS and benign neonatal convulsions;BECTS;BECTS without neonatal seizures;BFNC with centrotemporal spikes;BNC;GEFS+;
CDKL5	cyclin-dependent kinase-like 5	Xp22	EE;Encephalopathy with early epilepsy;Early-onset seizure variant of Rett syndrome;EOEE;ISSX;Early EE;Epilepsy;West syndrome;Intractable epilepsy;Early-onset epilepsy;Ohtahara syndrome;Cryptogenic infantile intractable epilepsy;LGS;
PCDH19	protocadherin 19	Xq22.1	EFMR;FE;EE;Early-onset epilepsy;SMEI;SIEE;GTCS;Epilepsy;EIEE;GE;LGS;PDE;
PRRT2	proline-rich transmembrane protein 2	16p11.2	BFIE;ICCA;BIE;IC;BFIE and CAE;Infantile focal epilepsy;
ALDH7A1	aldehyde dehydrogenase 7 family, member A1	5q31	PDE;
NHLRC1	NHL repeat containing 1	6p22.3	EPM2;
EPM2A	epilepsy, progressive myoclonus type 2A, Lafora disease (laforin)	6q24	EPM2;EFMR;SMEI;
LGI1	leucine-rich, glioma inactivated 1	10q24	ADLTE;ADPEAF;ADLTLE;GTCS;IPE with telephone-induced seizures;TLE;
SCN2A	sodium channel, voltage-gated, type II, alpha subunit	2q24.3	BFNIS;West syndrome;BFIE;EOEE;Ohtahara syndrome;EE;Intractable epilepsy;LGS;AERRPS;FS and AFS;GE;Idiopathic epilepsy;IGE;MPSI;Neonatal-onset epilepsy;SMEB;SMEI;
GRIN2A	glutamate receptor, ionotropic, N-methyl D-aspartate 2A	16p13.2	BECTS;CSWS;LKS;ABPE;EOEE;ABPE/CSWS;Atypical BECTS;CSWS, atypical rolandic epilepsy;ADPEAF;Atypical BECTS and absence epilepsy;BECTS/CSWS;Childhood-onset epilepsy;CSWS and BCE;CSWS and IEAD;CSWS, LKS and atypical rolandic epilepsy;ECSWS;
STXBP1	syntaxin binding protein 1	9q34.1	Ohtahara syndrome;West syndrome;EIEE;EE;EOEE;Nonsyndromic EOEE;SMEI;LGS;Nonsyndromic epilepsy;EIEE4;OS or EME;
TRNK	tRNA	-	MERRF;PME;Atypical MERRF;IGE;MERRF/MELAS overlap syndrome;
SLC2A1	solute carrier family 2 (facilitated glucose transporter), member 1	1p34.2	EOAE;IGE;CAE;Epilepsy;JAE;RAE;Seizures of various types;Absence epilepsy;AOAE;BFNC;BMEI;Doose syndrome;EPM2;Intractable epilepsy;
DEPDC5	DEP domain containing 5	22q12.3	FFEVF;BECTS;FE;TLE;ADNFLE;
POLG	polymerase (DNA directed), gamma	15q25	Intractable epilepsy;EPC;CPE;Epilepsy;Prolonged status epilepticus;MSCAE;SMEI;
CACNA1H	calcium channel, voltage-dependent, T type, alpha 1H subunit	16p13.3	CAE;IGE;CAE, FS, TLE, SGE;CAE, IGE, JAE, FS;CAE, JAE;CAE, MAE, FS+;CAE with febrile seizures;Doose syndrome and FS;Doose syndrome;Epilepsy;
CSTB	cystatin B (stefin B)	21q22.3	EPM1;
EFHC1	EF-hand domain (C-terminal) containing 1	6p12.3	JME;JAE;CTLE;IGE;
GABRG2	gamma-aminobutyric acid (GABA) A receptor, gamma 2	5q34	GEFS+;Borderline GEFS+;SMEI;CAE with febrile seizures;FS;IGE;Myoclonic atonic epilepsy;
CHRNA4	cholinergic receptor, nicotinic, alpha 4 (neuronal)	20q13.2-q13.3	ADNFLE;JME;SNFLE;
CLCN2	chloride channel, voltage-sensitive 2	3q27-q28	IGE;Idiopathic epilepsy;CAE;JME;
KCNT1	potassium channel, subfamily T, member 1	9q34.3	MMPSI;ADNFLE;Severe EIEE;Ohtahara syndrome;West syndrome;
KCNQ3	potassium voltage-gated channel, KQT-like subfamily, member 3	8q24	BFNC;BNIS;BECTS without neonatal seizures;BECTS and benign neonatal convulsions;BECTS;BNE;Idiopathic epilepsy;LGS;
SCN1B	sodium channel, voltage-gated, type I, beta subunit	19q13.1	GEFS+;SMEI;Idiopathic epilepsy;PE;
ARX	ubiquitin-like modifier activating enzyme 2	19q12	Ohtahara syndrome;West syndrome;Early-onset epilepsy;EOEE;Epilepsy;Intractable epilepsy;XMESID;
DCX	doublecortin	Xq22.3-q23	Epilepsy;LGS;Resistant partial seizures;West syndrome;
KCNJ10	potassium inwardly-rectifying channel, subfamily J, member 10	1q23.2	EAST syndrome;
PNPO	pyridoxamine 5'-phosphate oxidase	17q21.32	Epilepsy;PDE;NEE;EME;Ohtahara syndrome;West syndrome;
PSEN1	presenilin 1	14q24.3	Early myoclonic epilepsy;GTCS;Epilepsy;Myoclonic epilepsy;
SCARB2	scavenger receptor class B, member 2	4q21.1	Myoclonic epilepsy;PME;
SYNGAP1	synaptic Ras GTPase activating protein 1	6p21.3	GE;EE;MGE;
GABRA1	gamma-aminobutyric acid (GABA) A receptor, alpha 1	5q34	SMEI;IGE;ADJME;CAE;Idiopathic epilepsy;West syndrome;
KCTD7	potassium channel tetramerization domain containing 7	7q11.21	PME;
CACNA1A	calcium channel, voltage-dependent, P/Q type, alpha 1A subunit	19p13	Idiopathic epilepsy;Childhood epilepsy;Absence epilepsy;GE;LGS;
CHRNB2	cholinergic receptor, nicotinic, beta 2 (neuronal)	1q21.3	ADNFLE;Idiopathic epilepsy;
SEZ6	seizure related 6 homolog (mouse)	17q11.2	FS;
SYN1	syntaxin 1A (brain)	7q11.23	Epilepsy;CPE;
GABRB3	gamma-aminobutyric acid (GABA) A receptor, beta 3	15q12	CAE;LGS;West syndrome;
HCN1	hyperpolarization activated cyclic nucleotide-gated potassium channel 1	5p12	EIEE;IGE;
SLC6A8	solute carrier family 6 (neurotransmitter transporter), member 8	Xq28	Epilepsy;Intractable epilepsy;
TRNL1	tRNA	-	MERRF;Epilepsy;Features MERRF and Kearns-Sayre syndrome;Idiopathic epilepsy;MERRF/MELAS overlap syndrome;PME;
CHD2	chromodomain helicase DNA binding protein 2	15q26	SMEI;EE;LGS;
CPA6	cytochrome P450, family 2, subfamily A, polypeptide 6	19q13.2	TLE;
NEDD4L	neural precursor cell expressed, developmentally down-regulated 4-like, E3 ubiquitin protein ligase	18q21	JME;IGE;West syndrome;
ATP6	ATPase, H+/K+ exchanging, alpha polypeptide	19q13.1	Epilepsy;
CYTB	cytochrome b	-	Epilepsy;
GOSR2	golgi SNAP receptor complex member 2	17q21	PME;
PIGA	phosphatidylinositol glycan anchor biosynthesis, class A	Xp22.1	EOEE;West syndrome;EE;Ohtahara syndrome;
SCN8A	sodium channel, voltage gated, type VIII, alpha subunit	12q13	EE;EOEE;IEE and SUDEP;LGS;NEE;West syndrome;
TRNS1	tRNA	-	Myoclonic epilepsy;Atypical MERRF;EPC;Epilepsy;MERRF/MELAS overlap syndrome;
ATP1A2	ATPase, Na+/K+ transporting, alpha 2 polypeptide	1q23.2	Epilepsy;FS;GEFS+;
CASR	calcium-sensing receptor	3q13	IGE;
CLN8	ceroid-lipofuscinosis, neuronal 8 (epilepsy, progressive with mental retardation)	8p23	EPMR;
CNTN2	contactin 2 (axonal)	1q32.1	Epilepsy;
GNAO1	guanine nucleotide binding protein (G protein), alpha activating activity polypeptide O	16q13	Ohtahara syndrome;EE;
GRIN2B	glutamate receptor, ionotropic, N-methyl D-aspartate 2B	12p12	West syndrome;FE;LGS;
ND6	NADH dehydrogenase, subunit 6 (complex I)	-	Epilepsy;Intractable epilepsy;PME;
PRICKLE1	prickle homolog 1 (Drosophila)	12q12	Myoclonic epilepsy;JME;PME;
SCN3A	sodium channel, voltage-gated, type III, alpha subunit	2q24	FE;Cryptogenic pediatric partial epilepsy;
CASK	calcium/calmodulin-dependent serine protein kinase (MAGUK family)	Xp11.4	Early myoclonic epilepsy;Epilepsy;Ohtahara syndrome;West syndrome;
HCN2	hyperpolarization activated cyclic nucleotide-gated potassium channel 2	19p13.3	SUDEP;Febrile seizure syndrome;IGE;
PIGN	phosphatidylinositol glycan anchor biosynthesis, class N	18q21.33	Epilepsy;
PIGO	phosphatidylinositol glycan anchor biosynthesis, class O	9p13.3	EE;
SLC35A2	solute carrier family 35 (UDP-galactose transporter), member A2	Xp11.23-p11.22	EOEE;EE;
ST3GAL3	ST3 beta-galactoside alpha-2,3-sialyltransferase 3	1p34.1	IGE;
TCF4	transcription factor 4	18q21.1	EE;
ACMSD	aminocarboxymuconate semialdehyde decarboxylase	2q21.3	BAFCME;
ALG13	ALG13, UDP-N-acetylglucosaminyltransferase subunit	Xq23	West syndrome;LGS;
ARHGEF9	Cdc42 guanine nucleotide exchange factor (GEF) 9	Xq11.1	Epilepsy;EIEE8;
ASAH1	N-acylsphingosine amidohydrolase (acid ceramidase) 1	8p22	PME;
BCKDK	branched chain ketoacid dehydrogenase kinase	16p11.2	Epilepsy;
CHRNA7	cholinergic receptor, nicotinic, alpha 7 (neuronal)	15q14	JME;
CRH	corticotropin releasing hormone	8q13	ADNFLE;
EEF1A2	eukaryotic translation elongation factor 1 alpha 2	20q13.3	Epilepsy;EE;
FLNA	filamin A, alpha	Xq28	LGS;PE;West syndrome;
GPR56	G protein-coupled receptor 56	16q13	LGS;
ND5	NADH dehydrogenase, subunit 5 (complex I)	-	Epilepsy;MERRF/MELAS overlap syndrome;MTLE-HS;
NIPA2	muscular dystrophy, with rimmed vacuoles	19p13.3	CAE;
PRICKLE2	prickle homolog 2 (Drosophila)	3p14.1	Myoclonic epilepsy;
SLC25A22	solute carrier family 25 (mitochondrial carrier: glutamate), member 22	11p15.5	ARNME;MPSI;Ohtahara syndrome;
SZT2	seizure threshold 2 homolog (mouse)	1p34.2	EOEE;
TBC1D24	TBC1 domain family, member 24	16p13.3	FIME;FE;
TNK2	tyrosine kinase, non-receptor, 2	3q29	Autosomal recessive infantile-onset epilepsy;
TRNF	tRNA	-	Epilepsy;MERRF;
ADRA2B	adrenoceptor alpha 2B	2q11.1	ADCME;
C1QTNF6	C1q and tumor necrosis factor related protein 6	22q13.1	EE;
CACNA2D2	calcium channel, voltage-dependent, alpha 2/delta subunit 2	3p21.3	EE;EIEE;
CACNB4	calcium channel, voltage-dependent, beta 4 subunit	2q22-q23	IGE;JME;
CHRNA2	cholinergic receptor, nicotinic, alpha 2 (neuronal)	8p21	Epilepsy;Idiopathic epilepsy;
COL6A2	collagen, type VI, alpha 2	21q22.3	PME;
COX3	cytochrome c oxidase III	-	Epilepsy;
DNM1	dynamin 1	9q34	EE;
GABRD	gamma-aminobutyric acid (GABA) A receptor, delta	1p36.3	GEFS+;
GMPPB	GDP-mannose pyrophosphorylase B	3p21.31	GE;
GRN	dystroglycan 1 (dystrophin-associated glycoprotein 1)	3p21	GE;
HCN4	hyperpolarization activated cyclic nucleotide-gated potassium channel 4	15q24.1	EE;SUDEP;
HDAC4	histone deacetylase 4	2q37.3	EE;
IER3IP1	immediate early response 3 interacting protein 1	18q12	Epilepsy;
KCND2	potassium voltage-gated channel, Shal-related subfamily, member 2	7q31	Epilepsy;TLE;
KCNH2	potassium voltage-gated channel, subfamily H (eag-related), member 2	7q36.1	Long QT syndrome, epilepsy and sudden death;
KCNV2	potassium channel, subfamily V, member 2	9p24.2	GMAE;Partial febrile and afebrile epilepsy;
KPNA7	karyopherin alpha 6 (importin alpha 7)	1p35.1	West syndrome;
ND1	ALX homeobox 3	1p13.3	LGS;West syndrome;
ND4	core-binding factor, runt domain, alpha subunit 2; translocated to, 3	16q24	Epilepsy;MTLE-HS;
NGLY1	N-glycanase 1	3p24.2	Multifocal epilepsy;
PTEN	phosphatase and tensin homolog	10q23.3	Epilepsy;West syndrome;
RBFOX1	RNA binding protein, fox-1 homolog (C. elegans) 1	16p13.3	BECTS;
SCAF4	SR-related CTD-associated factor 4	21q22.1	EE;
SCN9A	sodium channel, voltage-gated, type IX, alpha subunit	2q24	FS, AFS, TLE;GEFS+;
SERPINI1	serpin peptidase inhibitor, clade I (neuroserpin), member 1	3q26.1	ESES;PME;
SLC35A3	solute carrier family 35 (UDP-N-acetylglucosamine (UDP-GlcNAc) transporter), member A3	1p21	Epilepsy;
SRPX2	sushi-repeat containing protein, X-linked 2	Xq21.33-q23	BECTS;
TK2	BMX non-receptor tyrosine kinase	Xp22.2	EE;
TRNH	tRNA	-	GE;MERRF/MELAS overlap syndrome;
TRNS2	tRNA	-	Absence epilepsy;CPE;
TTN	hematopoietic cell-specific Lyn substrate 1	3q13	EE;
UBE3A	ubiquitin protein ligase E3A	15q11.2	Absence epilepsy;EE;
WWOX	WW domain containing oxidoreductase	16q23.3-q24.1	Epilepsy;
AAK1	AP2 associated kinase 1	2p14	EE;
ABCA2	ATP-binding cassette, sub-family A (ABC1), member 2	9q34	EE;
ABCB9	ATP-binding cassette, sub-family B (MDR/TAP), member 9	12q24	EE;
ABCC8	ATP-binding cassette, sub-family C (CFTR/MRP), member 8	11p15.1	DEND syndrome;
ABL2	c-abl oncogene 2, non-receptor tyrosine kinase	1q25.2	EE;
ACOT4	acyl-CoA thioesterase 4	14q24.3	EE;
ADD3	adducin 3 (gamma)	10q25.2	EE;
AGPAT3	1-acylglycerol-3-phosphate O-acyltransferase 3	21q22.3	EE;
AGTR2	angiotensin II receptor, type 2	Xq22-q23	Epilepsy;
AHCY	adenosylhomocysteinase	20q11.22	EE;
AKAP6	A kinase (PRKA) anchor protein 6	14q12	EE;
AKR1C4	aldo-keto reductase family 1, member C4	10p15.1	EE;
ALMS1	Alstrom syndrome 1	2p13	EE;
ALS2CL	ALS2 C-terminal like	3p21.31	EE;
AMT	aminomethyltransferase	3p21.2-p21.1	EE;
ANK3	ankyrin 3, node of Ranvier (ankyrin G)	10q21	LGS;
ANKRD12	ankyrin repeat domain 12	18p11.22	EE;
ANKRD20A9P	ankyrin repeat domain 20 family, member A9, pseudogene	13q11	EE;
AOX2P	aldehyde oxidase 2 pseudogene	2q33.1	EE;
AP3S2	adaptor-related protein complex 3, sigma 2 subunit	15q26.1	EE;
ARFGEF2	ADP-ribosylation factor guanine nucleotide-exchange factor 2 (brefeldin A-inhibited)	20q13.13	LGS;
ARHGEF15	Rho guanine nucleotide exchange factor (GEF) 15	17p13.1	EE;
ARRDC1	arrestin domain containing 1	9q34.3	EE;
ARSA	arylsulfatase A	22q13.33	MMPSI;
ASH1L	ash1 (absent, small, or homeotic)-like (Drosophila)	1q22	EE;
ASXL1	additional sex combs like 1 (Drosophila)	20q11	EE;
ATAD2B	ATPase family, AAA domain containing 2B	2p24.1-p23.3	EE;
ATIC	5-aminoimidazole-4-carboxamide ribonucleotide formyltransferase/IMP cyclohydrolase	2q35	EE;
ATP2B4	ATPase, Ca++ transporting, plasma membrane 4	1q32.1	EE;
ATP6AP2	ATPase, H+ transporting, lysosomal accessory protein 2	Xp11.4	Epilepsy;
ATP6V0C	ATPase, H+ transporting, lysosomal 16kDa, V0 subunit c	16p13.3	SMEI;
ATP8	ATP synthase F0 subunit 8	-	MTLE-HS;
B3GNT4	UDP-GlcNAc:betaGal beta-1,3-N-acetylglucosaminyltransferase 4	12q24	EE;
BEND3	BEN domain containing 3	6q21	EE;
BEST2	bestrophin 2	19p13.2	EE;
BRAF	v-raf murine sarcoma viral oncogene homolog B	7q34	status epilepticus;
C16orf62	chromosome 16 open reading frame 62	16p12.3	EE;
C17orf53	chromosome 17 open reading frame 53	17q21.31	EE;
C18orf25	chromosome 18 open reading frame 25	18q21.1	EE;
C1orf116	chromosome 1 open reading frame 116	1q32.1	EE;
C1orf123	chromosome 1 open reading frame 123	1p32.3	EE;
C3orf22	chromosome 3 open reading frame 22	3q21.3	EE;
C9orf129	chromosome 9 open reading frame 129	9q22.31	EE;
CACNA1G	calcium channel, voltage-dependent, T type, alpha 1G subunit	17q22	JME;
CAMK2G	calcium/calmodulin-dependent protein kinase II gamma	10q22	EE;
CAMK4	calcium/calmodulin-dependent protein kinase IV	5q21.3	EE;
CANT1	calcium activated nucleotidase 1	17q25.3	EE;
CBL	Cbl proto-oncogene, E3 ubiquitin protein ligase	11q23.3	Severe early-onset epilepsy;
CCDC125	coiled-coil domain containing 125	5q13.2	EE;
CCND1	cyclin D1	11q13	EE;
CD46	CD46 molecule, complement regulatory protein	1q32	West syndrome;
CDC25B	cell division cycle 25B	20p13	EE;
CDS2	guanidinoacetate N-methyltransferase	19p13.3	EE;
CELA3B	chymotrypsin-like elastase family, member 3B	1p36.12	EE;
CELSR1	cadherin, EGF LAG seven-pass G-type receptor 1	22q13.3	EE;
CELSR3	cadherin, EGF LAG seven-pass G-type receptor 3	3p21.31	EE;
CENPW	centromere protein W	6q22.32	EE;
CEP55	centrosomal protein 55kDa	10q23.33	EE;
CHD4	chromodomain helicase DNA binding protein 4	12p13	EE;
CHIA	chitinase, acidic	1p13.2	EE;
CHRFAM7A	CHRNA7 (cholinergic receptor, nicotinic, alpha 7, exons 5-10) and FAM7A (family with sequence similarity 7A, exons A-E) fusion	15q13.1	IGE;
CLCN4	chloride channel, voltage-sensitive 4	Xp22.3	EE;
CLN6	ceroid-lipofuscinosis, neuronal 6, late infantile, variant	15q23	PME;
CLSTN1	calsyntenin 1	1p36.22	SMEI;
CNTN5	contactin 5	11q22.1	West syndrome;
CNTNAP2	contactin associated protein-like 2	7q35	FE;
COL4A4	collagen, type IV, alpha 4	2q35-q37	EE;
COL6A3	collagen, type VI, alpha 3	2q37	SMEI;
COL6A5	collagen, type VI, alpha 5	3q22.1	EE;
COL7A1	collagen, type VII, alpha 1	3p21.1	EE;
COQ2	coenzyme Q2 4-hydroxybenzoate polyprenyltransferase	4q21.23	Early myoclonic epilepsy;
COQ3	coenzyme Q3 methyltransferase	6q16.2	EE;
COX1	cytochrome c oxidase assembly homolog 11 (yeast)	17q22	EPC;
CR2	cholinergic receptor, nicotinic, alpha 3 (neuronal)	15q24	EE;
CREBBP	CREB binding protein	16p13.3	EE;
CRTAC1	cartilage acidic protein 1	10q22	EE;
CSMD2	CUB and Sushi multiple domains 2	1p34.3	EE;
CSNK1E	casein kinase 1, epsilon	22q13.1	EE;
CSNK1G1	casein kinase 1, gamma 1	15q22.1-q22.31	Severe early-onset epilepsy;
CTTNBP2NL	CTTNBP2 N-terminal like	1p13.2	EE;
CUBN	cubilin (intrinsic factor-cobalamin receptor)	10p12.31	EE;
CUL2	cullin 2	10p11.21	EE;
CUX1	cut-like homeobox 1	7q22.1	MMPSI;
CUX2	cut-like homeobox 2	12q24.12	EE;
CYP26C1	cytochrome P450, family 26, subfamily C, polypeptide 1	10q23.33	SMEI;
CYP2U1	cytochrome P450, family 2, subfamily U, polypeptide 1	4q25	EE;
DAO	amine oxidase, copper containing 1	7q36.1	EE;
DDX50	DEAD (Asp-Glu-Ala-Asp) box polypeptide 50	10q22.1	EE;
DDX58	DEAD (Asp-Glu-Ala-Asp) box polypeptide 58	9p12	EE;
DENND6B	DENN/MADD domain containing 6B	22q13.33	EE;
DHDDS	dehydrodolichyl diphosphate synthase	1p36.11	EE;
DHTKD1	dehydrogenase E1 and transketolase domain containing 1	10p14	EE;
DIAPH3	diaphanous-related formin 3	13q21.2	EE;
DIP2C	DIP2 disco-interacting protein 2 homolog C (Drosophila)	10p15.3	EE;
DNAH7	dynein, axonemal, heavy chain 7	2q32.3	EE;
DNAJC6	DnaJ (Hsp40) homolog, subfamily C, member 6	1p31.3	LGS;
DPP7	dipeptidyl-peptidase 7	9q34.3	EE;
DSG2	desmoglein 2	18q12.1	EE;
DTYMK	deoxythymidylate kinase (thymidylate kinase)	2q37.3	EE;
DYRK1A	dual-specificity tyrosine-(Y)-phosphorylation regulated kinase 1A	21q22.13	Epilepsy;
EIF2C4	argonaute RISC catalytic component 4	1p34	West syndrome;
EMILIN3	multimerin 2	10q23.2	EE;
EPHB1	EPH receptor B1	3q21-q23	EE;
EXOSC2	exosome component 2	9q34	EE;
FAM102A	family with sequence similarity 102, member A	9q34.11	EE;
FAM133B	family with sequence similarity 133, member B	7q21.2	EE;
FAM19A2	family with sequence similarity 19 (chemokine (C-C motif)-like), member A2	12q14.1	EE;
FAM21C	family with sequence similarity 21, member C	10q11.1	EE;
FAM227A	family with sequence similarity 227, member A	22q13.1	EE;
FAM50A	family with sequence similarity 50, member A	Xq28	EE;
FAM63B	family with sequence similarity 63, member B	15q21.3	EE;
FAM86C1	family with sequence similarity 86, member C1	11q13.4	EE;
FARP2	FERM, RhoGEF and pleckstrin domain protein 2	2q37.3	SMEI;
FARS2	phenylalanyl-tRNA synthetase 2, mitochondrial	6p25.1	Infantile-onset epilepsy;
FASN	fatty acid synthase	17q25	EE;
FCGR2B	Fc fragment of IgG, low affinity IIb, receptor (CD32)	1q23	EE;
FETUB	fetuin B	3q27	EE;
FIG4	FIG4 homolog, SAC1 lipid phosphatase domain containing (S. cerevisiae)	6q21	Epilepsy;
FLG	fibroblast growth factor receptor 1	8p12	EE;
FLNC	filamin C, gamma	7q32-q35	EE;
FLT4	fms-related tyrosine kinase 4	5q35.3	EE;
FRAT2	frequently rearranged in advanced T-cell lymphomas 2	10q24.1	EE;
GABBR1	gamma-aminobutyric acid (GABA) B receptor, 1	6p21.31	TLE;
GABRA6	gamma-aminobutyric acid (GABA) A receptor, alpha 6	5q34	IGE;
GABRB1	gamma-aminobutyric acid (GABA) A receptor, beta 1	4p12	West syndrome;
GAS2	growth arrest-specific 2	11p14.3	SMEI;
GAS2L2	growth arrest-specific 2 like 2	17q12	SMEI;
GCM2	glial cells missing homolog 2 (Drosophila)	6p23	EE;
GET4	golgi to ER traffic protein 4 homolog (S. cerevisiae)	7p22.3	EE;
GJD2	gap junction protein, delta 2, 36kDa	15q14	JME;
GLB1L3	galactosidase, beta 1-like 3	11q25	EE;
GLIS3	GLIS family zinc finger 3	9p24.2	EE;
GLRA2	glycine receptor, alpha 2	Xp22.2	EE;
GMEB2	glucocorticoid modulatory element binding protein 2	20q13.33	West syndrome;
GPR108	G protein-coupled receptor 108	19p13.3	EE;
GPR128	G protein-coupled receptor 128	3q12.2	EE;
GPR98	G protein-coupled receptor 98	5q13	EE;
GRAMD2	GRAM domain containing 2	15q23	EE;
GRIN1	glutamate receptor, ionotropic, N-methyl D-aspartate 1	9q34.3	West syndrome;
HADHB	hydroxyacyl-CoA dehydrogenase/3-ketoacyl-CoA thiolase/enoyl-CoA hydratase (trifunctional protein), beta subunit	2p23	EE;
HBS1L	HBS1-like (S. cerevisiae)	6q23.3	EE;
HCK	casein kinase 1, delta	17q25	EE;
HEG1	theg spermatid protein	19p13.3	West syndrome;
HFE	hemochromatosis	6p21.3	EE;
HIPK3	homeodomain interacting protein kinase 3	11p13	EE;
HIST1H2BD	histone cluster 1, H2bd	6p21.3	EE;
HNRNPH1	heterogeneous nuclear ribonucleoprotein H1 (H)	5q35.3	LGS;
HNRNPU	heterogeneous nuclear ribonucleoprotein U (scaffold attachment factor A)	1q44	LGS;
HRG	cholinergic receptor, nicotinic, gamma (muscle)	2q37.1	EE;
HSD17B10	hydroxysteroid (17-beta) dehydrogenase 10	Xp11.2	Intractable epilepsy;
HSF2	heat shock transcription factor 2	6q22.31	EE;
HSPG2	heparan sulfate proteoglycan 2	1p36.1-p34	West syndrome;
IFT172	intraflagellar transport 172 homolog (Chlamydomonas)	2p23.3	EE;
IGSF8	immunoglobulin superfamily, member 8	1q23.1	SMEI;
IL27RA	interleukin 27 receptor, alpha	19p13.11	West syndrome;
IPO9	importin 9	1q32.1	EE;
IQSEC1	IQ motif and Sec7 domain 1	3p25.2	LGS;
IQSEC2	IQ motif and Sec7 domain 2	Xp11.22	LGS;
ITGB4	integrin, beta 4	17q25	EE;
ITPR1	inositol 1,4,5-trisphosphate receptor, type 1	3p26.1	EE;
JRK	jerky homolog (mouse)	8q24.3	JME;
KCNA1	potassium voltage-gated channel, shaker-related subfamily, member 1 (episodic ataxia with myokymia)	12p13.32	PE;
KCNB1	potassium voltage-gated channel, Shab-related subfamily, member 1	20q13.2	EE;
KCNH5	potassium voltage-gated channel, subfamily H (eag-related), member 5	14q23.2	EE;
KCNMA1	potassium large conductance calcium-activated channel, subfamily M, alpha member 1	10q22.3	GE;
KIAA1324L	KIAA1324-like	7q21.12	EE;
KIAA1456	KIAA1456	8p22	EE;
KIAA2018	KIAA2018	3q13.2	EE;
KLHL11	kelch-like family member 11	17q21.2	EE;
KMT2A	lysine (K)-specific methyltransferase 2A	11q23	EE;
KMT2B	lysine (K)-specific methyltransferase 2B	19q13.1	EE;
KRT34	keratin 34	17q21.2	EE;
KRTAP1-3	keratin associated protein 1-3	17q21.2	EE;
LAMA2	laminin, alpha 2	6q22-q23	West syndrome;
LCE1A	late cornified envelope 1A	1q21.3	EE;
LDLRAD1	low density lipoprotein receptor class A domain containing 1	1p32.3	EE;
LEMD2	LEM domain containing 2	6p21.31	EE;
LIAS	lipoic acid synthetase	4p14	Neonatal-onset epilepsy;
LILRP2	leukocyte immunoglobulin-like receptor pseudogene 2	19q13.4	EE;
LPHN2	latrophilin 2	1p31.1	EE;
LRRC8D	leucine rich repeat containing 8 family, member D	1p22.2	EE;
MAN2A2	mannosidase, alpha, class 2A, member 2	15q26.1	MMPSI;
MANBA	mannosidase, beta A, lysosomal	4q22-q25	Neonatal-onset epilepsy;
MAPK8IP1	mitogen-activated protein kinase 8 interacting protein 1	11p11.2	EE;
MAPT	microtubule-associated protein tau	17q21.1	MMPSI;
MAST1	microtubule associated serine/threonine kinase 1	19p13.2	EE;
MCM9	minichromosome maintenance complex component 9	6q22.31	MMPSI;
MECP2	methyl CpG binding protein 2 (Rett syndrome)	Xq28	EOEE;
MEF2C	myocyte enhancer factor 2C	5q14.3	EE;
MEOX2	mesenchyme homeobox 2	7p22.1-p21.3	EE;
MIOX	myo-inositol oxygenase	22q13.3	EE;
MKLN1	muskelin 1, intracellular mediator containing kelch motifs	7q32	EE;
MMP27	matrix metallopeptidase 27	11q24	EE;
MRPS23	mitochondrial ribosomal protein S23	17q22-q23	EE;
MRS2	MRS2 magnesium transporter	6p22.3-p22.1	EE;
MSANTD1	Myb/SANT-like DNA-binding domain containing 1	4p16.3	EE;
MTMR11	myotubularin related protein 11	1q12-q21	EE;
MTOR	mechanistic target of rapamycin (serine/threonine kinase)	1p36.2	LGS;
MTRF1	mitochondrial translational release factor 1	13q14.1-q14.3	EE;
MUC7	mucin 7, secreted	4q13.3	EE;
MYH14	myosin, heavy chain 7B, cardiac muscle, beta	20q11.22	MMPSI;
MYH6	myosin, heavy chain 6, cardiac muscle, alpha	14q12	EE;
MYO3A	myosin IIIA	10p11.1	EE;
MYO5A	myosin VA (heavy chain 12, myoxin)	15q21	EE;
MYO7B	myosin VIIB	2q21.1	EE;
MYO9B	myosin IXB	19p13.1	West syndrome;
MYOM3	myomesin 3	1p36.11	EE;
N6AMT1	N-6 adenine-specific DNA methyltransferase 1 (putative)	21q21.3	EE;
NBEA	neurobeachin	13q13	EE;
NBPF9	neuroblastoma breakpoint family, member 9	1q21.1	EE;
NCOR2	nuclear receptor corepressor 2	12q24	EE;
ND3	potassium voltage-gated channel, Shal-related subfamily, member 3	1p13.3	EE;
NECAP1	NECAP endocytosis associated 1	12p13.31	SIEE;
NFASC	neurofascin	1q32.1	EE;
NFE2L1	nuclear factor (erythroid-derived 2)-like 1	17q21.3	EE;
NIPA1	non imprinted in Prader-Willi/Angelman syndrome 1	15q11.2	EE;
NKAIN3	Na+/K+ transporting ATPase interacting 3	8q12.3	SMEI;
NLGN2	neuroligin 2	17p13.1	EE;
NLRP5	NLR family, pyrin domain containing 5	19q13.43	EE;
NLRP8	NLR family, pyrin domain containing 8	19q13.43	EE;
NOL11	nucleolar protein 11	17q24.2	SMEI;
NOTUM	notum pectinacetylesterase homolog (Drosophila)	17q25.3	EE;
NPC1L1	NPC1-like 1	7p13	West syndrome;
NR1H2	nuclear receptor subfamily 1, group H, member 2	19q13.3	EE;
NR2F1	nuclear receptor subfamily 2, group F, member 1	5q14	West syndrome;
NRARP	NOTCH-regulated ankyrin repeat protein	9q34.3	EE;
NTSR2	neurotensin receptor 2	2p25.1	EE;
OPRM1	opioid receptor, mu 1	6q24-q25	IAE;
OR10H2	olfactory receptor, family 10, subfamily H, member 2	19p13.1	EE;
OR10S1	olfactory receptor, family 10, subfamily S, member 1	11q24.1	EE;
OSBPL5	oxysterol binding protein-like 5	11p15.4	EE;
PACS2	phosphofurin acidic cluster sorting protein 2	14q32.33	EE;
PAK6	p21 protein (Cdc42/Rac)-activated kinase 2	3q29	EE;
PALLD	palladin, cytoskeletal associated protein	4q32.3	EE;
PAQR8	progestin and adipoQ receptor family member VIII	6p12.1	EE;
PASK	PAS domain containing serine/threonine kinase	2q37.3	EE;
PCDH12	protocadherin 12	5q31	MMPSI;
PCDHB13	protocadherin beta 13	5q31	EE;
PDCL2	phosducin-like 2	4q12	EE;
PDIK1L	PDLIM1 interacting kinase 1 like	1p36.11	EE;
PIGQ	phosphatidylinositol glycan anchor biosynthesis, class Q	16p13.3	Ohtahara syndrome;
PIK3AP1	phosphoinositide-3-kinase adaptor protein 1	10q24.1	EE;
PLA1A	phospholipase A1 member A	3q13.13-q13.2	EE;
PLCG2	phospholipase C, gamma 2 (phosphatidylinositol-specific)	16q24.1	EE;
PLXNA1	plexin A1	3q21.3	EE;
PLXNB2	plexin B2	22q13.33	MMPSI;
PNKP	polynucleotide kinase 3'-phosphatase	19q13.3-q13.4	EE;
PNMAL1	paraneoplastic Ma antigen family-like 1	19q13.32	EE;
PPP1R3B	protein phosphatase 1, regulatory subunit 3B	8p23.1	EE;
PPP1R3C	protein phosphatase 1, regulatory subunit 3C	10q23-q24	EPM2;
PPP6R1	protein phosphatase 6, regulatory subunit 1	19q13.42	EE;
PRDM12	PR domain containing 12	9q33-q34	EE;
PRDM4	PR domain containing 4	12q23-q24.1	EE;
PRKX	protein kinase, X-linked	Xp22.3	EE;
PRR19	proline rich 19	19q13.2	EE;
PRRC2B	proline-rich coiled-coil 2B	9q34.13	West syndrome;
PRSS30P	protease, serine, 30, pseudogene	16p13.3	EE;
PSEN2	presenilin 2 (Alzheimer disease 4)	1q31-q42	Generalized epilepsy;
PTK2B	protein tyrosine kinase 2 beta	8p21.1	EE;
PTPRR	protein tyrosine phosphatase, receptor type, R	12q15	EE;
PWWP2A	PWWP domain containing 2A	5q33.3	EE;
QRSL1	glutaminyl-tRNA synthase (glutamine-hydrolyzing)-like 1	6q21	EE;
RAB5C	RAB5C, member RAS oncogene family	17q21.2	EE;
RALGAPB	Ral GTPase activating protein, beta subunit (non-catalytic)	20q11.23	EE;
RALGPS1	Ral GEF with PH domain and SH3 binding motif 1	9q33.3	EE;
RANBP17	RAN binding protein 17	5q34	EE;
RANGAP1	Ran GTPase activating protein 1	22q13	EE;
RAPGEF6	Rap guanine nucleotide exchange factor (GEF) 6	5q31.1	EE;
RARS	arginyl-tRNA synthetase	5q35.1	EE;
RASIP1	Ras interacting protein 1	19q13.33	EE;
RBFOX3	RNA binding protein, fox-1 homolog (C. elegans) 3	17q25.3	BECTS;
RD3	ATP-binding cassette, sub-family A (ABC1), member 4	1p22	EE;
RFX3	regulatory factor X, 3 (influences HLA class II expression)	9p24.2	EE;
RGS14	regulator of G-protein signaling 16	1q25-q31	EE;
RHOG	ras homolog family member G	11p15.5-p15.4	EE;
RIOK3	RIO kinase 3	18q11.2	EE;
RMND1	required for meiotic nuclear division 1 homolog (S. cerevisiae)	6q25.1	Intractable epilepsy;
RP1L1	retinitis pigmentosa 1-like 1	8p23.1	EE;
RRP1B	ribosomal RNA processing 1B	21q22.3	EE;
RTKN2	rhotekin 2	10q21.2	EE;
RTP1	poly (ADP-ribose) polymerase family, member 1 pseudogene 1	13q34	EE;
RUVBL2	RuvB-like 2 (E. coli)	19q13.3	EE;
RXFP1	relaxin/insulin-like family peptide receptor 1	4q32.1	EE;
RYR2	ryanodine receptor 2 (cardiac)	1q43	EE;
SAFB2	scaffold attachment factor B2	19p13.3	EE;
SCN5A	sodium channel, voltage-gated, type V, alpha subunit	3p21	Epilepsy;
SDCBP2	syndecan binding protein (syntenin) 2	20p13	EE;
SEMA5B	sema domain, seven thrombospondin repeats (type 1 and type 1-like), transmembrane domain (TM) and short cytoplasmic domain, (semaphorin) 5B	3q21.1	West syndrome;
SGCE	sarcoglycan, epsilon	7q21.3	Epilepsy;
SGK223	homolog of rat pragma of Rnd2	8p23.1	EE;
SKA3	spindle and kinetochore associated complex subunit 3	13q12.11	EE;
SLAMF1	signaling lymphocytic activation molecule family member 1	1q23.3	EE;
SLC16A3	solute carrier family 16 (monocarboxylate transporter), member 3	17q25	EE;
SLC1A2	solute carrier family 1 (glial high affinity glutamate transporter), member 2	11p13-p12	EE;
SLC25A12	solute carrier family 25 (aspartate/glutamate carrier), member 12	2q24	Infantile epilepsy;
SLC26A11	solute carrier family 26 (anion exchanger), member 11	17q25.3	EE;
SLC26A8	solute carrier family 26 (anion exchanger), member 8	6p21	EE;
SLC4A3	solute carrier family 4 (anion exchanger), member 3	2q36	IGE;
SLC5A10	solute carrier family 5 (sodium/sugar cotransporter), member 10	17p11.2	EE;
SLC5A12	solute carrier family 5 (sodium/monocarboxylate cotransporter), member 12	11p14.2	EE;
SLC8A1	solute carrier family 8 (sodium/calcium exchanger), member 1	2p22.1	SMEI;
SLC9A6	solute carrier family 9, subfamily A (NHE6, cation proton antiporter 6), member 6	Xq26.3	ESES;
SLCO1A2	solute carrier organic anion transporter family, member 1A2	12p12	EE;
SLCO1B7	solute carrier organic anion transporter family, member 1B7 (non-functional)	12p12.2	EE;
SMG9	SMG9 nonsense mediated mRNA decay factor	19q13.31	EE;
SMS	spermine synthase	Xp22.1	GE;
SMURF1	SMAD specific E3 ubiquitin protein ligase 1	7q22.1	EE;
SNAPC3	small nuclear RNA activating complex, polypeptide 3, 50kDa	9p22.3	EE;
SNIP1	Smad nuclear interacting protein 1	1p34.3	Symptomatic epilepsy;
SNX30	sorting nexin 33	15q24.2	EE;
SPG7	spastic paraplegia 7 (pure and complicated autosomal recessive)	16q24.3	EE;
SPTAN1	spectrin, alpha, non-erythrocytic 1	9q34.11	MGE;
SQSTM1	sequestosome 1	5q35	West syndrome;
SS18L1	synovial sarcoma translocation gene on chromosome 18-like 1	20q13.3	EE;
ST3GAL5	ST3 beta-galactoside alpha-2,3-sialyltransferase 5	2p11.2	Amish infantile epilepsy syndrome;
STK36	serine/threonine kinase 36	2q35	EE;
STPG2	sperm-tail PG-rich repeat containing 2	4q22.3-q23	EE;
STX1B	syntaxin 1B	16p11.2	EE;
SULT1C4	sulfotransferase family, cytosolic, 1C, member 4	2q12.3	EE;
SVIL	supervillin	10p11.2	West syndrome;
SVOPL	SVOP-like	7q34	EE;
SYTL5	synaptotagmin-like 5	Xp21.1	EE;
TAAR2	trace amine associated receptor 2	6q24	EE;
TAF1	TAF1 RNA polymerase II, TATA box binding protein (TBP)-associated factor, 250kDa	Xq13.1	EE;
TCEB3B	transcription elongation factor B polypeptide 3B (elongin A2)	18q21.1	EE;
TENM2	teneurin transmembrane protein 2	5q34	West syndrome;
TEX15	testis expressed 15	8p12	EE;
THAP1	protein-kinase, interferon-inducible double stranded RNA dependent inhibitor, repressor of (P58 repressor)	11q13.5	EE;
THAP4	THAP domain containing 4	2q37.3	EE;
THOC2	THO complex 2	Xq25-q26.3	EE;
TIFA	TRAF-interacting protein with forkhead-associated domain	4q25	EE;
TMPRSS5	transmembrane protease, serine 5	11q	EE;
TNFAIP6	tumor necrosis factor, alpha-induced protein 6	2q23.3	West syndrome;
TNKS2	tankyrase, TRF1-interacting ankyrin-related ADP-ribose polymerase 2	10q23.3	EE;
TNNI3K	TNNI3 interacting kinase	1p31.1	EE;
TPTE2	transmembrane phosphoinositide 3-phosphatase and tensin homolog 2	13q12.11	EE;
TRIM29	tripartite motif containing 29	11q23.3	EE;
TRIM32	tripartite motif containing 32	9q33.1	EE;
TRIM8	tripartite motif containing 8	10q24.3	EE;
TRIO	trio Rho guanine nucleotide exchange factor	5p15.2	EE;
TRMT44	tRNA methyltransferase 44 homolog (S. cerevisiae)	4p16.1	PE;
TRMT61A	tRNA methyltransferase 61 homolog A (S. cerevisiae)	14q32	EE;
TRNC	tRNA	-	TLE;
TRND	tRNA	-	Myoclonic epilepsy;
TRNI	tRNA	-	PME;
TRNP	tRNA	-	MERRF;
TRNR	GDNF family receptor alpha 1	10q26.11	MERRF;
TRNT	tRNA	-	MERRF;
TRNW	tRNA	-	MERRF/MELAS overlap syndrome;
TRRAP	transformation/transcription domain-associated protein	7q21.2-q22.1	EE;
TSNAXIP1	translin-associated factor X interacting protein 1	16q22.1	EE;
TSPYL4	TSPY-like 4	6q22.1	SMEI;
TTYH1	tweety homolog 1 (Drosophila)	19q13.4	EE;
UBR5	ubiquitin protein ligase E3 component n-recognin 5	8q22	FAME;
UNC5CL	unc-5 homolog C (C. elegans)-like	6p21.1	EE;
USP31	ubiquitin specific peptidase 31	16p12.2	EE;
USP42	ubiquitin specific peptidase 42	7p22.1	EE;
VAMP7	vesicle-associated membrane protein 7	Xq28 and Yq12	EE;
VPS37A	vacuolar protein sorting 37 homolog A (S. cerevisiae)	8p22	EE;
WDFY2	WD repeat and FYVE domain containing 2	13q14.3	EE;
WDR19	WD repeat domain 19	4p14	EE;
WDR45	WD repeat domain 45	Xp11.23	EE;
WDR62	WD repeat domain 62	19q13.12	Familial microcephaly epilepsy syndrome;
WDR82	WD repeat domain 82	3p21.2	EE;
WHSC1L1	Wolf-Hirschhorn syndrome candidate 1-like 1	8p11.2	EE;
WNK1	WNK lysine deficient protein kinase 1	12p13.3	EE;
XPO1	exportin 1 (CRM1 homolog, yeast)	2p15	EE;
YWHAG	tyrosine 3-monooxygenase/tryptophan 5-monooxygenase activation protein, gamma polypeptide	7q11.23	EE;
ZBTB40	zinc finger and BTB domain containing 40	1p36	EE;
ZC3HAV1	zinc finger CCCH-type, antiviral 1	7q34	EE;
ZFHX3	zinc finger homeobox 3	16q22.3	EE;
ZMYND8	zinc finger, MYND-type containing 8	20q13.12	EE;
ZNF12	zinc finger protein 12	7p22.1	EE;
ZNF182	zinc finger protein 182	Xp11.23	EE;
ZNF467	zinc finger protein 467	7q36.1	EE;
ZNF83	zinc finger protein 83	19q13.3	EE;
ZNF839	zinc finger protein 839	14q32.31	EE;
ZSCAN2	paternally expressed 3	19q13.4	EE;
ZSCAN21	zinc finger and SCAN domain containing 21	7q22.1	EE;
ZSWIM8	zinc finger, SWIM-type containing 8	10q22.2	EE;
