# Supplementary material for: Identification of pericyte loss and neutrophils infiltration in Focal cortical dysplasia by Integrated Analysis of Single-Cell and Bulk RNA-Sequencing
Source: Research Square preprint supplement (doi:10.21203/rs.3.rs-4253627/v1), 2024-04-30
Supplement: Supplementary file 2 [file 22e98946373ee1bd3ebdf843.xlsx]

## Sheet: GO
ONTOLOGY	ID	Description	setSize	enrichmentScore	NES	pvalue	p.adjust	qvalue	rank	leading_edge	core_enrichment
CC	GO:0043204	perikaryon	117	0.549593	2.2757	9.25256e-10	7.3928e-07	6.65535e-07	2835	tags=39%, list=15%, signal=34%	NGB/PCSK1/ADCYAP1/HPCA/NPPA/SLC8A2/PENK/SERPINI1/MAP1B/PTPRN/KCNA1/OLFM1/KCNB1/KCNK1/RTN4RL1/SCN1B/CRMP1/DDN/EPHA4/CRHBP/NPY/RGS7BP/CDK5R1/KCNB2/TIAM2/PI4K2A/RTN4RL2/PDE9A/SLC1A1/PRPH/KCND2/RCVRN/SORCS2/DHX36/DBNL/ASTN2/RNF112/DRP2/CDK5/NDN/AIF1/PPP1CA/DIP2B/ELAVL4/SLC8A3/ENDOG
MF	GO:0005184	neuropeptide hormone activity	16	0.828532	2.27048	3.80206e-07	9.76449e-05	8.79047e-05	953	tags=62%, list=5%, signal=59%	CORT/CARTPT/ADCYAP1/NPPA/PENK/CRH/PNOC/VGF/NPY/GRP
BP	GO:0033280	response to vitamin D	25	0.713791	2.20646	7.81033e-06	0.00120884	0.00108826	1839	tags=52%, list=9%, signal=47%	SPP1/PENK/ALPL/MED1/CXCL10/PTGS2/ATP2B1/TRIM25/STC1/FGF23/MN1/CDKN2D/PIM1
CC	GO:0008076	voltage-gated potassium channel complex	62	0.577945	2.19707	2.62561e-06	0.000509096	0.000458313	2091	tags=34%, list=11%, signal=30%	KCNH4/KCNG1/KCNF1/KCNV1/KCNA1/KCNB1/KCNK1/CALM2/KCNS1/KCNIP3/KCNB2/CALM3/LRRC38/KCNQ3/KCNJ16/KCNIP1/KCNMB4/KCND2/HCN1/KCND1/KCNS2
BP	GO:0033273	response to vitamin	57	0.59089	2.193	2.76105e-06	0.000509096	0.000458313	1839	tags=35%, list=9%, signal=32%	SPP1/CYP26B1/PENK/ALPL/CYP26A1/FKBP1B/MAP1B/RARA/MED1/CXCL10/PTGS2/FOLR2/ATP2B1/TRIM25/STC1/FGF23/MN1/OGG1/CDKN2D/PIM1
BP	GO:0007584	response to nutrient	106	0.535464	2.18999	2.32839e-08	1.28796e-05	1.15948e-05	1839	tags=31%, list=9%, signal=28%	SPP1/IGFBP2/CYP26B1/PENK/ALPL/CYP26A1/FKBP1B/MAP1B/RARA/ENSA/TFRC/MED1/USF1/PPARG/LPL/SST/CXCL10/PTGS2/FOLR2/ATP2B1/TRIM25/CYBB/STC1/FGF23/MN1/CDKN2B/VCAM1/POR/OGG1/STAT1/CDKN2D/ERCC1/PIM1
MF	GO:0019825	oxygen binding	21	0.718865	2.13608	7.54087e-05	0.0065333	0.00588159	1017	tags=33%, list=5%, signal=32%	HBG1/HBG2/NGB/HBA1/HBA2/CYP26A1/HBQ1
BP	GO:0098883	synapse pruning	11	0.861684	2.12086	1.77143e-05	0.00219627	0.00197718	790	tags=55%, list=4%, signal=52%	CX3CL1/C1QA/C1QB/C1QC/TREM2/EPHA4
CC	GO:0000315	organellar large ribosomal subunit	53	0.572357	2.11273	2.01498e-05	0.00241495	0.00217405	4893	tags=60%, list=25%, signal=45%	MRPL3/MRPL45/MRPL18/MRPL19/MRPL33/MRPL1/MRPL39/MRPL54/MRPS30/MRPL4/MRPL36/MRPL40/MRPL14/MRPL2/MRPL21/MRPL28/MRPL15/MPV17L2/MRPL9/MRPL12/MRPL47/GADD45GIP1/MRPL37/MRPL50/MRPL46/MRPL13/NSUN3/MRPL51/MRPL44/MRPL49/MRPL55/MRPL22
CC	GO:0005762	mitochondrial large ribosomal subunit	53	0.572357	2.11273	2.01498e-05	0.00241495	0.00217405	4893	tags=60%, list=25%, signal=45%	MRPL3/MRPL45/MRPL18/MRPL19/MRPL33/MRPL1/MRPL39/MRPL54/MRPS30/MRPL4/MRPL36/MRPL40/MRPL14/MRPL2/MRPL21/MRPL28/MRPL15/MPV17L2/MRPL9/MRPL12/MRPL47/GADD45GIP1/MRPL37/MRPL50/MRPL46/MRPL13/NSUN3/MRPL51/MRPL44/MRPL49/MRPL55/MRPL22
CC	GO:0099061	integral component of postsynaptic density membrane	39	0.605609	2.1094	5.04121e-05	0.00507329	0.00456722	3366	tags=51%, list=17%, signal=42%	ATP2B2/ADCY1/GRIN2A/ADRA2A/LRRTM3/LRRC4C/NPTN/CACNG3/SLITRK3/LRFN4/SLC16A3/CHRM1/LRFN2/EFNB2/GSG1L/CNIH2/LRFN5/GRIN3A/SLITRK1/LRFN3
BP	GO:0042744	hydrogen peroxide catabolic process	21	0.703778	2.09125	0.000149248	0.0106262	0.0095662	3535	tags=67%, list=18%, signal=55%	HBG1/HBG2/HBA1/HBA2/SNCA/HBQ1/TPO/PXDNL/PRDX4/PRDX5/HBB/PRDX3/HBD/PXDN
CC	GO:0032590	dendrite membrane	26	0.666565	2.07499	0.000157033	0.0109633	0.0098697	1697	tags=38%, list=9%, signal=35%	ATP2B2/HPCA/KCNB1/DDN/GABRA1/ATP2B1/THY1/PPP1R9B/ATP6AP2/GABRA5
CC	GO:0099146	intrinsic component of postsynaptic density membrane	41	0.591343	2.07439	4.04985e-05	0.00422065	0.00379963	3366	tags=51%, list=17%, signal=42%	ATP2B2/ADCY1/GRIN2A/ADRA2A/LRRTM3/LRRC4C/NPTN/CACNG3/RGS7BP/SLITRK3/LRFN4/SLC16A3/CHRM1/LRFN2/EFNB2/GSG1L/CNIH2/LRFN5/GRIN3A/SLITRK1/LRFN3
BP	GO:0099601	regulation of neurotransmitter receptor activity	50	0.559756	2.05785	5.07964e-05	0.00507329	0.00456722	2779	tags=44%, list=14%, signal=38%	ARC/RASGRF1/DLGAP4/CRH/NETO2/NPTXR/CNIH3/NPTX2/HOMER1/NLGN1/EPHB2/CRHBP/CACNG3/MEF2C/RASGRF2/BEGAIN/GSG1L/DLGAP2/PRRT1/DLGAP1/CNIH2/IFNGR2
CC	GO:0032809	neuronal cell body membrane	21	0.692487	2.0577	0.000253465	0.0145813	0.0131268	2104	tags=52%, list=11%, signal=47%	ATP2B2/HPCA/ATP1A3/KCNB1/ATP2B1/KCNB2/THY1/CADM2/KCND2/GABRA5/FLRT1
MF	GO:0004629	phospholipase C activity	21	0.692389	2.0574	0.000258115	0.014731	0.0132616	1724	tags=33%, list=9%, signal=30%	PLCB1/GDPD5/PLCL2/EDNRA/CHRM1/PLCB4/CCL5
CC	GO:0099240	intrinsic component of synaptic membrane	120	0.495764	2.05586	1.32431e-07	3.96797e-05	3.57216e-05	1835	tags=32%, list=9%, signal=29%	ATP2B2/ADCY1/GRIN2A/NTNG1/ATP1A3/ADRA2A/SLC1A6/KCNA1/STX1A/CPLX3/LRRTM3/LRRC4C/GABRD/NLGN1/GRM2/EPHB2/EPHA4/GRM3/NPTN/NLGN4Y/CSPG5/PSENEN/CACNG3/RGS7BP/SLITRK3/ATP2B1/CNTN1/LRFN4/SLC16A3/CHRM1/CNTN2/LRFN2/ADAM23/KCND2/GABRA5/EFNB2/GSG1L/PCDH8
MF	GO:0004435	phosphatidylinositol phospholipase C activity	20	0.697611	2.04629	0.000300242	0.016608	0.0149513	1724	tags=35%, list=9%, signal=32%	PLCB1/GDPD5/PLCL2/EDNRA/CHRM1/PLCB4/CCL5
CC	GO:0098982	GABA-ergic synapse	59	0.542896	2.03974	4.00602e-05	0.00422065	0.00379963	1830	tags=34%, list=9%, signal=31%	ATP2B2/PLCB1/SLC32A1/NRG1/ADRA2A/GLRB/SLC6A17/MDGA1/GABRD/NLGN1/GABRA1/NPTN/NLGN4Y/CSPG5/SLITRK3/ATP2B1/LRFN4/KCND2/GABRA5/FLOT1
CC	GO:0044298	cell body membrane	24	0.660931	2.02818	0.000164526	0.0111614	0.010048	2104	tags=46%, list=11%, signal=41%	ATP2B2/HPCA/ATP1A3/KCNB1/ATP2B1/KCNB2/THY1/CADM2/KCND2/GABRA5/FLRT1
CC	GO:0098978	glutamatergic synapse	278	0.43665	2.0271	1e-10	1.4382e-07	1.29474e-07	3007	tags=32%, list=15%, signal=27%	TNNI3K/ATP2B2/CBLN2/ADCY1/ARC/HPCA/GRIN2A/MAL2/PLCB1/DLGAP4/NRGN/NTNG1/CDH8/NRG1/ADRA2A/SLC1A6/NPTXR/KCNA1/CADPS2/DLG1/CBLN1/NPTX2/STX1A/SLC6A17/LRRTM3/LRRC4C/HOMER1/NLGN1/HOMER2/SLITRK4/DLG3/EPHB2/PPP3CA/EPHA4/GRM3/ARPC5L/NPTN/NLGN4Y/CSPG5/HIP1/CACNG3/RGS7BP/ATP2B1/CAMK4/LRFN4/HSPA8/CAMK1/EPHB1/LYN/SLC30A3/ADAM10/CHRM1/ARPC2/ADAM23/KCND2/RGS14/EFNB2/PRKAR1B/GSG1L/CLSTN1/FLOT1/PCDH8/NAPA/SH3GL3/D…
MF	GO:0005005	transmembrane-ephrin receptor activity	12	0.803267	2.02469	0.000240783	0.014077	0.0126728	1738	tags=58%, list=9%, signal=53%	EPHB6/EPHA8/EPHB2/EPHA5/EPHA4/EPHB1/EPHB3
BP	GO:0050807	regulation of synapse organization	162	0.463599	2.02263	3.03405e-08	1.55842e-05	1.40296e-05	3408	tags=40%, list=18%, signal=33%	TNNI3K/CBLN2/ARC/CUX2/NGEF/SNCA/CDH8/ST8SIA2/CBLN1/SLITRK5/TUBA1A/STAU2/AGRN/LRRTM3/MDGA1/HOMER1/NLGN1/TREM2/SLITRK4/EPHB2/NRXN1/ZNF804A/FRMPD4/LRRN3/EPHA4/SLITRK3/CDK5R1/LRFN4/HSPA8/CAMK1/EPHB1/CAMK2B/MEF2C/TUBB/LRFN2/C1QL3/TPBG/ACTR2/BDNF/EPHB3/NEUROD2/CLSTN1/PCDH8/IL10RA/ITPKA/DHX36/DBNL/CDK5/LHFPL4/TANC2/CAMKV/SETD5/GPC6/GHRL/UBE3A/ARF4/LRFN5/PTEN/LRTM2/YWHAZ/SLITRK1/CTNNA2/LRFN3/ABI3
BP	GO:0051965	positive regulation of synapse assembly	46	0.56029	2.01989	0.000100109	0.00808855	0.0072817	1799	tags=41%, list=9%, signal=38%	CBLN2/CUX2/ST8SIA2/CBLN1/SLITRK5/STAU2/AGRN/LRRTM3/NLGN1/SLITRK4/EPHB2/NRXN1/LRRN3/SLITRK3/EPHB1/TPBG/BDNF/EPHB3/CLSTN1
CC	GO:0099060	integral component of postsynaptic specialization membrane	57	0.54242	2.01311	7.94685e-05	0.00680307	0.00612445	3366	tags=44%, list=17%, signal=36%	ATP2B2/ADCY1/GRIN2A/ADRA2A/LRRTM3/LRRC4C/NLGN1/NPTN/NLGN4Y/CACNG3/SLITRK3/LRFN4/SLC16A3/CHRM1/LRFN2/KCND2/GABRA5/EFNB2/GSG1L/CNIH2/NLGN4X/LRFN5/GRIN3A/SLITRK1/LRFN3
BP	GO:0090200	positive regulation of release of cytochrome c from mitochondria	20	0.685806	2.01166	0.000489414	0.0233071	0.0209822	2219	tags=45%, list=11%, signal=40%	MFF/TNFSF10/MOAP1/PPIF/BAD/MLLT11/PDCD5/BID/BNIP3
BP	GO:0045761	regulation of adenylate cyclase activity	37	0.589474	2.01118	0.000114695	0.00881526	0.00793592	1466	tags=27%, list=8%, signal=25%	ADCYAP1/HPCA/VIPR2/GABBR2/GRM2/GRM3/EDNRA/CALM3/CAP1/CAP2
BP	GO:0099054	presynapse assembly	43	0.566585	2.01085	9.78386e-05	0.00799497	0.00719746	3679	tags=47%, list=19%, signal=38%	CBLN2/SNCA/CBLN1/SLITRK5/SDCBP/LRRTM3/MDGA1/NLGN1/SLITRK4/NLGN4Y/SLITRK3/LRFN4/EFNB2/GPC6/NLGN4X/LRFN5/PTEN/SLITRK1/LRFN3/NTNG2
BP	GO:0042773	ATP synthesis coupled electron transport	74	0.520495	2.0085	9.56828e-06	0.00134913	0.00121455	4393	tags=50%, list=23%, signal=39%	SNCA/COX7B/NDUFB3/COX6B1/COX7A2/NDUFA12/NDUFA1/NDUFB6/NDUFV2/NDUFB2/NDUFAB1/COX6C/COX5A/CYCS/NDUFB4/UQCRH/NDUFS5/BID/COX7C/UQCRHL/NDUFA2/NDUFS4/COX8A/CHCHD2/UQCRC2/CYC1/UQCRB/NDUFA8/NDUFA4/UQCRQ/NDUFA7/SDHD/NDUFAF1/NDUFA6/UQCRC1/UQCRFS1/DNAJC15
BP	GO:0042775	mitochondrial ATP synthesis coupled electron transport	74	0.520495	2.0085	9.56828e-06	0.00134913	0.00121455	4393	tags=50%, list=23%, signal=39%	SNCA/COX7B/NDUFB3/COX6B1/COX7A2/NDUFA12/NDUFA1/NDUFB6/NDUFV2/NDUFB2/NDUFAB1/COX6C/COX5A/CYCS/NDUFB4/UQCRH/NDUFS5/BID/COX7C/UQCRHL/NDUFA2/NDUFS4/COX8A/CHCHD2/UQCRC2/CYC1/UQCRB/NDUFA8/NDUFA4/UQCRQ/NDUFA7/SDHD/NDUFAF1/NDUFA6/UQCRC1/UQCRFS1/DNAJC15
CC	GO:0098948	intrinsic component of postsynaptic specialization membrane	59	0.534258	2.00729	6.14312e-05	0.00589002	0.00530248	3366	tags=44%, list=17%, signal=37%	ATP2B2/ADCY1/GRIN2A/ADRA2A/LRRTM3/LRRC4C/NLGN1/NPTN/NLGN4Y/CACNG3/RGS7BP/SLITRK3/LRFN4/SLC16A3/CHRM1/LRFN2/KCND2/GABRA5/EFNB2/GSG1L/CNIH2/NLGN4X/LRFN5/GRIN3A/SLITRK1/LRFN3
BP	GO:0015671	oxygen transport	12	0.794755	2.00324	0.000379051	0.0190923	0.0171878	1017	tags=50%, list=5%, signal=47%	HBG1/HBG2/NGB/HBA1/HBA2/HBQ1
MF	GO:0005344	oxygen carrier activity	10	0.831138	2.002	0.00018239	0.0121441	0.0109327	1017	tags=60%, list=5%, signal=57%	HBG1/HBG2/NGB/HBA1/HBA2/HBQ1
BP	GO:2001257	regulation of cation channel activity	135	0.472075	2.00059	3.65346e-07	9.73039e-05	8.75977e-05	2820	tags=35%, list=15%, signal=30%	ARC/KCNG1/HPCA/NPPA/RASGRF1/CRH/FKBP1B/NETO2/CNIH3/KCNA1/CABP1/DLG1/CACNB3/FKBP1A/HOMER1/NLGN1/TREM2/FGF14/VAMP2/CALM2/KCNS1/EPHB2/FGF11/PPP3CA/CRHBP/CACNG3/GRP/CASQ1/EDNRA/OPRL1/CALM3/MEF2C/LRRC38/CACNB1/RASGRF2/AKAP6/GSG1L/HCN1/FGF13/KCNS2/PDE4D/PRRT1/CDK5/PPP3CB/CNIH2/IFNGR2/FGF12
CC	GO:0098936	intrinsic component of postsynaptic membrane	91	0.498809	1.99668	8.14552e-06	0.0012203	0.00109857	1835	tags=33%, list=9%, signal=30%	ATP2B2/ADCY1/GRIN2A/ADRA2A/KCNA1/LRRTM3/LRRC4C/GABRD/NLGN1/GRM2/EPHB2/EPHA4/GRM3/NPTN/NLGN4Y/CSPG5/CACNG3/RGS7BP/SLITRK3/CNTN1/LRFN4/SLC16A3/CHRM1/CNTN2/LRFN2/KCND2/GABRA5/EFNB2/GSG1L/PCDH8
MF	GO:0099106	ion channel regulator activity	102	0.487306	1.98651	2.70969e-06	0.000509096	0.000458313	1999	tags=31%, list=10%, signal=28%	PRKCB/KCNV1/FKBP1B/ENSA/CABP1/DLG1/STX1A/CACNB3/SCN3B/FGF14/GRM2/CALM2/KCNS1/TSPAN13/SCN1B/NRXN1/KCNIP3/FGF11/GRM3/NPY/FXYD5/PACSIN3/LRRC38/YWHAE/KCNIP1/KCNMB4/VAMP8/VTI1B/ITPR1/NRXN2/ARPP19/FGF13
CC	GO:0043197	dendritic spine	136	0.46914	1.98255	6.36072e-07	0.000147548	0.00013283	1883	tags=30%, list=10%, signal=27%	ATP2B2/RPH3A/ARC/HPCA/GRIN2A/SLC8A2/LZTS1/NRGN/ATP1A3/MAP1B/ASAP1/SLA/HOMER1/LPAR1/NLGN1/DGKI/EPHB2/ZNF804A/FRMPD4/DDN/PPP3CA/EPHA4/GRM3/RGS7BP/ATP2B1/KIF3B/CDK5R1/IGF2BP1/STRN4/SEZ6/SLC1A1/MAPT/GRIN1/PPP1R9B/CDC42/KCND2/RGS14/ATP6AP2/SORCS2/KCND1/ITPKA
CC	GO:0044309	neuron spine	136	0.46914	1.98255	6.36072e-07	0.000147548	0.00013283	1883	tags=30%, list=10%, signal=27%	ATP2B2/RPH3A/ARC/HPCA/GRIN2A/SLC8A2/LZTS1/NRGN/ATP1A3/MAP1B/ASAP1/SLA/HOMER1/LPAR1/NLGN1/DGKI/EPHB2/ZNF804A/FRMPD4/DDN/PPP3CA/EPHA4/GRM3/RGS7BP/ATP2B1/KIF3B/CDK5R1/IGF2BP1/STRN4/SEZ6/SLC1A1/MAPT/GRIN1/PPP1R9B/CDC42/KCND2/RGS14/ATP6AP2/SORCS2/KCND1/ITPKA
BP	GO:0050803	regulation of synapse structure or activity	166	0.451048	1.97948	1.21503e-07	3.79881e-05	3.41988e-05	3408	tags=39%, list=18%, signal=33%	TNNI3K/CBLN2/ARC/CUX2/NGEF/SNCA/CDH8/ST8SIA2/CBLN1/SLITRK5/TUBA1A/STAU2/AGRN/LRRTM3/MDGA1/HOMER1/NLGN1/TREM2/SLITRK4/EPHB2/NRXN1/ZNF804A/FRMPD4/LRRN3/EPHA4/SLITRK3/CDK5R1/LRFN4/HSPA8/CAMK1/EPHB1/CAMK2B/MEF2C/TUBB/LRFN2/C1QL3/TPBG/ACTR2/BDNF/EPHB3/NEUROD2/CLSTN1/PCDH8/IL10RA/ITPKA/DHX36/DBNL/CDK5/LHFPL4/TANC2/CAMKV/SETD5/GPC6/GHRL/UBE3A/ARF4/LRFN5/PTEN/LRTM2/YWHAZ/SLITRK1/CTNNA2/LRFN3/SLC17A7/ABI3
CC	GO:0043025	neuronal cell body	388	0.40842	1.97462	1e-10	1.4382e-07	1.29474e-07	2560	tags=27%, list=13%, signal=24%	PVALB/NGB/ATP2B2/PCSK1/ADCYAP1/TAC1/STMN2/ARC/CX3CL1/HPCA/NPPA/SLC8A2/PENK/SERPINI1/CRH/NRGN/SNCA/ATP1A3/MAP1B/PNOC/VGF/PTPRN/ADRA2A/KCNA1/L1CAM/STAU2/RTN1/OLFM1/HOMER1/GABRD/KCNB1/LPAR1/APOD/KCNK1/RTN4RL1/TUBB3/SST/EPHB2/SCN1B/CRMP1/SEZ6L/NRXN1/ZNF804A/DDN/EPHA5/EPHA4/CRHBP/NPY/PDE1B/RGS7BP/ATP2B1/CDK5R1/CYBB/KCNB2/TIAM2/PI4K2A/DPYSL5/IGF2BP1/RTN4RL2/THY1/SEZ6/CNTN2/PDE9A/VTI1B/CADM2/SEZ6L2/TMEM…
CC	GO:0098889	intrinsic component of presynaptic membrane	58	0.528357	1.97317	6.3706e-05	0.00595113	0.00535749	1712	tags=34%, list=9%, signal=32%	ATP2B2/NTNG1/ATP1A3/ADRA2A/SLC1A6/KCNA1/STX1A/CPLX3/EPHB2/EPHA4/GRM3/NPTN/PSENEN/RGS7BP/ATP2B1/CNTN1/CHRM1/ADAM23/GABRA5/EFNB2
CC	GO:0046658	anchored component of plasma membrane	40	0.564712	1.97144	0.000200499	0.0126361	0.0113756	4007	tags=62%, list=21%, signal=50%	RGMB/IGSF21/NTNG1/LYPD3/CPLX3/MDGA1/RTN4RL1/NRN1/CD14/FOLR2/RGS7BP/CNTN1/PRMT8/RTN4RL2/THY1/CNTN2/GPC2/GPC6/CD59/ULBP2/GAS1/NTNG2/EEPD1/ULBP1/RTN4R
CC	GO:0099699	integral component of synaptic membrane	111	0.475018	1.96484	7.53605e-06	0.00120426	0.00108413	1835	tags=30%, list=9%, signal=27%	ATP2B2/ADCY1/GRIN2A/ATP1A3/ADRA2A/SLC1A6/KCNA1/STX1A/LRRTM3/LRRC4C/GABRD/NLGN1/GRM2/EPHB2/EPHA4/GRM3/NPTN/NLGN4Y/CSPG5/PSENEN/CACNG3/SLITRK3/ATP2B1/LRFN4/SLC16A3/CHRM1/LRFN2/ADAM23/KCND2/GABRA5/EFNB2/GSG1L/PCDH8
BP	GO:0099172	presynapse organization	46	0.544679	1.96361	0.000240227	0.014077	0.0126728	3366	tags=41%, list=17%, signal=34%	CBLN2/SNCA/CBLN1/SLITRK5/SDCBP/LRRTM3/MDGA1/NLGN1/SLITRK4/NLGN4Y/SLITRK3/LRFN4/EFNB2/GPC6/NLGN4X/LRFN5/PTEN/SLITRK1/LRFN3
BP	GO:0042551	neuron maturation	39	0.563615	1.96313	0.000433809	0.0213666	0.0192352	1978	tags=33%, list=10%, signal=30%	CX3CL1/C1QA/BCL11A/NR4A2/AGRN/GLDN/KCNB1/EPHA8/EDNRA/RND1/CNTN2/B4GALT5/MAP3K13
CC	GO:0098794	postsynapse	498	0.396972	1.96274	1e-10	1.4382e-07	1.29474e-07	3154	tags=32%, list=16%, signal=27%	ATP2B2/ADCY1/RPH3A/DCLK1/ARC/HPCA/GRIN2A/IGSF21/SLC8A2/LZTS1/PLCB1/DLGAP4/NRGN/SNCA/C1QA/ATP1A1/PRKCG/ATP1A3/MAP1B/C1QB/ADRA2A/C1QC/CHRNA2/NETO2/CNIH3/KCNA1/BCL11A/CABP1/DLG1/CBLN1/GLRB/ASAP1/GABBR2/STX1A/SLC6A17/LRRTM4/KCTD8/LRRTM3/SLA/LRRC4C/HOMER1/RTN4/GABRD/KCNB1/LPAR1/NLGN1/HOMER2/SLC29A1/GRM2/DGKI/EPHB2/ZNF804A/FRMPD4/DDN/TPPP/PPP3CA/EPHA4/GABRA1/GRM3/APC2/NPTN/NLGN4Y/CSPG5/RAB4A/HIP1/CACNG…
BP	GO:0050808	synapse organization	349	0.411653	1.96115	1e-10	1.4382e-07	1.29474e-07	2834	tags=31%, list=15%, signal=27%	TNNI3K/CBLN2/ARC/CX3CL1/IGSF21/SLC8A2/CUX2/NGEF/SNCA/C1QA/NTNG1/CDH8/MAP1B/NRG1/C1QB/C1QC/ST8SIA2/L1CAM/DLG1/CBLN1/GLRB/SLITRK5/TUBA1A/SDCBP/STAU2/AGRN/CACNB3/SLC25A46/LRRTM3/LRRC4C/MDGA1/HOMER1/NLGN1/TREM2/SLITRK4/LGMN/EPHB2/LGI2/SEZ6L/NRXN1/ZNF804A/FRMPD4/LRRN3/EPHA4/UNC13A/GABRA1/NPTN/NLGN4Y/HAPLN4/SLITRK3/CDK5R1/LRFN4/HSPA8/CAMK1/EPHB1/CAMK2B/MEF2C/CACNB1/RAB3A/ADAM10/SEZ6/CNTN2/TUBB/LRFN2/SE…
CC	GO:0044297	cell body	442	0.399818	1.95934	1e-10	1.4382e-07	1.29474e-07	2560	tags=27%, list=13%, signal=24%	PVALB/RIT2/NGB/ATP2B2/PCSK1/ADCYAP1/TAC1/STMN2/ARC/CX3CL1/HPCA/NPPA/SLC8A2/PENK/SERPINI1/CRH/NRGN/SNCA/ATP1A3/MAP1B/PNOC/VGF/PTPRN/ADRA2A/KCNA1/L1CAM/STAU2/RTN1/OLFM1/HOMER1/GABRD/KCNB1/LPAR1/APOD/KCNK1/RTN4RL1/TUBB3/SST/EPHB2/SCN1B/CRMP1/SEZ6L/NRXN1/ZNF804A/DDN/EPHA5/EPHA4/CRHBP/NPY/PDE1B/RGS7BP/ATP2B1/CDK5R1/CYBB/KCNB2/TIAM2/PI4K2A/DPYSL5/IGF2BP1/RTN4RL2/CXADR/THY1/SEZ6/CNTN2/TUBB/PDE9A/VTI1B/C…
MF	GO:0046906	tetrapyrrole binding	89	0.492283	1.959	9.96263e-06	0.00137687	0.00123952	3810	tags=42%, list=20%, signal=34%	HBG1/HBG2/NGB/HBA1/CYP26B1/HBA2/CYP26A1/CYB561D1/CYP51A1/NOS2/PTGS2/HBQ1/MMAB/CYBB/CYP46A1/PTGIS/TPO/PXDNL/CYCS/MMACHC/GUCY1A2/FA2H/HBB/CYC1/CYP4F12/TCN2/DGCR8/HMOX1/CD320/CYP4V2/CYB561D2/HBD/PXDN/TBXAS1/CYP2E1/SDHD/HMOX2
BP	GO:0019646	aerobic electron transport chain	68	0.512148	1.95721	6.42612e-05	0.00595113	0.00535749	4393	tags=50%, list=23%, signal=39%	SNCA/COX7B/NDUFB3/COX6B1/COX7A2/NDUFA1/NDUFB6/NDUFV2/NDUFB2/NDUFAB1/COX6C/COX5A/CYCS/NDUFB4/UQCRH/NDUFS5/COX7C/UQCRHL/NDUFA2/NDUFS4/COX8A/UQCRC2/CYC1/UQCRB/NDUFA8/NDUFA4/UQCRQ/NDUFA7/SDHD/NDUFAF1/NDUFA6/UQCRC1/UQCRFS1/DNAJC15
CC	GO:0000313	organellar ribosome	84	0.497601	1.95568	2.30252e-05	0.00267056	0.00240416	5741	tags=62%, list=30%, signal=44%	MRPL3/MRPS23/MRPL45/MRPL18/MRPS35/MRPL19/MRPL33/MRPL1/MRPS18C/MRPL39/MRPS12/MRPL54/MRPS30/MRPS27/MRPS17/MRPL4/MRPS33/MRPL36/MRPL40/MRPL14/MRPL2/MRPS24/MRPL21/MRPL28/MRPL15/MPV17L2/MRPS21/MRPL9/MRPL12/NDUFA7/MRPL47/GADD45GIP1/MRPL37/MRPL50/MRPL46/CHCHD1/MRPL13/MRPS28/MRPS18B/NSUN3/MRPL51/MRPL44/MRPL49/MRPL55/MRPL22/MRPS15/MRPS34/MRPS9/MRPS11/MRPS7/NSUN4/MRPL48
CC	GO:0005761	mitochondrial ribosome	84	0.497601	1.95568	2.30252e-05	0.00267056	0.00240416	5741	tags=62%, list=30%, signal=44%	MRPL3/MRPS23/MRPL45/MRPL18/MRPS35/MRPL19/MRPL33/MRPL1/MRPS18C/MRPL39/MRPS12/MRPL54/MRPS30/MRPS27/MRPS17/MRPL4/MRPS33/MRPL36/MRPL40/MRPL14/MRPL2/MRPS24/MRPL21/MRPL28/MRPL15/MPV17L2/MRPS21/MRPL9/MRPL12/NDUFA7/MRPL47/GADD45GIP1/MRPL37/MRPL50/MRPL46/CHCHD1/MRPL13/MRPS28/MRPS18B/NSUN3/MRPL51/MRPL44/MRPL49/MRPL55/MRPL22/MRPS15/MRPS34/MRPS9/MRPS11/MRPS7/NSUN4/MRPL48
BP	GO:0099175	regulation of postsynapse organization	71	0.507625	1.95522	3.75354e-05	0.00415257	0.00373834	2789	tags=35%, list=14%, signal=30%	TNNI3K/ARC/CUX2/NGEF/CBLN1/STAU2/HOMER1/NLGN1/EPHB2/ZNF804A/EPHA4/CDK5R1/LRFN4/HSPA8/CAMK2B/LRFN2/ACTR2/ITPKA/DHX36/DBNL/CDK5/TANC2/GHRL/UBE3A/ARF4
MF	GO:0005246	calcium channel regulator activity	32	0.593239	1.95262	0.000598636	0.0262487	0.0236304	1814	tags=47%, list=9%, signal=43%	PRKCB/FKBP1B/CABP1/STX1A/CACNB3/GRM2/CALM2/TSPAN13/NRXN1/GRM3/NPY/PACSIN3/YWHAE/ITPR1/NRXN2
CC	GO:0150034	distal axon	224	0.429994	1.95172	1.1579e-08	7.56949e-06	6.81442e-06	2113	tags=28%, list=11%, signal=25%	PCSK1/STMN2/PRKCB/KIF21B/TSHZ3/SYP/SLC8A2/PENK/RASGRF1/NGEF/SNCA/PRKCG/CDH8/GDPD5/ATP1A3/MAP1B/SLC32A1/PNOC/PTPRN/ADRA2A/KCNA1/L1CAM/CDK5R2/CPLX3/OLFM1/TUBB3/BASP1/CRMP1/ZNF804A/EPHA4/UNC13A/CRHBP/STMN4/NPY/CDK5R1/GPRIN1/NMU/HSPA8/TIAM2/CALM3/IGF2BP1/CXADR/FSCN1/RAB3A/THY1/CHRM1/TRPV2/MYO5A/NEFL/SLC1A1/TPBG/MAPT/GRIN1/EXOC6/PPP1R9B/STMN3/NRSN1/FGF13/SNCB/ARPC5/LMTK2/FEZ1
CC	GO:0043679	axon terminus	83	0.499525	1.95113	1.68441e-05	0.00212501	0.00191304	1589	tags=31%, list=8%, signal=29%	PCSK1/PRKCB/SYP/SLC8A2/PENK/SNCA/PRKCG/CDH8/ATP1A3/SLC32A1/PNOC/PTPRN/ADRA2A/KCNA1/CPLX3/EPHA4/UNC13A/CRHBP/NPY/NMU/HSPA8/RAB3A/CHRM1/SLC1A1/TPBG/GRIN1
BP	GO:0045071	negative regulation of viral genome replication	45	0.54268	1.95072	0.000355674	0.0189456	0.0170557	1724	tags=33%, list=9%, signal=30%	OAS2/SRPK1/IFITM1/BST2/OAS3/BTBD17/IFIH1/OASL/ISG20/ISG15/RSAD2/OAS1/PLSCR1/TRIM6/CCL5
MF	GO:0005003	ephrin receptor activity	13	0.760889	1.9486	0.000376657	0.0190923	0.0171878	1738	tags=54%, list=9%, signal=49%	EPHB6/EPHA8/EPHB2/EPHA5/EPHA4/EPHB1/EPHB3
MF	GO:0016247	channel regulator activity	106	0.476066	1.94705	5.27601e-06	0.000934857	0.000841603	1999	tags=31%, list=10%, signal=28%	PRKCB/KCNV1/FKBP1B/ENSA/CABP1/DLG1/STX1A/CACNB3/SCN3B/FGF14/GRM2/CALM2/KCNS1/TSPAN13/SCN1B/NRXN1/KCNIP3/FGF11/GRM3/CACNG3/NPY/FXYD5/PACSIN3/LRRC38/YWHAE/KCNIP1/KCNMB4/VAMP8/VTI1B/ITPR1/NRXN2/ARPP19/FGF13
BP	GO:0051339	regulation of lyase activity	48	0.531561	1.93896	0.000544875	0.0249456	0.0224572	1673	tags=25%, list=9%, signal=23%	ADCYAP1/HPCA/VIPR2/GABBR2/NOS2/GRM2/GRM3/EDNRA/CALM3/CAP1/CAP2/RCVRN
BP	GO:0022898	regulation of transmembrane transporter activity	205	0.432158	1.93827	6.30346e-08	2.38569e-05	2.14772e-05	2820	tags=32%, list=15%, signal=27%	ARC/KCNG1/HPCA/NPPA/RASGRF1/CRH/SNCA/SLN/FKBP1B/ADRA2A/NETO2/CNIH3/KCNA1/CABP1/DLG1/GLRX/CACNB3/PRKCE/FKBP1A/SCN3B/HOMER1/ATP1B1/NLGN1/TREM2/FGF14/VAMP2/CALM2/KCNS1/EPHB2/SCN1B/FGF11/PPP3CA/CRHBP/COX17/CACNG3/GRP/FXYD5/CASQ1/HECW1/EDNRA/OPRL1/CALM3/MEF2C/LRRC38/YWHAE/PTAFR/CACNB1/PPIF/RASGRF2/AKAP6/GSG1L/HCN1/PIM1/FGF13/KCNS2/PDE4D/PRRT1/STK39/CDK5/ACTB/PPP3CB/ATP1B3/CNIH2/IFNGR2/FGF12
CC	GO:0034705	potassium channel complex	71	0.502045	1.93373	5.76759e-05	0.00568148	0.00511474	2091	tags=30%, list=11%, signal=26%	KCNH4/KCNG1/KCNF1/KCNV1/KCNA1/KCNB1/KCNK1/CALM2/KCNS1/KCNIP3/KCNB2/CALM3/LRRC38/KCNQ3/KCNJ16/KCNIP1/KCNMB4/KCND2/HCN1/KCND1/KCNS2
CC	GO:0099055	integral component of postsynaptic membrane	87	0.487199	1.92958	1.56775e-05	0.00201316	0.00181235	1835	tags=31%, list=9%, signal=28%	ATP2B2/ADCY1/GRIN2A/ADRA2A/KCNA1/LRRTM3/LRRC4C/GABRD/NLGN1/GRM2/EPHB2/EPHA4/GRM3/NPTN/NLGN4Y/CSPG5/CACNG3/SLITRK3/LRFN4/SLC16A3/CHRM1/LRFN2/KCND2/GABRA5/EFNB2/GSG1L/PCDH8
BP	GO:0007158	neuron cell-cell adhesion	16	0.703461	1.92774	0.000688976	0.0293161	0.0263918	2891	tags=50%, list=15%, signal=43%	NLGN1/NRXN1/CNTN4/NLGN4Y/CDK5R1/NRXN2/ASTN2/NLGN4X
BP	GO:0099177	regulation of trans-synaptic signaling	354	0.403293	1.92194	1.59244e-10	1.90855e-07	1.71816e-07	2453	tags=27%, list=13%, signal=24%	ADCY1/RGS4/PRKCB/ARC/CX3CL1/TSHZ3/GRIN2A/SYP/SLC8A2/RASGRF1/CUX2/LZTS1/PLCB1/DLGAP4/NRGN/SNCA/PRKCG/NTNG1/MAP1B/VGF/ADRA2A/RARA/NPTXR/PLCL2/TMEM25/CBLN1/NPTX2/STAU2/EGR2/STX1A/PRKCE/CPLX3/LRRC4C/HOMER1/KCNB1/NLGN1/TUBB2B/VAMP2/GRM2/DGKI/LGMN/EPHB2/SYT12/NRXN1/PPP3CA/EPHA4/UNC13A/CNTN4/GRM3/PTGS2/NPTN/NLGN4Y/CSPG5/CACNG3/ATP2A2/NMU/EPHB1/CAMK2B/CALM3/MEF2C/CYP46A1/RAB3A/KCNMB4/CNTN2/LRFN2/USP46/GR…
BP	GO:0032412	regulation of ion transmembrane transporter activity	197	0.429339	1.92008	3.37086e-07	9.32301e-05	8.39303e-05	2820	tags=31%, list=15%, signal=27%	ARC/KCNG1/HPCA/NPPA/RASGRF1/CRH/SLN/FKBP1B/ADRA2A/NETO2/CNIH3/KCNA1/CABP1/DLG1/GLRX/CACNB3/PRKCE/FKBP1A/SCN3B/HOMER1/ATP1B1/NLGN1/TREM2/FGF14/VAMP2/CALM2/KCNS1/EPHB2/SCN1B/FGF11/PPP3CA/CRHBP/COX17/CACNG3/GRP/FXYD5/CASQ1/HECW1/EDNRA/OPRL1/CALM3/MEF2C/LRRC38/YWHAE/PTAFR/CACNB1/PPIF/RASGRF2/AKAP6/GSG1L/HCN1/FGF13/KCNS2/PDE4D/PRRT1/STK39/CDK5/PPP3CB/ATP1B3/CNIH2/IFNGR2/FGF12
MF	GO:0020037	heme binding	82	0.488866	1.91857	6.62064e-05	0.00595113	0.00535749	3810	tags=40%, list=20%, signal=32%	HBG1/HBG2/NGB/HBA1/CYP26B1/HBA2/CYP26A1/CYB561D1/CYP51A1/NOS2/PTGS2/HBQ1/CYBB/CYP46A1/PTGIS/TPO/PXDNL/CYCS/GUCY1A2/FA2H/HBB/CYC1/CYP4F12/DGCR8/HMOX1/CYP4V2/CYB561D2/HBD/PXDN/TBXAS1/CYP2E1/SDHD/HMOX2
BP	GO:0048167	regulation of synaptic plasticity	159	0.43969	1.91478	1.24749e-06	0.000280334	0.00025237	2070	tags=27%, list=11%, signal=24%	ADCY1/ARC/CX3CL1/TSHZ3/GRIN2A/SYP/SLC8A2/RASGRF1/LZTS1/NRGN/SNCA/PRKCG/MAP1B/VGF/RARA/CBLN1/STAU2/EGR2/KCNB1/VAMP2/LGMN/EPHB2/SYT12/EPHA4/CNTN4/PTGS2/NPTN/CAMK2B/MEF2C/CYP46A1/RAB3A/CNTN2/SLC1A1/MAPT/GRIN1/RGS14/RASGRF2/SORCS2/PRKAR1B/NEUROD2/ITPKA/RIMS1/YWHAG
BP	GO:0050804	modulation of chemical synaptic transmission	353	0.40146	1.91415	3.21822e-10	3.30603e-07	2.97624e-07	2453	tags=27%, list=13%, signal=24%	ADCY1/RGS4/PRKCB/ARC/CX3CL1/TSHZ3/GRIN2A/SYP/SLC8A2/RASGRF1/CUX2/LZTS1/PLCB1/DLGAP4/NRGN/SNCA/PRKCG/NTNG1/MAP1B/VGF/ADRA2A/RARA/NPTXR/PLCL2/TMEM25/CBLN1/NPTX2/STAU2/EGR2/STX1A/PRKCE/CPLX3/LRRC4C/HOMER1/KCNB1/NLGN1/TUBB2B/VAMP2/GRM2/DGKI/LGMN/EPHB2/SYT12/NRXN1/PPP3CA/EPHA4/UNC13A/CNTN4/GRM3/PTGS2/NPTN/NLGN4Y/CSPG5/CACNG3/ATP2A2/NMU/EPHB1/CAMK2B/CALM3/MEF2C/CYP46A1/RAB3A/KCNMB4/CNTN2/LRFN2/USP46/GR…
BP	GO:0031646	positive regulation of nervous system process	26	0.614751	1.9137	0.00133336	0.0474662	0.0427314	2054	tags=35%, list=11%, signal=31%	CARTPT/ZNF488/EGR2/MAG/TPPP/OPRL1/PTAFR/PRKAR1B/RIMS1
BP	GO:0032543	mitochondrial translation	118	0.462942	1.91281	1.01479e-05	0.00137687	0.00123952	5553	tags=55%, list=29%, signal=40%	MRPL3/MRPS23/MRPL45/MRPL18/WARS2/MRPS35/MRPL19/MRPL33/MRPL1/RPUSD3/MRPS18C/MRPL39/MRPS12/MRPL54/TSFM/MRPS30/MRPS27/MRPS17/EARS2/MRPL4/YARS2/MRPS33/MRPL36/MRPL40/MRPL14/MRPL2/MRPS24/MRPL21/MRPL28/MRPL15/MTIF3/QRSL1/GATC/MPV17L2/MRPS21/C1QBP/MRPL9/MRPL12/NDUFA7/MRPL47/GADD45GIP1/MRPL37/MRPL50/MRPL46/CHCHD1/MRPL13/IARS2/MRPS28/MRPS18B/RPUSD4/NSUN3/RMND1/MRPL51/FASTKD3/MRPL44/MRPL49/MRPL55/MRPL22/MRP…
CC	GO:0070469	respirasome	72	0.494977	1.91251	6.04145e-05	0.00587082	0.0052852	4349	tags=49%, list=22%, signal=38%	COX7B/NDUFB3/COX6B1/COX7A2/NDUFA12/NDUFA1/NNT/NDUFB6/NDUFV2/NDUFB2/NDUFAB1/COX6C/COX5A/CYCS/NDUFB4/UQCRH/NDUFS5/COX7C/UQCRHL/NDUFA2/NDUFS4/COX8A/UQCRC2/CYC1/UQCRB/NDUFA8/NDUFA4/UQCRQ/NDUFA7/SDHD/NDUFAF1/NDUFA6/UQCRC1/UQCRFS1/NDUFB11
BP	GO:0048168	regulation of neuronal synaptic plasticity	44	0.535156	1.90876	0.000756992	0.0311059	0.028003	1589	tags=32%, list=8%, signal=29%	ARC/GRIN2A/SYP/SLC8A2/RASGRF1/SNCA/VGF/EGR2/EPHB2/NPTN/CAMK2B/RAB3A/CNTN2/GRIN1
CC	GO:0031225	anchored component of membrane	103	0.465863	1.90453	2.39949e-05	0.00273884	0.00246564	3867	tags=43%, list=20%, signal=34%	RGMB/GFRA2/SPRN/IGSF21/ALPL/NTNG1/LYPD3/BST2/CPLX3/MDGA1/LY6E/RTN4RL1/NRN1/CD14/CNTN4/FOLR2/CD55/TNFRSF10C/RGS7BP/CNTN1/PRMT8/ART3/RTN4RL2/RAB3A/THY1/CNTN2/LYPD6/GPC2/RAB3C/TECTA/ENPP6/RAB35/GPC6/VNN2/CD59/GAD2/ULBP2/MDGA2/GAS1/NTNG2/RGMA/EEPD1/ULBP1/DNAJC5
CC	GO:0044391	ribosomal subunit	176	0.433326	1.90405	1.42722e-06	0.000301857	0.000271746	6037	tags=53%, list=31%, signal=37%	RPS4Y1/HBA1/HBA2/RPL29/MRPL3/RPL36A/RPL26L1/MRPS23/RPL39L/MRPL45/MRPL18/MRPS35/MRPL19/MRPL33/ISG15/MRPL1/MRPS18C/MRPL39/MRPS12/MRPL54/RPS21/MRPS30/MRPS27/MRPS17/MRPL4/MRPS33/RPS7/RPL34/RPL41/MRPL36/MRPL40/RPL6/MRPL14/RPL39/RPS27L/MRPL2/MRPS24/RPL28/MRPL21/MRPL28/MRPL15/RPL37A/MPV17L2/MRPS21/RPL27/MRPL9/MRPL12/MRPL47/GADD45GIP1/MRPL37/RPL31/RPS20/MRPL50/MRPL46/CHCHD1/MRPL13/RPS13/RPS5/MRPS28/MRPS1…
BP	GO:0032409	regulation of transporter activity	222	0.420596	1.89823	1.00824e-07	3.45251e-05	3.10812e-05	2820	tags=32%, list=15%, signal=27%	ARC/KCNG1/HPCA/NPPA/RASGRF1/CRH/SNCA/SLN/FKBP1B/ADRA2A/NETO2/CNIH3/KCNA1/CABP1/DLG1/GLRX/CACNB3/PRKCE/FKBP1A/SCN3B/HOMER1/NDFIP2/ATP1B1/NLGN1/TREM2/PPARG/FGF14/VAMP2/CALM2/KCNS1/EPHB2/SCN1B/FGF11/PPP3CA/CRHBP/COX17/CACNG3/SYNGR3/GRP/FXYD5/CASQ1/HECW1/EDNRA/OPRL1/CALM3/MEF2C/LRRC38/YWHAE/PTAFR/CACNB1/PPIF/RASGRF2/AKAP6/GSG1L/HCN1/PIM1/FGF13/KCNS2/NDFIP1/PDE4D/PRRT1/STK39/CDK5/ACTB/PPP3CB/ATP1B3/PR…
CC	GO:0005746	mitochondrial respirasome	68	0.496361	1.89688	0.000151298	0.0106665	0.00960248	4349	tags=50%, list=22%, signal=39%	COX7B/NDUFB3/COX6B1/COX7A2/NDUFA12/NDUFA1/NNT/NDUFB6/NDUFV2/NDUFB2/NDUFAB1/COX6C/COX5A/NDUFB4/UQCRH/NDUFS5/COX7C/UQCRHL/NDUFA2/NDUFS4/COX8A/UQCRC2/CYC1/UQCRB/NDUFA8/NDUFA4/UQCRQ/NDUFA7/SDHD/NDUFAF1/NDUFA6/UQCRC1/UQCRFS1/NDUFB11
BP	GO:0048013	ephrin receptor signaling pathway	40	0.543172	1.89624	0.000487035	0.0233071	0.0209822	2479	tags=42%, list=13%, signal=37%	NGEF/EPHB6/EPHA8/EPHB2/EPHA5/EPHA4/CDK5R1/EPHB1/LYN/NCK2/KALRN/CHN1/EFNB2/EPHB3/EFNB1/ARHGEF7/PAK1
MF	GO:0005179	hormone activity	52	0.51454	1.8948	0.000316044	0.0170878	0.0153832	1452	tags=27%, list=7%, signal=25%	CORT/CARTPT/ADCYAP1/NPPA/PENK/CRH/PNOC/VGF/CHGB/SST/NPY/GRP/STC1/FNDC5
BP	GO:0016322	neuron remodeling	13	0.739857	1.89474	0.000940262	0.0357747	0.0322061	1246	tags=46%, list=6%, signal=43%	CX3CL1/C1QA/BCL11A/EPHA8/EDNRA/RND1
CC	GO:0098803	respiratory chain complex	65	0.496479	1.89335	0.000244899	0.0142022	0.0127855	4349	tags=51%, list=22%, signal=40%	COX7B/NDUFB3/COX6B1/COX7A2/NDUFA12/NDUFA1/NDUFB6/NDUFV2/NDUFB2/NDUFAB1/COX6C/COX5A/NDUFB4/UQCRH/NDUFS5/COX7C/UQCRHL/NDUFA2/NDUFS4/COX8A/UQCRC2/CYC1/UQCRB/NDUFA8/NDUFA4/UQCRQ/NDUFA7/SDHD/NDUFAF1/NDUFA6/UQCRC1/UQCRFS1/NDUFB11
CC	GO:0070069	cytochrome complex	25	0.610712	1.88782	0.00111216	0.0412245	0.0371123	4200	tags=68%, list=22%, signal=53%	COX7B/COX6B1/COX7A2/COX10/COX6C/COX5A/UQCRH/COX7C/UQCRHL/COX8A/UQCRC2/CYC1/UQCRB/NDUFA4/UQCRQ/UQCRC1/UQCRFS1
BP	GO:0099173	postsynapse organization	134	0.4447	1.88078	5.33015e-06	0.000934857	0.000841603	2891	tags=32%, list=15%, signal=27%	TNNI3K/ARC/CUX2/NGEF/DLG1/CBLN1/GLRB/STAU2/HOMER1/NLGN1/TREM2/LGMN/EPHB2/NRXN1/ZNF804A/EPHA4/NLGN4Y/SLITRK3/CDK5R1/LRFN4/HSPA8/EPHB1/CAMK2B/ADAM10/LRFN2/NEFL/ACTR2/CDC42/EPHB3/NRXN2/ITPKA/DHX36/DBNL/CDK5/LHFPL4/TANC2/ACTB/GHRL/UBE3A/NEFH/INA/ARF4/NLGN4X
CC	GO:0098839	postsynaptic density membrane	67	0.493395	1.88042	0.000202079	0.0126361	0.0113756	3366	tags=45%, list=17%, signal=37%	ATP2B2/ADCY1/ARC/GRIN2A/ADRA2A/DLG1/LRRTM3/LRRC4C/EPHA4/NPTN/NLGN4Y/CACNG3/RGS7BP/SLITRK3/LRFN4/SLC16A3/CHRM1/LRFN2/EFNB2/SORCS2/GSG1L/PRRT1/PRR7/DAGLA/CNIH2/NLGN4X/LRFN5/GRIN3A/SLITRK1/LRFN3
CC	GO:0044306	neuron projection terminus	95	0.465258	1.87604	7.19487e-05	0.00630955	0.00568016	1589	tags=28%, list=8%, signal=26%	PCSK1/PRKCB/SYP/SLC8A2/PENK/SNCA/PRKCG/CDH8/ATP1A3/SLC32A1/PNOC/PTPRN/ADRA2A/KCNA1/CPLX3/VAMP2/EPHA4/UNC13A/CRHBP/NPY/NMU/HSPA8/RAB3A/CHRM1/SLC1A1/TPBG/GRIN1
MF	GO:0016209	antioxidant activity	60	0.4965	1.8759	0.000576242	0.0257376	0.0231702	2247	tags=33%, list=12%, signal=30%	HBG1/HBG2/HBA1/HBA2/S100A9/GSTT1/SRXN1/TXNDC17/PTGS2/HBQ1/GSTA1/TXN/SESN2/TPO/PXDNL/TXNL1/PRDX4/MGST3/GSR/PRDX5
BP	GO:0022029	telencephalon cell migration	48	0.512765	1.8704	0.00125019	0.0456297	0.041078	3111	tags=31%, list=16%, signal=26%	NRG1/FEZF2/SLIT2/CDK5R2/MDGA1/RTN4/CDK5R1/CNTN2/POU3F2/FGF13/PEX13/CDK5/SYNE2/LAMB1/FOXG1
BP	GO:0031279	regulation of cyclase activity	50	0.507687	1.86643	0.000887772	0.0348851	0.0314052	1673	tags=26%, list=9%, signal=24%	ADCYAP1/HPCA/VIPR2/GABBR2/NOS2/GRM2/CALM2/GRM3/EDNRA/CALM3/CAP1/CAP2/RCVRN
CC	GO:0097060	synaptic membrane	287	0.400271	1.86525	4.75114e-08	1.89808e-05	1.70874e-05	1852	tags=25%, list=10%, signal=23%	ATP2B2/ADCY1/RPH3A/ARC/GRIN2A/SYP/IGSF21/NRGN/PRKCG/NTNG1/CDH8/ATP1A3/ADRA2A/SLC1A6/CHRNA2/CNIH3/KCNA1/DLG1/CBLN1/GLRB/GABBR2/STX1A/LRRTM4/CPLX3/KCTD8/LRRTM3/LRRC4C/GABRD/KCNB1/NLGN1/KCNK1/GRM2/DGKI/EPHB2/NRXN1/DDN/EPHA4/UNC13A/GABRA1/GRM3/NPTN/NLGN4Y/CSPG5/PSENEN/HIP1/CACNG3/RGS7BP/SLITRK3/ATP2B1/CNTN1/LRFN4/HSPA8/PI4K2A/SLC16A3/ADAM10/CHRM1/CNTN2/LRFN2/ADAM23/KCTD16/GRIN1/PPP1R9B/KCND2/ATP6AP2/…
CC	GO:0098984	neuron to neuron synapse	291	0.398965	1.86518	1.27532e-08	7.64237e-06	6.88003e-06	3408	tags=34%, list=18%, signal=28%	ATP2B2/ADCY1/DCLK1/ARC/GRIN2A/SLC8A2/PENK/MAL2/LZTS1/NRGN/ATP1A1/PRKCG/ATP1A3/MAP1B/ADRA2A/NETO2/BCL11A/CABP1/DLG1/STX1A/LRRTM3/LRRC4C/HOMER1/RTN4/NLGN1/HOMER2/DGKI/SYT12/EPHA4/GRM3/NPTN/NLGN4Y/CACNG3/RGS7BP/SLITRK3/CDK5R1/LRFN4/CAMK1/LYN/CAMK2N1/NCK2/SLC16A3/SLC30A3/KALRN/ADAM10/CHRM1/HNRNPH2/LRFN2/CAP2/SLC1A1/FABP5/ITPR1/ACTR2/GRIN1/PPP1R9B/GNG3/KCND2/RGS14/EFNB2/SORCS2/PRKAR1B/GSG1L/CLSTN1/KCN…
BP	GO:0061001	regulation of dendritic spine morphogenesis	38	0.539416	1.85702	0.00140348	0.0490541	0.0441609	3408	tags=47%, list=18%, signal=39%	ARC/CUX2/NGEF/STAU2/NLGN1/EPHB2/EPHA4/CDK5R1/CAMK2B/ACTR2/ITPKA/DHX36/DBNL/CDK5/TANC2/UBE3A/PTEN/ABI3
CC	GO:0015934	large ribosomal subunit	106	0.451772	1.84769	3.90844e-05	0.00419487	0.00377642	4893	tags=45%, list=25%, signal=34%	RPL29/MRPL3/RPL36A/RPL26L1/RPL39L/MRPL45/MRPL18/MRPL19/MRPL33/MRPL1/MRPL39/MRPL54/MRPS30/MRPL4/RPL34/RPL41/MRPL36/MRPL40/RPL6/MRPL14/RPL39/MRPL2/RPL28/MRPL21/MRPL28/MRPL15/RPL37A/MPV17L2/RPL27/MRPL9/MRPL12/MRPL47/GADD45GIP1/MRPL37/RPL31/MRPL50/MRPL46/MRPL13/RPL12/RPL8/NSUN3/MRPL51/RPL11/MRPL44/RPL22/MRPL49/MRPL55/MRPL22
MF	GO:0043177	organic acid binding	91	0.459642	1.8399	0.000175962	0.0118256	0.010646	2231	tags=27%, list=11%, signal=24%	HBG1/HBG2/HBA1/CYP26B1/S100A8/HBA2/FABP3/CYP26A1/RARA/S100A9/GLRB/CRABP1/PPARG/NOS2/FOLR2/HBQ1/SLC1A1/FABP5/SESN2/GRIN1/GLDC/GPR143/MTHFS/YARS2/PITPNA
BP	GO:1904062	regulation of cation transmembrane transport	280	0.395556	1.83982	3.75352e-08	1.74465e-05	1.57062e-05	1365	tags=21%, list=7%, signal=20%	RGS4/ARC/KCNG1/CX3CL1/HPCA/GRIN2A/NPPA/TMEM38A/RASGRF1/CRH/SNCA/SLN/FKBP1B/ADRA2A/NETO2/CNIH3/KCNA1/CABP1/DLG1/GLRX/CACNB3/PRKCE/PLP1/FKBP1A/SCN3B/HOMER1/ATP1B1/NLGN1/TREM2/FGF14/RGS7/VAMP2/CALM2/KCNS1/TSPAN13/EPHB2/SCN1B/CXCL10/KCNIP3/FGF11/PPP3CA/CRHBP/COX17/CACNG3/GRP/RAMP3/FXYD5/CASQ1/HECW1/LYN/EDNRA/OPRL1/CALM3/MEF2C/LRRC38/YWHAE/CACNB1/KCNIP1/PPIF/THY1
CC	GO:0099572	postsynaptic specialization	280	0.395355	1.83888	3.88185e-08	1.74465e-05	1.57062e-05	3483	tags=33%, list=18%, signal=28%	ATP2B2/ADCY1/DCLK1/ARC/GRIN2A/SLC8A2/LZTS1/DLGAP4/NRGN/ATP1A1/PRKCG/MAP1B/ADRA2A/NETO2/BCL11A/CABP1/DLG1/STX1A/LRRTM3/LRRC4C/HOMER1/RTN4/NLGN1/HOMER2/DGKI/EPHA4/GRM3/NPTN/NLGN4Y/CACNG3/RGS7BP/SLITRK3/CDK5R1/LRFN4/HSPA8/CAMK1/LYN/CAMK2N1/NCK2/SLC16A3/KALRN/ADAM10/CHRM1/HNRNPH2/LRFN2/CAP2/FABP5/ITPR1/ACTR2/GRIN1/PPP1R9B/GNG3/KCND2/RGS14/GABRA5/EFNB2/SORCS2/GSG1L/CLSTN1/KCND1/DBNL/SH3GL3/DLGAP2/BNIP…
CC	GO:0045211	postsynaptic membrane	200	0.408801	1.83109	1.41061e-06	0.000301857	0.000271746	1852	tags=26%, list=10%, signal=24%	ATP2B2/ADCY1/RPH3A/ARC/GRIN2A/IGSF21/NRGN/ADRA2A/CHRNA2/CNIH3/KCNA1/DLG1/CBLN1/GLRB/GABBR2/LRRTM4/KCTD8/LRRTM3/LRRC4C/GABRD/KCNB1/NLGN1/GRM2/EPHB2/DDN/EPHA4/GABRA1/GRM3/NPTN/NLGN4Y/CSPG5/HIP1/CACNG3/RGS7BP/SLITRK3/CNTN1/LRFN4/HSPA8/SLC16A3/CHRM1/CNTN2/LRFN2/KCTD16/GRIN1/KCND2/ATP6AP2/GABRA5/EFNB2/SORCS2/GSG1L/CLSTN1/PCDH8/KCND1
CC	GO:0099634	postsynaptic specialization membrane	86	0.463684	1.82566	0.000161495	0.0111133	0.0100047	3432	tags=41%, list=18%, signal=34%	ATP2B2/ADCY1/ARC/GRIN2A/ADRA2A/DLG1/LRRTM3/LRRC4C/NLGN1/EPHA4/NPTN/NLGN4Y/CACNG3/RGS7BP/SLITRK3/LRFN4/HSPA8/SLC16A3/CHRM1/LRFN2/KCND2/GABRA5/EFNB2/SORCS2/GSG1L/PRRT1/PRR7/DAGLA/CNIH2/NLGN4X/LRFN5/GRIN3A/SLITRK1/LRFN3/KPNA2
BP	GO:0046928	regulation of neurotransmitter secretion	73	0.472078	1.82156	0.000443501	0.0215487	0.0193992	3147	tags=33%, list=16%, signal=28%	ADCY1/PRKCB/SYP/SNCA/PRKCG/ADRA2A/STX1A/CPLX3/NLGN1/SYT12/CSPG5/ATP2A2/CALM3/MEF2C/RAB3A/KCNMB4/RIMS1/BACE1/CDK5/PFN2/CAMK2A/GRIN3A/SYT4/SYT11
CC	GO:0014069	postsynaptic density	266	0.392333	1.8129	4.22468e-07	0.000104758	9.43078e-05	3408	tags=33%, list=18%, signal=28%	ATP2B2/ADCY1/DCLK1/ARC/GRIN2A/SLC8A2/LZTS1/NRGN/ATP1A1/PRKCG/MAP1B/ADRA2A/NETO2/BCL11A/CABP1/DLG1/STX1A/LRRTM3/LRRC4C/HOMER1/RTN4/NLGN1/HOMER2/DGKI/EPHA4/GRM3/NPTN/NLGN4Y/CACNG3/RGS7BP/SLITRK3/CDK5R1/LRFN4/CAMK1/LYN/CAMK2N1/NCK2/SLC16A3/KALRN/ADAM10/CHRM1/HNRNPH2/LRFN2/CAP2/FABP5/ITPR1/ACTR2/GRIN1/PPP1R9B/GNG3/KCND2/RGS14/EFNB2/SORCS2/GSG1L/CLSTN1/KCND1/DBNL/SH3GL3/DLGAP2/BNIP3/BAALC/RNF112/PRRT1…
BP	GO:0051963	regulation of synapse assembly	76	0.467204	1.80903	0.000228586	0.013698	0.0123316	3408	tags=42%, list=18%, signal=35%	CBLN2/CUX2/SNCA/ST8SIA2/CBLN1/SLITRK5/STAU2/AGRN/LRRTM3/MDGA1/NLGN1/SLITRK4/EPHB2/NRXN1/LRRN3/SLITRK3/LRFN4/EPHB1/MEF2C/TPBG/BDNF/EPHB3/CLSTN1/LHFPL4/SETD5/GPC6/GHRL/LRFN5/LRTM2/SLITRK1/LRFN3/ABI3
MF	GO:0003735	structural constituent of ribosome	155	0.416634	1.80773	1.36936e-05	0.00179038	0.00161179	6037	tags=51%, list=31%, signal=35%	RPS4Y1/RPL29/MRPL3/RPL36A/RPL26L1/MRPS23/RPL39L/MRPL18/MRPS35/MRPL19/MRPL33/ISG15/MRPL1/MRPS18C/MRPS12/MRPL54/RPS21/MRPS30/MRPS17/MRPL4/MRPS33/RPS7/RPL34/RPL41/MRPL36/RPL6/MRPL14/RPL39/RPS27L/MRPL2/MRPS24/RPL28/MRPL21/MRPL28/MRPL15/RPL37A/MRPS21/RPL27/MRPL9/MRPL12/NDUFA7/MRPL47/MRPL37/RPL31/RPS20/RSL24D1/MRPL46/MRPL13/RPS13/RPS5/MRPS18B/RPL12/RPL8/RPS3/RPS15A/RPS25/MRPL51/RPL11/MRPL44/RPL22/MRPL4…
CC	GO:0032279	asymmetric synapse	270	0.389909	1.80728	1.17794e-07	3.79881e-05	3.41988e-05	3408	tags=33%, list=18%, signal=28%	ATP2B2/ADCY1/DCLK1/ARC/GRIN2A/SLC8A2/LZTS1/NRGN/ATP1A1/PRKCG/MAP1B/ADRA2A/NETO2/BCL11A/CABP1/DLG1/STX1A/LRRTM3/LRRC4C/HOMER1/RTN4/NLGN1/HOMER2/DGKI/EPHA4/GRM3/NPTN/NLGN4Y/CACNG3/RGS7BP/SLITRK3/CDK5R1/LRFN4/CAMK1/LYN/CAMK2N1/NCK2/SLC16A3/KALRN/ADAM10/CHRM1/HNRNPH2/LRFN2/CAP2/SLC1A1/FABP5/ITPR1/ACTR2/GRIN1/PPP1R9B/GNG3/KCND2/RGS14/EFNB2/SORCS2/GSG1L/CLSTN1/KCND1/DBNL/SH3GL3/DLGAP2/BNIP3/BAALC/RNF11…
CC	GO:0097447	dendritic tree	474	0.365182	1.80659	4.8525e-10	4.36179e-07	3.9267e-07	2560	tags=25%, list=13%, signal=22%	RIT2/ATP2B2/PCSK1/RPH3A/ARC/HPCA/KIF21B/GRIN2A/SLC8A2/PENK/LZTS1/NRGN/PRKCG/ATP1A3/MAP1B/SLC32A1/PNOC/RARA/CNIH3/KCNA1/FAT3/L1CAM/GLRB/ASAP1/STAU2/RTN1/SLA/HOMER1/GABRD/KCNB1/LPAR1/APOD/NLGN1/HOMER2/KCNK1/GRM2/TUBB3/DGKI/EPHB2/ZNF804A/FRMPD4/DDN/EPHA5/PPP3CA/EPHA4/GABRA1/GRM3/NPTN/CRHBP/CACNG3/RGS7BP/ATP2B1/KIF3B/OSBP2/CDK5R1/HSPA8/CYBB/KCNB2/EPHB1/CAMK2N1/PI4K2A/SEMA3A/DPYSL5/IGF2BP1/STRN4/CYP46…
BP	GO:0008277	regulation of G protein-coupled receptor signaling pathway	97	0.444736	1.80033	0.000191493	0.0123482	0.0111165	2004	tags=30%, list=10%, signal=27%	ADCYAP1/RGS4/SYP/STMN1/PLCB1/CHGA/SNCA/KCTD8/HOMER2/RGS7/MGRN1/RGS6/MGLL/MRAP2/GRP/RAMP3/MET/OPRL1/GNG4/CNTN2/SLC39A14/KLK6/KCTD16/PPP1R9B/RGS14/CCL5/ARRB1/ZDHHC3/GNG7
CC	GO:0042734	presynaptic membrane	115	0.432087	1.79844	6.48261e-05	0.00595113	0.00535749	1835	tags=27%, list=9%, signal=25%	ATP2B2/GRIN2A/SYP/IGSF21/NTNG1/ATP1A3/ADRA2A/SLC1A6/KCNA1/STX1A/CPLX3/KCTD8/GRM2/EPHB2/NRXN1/EPHA4/UNC13A/GRM3/NPTN/PSENEN/HIP1/RGS7BP/ATP2B1/CNTN1/PI4K2A/CHRM1/ADAM23/KCTD16/GABRA5/EFNB2/PCDH8
CC	GO:0098685	Schaffer collateral - CA1 synapse	64	0.469276	1.79576	0.00131111	0.0469096	0.0422303	3881	tags=44%, list=20%, signal=35%	ADCY1/SYP/NTNG1/LRRC4C/TUBB2B/PPP3CA/EPHA4/NPTN/CACNG3/CHRM1/LRFN2/NEFL/ITPR1/EFNB2/PRKAR1B/GSG1L/CDK5/PRKCI/PFN2/ACTB/GHRL/NEFH/INA/ACTG1/NTNG2/GRM5/BAIAP2/CPLX1
MF	GO:0140104	molecular carrier activity	62	0.471225	1.79137	0.00140525	0.0490541	0.0441609	3778	tags=35%, list=19%, signal=29%	HBG1/HBG2/NGB/HBA1/HBA2/XPO7/TF/COX17/HBQ1/HSPA8/NDUFAB1/KPNA3/RAN/HBB/NUP214/KPNA6/IPO4/HBD/KPNA2/RANBP6/CLU/SNUPN
CC	GO:0098798	mitochondrial protein-containing complex	223	0.39494	1.79082	1.59803e-06	0.000328326	0.000295575	4893	tags=45%, list=25%, signal=34%	COX7B/SLC25A4/NDUFB3/COX6B1/MRPL3/COX7A2/NDUFA12/NDUFA1/MRPS23/MRPL45/NDUFB6/MRPL18/TOMM20/MRPS35/MRPL19/MRPL33/NDUFV2/MRPL1/PPIF/MRPS18C/MRPL39/MRPS12/MRPL54/NDUFB2/NDUFAB1/COX6C/COX5A/DLAT/NDUFB4/UQCRH/TOMM6/TOMM5/NDUFS5/TIMM23/MRPS30/COX7C/MRPS27/MRPS36/UQCRHL/MRPS17/NDUFA2/NDUFS4/IDH3B/TOMM40L/MRPL4/MRPS33/MRPL36/COX8A/MRPL40/MRPL14/CHCHD10/TIMM17A/MRPL2/MRPS24/MRPL21/MRPL28/MRPL15/UQCRC2/CYC…
CC	GO:0099056	integral component of presynaptic membrane	52	0.485286	1.78707	0.00125659	0.0456297	0.041078	1712	tags=31%, list=9%, signal=28%	ATP2B2/ATP1A3/ADRA2A/SLC1A6/KCNA1/STX1A/EPHB2/EPHA4/GRM3/NPTN/PSENEN/ATP2B1/CHRM1/ADAM23/GABRA5/EFNB2
BP	GO:0097061	dendritic spine organization	71	0.463896	1.78679	0.00056272	0.025325	0.0227988	2664	tags=32%, list=14%, signal=28%	ARC/CUX2/NGEF/STAU2/HOMER1/NLGN1/TREM2/LGMN/EPHB2/ZNF804A/EPHA4/CDK5R1/EPHB1/CAMK2B/ACTR2/CDC42/EPHB3/ITPKA/DHX36/DBNL/CDK5/TANC2/UBE3A
BP	GO:0098869	cellular oxidant detoxification	67	0.466975	1.77973	0.000806423	0.0322166	0.0290029	2247	tags=30%, list=12%, signal=26%	HBG1/HBG2/HBA1/HBA2/S100A9/GSTT1/SRXN1/TXNDC17/PTGS2/HBQ1/GSTA1/TXN/SESN2/TPO/PXDNL/TXNL1/PRDX4/MGST3/GSR/PRDX5
CC	GO:0030425	dendrite	472	0.359169	1.77782	1.59476e-09	1.14679e-06	1.0324e-06	2560	tags=25%, list=13%, signal=22%	ATP2B2/PCSK1/RPH3A/ARC/HPCA/KIF21B/GRIN2A/SLC8A2/PENK/LZTS1/NRGN/PRKCG/ATP1A3/MAP1B/SLC32A1/PNOC/RARA/CNIH3/KCNA1/FAT3/L1CAM/GLRB/ASAP1/STAU2/RTN1/SLA/HOMER1/GABRD/KCNB1/LPAR1/APOD/NLGN1/HOMER2/KCNK1/GRM2/TUBB3/DGKI/EPHB2/ZNF804A/FRMPD4/DDN/EPHA5/PPP3CA/EPHA4/GABRA1/GRM3/NPTN/CRHBP/CACNG3/RGS7BP/ATP2B1/KIF3B/OSBP2/CDK5R1/HSPA8/CYBB/KCNB2/EPHB1/CAMK2N1/PI4K2A/SEMA3A/DPYSL5/IGF2BP1/STRN4/CYP46A1/RT…
BP	GO:1903305	regulation of regulated secretory pathway	116	0.427484	1.77507	0.000186944	0.0123332	0.0111029	3256	tags=32%, list=17%, signal=27%	ADCY1/RPH3A/PRKCB/SYP/PRKCG/ADRA2A/CDK5R2/STX1A/CACNA1G/KCNB1/NLGN1/NCKAP1L/SYT12/SYT13/CSPG5/RAB15/ATP2A2/LYN/IL4R/CALM3/PTAFR/RAB3A/ZP3/VAMP8/HYAL3/SYT5/SYT6/BACE1/CDK5/PFN2/AP1G1/CACNA1I/STXBP2/GRIN3A/SYT4/SYT11/HMOX1
BP	GO:0060996	dendritic spine development	80	0.451798	1.77498	0.000367567	0.0190156	0.0171188	3105	tags=38%, list=16%, signal=32%	ARC/CUX2/NGEF/ASAP1/STAU2/LPAR1/NLGN1/EPHB2/EPHA4/CDK5R1/CAMK1/EPHB1/NCK2/CAMK2B/MEF2C/UBA6/ACTR2/CDC42/EPHB3/ITPKA/DHX36/DBNL/CDK5/TANC2/UBE3A/ARF4/MAPK6/CAMK2A/GRIN3A/PTEN
CC	GO:0030672	synaptic vesicle membrane	96	0.438599	1.76974	0.000194041	0.0123482	0.0111165	3399	tags=40%, list=18%, signal=33%	RPH3A/SYP/TMEM163/MAL2/SNCA/SLC32A1/SVOP/STX1A/SLC6A17/CPLX3/VAMP2/DGKI/SYT12/UNC13A/SYNGR3/ATP2B1/CALM3/RAB3A/STX6/SLC30A3/PTPRN2/ATP6AP2/SYT5/STX10/SYT6/ATP6V1G2/RAB3C/PRRT1/RAB35/GAD2/CLTA/SYT4/SYPL1/STX12/BCL2L1/ATP6V1E1/SLC6A9/SLC17A7
CC	GO:0099501	exocytic vesicle membrane	96	0.438599	1.76974	0.000194041	0.0123482	0.0111165	3399	tags=40%, list=18%, signal=33%	RPH3A/SYP/TMEM163/MAL2/SNCA/SLC32A1/SVOP/STX1A/SLC6A17/CPLX3/VAMP2/DGKI/SYT12/UNC13A/SYNGR3/ATP2B1/CALM3/RAB3A/STX6/SLC30A3/PTPRN2/ATP6AP2/SYT5/STX10/SYT6/ATP6V1G2/RAB3C/PRRT1/RAB35/GAD2/CLTA/SYT4/SYPL1/STX12/BCL2L1/ATP6V1E1/SLC6A9/SLC17A7
BP	GO:0061337	cardiac conduction	72	0.457551	1.7679	0.000544439	0.0249456	0.0224572	1235	tags=22%, list=6%, signal=21%	TNNI3K/ATP2B2/SLC8A2/ATP1A1/FKBP1B/ATP1A3/SCN3B/CACNA1G/ATP1B1/CALM2/SCN1B/ATP2B1/ATP2A2/CALM3/YWHAE/CXADR
CC	GO:0098800	inner mitochondrial membrane protein complex	96	0.436674	1.76197	0.000211567	0.0130032	0.0117061	4433	tags=45%, list=23%, signal=35%	COX7B/NDUFB3/COX6B1/COX7A2/NDUFA12/NDUFA1/NDUFB6/NDUFV2/NDUFB2/NDUFAB1/COX6C/COX5A/NDUFB4/UQCRH/NDUFS5/TIMM23/COX7C/UQCRHL/NDUFA2/NDUFS4/COX8A/CHCHD10/TIMM17A/UQCRC2/CYC1/UQCRB/NDUFA8/NDUFA4/DNAJC11/CHCHD6/UQCRQ/NDUFA7/SDHD/IMMT/NDUFAF1/NDUFA6/MTX1/UQCRC1/UQCRFS1/NDUFB11/DNAJC15/APOO/GRPEL2
BP	GO:0031644	regulation of nervous system process	105	0.427938	1.75473	0.000288078	0.0160587	0.0144568	3341	tags=37%, list=17%, signal=31%	CARTPT/ZNF488/RGS4/GRIN2A/SLC8A2/CUX2/DLGAP4/NPTXR/TMEM25/CBLN1/NPTX2/EGR2/STX1A/HOMER1/NLGN1/MAG/NRXN1/TPPP/MGLL/OPRL1/PTAFR/FABP5/GRIN1/PRKAR1B/BEGAIN/JAM2/RIMS1/DLGAP2/DLGAP1/GHRL/CNIH2/FGF12/SLC8A3/NLGN4X/ZFHX2/PTEN/HTR2C/TMEM108/TNFRSF1B
BP	GO:0034765	regulation of ion transmembrane transport	363	0.366798	1.75431	4.37551e-08	1.85084e-05	1.66622e-05	1853	tags=22%, list=10%, signal=20%	KCNH4/RGS4/ARC/KCNG1/CX3CL1/HPCA/GRIN2A/NPPA/TMEM38A/RASGRF1/KCNF1/KCNV1/CRH/SNCA/SLN/FKBP1B/ADRA2A/NETO2/CNIH3/KCNA1/CABP1/DLG1/GLRX/CACNB3/PRKCE/PLP1/FKBP1A/SCN3B/HOMER1/CACNA1G/KCNB1/ATP1B1/NLGN1/TREM2/FGF14/RGS7/VAMP2/CALM2/KCNS1/TSPAN13/EPHB2/SCN1B/CXCL10/KCNIP3/FGF11/PPP3CA/CRHBP/COX17/CACNG3/GRP/RAMP3/FXYD5/CASQ1/HECW1/CYBB/KCNB2/LYN/EDNRA/OPRL1/CALM3/MEF2C/LRRC38/YWHAE/KCNQ3/PTAFR/CACNB1/…
BP	GO:0048678	response to axon injury	70	0.457343	1.7537	0.000731656	0.0305255	0.0274806	1491	tags=23%, list=8%, signal=21%	SPP1/PCSK1/FKBP1B/MAP1B/KCNB1/APOD/TREM2/MAG/RTN4RL1/EPHA4/CSPG5/LYN/RTN4RL2/THY1/NEFL/SLC1A1
BP	GO:0010469	regulation of signaling receptor activity	123	0.417969	1.74749	0.000110449	0.00872789	0.00785727	2779	tags=30%, list=14%, signal=26%	ARC/RASGRF1/DLGAP4/CRH/ADRA2A/NETO2/NPTXR/CNIH3/NPTX2/GREM1/HOMER1/NLGN1/PPARG/LDOC1/LY6E/EPHB2/CRHBP/CACNG3/RAMP3/NCK2/RWDD1/MEF2C/VPS25/NCOA3/LYPD6/RASGRF2/BEGAIN/GSG1L/WFIKKN2/PDE4D/DLGAP2/PRRT1/DLGAP1/CNRIP1/PRKCD/CNIH2/IFNGR2
BP	GO:0106027	neuron projection organization	78	0.44544	1.73741	0.00110058	0.0410064	0.0369159	2664	tags=31%, list=14%, signal=27%	ARC/CUX2/NGEF/ATP1A3/STAU2/HOMER1/NLGN1/TREM2/LGMN/EPHB2/ZNF804A/EPHA4/CDK5R1/EPHB1/CAMK2B/ACTR2/CDC42/EPHB3/ITPKA/DHX36/DBNL/CDK5/TANC2/UBE3A
BP	GO:0007416	synapse assembly	141	0.406545	1.73665	0.000141801	0.0101969	0.00917972	3408	tags=36%, list=18%, signal=30%	CBLN2/CUX2/SNCA/MAP1B/NRG1/ST8SIA2/CBLN1/SLITRK5/SDCBP/STAU2/AGRN/SLC25A46/LRRTM3/MDGA1/NLGN1/SLITRK4/EPHB2/LGI2/NRXN1/LRRN3/GABRA1/NPTN/NLGN4Y/HAPLN4/SLITRK3/LRFN4/EPHB1/MEF2C/TPBG/BDNF/EFNB2/EPHB3/CLSTN1/NRXN2/DBNL/FGF13/PLXND1/CDK5/LHFPL4/SETD5/GPC6/GHRL/CBLN4/NLGN4X/LRFN5/PTEN/MECP2/LRTM2/SLITRK1/LRFN3/ABI3
CC	GO:0008021	synaptic vesicle	170	0.395943	1.73538	2.45337e-05	0.00275659	0.00248162	3399	tags=33%, list=18%, signal=27%	RPH3A/GRIN2A/MFF/SYP/TMEM163/PENK/MAL2/SNCA/SLC32A1/SVOP/STX1A/SLC6A17/CPLX3/VAMP2/DGKI/SYT12/UNC13A/CLCN4/COPS5/SYNGR3/ATP2B1/RAB15/CALM3/RAB3A/STX6/SLC30A3/VTI1B/PTPRN2/GRIN1/COPS4/RAB40C/BDNF/ATP6AP2/SYT5/STX10/SYT6/ATP6V1G2/RAB3C/BACE1/RNF112/PRRT1/RAB35/STX7/GAD2/CLTA/SYT4/SYPL1/STX12/SYT11/ATP6V0D1/BCL2L1/NTF3/ATP6V1E1/TRIM9/SLC6A9/SLC17A7
CC	GO:0030427	site of polarized growth	149	0.404063	1.73047	6.58289e-05	0.00595113	0.00535749	2113	tags=26%, list=11%, signal=24%	STMN2/KIF21B/TSHZ3/RASGRF1/NGEF/SNCA/GDPD5/MAP1B/L1CAM/CDK5R2/OLFM1/TUBB3/BASP1/CRMP1/ZNF804A/EPHA4/STMN4/CDK5R1/GPRIN1/TIAM2/PI4K2A/CALM3/IGF2BP1/CXADR/FSCN1/THY1/TRPV2/MYO5A/NEFL/MAPT/EXOC6/PPP1R9B/STMN3/NRSN1/DBNL/FGF13/ARPC5/LMTK2/FEZ1
CC	GO:0030426	growth cone	144	0.403294	1.72611	8.20134e-05	0.00692477	0.00623401	2113	tags=26%, list=11%, signal=23%	STMN2/KIF21B/TSHZ3/RASGRF1/NGEF/SNCA/GDPD5/MAP1B/L1CAM/CDK5R2/OLFM1/TUBB3/BASP1/CRMP1/ZNF804A/EPHA4/STMN4/CDK5R1/GPRIN1/TIAM2/CALM3/IGF2BP1/CXADR/FSCN1/THY1/TRPV2/MYO5A/NEFL/MAPT/EXOC6/PPP1R9B/STMN3/NRSN1/FGF13/ARPC5/LMTK2/FEZ1
BP	GO:0034762	regulation of transmembrane transport	426	0.352536	1.72238	7.04131e-08	2.5317e-05	2.27916e-05	2679	tags=25%, list=14%, signal=22%	KCNH4/RGS4/PRKCB/ARC/KCNG1/CX3CL1/HPCA/GRIN2A/NPPA/TMEM38A/RASGRF1/RTN2/KCNF1/KCNV1/CRH/SNCA/SLN/FKBP1B/ADRA2A/NETO2/CNIH3/KCNA1/OPN3/CABP1/DLG1/GLRX/CACNB3/PRKCE/PLP1/FKBP1A/SCN3B/HOMER1/AZIN1/CACNA1G/KCNB1/ATP1B1/NLGN1/TREM2/FGF14/RGS7/VAMP2/CALM2/KCNS1/TSPAN13/IRS1/EPHB2/SCN1B/CXCL10/KCNIP3/FGF11/PPP3CA/CRHBP/COX17/CACNG3/GRP/RAMP3/FXYD5/THBS1/CASQ1/HECW1/CYBB/KCNB2/LYN/EDNRA/OPRL1/CALM3/MEF2C…
BP	GO:1901379	regulation of potassium ion transmembrane transport	74	0.44564	1.71964	0.000903214	0.035299	0.0317778	1273	tags=22%, list=7%, signal=20%	RGS4/KCNG1/NPPA/NETO2/KCNA1/DLG1/ATP1B1/TREM2/RGS7/VAMP2/KCNS1/KCNIP3/GRP/LRRC38/YWHAE/KCNIP1
BP	GO:0016079	synaptic vesicle exocytosis	94	0.425793	1.71519	0.000990521	0.0372924	0.0335724	2423	tags=27%, list=12%, signal=23%	ADCY1/PRKCB/SYP/SNCA/PRKCG/ADRA2A/CADPS2/STX1A/CPLX3/NLGN1/PIP5K1C/VAMP2/SYT12/UNC13A/CSPG5/ATP2A2/CALM3/RAB3A/SYT5/NAPA/RIMS1/BACE1/SNAP29/CDK5/PFN2
BP	GO:0010976	positive regulation of neuron projection development	127	0.408122	1.71438	0.000238328	0.014077	0.0126728	2765	tags=28%, list=14%, signal=24%	RIT2/STMN2/CX3CL1/SERPINI1/CUX2/FKBP1B/S100A9/STAU2/NLGN1/TUBB2B/EPHB2/SCN1B/ZNF804A/NPTN/CNTN1/FUT9/CAMK1/LYN/CAMK2B/HSPA5/ACTR2/BDNF/ITPKA/GPC2/DHX36/DBNL/FEZ1/KIDINS220/PRKCI/TOX/ENC1/ANKRD27/VLDLR/ELAVL4/SNX3
CC	GO:0098793	presynapse	409	0.350474	1.70808	1.65534e-07	4.76142e-05	4.28646e-05	2423	tags=25%, list=12%, signal=22%	ATP2B2/PCSK1/RPH3A/PRKCB/GRIN2A/MFF/SYP/TMEM163/IGSF21/SLC8A2/PENK/MAL2/SNCA/PRKCG/NTNG1/CDH8/ATP1A3/SLC32A1/PNOC/PTPRN/ADRA2A/SLC1A6/KCNA1/CADPS2/SVOP/STX1A/SLC6A17/CPLX3/KCTD8/NLGN1/PIP5K1C/SLC29A1/VAMP2/GRM2/DGKI/EPHB2/SYT12/NRXN1/ZNF804A/EPHA4/UNC13A/GRM3/NPTN/NLGN4Y/CLCN4/CRHBP/PSENEN/HIP1/COPS5/NPY/SYNGR3/RGS7BP/ATP2B1/CNTN1/RAB15/CDK5R1/NMU/HSPA8/PI4K2A/CALM3/CYP46A1/RAB3A/STX6/SLC30A3/CHR…
BP	GO:0006119	oxidative phosphorylation	90	0.425313	1.69489	0.000502357	0.0237661	0.0213954	4393	tags=46%, list=23%, signal=35%	SNCA/COX7B/NDUFB3/COX6B1/COX7A2/NDUFA12/NDUFA1/NDUFB6/NDUFV2/PPIF/NDUFB2/NDUFAB1/COX6C/COX5A/CYCS/NDUFB4/UQCRH/NDUFS5/BID/COX7C/UQCRHL/NDUFA2/NDUFS4/PDE12/COX8A/CHCHD10/CHCHD2/UQCRC2/CYC1/UQCRB/NDUFA8/NDUFA4/UQCRQ/NDUFA7/SDHD/NDUFAF1/NDUFA6/UQCRC1/UQCRFS1/NDUFB11/DNAJC15
CC	GO:0070382	exocytic vesicle	185	0.380284	1.69276	8.28161e-05	0.00692477	0.00623401	3399	tags=32%, list=18%, signal=27%	RPH3A/GRIN2A/MFF/SYP/TMEM163/PENK/MAL2/SNCA/SLC32A1/SVOP/STX1A/SLC6A17/CPLX3/VAMP2/DGKI/SYT12/UNC13A/SYT13/CLCN4/COPS5/SYNGR3/ATP2B1/RAB15/CALM3/RAB3A/STX6/SLC30A3/VTI1B/PTPRN2/GRIN1/COPS4/RAB40C/BDNF/ATP6AP2/SYT5/STX10/SYT6/ATP6V1G2/RAB3C/BACE1/RNF112/PRRT1/SYTL4/RAB35/STX7/GAD2/CLTA/SYT4/SYPL1/STX12/RAB6A/SYT11/ATP6V0D1/BCL2L1/NTF3/ATP6V1E1/TRIM9/SLC6A9/SLC17A7
BP	GO:0007269	neurotransmitter secretion	125	0.402137	1.68256	0.000362818	0.0190156	0.0171188	2423	tags=26%, list=12%, signal=23%	ADCY1/RPH3A/PRKCB/SYP/SNCA/PRKCG/SLC32A1/ADRA2A/CADPS2/STX1A/CPLX3/NLGN1/PIP5K1C/VAMP2/SYT12/NRXN1/UNC13A/CSPG5/ATP2A2/CALM3/MEF2C/RAB3A/KCNMB4/GRM4/PTPRN2/NRXN2/SYT5/NAPA/RIMS1/BACE1/SNAP29/CDK5/PFN2
BP	GO:0099643	signal release from synapse	125	0.402137	1.68256	0.000362818	0.0190156	0.0171188	2423	tags=26%, list=12%, signal=23%	ADCY1/RPH3A/PRKCB/SYP/SNCA/PRKCG/SLC32A1/ADRA2A/CADPS2/STX1A/CPLX3/NLGN1/PIP5K1C/VAMP2/SYT12/NRXN1/UNC13A/CSPG5/ATP2A2/CALM3/MEF2C/RAB3A/KCNMB4/GRM4/PTPRN2/NRXN2/SYT5/NAPA/RIMS1/BACE1/SNAP29/CDK5/PFN2
BP	GO:0071805	potassium ion transmembrane transport	163	0.384845	1.67877	0.00011516	0.00881526	0.00793592	1852	tags=22%, list=10%, signal=20%	KCNH4/RGS4/KCNG1/NPPA/TMEM38A/KCNF1/KCNV1/ATP1A1/ATP1A3/NETO2/KCNA1/DLG1/KCNB1/ATP1B1/TREM2/KCNT2/KCNK1/RGS7/VAMP2/KCNS1/KCNIP3/GRP/PKD2L1/KCNB2/LRRC38/YWHAE/KCNQ3/KCNJ16/KCNIP1/KCNMB4/KCNJ12/SLC9A4/KCND2/AKAP6/HCN1/KCND1
BP	GO:0043266	regulation of potassium ion transport	86	0.42538	1.67484	0.0013112	0.0469096	0.0422303	1273	tags=20%, list=7%, signal=19%	RGS4/KCNG1/NPPA/ADRA2A/NETO2/KCNA1/DLG1/ATP1B1/TREM2/RGS7/VAMP2/KCNS1/KCNIP3/GRP/LRRC38/YWHAE/KCNIP1
BP	GO:0017157	regulation of exocytosis	174	0.380088	1.67158	0.000131532	0.00971491	0.00874583	2551	tags=25%, list=13%, signal=22%	ADCY1/RPH3A/PRKCB/SYP/SNCA/PRKCG/ANXA1/ADRA2A/CADPS2/SMPD3/CDK5R2/SDCBP/STX1A/CACNA1G/KCNB1/NLGN1/NCKAP1L/VAMP2/SYT12/SYT13/CSPG5/RAB15/ATP2A2/LYN/IL4R/CALM3/PTAFR/STAM/EXPH5/RAB3A/ZP3/VAMP8/HYAL3/RALA/SYT5/SYT6/RAB3C/BACE1/SYTL4/CDK5/PFN2/AP1G1/CACNA1I
CC	GO:1902495	transmembrane transporter complex	258	0.364364	1.6697	9.55346e-06	0.00134913	0.00121455	3651	tags=33%, list=19%, signal=27%	KCNH4/KCNG1/GRIN2A/KCNF1/KCNV1/ATP1A1/FKBP1B/ATP1A3/CHRNA2/OLFM3/CNIH3/KCNA1/GLRB/CACNB3/FKBP1A/SCN3B/CACNA1G/GABRD/KCNB1/ATP1B1/KCNK1/NDUFB3/CALM2/NDUFA12/KCNS1/DLG3/SCN1B/OLFM2/NDUFA1/KCNIP3/GABRA1/OSTM1/CACNG3/NDUFB6/PKD2L1/KCNB2/CALM3/LRRC38/KCNQ3/CACNB1/KCNJ16/KCNIP1/NDUFV2/KCNMB4/GRIN1/NDUFB2/NDUFAB1/KCND2/GABRA5/NDUFB4/UQCRH/AKAP6/HCN1/NDUFS5/KCND1/UQCRHL/NDUFA2/NDUFS4/CACNA1A/KCNS2/PDE4D/…
BP	GO:0008037	cell recognition	96	0.412076	1.66272	0.000945673	0.0357912	0.032221	1738	tags=22%, list=9%, signal=20%	PLA2G5/CD9/FEZF2/VSTM2L/DLG1/RTN4/TREM2/BSG/EPHB2/EPHA4/CNTN4/NPTN/FOLR2/CDK5R1/EPHB1/NCK2/ZP3/CNTN2/TCP1/PCDH12/EPHB3
CC	GO:1990351	transporter complex	277	0.355353	1.65134	6.47628e-06	0.00108207	0.00097413	3651	tags=33%, list=19%, signal=27%	KCNH4/KCNG1/GRIN2A/KCNF1/KCNV1/ATP1A1/FKBP1B/ATP1A3/CHRNA2/OLFM3/CNIH3/KCNA1/GLRB/CACNB3/FKBP1A/SCN3B/CACNA1G/GABRD/KCNB1/ATP1B1/KCNK1/NDUFB3/CALM2/NDUFA12/KCNS1/DLG3/SCN1B/OLFM2/NDUFA1/KCNIP3/GABRA1/OSTM1/CACNG3/NDUFB6/PKD2L1/KCNB2/CALM3/LRRC38/KCNQ3/CACNB1/KCNJ16/KCNIP1/NDUFV2/KCNMB4/GRIN1/NDUFB2/NDUFAB1/KCND2/GABRA5/NDUFB4/UQCRH/AKAP6/HCN1/NDUFS5/KCND1/PEX14/UQCRHL/NDUFA2/NDUFS4/CACNA1A/ERGIC2…
BP	GO:0140053	mitochondrial gene expression	141	0.384872	1.64407	0.000646389	0.0280011	0.0252079	4961	tags=46%, list=26%, signal=35%	MRPL3/MRPS23/MRPL45/MRPL18/WARS2/MRPS35/MRPL19/MRPL33/MRPL1/RPUSD3/MRPS18C/MRPL39/MRPS12/MRPL54/TSFM/MRPS30/MRPS27/MRPS17/EARS2/MRPL4/YARS2/MRPS33/MRPL36/MRPL40/MRPL14/CHCHD10/FASTKD1/MRPL2/TRNT1/PPARGC1B/MRPS24/MRPL21/MRPL28/MRPL15/MTIF3/QRSL1/GATC/MPV17L2/MRPS21/C1QBP/MRPL9/MRPL12/NDUFA7/MRPL47/TFB2M/GADD45GIP1/MRPL37/MRPL50/MRPL46/CHCHD1/MRPL13/IARS2/MRPS28/MRPS18B/RPUSD4/NSUN3/RMND1/MRPL51/FA…
BP	GO:0010959	regulation of metal ion transport	296	0.351508	1.64398	6.62092e-06	0.00108207	0.00097413	2679	tags=26%, list=14%, signal=23%	RGS4/KCNG1/CX3CL1/HPCA/NPPA/TMEM38A/SNCA/SLN/ATP1A1/FKBP1B/ADRA2A/NETO2/KCNA1/CABP1/DLG1/GLRX/CACNB3/PRKCE/PLP1/FKBP1A/SCN3B/HOMER1/ATP1B1/TREM2/HOMER2/FGF14/TF/RGS7/VAMP2/CALM2/KCNS1/LILRA2/TSPAN13/SCN1B/CXCL10/KCNIP3/FGF11/PPP3CA/PTGS2/NKAIN2/GRP/RAMP3/FXYD5/CASQ1/ATP2B1/CNTN1/HECW1/STC1/LYN/OPRL1/CAMK2B/PACSIN3/CALM3/LRRC38/YWHAE/CACNB1/KCNIP1/THY1/TRPV2/GRIN1/RCVRN/CCL5/AKAP6/PER1/FGF13/KCNS2…
BP	GO:0006813	potassium ion transport	181	0.369945	1.63821	0.000193081	0.0123482	0.0111165	1852	tags=20%, list=10%, signal=19%	KCNH4/RGS4/KCNG1/NPPA/TMEM38A/KCNF1/KCNV1/ATP1A1/ATP1A3/ADRA2A/NETO2/KCNA1/DLG1/KCNB1/ATP1B1/TREM2/KCNT2/KCNK1/RGS7/VAMP2/KCNS1/KCNIP3/GRP/PKD2L1/KCNB2/LRRC38/YWHAE/KCNQ3/KCNJ16/KCNIP1/KCNMB4/KCNJ12/SLC9A4/KCND2/AKAP6/HCN1/KCND1
BP	GO:0006937	regulation of muscle contraction	112	0.396048	1.63705	0.000931642	0.0357747	0.0322061	3317	tags=32%, list=17%, signal=27%	TNNI3K/NPPA/TMEM38A/CHGA/ATP1A1/FKBP1B/ADRA2A/KCNA1/DLG1/ANXA6/ATP1B1/CALM2/PTGS2/CASQ1/ATP2B1/ATP2A2/NMU/KCNB2/STC1/CALM3/PTAFR/CACNB1/SMAD7/NPNT/FGF13/PDE4D/MYL9/GHRL/ORMDL3/PIK3CG/SLC8A3/HSP90AA1/RGS2/MYL3/SETD3/KCNJ2
CC	GO:0005840	ribosome	203	0.364556	1.6347	9.23456e-05	0.00763284	0.00687145	5741	tags=47%, list=30%, signal=33%	RPS4Y1/HBA1/HBA2/APOD/RPL29/MRPL3/RPL36A/RPL26L1/MRPS23/RPL39L/MRPL45/MRPL18/MRPS35/MRPL19/MRPL33/ISG15/MRPL1/MRPS18C/MRPL39/MRPS12/MRPL54/RPS21/MRPS30/MRPS27/MRPS17/MRPL4/MRPS33/RPS7/RPL34/RPL41/MRPL36/MRPL40/RPL6/MRPL14/RPL39/RPS27L/MRPL2/MRPS24/RPL28/MRPL21/MRPL28/ELAVL4/MRPL15/RPL37A/MPV17L2/MRPS21/RPL27/MRPL9/MRPL12/BTF3/NDUFA7/MRPL47/GADD45GIP1/MRPL37/RPL31/RPS6KL1/RPS20/EIF3H/MRPL50/RSL24D…
BP	GO:0009060	aerobic respiration	129	0.38562	1.62564	0.000471757	0.0227678	0.0204967	4450	tags=42%, list=23%, signal=32%	SNCA/SUCLA2/COX7B/NDUFB3/COX6B1/COX7A2/NDUFA12/MDH1/NDUFA1/NNT/NDUFB6/COX10/NDUFV2/PPIF/NDUFB2/NDUFAB1/COX6C/COX5A/DLAT/CYCS/NDUFB4/UQCRH/NDUFS5/BID/COX7C/MRPS36/UQCRHL/NDUFA2/NDUFS4/IDH3B/DLST/MTFR1/PDE12/BNIP3/COX8A/CHCHD10/CHCHD2/UQCRC2/CYC1/UQCRB/NDUFA8/NDUFA4/HIF1A/UQCRQ/NDUFA7/SDHD/NDUFAF1/NDUFA6/IDH1/UQCRC1/UQCRFS1/NDUFB11/DNAJC15/CS
BP	GO:0044057	regulation of system process	397	0.333142	1.61484	1.91217e-06	0.000381955	0.000343854	3341	tags=28%, list=17%, signal=23%	TNNI3K/ATP2B2/SPP1/CARTPT/ZNF488/RGS4/TSHZ3/GRIN2A/NPPA/SLC8A2/TMEM38A/CUX2/DLGAP4/CRH/CHGA/SLN/ATP1A1/FKBP1B/ATP1A3/ADRA2A/NPTXR/KCNA1/TMEM25/DLG1/CBLN1/NPTX2/ANXA6/EGR2/STX1A/FBXO32/SCN3B/HOMER1/CACNA1G/ATP1B1/NLGN1/PPARG/MAG/CALM2/SCN1B/NRXN1/C1QTNF1/TPPP/PPP3CA/LPCAT3/PTGS2/MGLL/CRHBP/CASQ1/ATP2B1/ATP2A2/NMU/KCNB2/STC1/EDNRA/OPRL1/CAMK2B/CALM3/YWHAE/PTAFR/CACNB1/CXADR/GLRX3/HOPX/KCNMB4/PDE9A/…
BP	GO:0045055	regulated exocytosis	195	0.362611	1.61418	0.000162272	0.0111133	0.0100047	2679	tags=27%, list=14%, signal=23%	ADCY1/RPH3A/PRKCB/SYP/CHGA/SNCA/PRKCG/ADRA2A/CADPS2/CDK5R2/STX1A/CPLX3/CACNA1G/KCNB1/NLGN1/PIP5K1C/RASGRP1/NCKAP1L/NKG7/VAMP2/SYT12/UNC13A/SYT13/LAT2/CSPG5/CRHBP/SYNGR3/GRP/RAB15/ATP2A2/LYN/IL4R/CALM3/PTAFR/RAB3A/RAB11FIP2/ZP3/VAMP8/TMEM79/HYAL3/SYT5/NAPA/SYT6/RIMS1/BACE1/SNAP29/CDK5/PFN2/AP1G1/CACNA1I/PPP3CB/PIK3CG
BP	GO:0010975	regulation of neuron projection development	368	0.334262	1.61046	1.04662e-05	0.00139375	0.00125472	2806	tags=25%, list=14%, signal=22%	RIT2/SPP1/UST/STMN2/ARC/CX3CL1/SERPINI1/CUX2/LZTS1/NGEF/FKBP1B/NTNG1/MAP1B/FEZF2/S100A9/FAT3/SLIT2/BCL11A/L1CAM/STAU2/LRRC4C/RTN4/LPAR1/NLGN1/MAG/TUBB2B/RTN4RL1/EPHB2/SCN1B/CRMP1/ZNF804A/SEMA3G/PPP3CA/EPHA4/NPTN/CNTN1/FUT9/CDK5R1/HECW1/CAMK1/LYN/TIAM2/SEMA3A/CAMK2B/DPYSL5/HSPA5/RTN4RL2/THY1/SEZ6/CNTN2/TRPV2/POU3F2/NEFL/KLK6/MAPT/ACTR2/CHN1/BDNF/EFNB2/EPHB3/MARK1/ITPKA/GPC2/DHX36/MAP3K13/DBNL/FGF1…
CC	GO:0034703	cation channel complex	150	0.376086	1.6096	0.000774696	0.03151	0.0283668	2186	tags=26%, list=11%, signal=23%	KCNH4/KCNG1/GRIN2A/KCNF1/KCNV1/FKBP1B/OLFM3/CNIH3/KCNA1/CACNB3/FKBP1A/SCN3B/CACNA1G/KCNB1/KCNK1/CALM2/KCNS1/DLG3/SCN1B/OLFM2/KCNIP3/CACNG3/PKD2L1/KCNB2/CALM3/LRRC38/KCNQ3/CACNB1/KCNJ16/KCNIP1/KCNMB4/GRIN1/KCND2/AKAP6/HCN1/KCND1/CACNA1A/KCNS2/PDE4D
BP	GO:0016358	dendrite development	198	0.359388	1.60696	0.000219273	0.0132504	0.0119286	3129	tags=30%, list=16%, signal=26%	DCLK1/ARC/CUX2/LZTS1/NGEF/MAP1B/FEZF2/FAT3/BCL11A/ASAP1/SLITRK5/STAU2/SLC25A46/LPAR1/NLGN1/EPHB2/PPP3CA/EPHA4/CDK5R1/HECW1/CAMK1/EPHB1/SEMA3A/NCK2/CAMK2B/DPYSL5/IGF2BP1/MEF2C/SEZ6/TPBG/UBA6/ACTR2/CELSR2/PPP1R9B/CDC42/EPHB3/MARK1/ITPKA/DHX36/DBNL/GORASP1/FLRT1/KIDINS220/GPR37/CDK5/HPRT1/TANC2/GHRL/ANKRD27/VLDLR/UBE3A/ELAVL4/ARF4/RAP2A/MAPK6/CAMK2A/GRIN3A/MINK1/PTEN/MECP2
BP	GO:0023061	signal release	342	0.338147	1.60425	7.90095e-06	0.00120884	0.00108826	2461	tags=23%, list=13%, signal=21%	SPP1/ADCY1/CARTPT/ADCYAP1/RPH3A/PRKCB/SYP/CRH/CHGA/SNCA/UCP2/FKBP1B/PRKCG/ANXA1/RASL10B/SLC32A1/VGF/PTPRN/ADRA2A/ENSA/CADPS2/SMPD3/STX1A/PRKCE/CPLX3/GPR68/KCNB1/NLGN1/SOX11/PPARG/PIP5K1C/NOS2/VAMP2/GRM2/IRS1/SYT12/NRXN1/C1QTNF1/EPHA5/PPP3CA/UNC13A/SYT13/PTGS2/CSPG5/CRHBP/GRP/ATP2A2/MIDN/LYN/FGF23/CALM3/MEF2C/RAB3A/RAB11FIP2/KCNMB4/VAMP8/GRM4/PTPRN2/SCG5/BAD/SIRT6/SLC16A2/CCL5/NRXN2/SOX4/SYT5/NAPA…
BP	GO:0022900	electron transport chain	129	0.3805	1.60405	0.000661162	0.0284695	0.0256297	4200	tags=40%, list=22%, signal=31%	SNCA/COX7B/NDUFB3/COX6B1/COX7A2/NDUFA12/NDUFA1/ASPH/CIAPIN1/NDUFB6/CYBB/NDUFV2/COX11/POR/SRD5A1/NDUFB2/NDUFAB1/COX6C/COX5A/GLRX2/CYCS/PDIA5/NDUFB4/UQCRH/GLDC/NDUFS5/BID/COX7C/UQCRHL/NDUFA2/NDUFS4/IDH3B/GSR/COX8A/CHCHD2/GPD2/UQCRC2/CYC1/UQCRB/NDUFA8/NDUFA4/UQCRQ/NDUFA7/NCF2/SDHD/SOD2/NDUFAF1/NDUFA6/CYBA/UQCRC1/UQCRFS1
BP	GO:0008016	regulation of heart contraction	145	0.373576	1.59505	0.000666108	0.0285118	0.0256677	1546	tags=19%, list=8%, signal=18%	TNNI3K/ATP2B2/RGS4/NPPA/SLC8A2/TMEM38A/CHGA/ATP1A1/FKBP1B/ATP1A3/DLG1/SCN3B/CACNA1G/ATP1B1/CALM2/SCN1B/ATP2B1/ATP2A2/STC1/EDNRA/CALM3/YWHAE/CXADR/GLRX3/HOPX/KCNJ12/SLC1A1/SMAD7
CC	GO:0030658	transport vesicle membrane	177	0.358876	1.58082	0.000591912	0.0261131	0.0235083	3399	tags=33%, list=18%, signal=28%	RPH3A/SYP/TMEM163/MAL2/NCALD/NRGN/SNCA/SLC32A1/PTPRN/CNIH3/SVOP/STX1A/SLC6A17/CPLX3/VAMP2/DGKI/SYT12/UNC13A/SYNGR3/ATP2B1/SEC23A/CALM3/RAB3A/STX6/SLC30A3/VTI1B/HLA-DRB3/PTPRN2/ITPR1/ATP6AP2/SYT5/SPRED2/STX10/SYT6/ATP6V1G2/RAB3C/RAB1A/PRRT1/SYTL4/HLA-DRB4/RAB35/B2M/AP1G1/SEC24A/AFTPH/CD59/CNIH2/GAD2/CLTA/SYT4/SYPL1/STX12/PDCD6/SCG3/BCL2L1/ATP6V1E1/MCFD2/SLC6A9/SLC17A7
BP	GO:0051924	regulation of calcium ion transport	179	0.35617	1.57623	0.000563483	0.025325	0.0227988	1757	tags=22%, list=9%, signal=21%	RGS4/CX3CL1/HPCA/NPPA/TMEM38A/SNCA/SLN/FKBP1B/ADRA2A/CABP1/CACNB3/PRKCE/PLP1/FKBP1A/HOMER1/ATP1B1/HOMER2/CALM2/LILRA2/TSPAN13/CXCL10/PPP3CA/PTGS2/RAMP3/CASQ1/ATP2B1/STC1/LYN/OPRL1/CAMK2B/PACSIN3/CALM3/YWHAE/CACNB1/THY1/TRPV2/GRIN1/RCVRN/CCL5/AKAP6
BP	GO:0019932	second-messenger-mediated signaling	208	0.350279	1.57042	0.000830805	0.0330073	0.0297147	2335	tags=24%, list=12%, signal=21%	RIT2/ADCY1/ADCYAP1/HPCA/GRIN2A/NPPA/SLC8A2/TMEM38A/NCALD/FKBP1B/NRG1/DYRK2/FHL2/CAMKK2/LPAR1/ATP1B1/TREM2/HOMER2/NOS2/CALM2/MGRN1/HINT1/EPHA5/PPP3CA/LAT2/MCOLN1/FPR1/THBS1/CASQ1/ATP2A2/OPRL1/CALM3/CAP1/PDE9A/CAP2/PEX5L/VCAM1/MAPT/ITPR1/GRIN1/PPP1R9B/AKAP6/NEUROD2/PDE7B/GPR143/CDC34/PDE4D/GUCA1A/GPR61/GPR3
BP	GO:0007186	G protein-coupled receptor signaling pathway	487	0.316965	1.56993	6.20625e-06	0.0010626	0.000956602	2359	tags=21%, list=12%, signal=19%	GPR26/CORT/RIT2/ADCY1/CARTPT/ADCYAP1/RGS4/TAC1/CX3CL1/VIPR2/SYP/NPPA/STMN1/PENK/PLCB1/VIPR1/CHGA/SNCA/ANXA1/PNOC/ADRA2A/NXPH3/OPN3/LGR6/GLRB/SSTR1/GABBR2/AGRN/KCTD8/GPR68/HOMER1/OR52N2/LPAR1/PPARG/HOMER2/RGS7/GRM2/CALM2/DGKI/MGRN1/ATRNL1/SST/CXCL10/RGS6/GRM3/PRKACB/CCKBR/MGLL/OR2B2/GPR12/MRAP2/NPY/GRP/RAMP3/FPR1/RGS7BP/GPR161/GPR176/MET/CDK5R1/NMU/EDNRA/OPRL1/CALM3/MARCO/PTAFR/XPR1/GNG4/CHRM1/CNT…
MF	GO:0005525	GTP binding	278	0.333035	1.54608	0.000139425	0.0101273	0.0091171	2831	tags=24%, list=15%, signal=21%	RASL11B/RIT2/DIRAS2/IFI44L/RHOBTB2/GBP4/RASL10B/TUBA1A/ANXA6/TUBG1/TUBB2B/GIMAP7/TUBB3/RERG/RAB4A/RAB33A/ARL4D/RABL3/TUBA4A/RAB15/AGAP2/RND1/RAB3A/GIMAP6/ARL4C/DIRAS1/TUBB/GTPBP8/GBP2/EHD4/TGM2/SCG5/ATL3/RAB40C/CDC42/EIF5B/ARF5/GNAQ/EIF2B2/RALA/GNAZ/RRAS2/MX2/RAB3C/RAB1A/RAB32/GNA15/RNF112/SRL/ARL6/RAB35/RAB43/MAB21L1/RAN/TUBB2A/GUCY1A2/RHEBL1/TUBG2/GBP1/MFHAS1/GNL3/RAB38/NUDT2/ARF4/RAP2A/RAB7B
BP	GO:0007611	learning or memory	220	0.339334	1.53214	0.000383622	0.0191571	0.0172462	3203	tags=30%, list=17%, signal=26%	ADCY1/ARC/GRIN2A/SLC8A2/RASGRF1/CUX2/PLCB1/CRH/NRGN/PRKCG/B3GAT1/NPTX2/PAK6/EGR2/TREM2/GM2A/LGMN/EPHB2/NTAN1/NRXN1/ATXN1/PTGS2/NPTN/NLGN4Y/CRHBP/FEN1/PDE1B/CAMK4/CAMK2N1/OPRL1/MEF2C/CNTN2/SLC1A1/TPBG/UBA6/MAPT/ACTR2/GRIN1/PPP1R9B/BDNF/RGS14/GABRA5/PRKAR1B/ZNF385A/NEUROD2/NRXN2/TTBK1/FGF13/LDLR/TBR1/PRRT1/CDK5/B2M/PPP3CB/VLDLR/UBE3A/ELAVL4/ARF4/SLC8A3/DDHD2/NLGN4X/B4GALT2/SYT4/PTEN/MECP2/SYT11/NTF3
CC	GO:0034702	ion channel complex	198	0.342354	1.53079	0.000716049	0.0301118	0.0271081	1852	tags=21%, list=10%, signal=19%	KCNH4/KCNG1/GRIN2A/KCNF1/KCNV1/FKBP1B/CHRNA2/OLFM3/CNIH3/KCNA1/GLRB/CACNB3/FKBP1A/SCN3B/CACNA1G/GABRD/KCNB1/KCNK1/CALM2/KCNS1/DLG3/SCN1B/OLFM2/KCNIP3/GABRA1/OSTM1/CACNG3/PKD2L1/KCNB2/CALM3/LRRC38/KCNQ3/CACNB1/KCNJ16/KCNIP1/KCNMB4/GRIN1/KCND2/GABRA5/AKAP6/HCN1/KCND1
MF	GO:0019001	guanyl nucleotide binding	290	0.327038	1.52611	0.000116458	0.00881526	0.00793592	2831	tags=23%, list=15%, signal=20%	RASL11B/RIT2/DIRAS2/PRPS2/IFI44L/RHOBTB2/GBP4/RASL10B/TUBA1A/ANXA6/TUBG1/TUBB2B/GIMAP7/TUBB3/RERG/RAB4A/RAB33A/ARL4D/RABL3/TUBA4A/RAB15/AGAP2/RND1/RAB3A/GIMAP6/ARL4C/DIRAS1/TUBB/GTPBP8/GBP2/EHD4/TGM2/SCG5/ATL3/RAB40C/CDC42/EIF5B/ARF5/GNAQ/EIF2B2/RALA/GNAZ/MPPED2/RRAS2/MX2/RAB3C/RAB1A/RAB32/GNA15/RNF112/SRL/ARL6/RAB35/RAB43/MAB21L1/RAN/TUBB2A/GUCY1A2/RHEBL1/TUBG2/GBP1/MFHAS1/GNL3/RAB38/NUDT2/ARF4/…
MF	GO:0032561	guanyl ribonucleotide binding	290	0.327038	1.52611	0.000116458	0.00881526	0.00793592	2831	tags=23%, list=15%, signal=20%	RASL11B/RIT2/DIRAS2/PRPS2/IFI44L/RHOBTB2/GBP4/RASL10B/TUBA1A/ANXA6/TUBG1/TUBB2B/GIMAP7/TUBB3/RERG/RAB4A/RAB33A/ARL4D/RABL3/TUBA4A/RAB15/AGAP2/RND1/RAB3A/GIMAP6/ARL4C/DIRAS1/TUBB/GTPBP8/GBP2/EHD4/TGM2/SCG5/ATL3/RAB40C/CDC42/EIF5B/ARF5/GNAQ/EIF2B2/RALA/GNAZ/MPPED2/RRAS2/MX2/RAB3C/RAB1A/RAB32/GNA15/RNF112/SRL/ARL6/RAB35/RAB43/MAB21L1/RAN/TUBB2A/GUCY1A2/RHEBL1/TUBG2/GBP1/MFHAS1/GNL3/RAB38/NUDT2/ARF4/…
BP	GO:0006164	purine nucleotide biosynthetic process	166	0.345512	1.51632	0.00126273	0.0456297	0.041078	3924	tags=29%, list=20%, signal=23%	ADCY1/HPCA/PRPS2/NPPA/SNCA/TREM2/NDUFB3/NOS2/DCK/SLC35B2/NDUFA12/NDUFA1/NDUFB6/LDHC/ACOT7/NDUFV2/ELOVL6/GMPS/PANK1/NME7/NDUFB2/NDUFAB1/DLAT/RCVRN/NDUFB4/PANK3/NDUFS5/NDUFA2/NDUFS4/ELOVL4/GUCA1A/PPT2/HPRT1/PFAS/GUCY1A2/ACSL3/NUDT2/NDUFA8/GUK1/PPCS/PRPS1/APRT/ALDOA/NME1/NDUFA7/SDHD/ACLY/NDUFA6
MF	GO:0030545	signaling receptor regulator activity	262	0.328289	1.5118	0.00037093	0.0190526	0.017152	2675	tags=24%, list=14%, signal=21%	CORT/SPP1/CARTPT/ADCYAP1/CX3CL1/NPPA/TNFSF10/PENK/C1QTNF4/CRH/PNOC/NRG1/VGF/SCG2/CHGB/GREM1/PRKCE/FGF14/LY6E/SST/CXCL10/IGSF1/GPNMB/NBL1/SEMA3G/FGF11/CSPG5/MRAP2/NPY/GRP/TNFSF13B/STC1/KITLG/FGF23/IL24/SEMA3A/GDF10/WNT4/ZP3/FNDC5/GMFG/LYPD6/BDNF/CCL5/PPBP/HMGB1/FGF13/WFIKKN2/SEMA6B/CDC42EP2/CLEC11A/PRRT1/FAM3C/CDK5/BMPR2/GDF1/INHBE/IL32/CCL8/GHRL/EBI3/CKLF/PDGFB
BP	GO:0051046	regulation of secretion	452	0.306362	1.50596	3.8963e-05	0.00419487	0.00377642	2630	tags=21%, list=14%, signal=19%	SPP1/PCSK1/OAS2/ADCY1/CARTPT/ADCYAP1/RPH3A/PRKCB/SYP/S100A8/CRH/CHGA/SNCA/UCP2/FKBP1B/PRKCG/ANXA1/RASL10B/NRG1/PTPRN/ADRA2A/ENSA/CADPS2/SMPD3/CDK5R2/SDCBP/STX1A/PRKCE/CPLX3/GPR68/CACNA1G/KCNB1/NLGN1/TREM2/SOX11/PPARG/CYP51A1/NOS2/NCKAP1L/VAMP2/GRM2/IRS1/SYT12/C1QTNF1/EPHA5/PPP3CA/SYT13/CSPG5/CRHBP/GRP/RAB15/ATP2A2/MIDN/STC1/LYN/IL4R/FGF23/OPRL1/CALM3/MEF2C/PTAFR/STAM/EXPH5/RAB3A/PPID/RSAD2/ZP3/KC…
BP	GO:1903530	regulation of secretion by cell	416	0.307378	1.4972	0.000107598	0.00859711	0.00773953	2630	tags=21%, list=14%, signal=19%	SPP1/PCSK1/ADCY1/CARTPT/ADCYAP1/RPH3A/PRKCB/SYP/CRH/CHGA/SNCA/UCP2/FKBP1B/PRKCG/ANXA1/RASL10B/ADRA2A/ENSA/CADPS2/SMPD3/CDK5R2/SDCBP/STX1A/PRKCE/CPLX3/GPR68/CACNA1G/KCNB1/NLGN1/TREM2/SOX11/PPARG/CYP51A1/NOS2/NCKAP1L/VAMP2/GRM2/IRS1/SYT12/C1QTNF1/EPHA5/PPP3CA/SYT13/CSPG5/CRHBP/GRP/RAB15/ATP2A2/MIDN/LYN/IL4R/FGF23/CALM3/MEF2C/PTAFR/STAM/EXPH5/RAB3A/PPID/RSAD2/ZP3/KCNMB4/VAMP8/SCG5/BAD/SIRT6/HYAL3/CC…
CC	GO:0060205	cytoplasmic vesicle lumen	241	0.32857	1.49607	0.000548103	0.0249456	0.0224572	4182	tags=33%, list=22%, signal=26%	PCSK1/S100A8/PENK/SERPINI1/S100A9/SDCBP/HSPA6/SERPINA1/GM2A/TF/GGH/OSTF1/PSMD7/PSMA5/PRTN3/ACTR10/GRP/THBS1/PGAM1/PSMD1/HSPA8/LYZ/CAP1/PYGL/TUBB/VTI1B/FABP5/GMFG/ACTR2/TRAPPC1/PRDX4/PPBP/PRSS2/HMGB1/DBNL/ARPC5/GDI2/PTPN6/BACE1/A1BG/DYNLT1/S100A11/FAM3C/B2M/GHRL/PDGFB/CAND1/PRKCD/VWF/COMMD9/QSOX1/PSMD14/HSP90AA1/CTSZ/RNASE2/SCG3/PSMD11/ILF2/LGALS3BP/VAT1/AGA/SRP14/APRT/ALDOA/GLA/CLU/CLEC3B/FERMT3/…
BP	GO:0051047	positive regulation of secretion	223	0.329741	1.49518	0.000779973	0.03151	0.0283668	2692	tags=22%, list=14%, signal=19%	SPP1/PCSK1/CARTPT/ADCYAP1/S100A8/CRH/SNCA/RASL10B/CADPS2/SMPD3/CDK5R2/SDCBP/STX1A/PRKCE/GPR68/CACNA1G/KCNB1/NLGN1/TREM2/SOX11/PPARG/C1QTNF1/PPP3CA/GRP/RAB15/IL4R/OPRL1/PTAFR/STAM/EXPH5/RAB3A/PPID/ZP3/VAMP8/BAD/SIRT6/HYAL3/SOX4/RFX6/SYTL4/CDK5/OXCT1/MAP2K6/AP1G1/CACNA1I/SEC24A/GHRL/PPP3CB/ACSL3
BP	GO:0010817	regulation of hormone levels	329	0.314891	1.48933	0.000285889	0.0160587	0.0144568	1837	tags=20%, list=9%, signal=18%	SPP1/PCSK1/CARTPT/ADCYAP1/CYP26B1/CRH/CHGA/UCP2/ATP1A1/CYP26A1/FKBP1B/ANXA1/RASL10B/VGF/PTPRN/ADRA2A/ENSA/SMPD3/STX1A/PRKCE/CPLX3/GPR68/MED1/CRABP1/KCNB1/SOX11/PPARG/NOS2/RDH14/IRS1/RBP1/RDH12/C1QTNF1/EPHA5/PPP3CA/EGR1/CRHBP/CRYM/GRP/MIDN/LYN/FGF23/YIPF5/CYP46A1/RAB11FIP2/WNT4/ADAM10/VAMP8/AKR1C2/RPE65/ALDH1A1/SLC39A14/PTPRN2/SCG5/KLK6/POR/BAD/SIRT6/TPO/SRD5A1/SLC16A2/DIO2/ATP6AP2/CCL5/SOX4/BACE2
CC	GO:0034774	secretory granule lumen	239	0.32635	1.48685	0.000933282	0.0357747	0.0322061	4182	tags=33%, list=22%, signal=26%	PCSK1/S100A8/PENK/SERPINI1/S100A9/SDCBP/HSPA6/SERPINA1/GM2A/TF/GGH/OSTF1/PSMD7/PSMA5/PRTN3/ACTR10/GRP/THBS1/PGAM1/PSMD1/HSPA8/LYZ/CAP1/PYGL/TUBB/VTI1B/FABP5/GMFG/ACTR2/TRAPPC1/PRDX4/PPBP/PRSS2/HMGB1/DBNL/ARPC5/GDI2/PTPN6/A1BG/DYNLT1/S100A11/FAM3C/B2M/GHRL/PDGFB/CAND1/PRKCD/VWF/COMMD9/QSOX1/PSMD14/HSP90AA1/CTSZ/RNASE2/SCG3/PSMD11/ILF2/LGALS3BP/VAT1/AGA/SRP14/APRT/ALDOA/GLA/CLU/CLEC3B/FERMT3/POMC/N…
CC	GO:0045121	membrane raft	233	0.327543	1.48591	0.000741931	0.0306622	0.0276036	2261	tags=22%, list=12%, signal=20%	RIT2/ATP2B2/ADCY1/ARC/RGMB/SULF1/MAL2/ATP1A1/RFTN1/DLG1/SDCBP/BST2/ATP1B1/TREM2/MAG/RGS7/BSG/RTN4RL1/CD79A/CD14/IRS1/SERPINH1/PTGS2/LAT2/PRTN3/CD55/ATP2B1/CNTN1/EPHB1/LYN/PI4K2A/RTN4RL2/CXADR/PTGIS/THY1/TUBB/SLC1A1/MAPT/PLSCR1/LYPD6/KCND2/AKAP6/PRKAR2A/FLOT1/EFNB1/STAT6/PLLP/BACE1/BAALC/TRAF2/CD8A
CC	GO:0031983	vesicle lumen	242	0.326257	1.48184	0.000526955	0.0246061	0.0221516	4182	tags=33%, list=22%, signal=26%	PCSK1/S100A8/PENK/SERPINI1/S100A9/SDCBP/HSPA6/SERPINA1/GM2A/TF/GGH/OSTF1/PSMD7/PSMA5/PRTN3/ACTR10/GRP/THBS1/PGAM1/PSMD1/HSPA8/LYZ/CAP1/PYGL/TUBB/VTI1B/FABP5/GMFG/ACTR2/TRAPPC1/PRDX4/PPBP/PRSS2/HMGB1/DBNL/ARPC5/GDI2/PTPN6/BACE1/A1BG/DYNLT1/S100A11/FAM3C/B2M/GHRL/PDGFB/CAND1/PRKCD/VWF/COMMD9/QSOX1/PSMD14/HSP90AA1/CTSZ/RNASE2/SCG3/PSMD11/ILF2/LGALS3BP/VAT1/AGA/SRP14/APRT/ALDOA/GLA/CLU/CLEC3B/FERMT3/…
CC	GO:0098857	membrane microdomain	234	0.326724	1.47877	0.00109055	0.0408444	0.0367701	2261	tags=22%, list=12%, signal=19%	RIT2/ATP2B2/ADCY1/ARC/RGMB/SULF1/MAL2/ATP1A1/RFTN1/DLG1/SDCBP/BST2/ATP1B1/TREM2/MAG/RGS7/BSG/RTN4RL1/CD79A/CD14/IRS1/SERPINH1/PTGS2/LAT2/PRTN3/CD55/ATP2B1/CNTN1/EPHB1/LYN/PI4K2A/RTN4RL2/CXADR/PTGIS/THY1/TUBB/SLC1A1/MAPT/PLSCR1/LYPD6/KCND2/AKAP6/PRKAR2A/FLOT1/EFNB1/STAT6/PLLP/BACE1/BAALC/TRAF2/CD8A
BP	GO:0006887	exocytosis	286	0.316812	1.47597	0.000424134	0.0210341	0.0189359	2679	tags=24%, list=14%, signal=21%	ADCY1/RPH3A/PRKCB/SYP/CHGA/SNCA/PRKCG/ANXA1/ADRA2A/CADPS2/SMPD3/CDK5R2/SDCBP/STX1A/CPLX3/CACNA1G/KCNB1/NLGN1/PIP5K1C/RASGRP1/NCKAP1L/NKG7/VAMP2/SYT12/UNC13A/SYT13/LAT2/CSPG5/CRHBP/COPS5/SYNGR3/GRP/RAB15/ATP2A2/LYN/IL4R/CALM3/PTAFR/STAM/EXPH5/RAB3A/RAB11FIP2/ZP3/VAMP8/TMEM79/VTI1B/SCFD2/EXOC6/TMEM167A/HYAL3/CCL5/RALA/SYT5/NAPA/SYT6/RIMS1/RAB3C/BACE1/SNAP29/SYTL4/CDK5/PFN2/PAK1/AP1G1/CACNA1I/CCL8/P…
MF	GO:0030546	signaling receptor activator activity	237	0.323565	1.47242	0.00135538	0.0480123	0.043223	2675	tags=24%, list=14%, signal=21%	CORT/SPP1/CARTPT/ADCYAP1/CX3CL1/NPPA/TNFSF10/PENK/C1QTNF4/CRH/PNOC/NRG1/VGF/SCG2/CHGB/GREM1/PRKCE/FGF14/SST/CXCL10/GPNMB/NBL1/SEMA3G/FGF11/CSPG5/NPY/GRP/TNFSF13B/STC1/KITLG/FGF23/IL24/SEMA3A/GDF10/WNT4/ZP3/FNDC5/GMFG/BDNF/CCL5/PPBP/HMGB1/FGF13/SEMA6B/CDC42EP2/CLEC11A/FAM3C/CDK5/BMPR2/GDF1/INHBE/IL32/CCL8/GHRL/EBI3/CKLF/PDGFB
CC	GO:0030133	transport vesicle	330	0.309051	1.46286	0.000303185	0.0166428	0.0149826	3429	tags=28%, list=18%, signal=24%	PCSK1/RPH3A/GRIN2A/MFF/SYP/TMEM163/PENK/MAL2/NCALD/CHGA/NRGN/SNCA/SLC32A1/VGF/PTPRN/CNIH3/SVOP/TMED3/STX1A/SLC6A17/CPLX3/VAMP2/DGKI/SYT12/UNC13A/SYT13/CLCN4/CD55/COPS5/SYNGR3/ATP2B1/RAB15/SEC23A/CALM3/SURF4/FGFRL1/RAB3A/STX6/SLC30A3/VTI1B/HLA-DRB3/PTPRN2/ITPR1/YIPF1/GRIN1/COPS4/RAB40C/BDNF/ATP6AP2/SYT5/SPRED2/NRSN1/STX10/SYT6/ATP6V1G2/RAB3C/NRSN2/BACE1/RAB1A/RNF112/PRRT1/SYTL4/HLA-DRB4/RAB35/B2M/…
BP	GO:0048667	cell morphogenesis involved in neuron differentiation	453	0.297277	1.46206	0.000207019	0.0128334	0.0115532	2748	tags=24%, list=14%, signal=21%	SPP1/ADCY1/UST/DCLK1/ARC/STMN1/CUX2/LZTS1/NGEF/NTNG1/MAP1B/FEZF2/LGR6/VSTM2L/SLIT2/L1CAM/SLITRK5/CDK5R2/NR4A2/STAU2/EGR2/SLC25A46/LRRC4C/OLFM1/TTL/RTN4/EPHB6/NLGN1/MAG/TUBB2B/SLITRK4/BSG/EPHA8/B3GNT2/TUBB3/EPHB2/SCN1B/CRMP1/NRXN1/SEMA3G/EPHA5/PPP3CA/EPHA4/CNTN4/NPTN/SLITRK3/CNTN1/CDK5R1/HECW1/EPHB1/TIAM2/EDNRA/SEMA3A/CAMK2B/DPYSL5/IGF2BP1/MEF2C/RAB3A/KALRN/THY1/CNTN2/TRPV2/POU3F2/NEFL/TPBG/MAPT/A…
BP	GO:0061564	axon development	384	0.2957	1.43064	0.000439543	0.0215017	0.0193569	2630	tags=22%, list=14%, signal=20%	SPP1/ADCY1/UST/DCLK1/STMN1/FKBP1B/NTNG1/MAP1B/FEZF2/LGR6/VSTM2L/SLIT2/L1CAM/SLITRK5/CDK5R2/NR4A2/EGR2/PLP1/SLC25A46/LRRC4C/OLFM1/TTL/RTN4/EPHB6/APOD/MAG/TUBB2B/SLITRK4/BSG/EPHA8/RTN4RL1/B3GNT2/TUBB3/EPHB2/SCN1B/CRMP1/NRXN1/SEMA3G/EPHA5/EPHA4/CNTN4/NPTN/CSPG5/SLITRK3/CNTN1/CDK5R1/EPHB1/TIAM2/EDNRA/SEMA3A/DPYSL5/RTN4RL2/RAB3A/KALRN/THY1/CNTN2/TRPV2/POU3F2/NEFL/MAPT/CHN1/BDNF/EFNB2/EPHB3/UNC5D/FLOT1…
BP	GO:0007409	axonogenesis	350	0.297565	1.41484	0.000851559	0.0336459	0.0302897	2630	tags=23%, list=14%, signal=20%	SPP1/ADCY1/UST/DCLK1/STMN1/NTNG1/MAP1B/FEZF2/LGR6/VSTM2L/SLIT2/L1CAM/SLITRK5/CDK5R2/NR4A2/EGR2/SLC25A46/LRRC4C/OLFM1/TTL/RTN4/EPHB6/MAG/TUBB2B/SLITRK4/BSG/EPHA8/B3GNT2/TUBB3/EPHB2/SCN1B/CRMP1/NRXN1/SEMA3G/EPHA5/EPHA4/CNTN4/NPTN/SLITRK3/CNTN1/CDK5R1/EPHB1/TIAM2/EDNRA/SEMA3A/DPYSL5/RAB3A/KALRN/THY1/CNTN2/TRPV2/POU3F2/NEFL/MAPT/CHN1/BDNF/EFNB2/EPHB3/UNC5D/FLOT1/EFNB1/B4GALT5/MAP3K13/DBNL/FGF13/CSF1R…
CC	GO:0098797	plasma membrane protein complex	417	0.285269	1.39016	0.000530731	0.0246225	0.0221663	2639	tags=21%, list=14%, signal=18%	KCNH4/FCER1G/KCNG1/GRIN2A/KCNF1/KCNV1/ATP1A1/CDH8/ATP1A3/CHRNA2/OLFM3/CNIH3/KCNA1/TFRC/DLG1/GLRB/SDCBP/GABBR2/ITGA7/CACNB3/PLP1/FKBP1A/EPS15/SCN3B/CACNA1G/KCNB1/ATP1B1/KCNK1/TF/CALM2/CD79A/KCNS1/DLG3/IRS1/SCN1B/OLFM2/KCNIP3/APC2/PSENEN/CACNG3/IL27RA/RAMP3/CYBB/KCNB2/LYN/NCF1C/CALM3/LRRC38/KCNQ3/CACNB1/GNG4/KCNJ16/KCNIP1/HLA-DMB/KCNMB4/HLA-DRB3/DCHS1/CDH6/VCAM1/GRIN1/GNG3/KCND2/GNAQ/HCN1/FLOT1/KCN…
BP	GO:0007610	behavior	458	0.282239	1.38803	0.000734379	0.0305255	0.0274806	3203	tags=25%, list=17%, signal=21%	ADCY1/CARTPT/TAC1/ARC/GRIN2A/SLC8A2/PENK/RASGRF1/CUX2/PLCB1/CRH/NRGN/SNCA/PRKCG/NRG1/VGF/FEZF2/B3GAT1/GLRB/SLITRK5/NPTX2/PAK6/NR4A2/EGR2/PRKCE/SLC25A46/HOMER1/NLGN1/TREM2/HOMER2/GM2A/GRM2/LGMN/EPHB2/NTAN1/NRXN1/EPHA4/ATXN1/PTGS2/EGR1/NPTN/NLGN4Y/CRHBP/MRAP2/NPY/GRP/FEN1/THBS1/PDE1B/GPR176/CNTN1/CAMK4/NMU/CAMK2N1/OPRL1/MEF2C/SEZ6/CNTN2/USP46/SLC1A1/TPBG/UBA6/MAPT/ACTR2/GRIN1/SRD5A1/PPP1R9B/KCND2/S…
MF	GO:0005509	calcium ion binding	458	0.281289	1.38336	0.000794083	0.0319009	0.0287187	2309	tags=21%, list=12%, signal=19%	PVALB/PCP4/FBLN7/PPEF1/PLA2G5/RPH3A/HPCA/SULF1/S100A8/NELL1/NCALD/PLCB1/MGP/ALPL/SNCA/STAB1/CDH8/ANXA1/S100A9/FAT3/SLIT2/CABP1/AMY1C/ANXA6/AGRN/CAMKK2/EPS15/MEX3B/NELL2/RASGRP1/LPL/PCDH11Y/CALM2/CAPN12/SYT12/NRXN1/HPCAL1/KCNIP3/PPP3CA/UNC13A/SYT13/RCN1/PCDH20/PCDH10/ASPH/THBS1/CASQ1/LPCAT2/NECAB3/CDK5R1/ATP2A2/PKD2L1/CALR/CALM3/HSPA5/CD93/RAB11FIP4/KCNIP1/EML1/EHD4/DCHS1/TGM2/CDH6/PCDH12/ITPR1/PL…
BP	GO:0048598	embryonic morphogenesis	410	-0.317736	-1.49055	6.96512e-05	0.00618348	0.00556666	3646	tags=27%, list=19%, signal=22%	NAGLU/GPI/PLXNB2/RDH10/SP8/MTHFD1L/MAP2K1/NIPBL/CTR9/ATP6V1B1/SLC9A3R1/NR0B1/ITGB1/NOTCH2/TGFB3/PAF1/UGDH/USH1C/CC2D2A/VAX2/DVL2/FGF2/STK4/ZBTB17/IFT140/COL11A1/ATOH8/NR4A3/FBXW4/TBX1/LRP5L/IFT172/SOX9/DYNC2H1/TGFB1I1/ACVR1/ABL1/MBNL1/SETDB2/RNF207/FBN2/LEF1/PAX6/PAX8/LRIG1/ITGAV/NDST1/MED12/POFUT2/NF2/WNK1/BBS4/ZNF358/ATP8A2/WNT7B/BMI1/APOA1/TEAD2/SLC44A4/GNA12/AMOT/CLASP1/DUSP5/EFNA1/KCNQ4/HDAC…
BP	GO:0048545	response to steroid hormone	244	-0.333497	-1.49326	0.00117519	0.0433374	0.0390144	1916	tags=20%, list=10%, signal=18%	UBR5/HNRNPU/RXRB/PPARA/ZFP36L2/JAK2/WNT7B/OXTR/BMI1/PDCD7/CARM1/BCL2/CFLAR/NR3C2/GJB2/SSTR2/FAM107A/CYP1B1/PAM/HDAC1/HSPA1A/ATP1A2/UCN/IL6/DDIT4/NPAS4/NOTCH1/SAFB2/YAP1/EDN1/DDX17/AKR1C3/ACSBG1/IL10/SREBF1/TXNIP/PTGDS/SCNN1D/GABRB1/NKX2-2/GPR83/SGK1/HEYL/AQP4/ZFP36/HSPA1B/CLOCK/FOS/FOSB
BP	GO:0008544	epidermis development	186	-0.361245	-1.56958	0.00136324	0.0480544	0.0432609	2055	tags=21%, list=11%, signal=19%	ERCC3/PAX6/NUMA1/FST/PPARA/SFRP4/BCL2/SLC44A4/HDAC1/HES5/PLOD1/NSUN2/DLL1/WNT5A/SOX18/NOTCH1/SVEP1/YAP1/JAG1/MYO6/PTCH1/FERMT1/INTU/KLF4/FLNB/AKR1C3/SOSTDC1/EMP1/SCRIB/SOS1/PALLD/TXNIP/STRC/LAMA5/CDH23/COL7A1/IGFBP5/ZFP36/KLK7
BP	GO:0031032	actomyosin structure organization	158	-0.380551	-1.62177	0.000702672	0.029723	0.0267581	3271	tags=30%, list=17%, signal=25%	PPFIA1/ITGB1/PXN/TGFB3/FRMD6/KCTD13/ACTC1/ZYX/CSRP1/WASF2/PDCD6IP/ABL1/ASAP3/ARHGEF10/ALMS1/RHOC/NF2/BBS4/BAG4/APOA1/PAK2/NEBL/TMOD1/EPB41L4B/CFLAR/PTK2B/CLASP1/TTC8/TNNT2/LDB3/AKAP13/PHACTR1/FHOD1/PPM1F/S1PR1/EDN1/PDGFRB/MYH7/PROX1/MYOM2/FERMT2/DLC1/MYH3/FLNC/RAPGEF3/LMOD3/SDC4
BP	GO:0048562	embryonic organ morphogenesis	186	-0.373491	-1.62279	0.000606877	0.0264488	0.0238105	3646	tags=31%, list=19%, signal=25%	NAGLU/RDH10/MTHFD1L/NIPBL/ATP6V1B1/SLC9A3R1/NOTCH2/TGFB3/USH1C/VAX2/DVL2/IFT140/COL11A1/TBX1/IFT172/SOX9/ACVR1/SETDB2/RNF207/FBN2/PAX6/PAX8/LRIG1/NDST1/MED12/BBS4/ATP8A2/BMI1/TEAD2/SLC44A4/EFNA1/KCNQ4/MYO3B/STOX1/DLL1/WDR19/EFEMP1/WNT5A/SOX18/CHD7/EYA1/NOTCH1/GJB6/YAP1/MYO6/HIPK2/EDN1/AHI1/RYR2/PROX1/SCRIB/MAPK3/RBPMS2/STRC/CDH23/NPHP3/APLNR
BP	GO:0007286	spermatid development	93	-0.421102	-1.66864	0.00121196	0.0444654	0.0400299	2809	tags=26%, list=14%, signal=22%	SPO11/IQCG/JAM3/TMF1/SBF1/TBC1D20/BBS2/ZMYND15/BBS4/SPEF2/GALNTL5/DZIP1/DPY19L2P2/SIX5/DPY19L2/NSUN2/PLD6/PTCH1/CATSPER2/FANCG/DMC1/TTC21A/DNAH1/ADAD2
CC	GO:0005814	centriole	100	-0.437947	-1.74017	0.000315562	0.0170878	0.0153832	3397	tags=33%, list=18%, signal=27%	CENPJ/CCDC146/IFT20/NPHP4/CCDC68/HERC2/CCDC120/CEP164/KIF3A/PLK1/CCNF/IFT140/HTT/SDCCAG8/NEURL4/CNTLN/CCDC57/NIN/ALMS1/PARP3/BBS4/DZIP1/HSPA1A/PCNT/ODF2L/CCDC92/WDR90/INTU/RTTN/AHI1/SFI1/CEP192/HSPA1B
BP	GO:0055002	striated muscle cell development	50	-0.508221	-1.78127	0.000930468	0.0357747	0.0322061	1529	tags=28%, list=8%, signal=26%	NEBL/TMOD1/CFLAR/TNNT2/LDB3/AKAP13/EDN1/PDGFRB/MYH7/PROX1/MYOM2/MYH3/FLNC/LMOD3
BP	GO:0060113	inner ear receptor cell differentiation	41	-0.530249	-1.80264	0.00093707	0.0357747	0.0322061	3713	tags=39%, list=19%, signal=32%	RBPJ/NAGLU/SLC9A3R1/IFT20/USH1C/FGF2/TTC8/HES5/DLL1/NOTCH1/JAG1/MYO6/SCRIB/STRC/CDH23/SDC4
BP	GO:1904035	regulation of epithelial cell apoptotic process	64	-0.495396	-1.8124	0.000589552	0.0261131	0.0235083	4440	tags=47%, list=23%, signal=36%	PIAS4/ZFP36L1/NFE2L2/BOK/PDPK1/CDH5/GAS6/GSN/ANO6/STK4/TMF1/PDCD4/ABL1/ANGPTL4/KRIT1/PPARA/JAK2/SFRP4/BCL2/CFLAR/CD248/CCL2/SERPINE1/WFS1/IL6/YAP1/TEK/AKR1C3/NUPR1/ZFP36
CC	GO:0005801	cis-Golgi network	46	-0.530793	-1.83173	0.000512006	0.0240643	0.0216638	4099	tags=39%, list=21%, signal=31%	BOK/TRAPPC6A/COG3/GBF1/GOLGA6B/IFT20/GPR108/SCYL1/GOLGA2/BCL9/UBXN2A/GOLGB1/GOLGA8B/PHTF1/ANGEL1/FKTN/BLZF1/GOLGA8A
BP	GO:0042490	mechanoreceptor differentiation	44	-0.554302	-1.90669	0.00037967	0.0190923	0.0171878	3713	tags=41%, list=19%, signal=33%	RBPJ/NAGLU/SLC9A3R1/IFT20/USH1C/FGF2/SLC44A4/TTC8/HES5/DLL1/NOTCH1/JAG1/MYO6/SCRIB/STRC/NTRK2/CDH23/SDC4
BP	GO:0097501	stress response to metal ion	14	-0.74039	-1.93741	0.000329923	0.0177051	0.015939	2529	tags=64%, list=13%, signal=56%	MT3/MT1M/MT1X/MT1F/MT2A/MT1E/MT1A/MT1H/MT1G
BP	GO:0072337	modified amino acid transport	27	-0.629493	-1.96773	0.000367069	0.0190156	0.0171188	4079	tags=59%, list=21%, signal=47%	SLC6A8/SLC7A9/SLC25A13/ABCC4/SLC9A3R1/SLC1A4/SLC22A4/ABCC5/CTNS/SLC22A5/GJA1/SLC25A39/SLC16A12/MGST1/SLC6A12/SLC16A9
BP	GO:0071276	cellular response to cadmium ion	26	-0.641019	-1.96794	0.000777428	0.03151	0.0283668	2601	tags=50%, list=13%, signal=43%	CHUK/MT3/MT1M/MT1X/MT1F/MT2A/MT1E/MT1A/AKR1C3/MT1H/MAPK3/MT1G/FOS
BP	GO:0010273	detoxification of copper ion	10	-0.836677	-1.99061	0.000132396	0.00971491	0.00874583	2529	tags=90%, list=13%, signal=78%	MT3/MT1M/MT1X/MT1F/MT2A/MT1E/MT1A/MT1H/MT1G
BP	GO:1990169	stress response to copper ion	10	-0.836677	-1.99061	0.000132396	0.00971491	0.00874583	2529	tags=90%, list=13%, signal=78%	MT3/MT1M/MT1X/MT1F/MT2A/MT1E/MT1A/MT1H/MT1G
BP	GO:0071294	cellular response to zinc ion	18	-0.711235	-1.99615	0.000285842	0.0160587	0.0144568	2529	tags=61%, list=13%, signal=53%	P2RX4/MT3/MT1M/MT1X/MT1F/CREB1/MT2A/MT1E/MT1A/MT1H/MT1G
BP	GO:0032570	response to progesterone	28	-0.642054	-2.02927	0.000218471	0.0132504	0.0119286	1600	tags=36%, list=8%, signal=33%	OXTR/GJB2/CYP1B1/YAP1/SREBF1/TXNIP/GABRB1/NKX2-2/FOS/FOSB
BP	GO:0061687	detoxification of inorganic compound	13	-0.809035	-2.07012	4.99349e-05	0.00507329	0.00456722	2529	tags=69%, list=13%, signal=60%	MT3/MT1M/MT1X/MT1F/MT2A/MT1E/MT1A/MT1H/MT1G

## Sheet: KEGG
	ID	Description	setSize	enrichmentScore	NES	pvalue	p.adjust	qvalue	rank	leading_edge	core_enrichment
hsa04961	hsa04961	Endocrine and other factor-regulated calcium reabsorption	41	0.533714	1.80656	0.000556825	0.0313408	0.0281649	1258	tags=29%, list=10%, signal=26%	ATP2B2/PRKCB/SLC8A2/PLCB1/ATP1A1/PRKCG/ATP1A3/ATP1B1/PRKACB/ATP2B1/PLCB4/GNAQ
hsa00190	hsa00190	Oxidative phosphorylation	91	0.44079	1.76672	0.000688118	0.0313408	0.0281649	2939	tags=47%, list=24%, signal=36%	COX7B/NDUFB3/COX6B1/COX7A2/NDUFA12/ATP6V0B/NDUFA1/PPA1/COX17/ATP6V1G1/NDUFB6/COX10/NDUFV2/COX11/NDUFB2/NDUFAB1/COX6C/COX5A/CYCS/NDUFB4/UQCRH/NDUFS5/COX7C/UQCRHL/NDUFA2/NDUFS4/ATP6V1G2/COX8A/UQCRC2/CYC1/UQCRB/NDUFA8/ATP6V0D1/ATP6V1E1/NDUFA4/UQCRQ/NDUFA7/SDHD/NDUFA6/UQCRC1/UQCRFS1/NDUFB11/ATP6V1F
hsa04925	hsa04925	Aldosterone synthesis and secretion	81	0.440885	1.72281	0.000748438	0.0313408	0.0281649	1841	tags=35%, list=15%, signal=30%	ATP2B2/ADCY1/PRKCB/NPPA/PLCB1/ATP1A1/PRKCG/ATP1A3/NR4A2/PRKCE/CACNA1G/ATP1B1/CALM2/PRKACB/ATP2B1/CAMK4/CAMK1/CAMK2B/CALM3/ITPR1/PLCB4/GNAQ/LDLR/ATF2/CAMK1G/CACNA1I/DAGLA/ATP1B3
hsa05020	hsa05020	Prion disease	205	0.371807	1.6717	0.000110559	0.00976154	0.00877235	2839	tags=40%, list=23%, signal=31%	GRIN2A/MAPK13/C1QA/C1QB/C1QC/TUBA1A/HSPA6/COX7B/TUBB2B/SLC25A4/NDUFB3/COX6B1/COX7A2/NDUFA12/TUBB3/PSMD7/NDUFA1/PSMA5/PPP3CA/PSMA6/EGR1/PRKACB/TUBA4A/NDUFB6/PSMD1/HSPA8/CYBB/HSPA5/PSMB2/PSMC6/NDUFV2/PPIF/TUBB/ITPR1/BAD/GRIN1/NDUFB2/NDUFAB1/COX6C/COX5A/KLC2/CYCS/NDUFB4/CCL5/UQCRH/NDUFS5/COX7C/UQCRHL/CSNK2A1/NDUFA2/NDUFS4/PSMA3/PSMC4/MAPK10/COX8A/ATF2/TUBB2A/PPP3CB/PRKCD/UQCRC2/CYC1/CAV2/UQCRB/GRIN3…
hsa05010	hsa05010	Alzheimer disease	290	0.356995	1.66686	1.46059e-05	0.00389087	0.00349659	2932	tags=37%, list=24%, signal=29%	GRIN2A/PLCB1/SNCA/TUBA1A/COX7B/RTN4/TUBB2B/SLC25A4/NDUFB3/COX6B1/NOS2/LPL/CALM2/COX7A2/NDUFA12/TUBB3/IRS1/PSMD7/NDUFA1/PSMA5/PPP3CA/PSMA6/PTGS2/APC2/PSENEN/TUBA4A/AXIN1/CDK5R1/NDUFB6/ATP2A2/PSMD1/CYBB/CALM3/PSMB2/PPID/PSMC6/NDUFV2/WNT4/PPIF/ADAM10/CHRM1/TUBB/SLC39A14/MAPT/ITPR1/PLCB4/BAD/GRIN1/NDUFB2/NDUFAB1/COX6C/COX5A/KLC2/CYCS/NDUFB4/UQCRH/GNAQ/BACE2/NDUFS5/BID/COX7C/UQCRHL/CSNK2A1/NDUFA2/NDUF…
hsa05012	hsa05012	Parkinson disease	206	0.369844	1.66451	0.000116556	0.00976154	0.00877235	3079	tags=41%, list=25%, signal=31%	SNCA/TUBA1A/COX7B/TUBB2B/SLC25A4/NDUFB3/COX6B1/CALM2/COX7A2/NDUFA12/TUBB3/PSMD7/NDUFA1/PSMA5/PSMA6/PRKACB/TUBA4A/NDUFB6/PSMD1/CAMK2B/CALM3/TXN/HSPA5/PSMB2/PSMC6/NDUFV2/PPIF/TUBB/SLC39A14/MAPT/ITPR1/NDUFB2/NDUFAB1/COX6C/COX5A/KLC2/CYCS/NDUFB4/UQCRH/NDUFS5/COX7C/UQCRHL/NDUFA2/NDUFS4/PSMA3/UBE2G1/PSMC4/MAPK10/COX8A/GPR37/TUBB2A/CAMK2A/UQCRC2/CYC1/SLC39A10/UQCRB/NDUFA8/SLC39A6/PSMD14/BCL2L1/XBP1/PSMD…
hsa05415	hsa05415	Diabetic cardiomyopathy	140	0.383103	1.63933	0.000662293	0.0313408	0.0281649	2932	tags=38%, list=24%, signal=29%	PRKCB/MAPK13/PLCB1/PRKCG/COX7B/SLC25A4/NDUFB3/COX6B1/COX7A2/NDUFA12/IRS1/NDUFA1/NDUFB6/ATP2A2/CYBB/CAMK2B/NDUFV2/PPIF/PLCB4/NDUFB2/NDUFAB1/COX6C/COX5A/NDUFB4/UQCRH/NDUFS5/COX7C/UQCRHL/NDUFA2/NDUFS4/MAPK10/GSR/COX8A/PPP1CA/PRKCD/CAMK2A/UQCRC2/CYC1/UQCRB/NDUFA8/PTEN/NDUFA4/UQCRQ/NDUFA7/NCF2/SDHD/NDUFA6/CYBA/PIK3R1/UQCRC1/UQCRFS1/SMAD3/NDUFB11
hsa05022	hsa05022	Pathways of neurodegeneration - multiple diseases	367	0.296276	1.41958	0.00122635	0.0456476	0.0410218	2773	tags=33%, list=23%, signal=26%	PRKCB/GRIN2A/MAPK13/PLCB1/SNCA/PRKCG/TUBA1A/STX1A/COX7B/TUBB2B/SLC25A4/NDUFB3/COX6B1/NOS2/CALM2/COX7A2/NDUFA12/TUBB3/PSMD7/NDUFA1/MAP1LC3A/PSMA5/PPP3CA/ATXN1/PSMA6/PTGS2/APC2/HIP1/ACTR10/TUBA4A/AXIN1/NEFM/CDK5R1/NDUFB6/ATP2A2/PSMD1/CYBB/CAMK2B/CALM3/HSPA5/PSMB2/PPID/PSMC6/NDUFV2/WNT4/PPIF/CHRM1/TUBB/NEFL/MAPT/ITPR1/PLCB4/BAD/GRIN1/PRPH/NDUFB2/NDUFAB1/COX6C/COX5A/KLC2/BDNF/CYCS/NDUFB4/UQCRH/GNAQ/N…
hsa05168	hsa05168	Herpes simplex virus 1 infection	332	-0.331403	-1.59706	2.32291e-05	0.00389087	0.00349659	2812	tags=32%, list=23%, signal=25%	ZNF254/ZNF543/ZNF688/ZNF302/IRAK4/ZNF398/ZNF419/IKBKG/ZNF716/TSC1/ZFP82/ZNF577/ZNF823/ZNF175/TNFRSF1A/ZNF614/ZNF783/ZNF586/ZNF471/JAK1/HLA-DPB1/ZNF195/ZNF333/ZNF7/ZNF34/ZNF135/ZNF84/ZNF585A/ZNF214/NFKB1/ZNF514/ZNF343/ZNF320/ZNF860/ZNF562/ZNF468/ZNF763/PML/ZNF611/ZFP37/CHUK/HCFC1/ZNF337/ZNF669/ZNF404/ZNF559/ZNF746/STAT2/ZNF454/ZNF426/ZNF20/TBK1/EIF2B5/EIF2B4/ZNF3/ZNF283/HLA-DOA/EIF2AK2/HLA-DPA1/ZN…
