# Supplementary material for: Identification of pericyte loss and neutrophils infiltration in Focal cortical dysplasia by Integrated Analysis of Single-Cell and Bulk RNA-Sequencing
Source: Research Square preprint supplement (doi:10.21203/rs.3.rs-4253627/v1), 2024-04-30
Supplement: Supplementary file 3 [file 2dc174fce0319bb46fe8d25f.xlsx]

## Sheet: GO
ONTOLOGY	ID	Description	GeneRatio	BgRatio	pvalue	p.adjust	qvalue	geneID	Count
BP	GO:0010038	response to metal ion	31/595	360/18903	4.44311e-07	0.00113893	0.00108605	ADCY1/ANXA11/B2M/CPNE2/D2HGDH/FOSB/JUND/LGMN/LONP1/MAPK3/MT1A/MT1E/MT1F/MT1G/MT1H/MT1X/NFE2L2/PLCG2/PLSCR1/PTK2B/RASAL1/RYR1/SLC25A12/SMPD3/TNNT2/WNT5A/ERCC1/HSPA5/NFATC4/P2RX7/PGAM2	31
BP	GO:0044344	cellular response to fibroblast growth factor stimulus	16/595	114/18903	5.63049e-07	0.00113893	0.00108605	APLN/CCL2/CEP57/CRKL/EXT2/FGF12/FGF17/FGF20/FGFR3/GPC1/ITGB1BP1/SOS1/SPRY2/SULF1/WNT5A/KLB	16
BP	GO:0097501	stress response to metal ion	7/595	19/18903	1.07099e-06	0.00113893	0.00108605	MT1A/MT1E/MT1F/MT1G/MT1H/MT1X/HSPA5	7
BP	GO:0071774	response to fibroblast growth factor	16/595	120/18903	1.13852e-06	0.00113893	0.00108605	APLN/CCL2/CEP57/CRKL/EXT2/FGF12/FGF17/FGF20/FGFR3/GPC1/ITGB1BP1/SOS1/SPRY2/SULF1/WNT5A/KLB	16
BP	GO:0071248	cellular response to metal ion	21/595	198/18903	1.2377e-06	0.00113893	0.00108605	ADCY1/B2M/CPNE2/FOSB/JUND/LGMN/MAPK3/MT1A/MT1E/MT1F/MT1G/MT1H/MT1X/NFE2L2/PLCG2/RASAL1/RYR1/SMPD3/WNT5A/HSPA5/NFATC4	21
BP	GO:0008543	fibroblast growth factor receptor signaling pathway	13/595	87/18903	3.15814e-06	0.00190405	0.00181564	APLN/CEP57/CRKL/FGF12/FGF17/FGF20/FGFR3/GPC1/SOS1/SPRY2/SULF1/WNT5A/KLB	13
BP	GO:0071241	cellular response to inorganic substance	22/595	229/18903	3.6313e-06	0.00190405	0.00181564	ADCY1/B2M/BLM/CPNE2/FOSB/JUND/LGMN/MAPK3/MT1A/MT1E/MT1F/MT1G/MT1H/MT1X/NFE2L2/PLCG2/RASAL1/RYR1/SMPD3/WNT5A/HSPA5/NFATC4	22
BP	GO:0010273	detoxification of copper ion	6/595	15/18903	3.7245e-06	0.00190405	0.00181564	MT1A/MT1E/MT1F/MT1G/MT1H/MT1X	6
BP	GO:1990169	stress response to copper ion	6/595	15/18903	3.7245e-06	0.00190405	0.00181564	MT1A/MT1E/MT1F/MT1G/MT1H/MT1X	6
BP	GO:0021542	dentate gyrus development	6/595	16/18903	5.80076e-06	0.00266893	0.00254501	BTG2/EMX2/FEZF2/NEUROD6/PROX1/TMEM108	6
BP	GO:0061687	detoxification of inorganic compound	6/595	18/18903	1.27423e-05	0.00532974	0.00508227	MT1A/MT1E/MT1F/MT1G/MT1H/MT1X	6
BP	GO:0071280	cellular response to copper ion	7/595	27/18903	1.51566e-05	0.00581128	0.00554145	MT1A/MT1E/MT1F/MT1G/MT1H/MT1X/NFE2L2	7
BP	GO:0048247	lymphocyte chemotaxis	10/595	65/18903	3.33205e-05	0.0117929	0.0112453	CCL2/CCL3/CCL3L1/CCL3L3/CCL4L1/CH25H/HSD3B7/PTK2B/WNT5A/WNK1	10
BP	GO:0048663	neuron fate commitment	10/595	68/18903	4.97302e-05	0.0163435	0.0155846	EHMT2/EYA1/FEZF2/FKBP8/NRG1/PROX1/BMP4/NKX2-2/OLIG1/OLIG2	10
BP	GO:0051592	response to calcium ion	15/595	147/18903	6.34224e-05	0.0194538	0.0185505	ADCY1/ANXA11/CPNE2/FOSB/JUND/LGMN/PLCG2/PTK2B/RASAL1/RYR1/SLC25A12/TNNT2/WNT5A/HSPA5/P2RX7	15
BP	GO:0071294	cellular response to zinc ion	6/595	24/18903	7.86341e-05	0.0226122	0.0215623	MT1A/MT1E/MT1F/MT1G/MT1H/MT1X	6
BP	GO:0001503	ossification	29/595	429/18903	0.000101725	0.0275315	0.0262532	CCL3/CDH11/CTNNBIP1/CTSK/DNAJC13/EBP/EXT2/FBL/FBN2/FGFR3/FSTL3/JAG1/JUND/KLF10/LTBP3/MAPK3/MEF2D/OMD/PDLIM7/PPARGC1B/PTK2B/RYR1/SMPD3/WNT5A/YAP1/ZBTB40/BMP4/P2RX7/WNT3	29
BP	GO:0071276	cellular response to cadmium ion	7/595	37/18903	0.00013372	0.0341803	0.0325932	MAPK3/MT1A/MT1E/MT1F/MT1G/MT1H/MT1X	7
BP	GO:0010043	response to zinc ion	8/595	52/18903	0.000203848	0.0493635	0.0470714	D2HGDH/MT1A/MT1E/MT1F/MT1G/MT1H/MT1X/P2RX7	8

## Sheet: KEGG
ID	Description	GeneRatio	BgRatio	pvalue	p.adjust	qvalue	geneID	Count
hsa05163	Human cytomegalovirus infection	21/300	225/8644	3.38408e-05	0.00991535	0.00876298	ADCY1/B2M/BID/CCL2/CCL3/CCL3L1/CCL3L3/CCL4L1/CDK4/CRKL/E2F3/MAPK12/MAPK3/PTK2B/SOS1/ADCY4/ARHGEF1/CREB5/GNG4/NFATC4/PPP3R1	21
hsa04142	Lysosome	14/300	132/8644	0.000186002	0.0272493	0.0240823	ABCB9/AP3B2/CTSK/DNASE2/GALC/GLA/GNPTAB/HEXB/LAPTM4B/LGMN/NCOA7/SGSH/AGA/IDUA	14
hsa04020	Calcium signaling pathway	20/300	253/8644	0.00049365	0.0482132	0.0426098	ADCY1/CACNA1F/CACNA1I/FGF17/FGF20/FGFR3/GNA15/GRIN3A/MYLK/PLCG2/PTK2B/RYR1/VEGFB/ADCY4/CYSLTR1/GNAL/NFATC4/P2RX7/PPP3R1/TGFA	20
