# Supplementary material for: Identification of pericyte loss and neutrophils infiltration in Focal cortical dysplasia by Integrated Analysis of Single-Cell and Bulk RNA-Sequencing
Source: Research Square preprint supplement (doi:10.21203/rs.3.rs-4253627/v1), 2024-04-30
Supplement: Supplementary file 4 [file 9b14f6186e482554af091f31.xlsx]

## Sheet: Sheet1
Dataset	GSE201048	GSE62019	GSE97365
Organism	Homo sapiens	Homo sapiens	Homo sapiens
Experiment type	Expression profiling by high throughput sequencing	Expression profiling by array	Expression profiling by array
Platform	GPL18573Illumina NextSeq 500 (Homo sapiens)	GPL10558Illumina HumanHT-12 V4.0 expression beadchip	GPL8786 [miRNA-1] Affymetrix Multispecies miRNA-1 Array
Tissue	Brain	Brain	Brain
No. Samples associated with epilepsy	Total: 11	Total: 11	Total: 14
	(11 epilepsy samples from 6 patients)	(3 tuberous sclerosis with epilepsy samples + 3 normal control samples + 5 focal cortical dysplasia with epilepsy samples)	(9 focal cortical dysplasia with epilepsy samples + 4 normal control samples
Reference	PMID35739273	PMID35945307	PMID29461643
