# Supplementary material for: Identification of pericyte loss and neutrophils infiltration in Focal cortical dysplasia by Integrated Analysis of Single-Cell and Bulk RNA-Sequencing
Source: Research Square preprint supplement (doi:10.21203/rs.3.rs-4253627/v1), 2024-04-30
Supplement: Supplementary file 5 [file e3e62520865e49326a9b0991.xlsx]

## Sheet: Table S3.1
Table S3.1 GO enrichment results based on up-regulated expressed genes (Smooth Muscle Cell vs other cells) in scRNA-seq (GSE201048)
ONTOLOGY	ID	Description	GeneRatio	BgRatio	pvalue	p.adjust	qvalue	geneID	Count
BP	GO:0042773	ATP synthesis coupled electron transport	48/1397	101/18903	8.77593e-28	2.48227e-24	2.02216e-24	COX4I2/COX7A1/COX6C/NDUFB7/COX5B/COX6A1/COX7A2/NDUFB10/COX8A/NDUFA1/NDUFB9/COX7B/NDUFC1/NDUFB2/CHCHD2/NDUFC2/NDUFA12/CYC1/PARK7/NDUFS4/NDUFB4/NDUFB6/NDUFAB1/DNAJC15/UQCRQ/SDHD/NDUFS7/UQCRC1/NDUFA5/NDUFA6/NDUFB1/NDUFA8/NDUFS5/NDUFB3/UQCR10/NDUFS6/NDUFS1/NDUFS8/COX6B1/NDUFV2/COX7C/NDUFA3/UQCRC2/NDUFB5/NDUFS3/ISCU/UQCRH/GHITM	48
BP	GO:0042775	mitochondrial ATP synthesis coupled electron transport	48/1397	101/18903	8.77593e-28	2.48227e-24	2.02216e-24	COX4I2/COX7A1/COX6C/NDUFB7/COX5B/COX6A1/COX7A2/NDUFB10/COX8A/NDUFA1/NDUFB9/COX7B/NDUFC1/NDUFB2/CHCHD2/NDUFC2/NDUFA12/CYC1/PARK7/NDUFS4/NDUFB4/NDUFB6/NDUFAB1/DNAJC15/UQCRQ/SDHD/NDUFS7/UQCRC1/NDUFA5/NDUFA6/NDUFB1/NDUFA8/NDUFS5/NDUFB3/UQCR10/NDUFS6/NDUFS1/NDUFS8/COX6B1/NDUFV2/COX7C/NDUFA3/UQCRC2/NDUFB5/NDUFS3/ISCU/UQCRH/GHITM	48
BP	GO:0019646	aerobic electron transport chain	45/1397	93/18903	1.50238e-26	2.833e-23	2.30787e-23	COX4I2/COX7A1/COX6C/NDUFB7/COX5B/COX6A1/COX7A2/NDUFB10/COX8A/NDUFA1/NDUFB9/COX7B/NDUFC1/NDUFB2/NDUFC2/CYC1/PARK7/NDUFS4/NDUFB4/NDUFB6/NDUFAB1/DNAJC15/UQCRQ/SDHD/NDUFS7/UQCRC1/NDUFA5/NDUFA6/NDUFB1/NDUFA8/NDUFS5/NDUFB3/UQCR10/NDUFS6/NDUFS1/NDUFS8/COX6B1/NDUFV2/COX7C/NDUFA3/UQCRC2/NDUFB5/NDUFS3/ISCU/UQCRH	45
BP	GO:0009060	aerobic respiration	64/1397	194/18903	1.34275e-25	1.89898e-22	1.54699e-22	NUPR1/COX4I2/COX7A1/COX6C/NDUFB7/COX5B/NDUFA13/COX6A1/COX7A2/NDUFB10/COX8A/NDUFA1/NDUFB9/COX7B/NDUFC1/NDUFB2/BLOC1S1/CHCHD2/NDUFC2/SUCLG1/NDUFA12/CYC1/PARK7/NDUFS4/NDUFB4/NDUFB6/NDUFAB1/DNAJC15/UQCRQ/SDHD/NDUFA11/NDUFS7/PDHB/UQCRC1/NDUFA5/ARL2/NDUFA6/NDUFB1/NDUFA8/MDH1/NDUFS5/NDUFB3/UQCR10/NDUFS6/NDUFS1/MRPS36/CAT/NDUFB11/NDUFS8/SUCLA2/COX6B1/NDUFV2/COX7C/NDUFA3/IDH3G/UQCRC2/NDUFB5/STOML2/NDUFS3/…	64
BP	GO:0006119	oxidative phosphorylation	55/1397	147/18903	3.03245e-25	3.43092e-22	2.79497e-22	NUPR1/COX4I2/COX7A1/COX6C/NDUFB7/COX5B/NDUFA13/COX6A1/COX7A2/NDUFB10/COX8A/NDUFA1/NDUFB9/COX7B/NDUFC1/NDUFB2/CHCHD2/NDUFC2/NDUFA12/CYC1/PARK7/NDUFS4/NDUFB4/NDUFB6/NDUFAB1/DNAJC15/UQCRQ/SDHD/NDUFA11/NDUFS7/UQCRC1/NDUFA5/NDUFA6/NDUFB1/NDUFA8/NDUFS5/NDUFB3/UQCR10/NDUFS6/NDUFS1/NDUFB11/NDUFS8/COX6B1/NDUFV2/COX7C/NDUFA3/UQCRC2/NDUFB5/STOML2/NDUFS3/CHCHD10/ISCU/UQCRH/GHITM/RHOA	55
BP	GO:0022904	respiratory electron transport chain	49/1397	122/18903	3.00042e-24	2.82889e-21	2.30453e-21	COX4I2/COX7A1/COX6C/NDUFB7/COX5B/COX6A1/COX7A2/NDUFB10/COX8A/NDUFA1/NDUFB9/COX7B/NDUFC1/NDUFB2/CHCHD2/NDUFC2/NDUFA12/CYC1/PARK7/NDUFS4/NDUFB4/NDUFB6/NDUFAB1/DNAJC15/UQCRQ/SDHD/NDUFS7/UQCRC1/NDUFA5/NDUFA6/NDUFB1/NDUFA8/NDUFS5/NDUFB3/UQCR10/NDUFS6/NDUFS1/ETFB/NDUFS8/COX6B1/NDUFV2/COX7C/NDUFA3/UQCRC2/NDUFB5/NDUFS3/ISCU/UQCRH/GHITM	49
BP	GO:0045333	cellular respiration	68/1397	240/18903	7.71215e-23	6.23252e-20	5.07726e-20	NFATC4/NUPR1/COX4I2/COX7A1/COX6C/NDUFB7/COX5B/NDUFA13/COX6A1/COX7A2/NDUFB10/COX8A/NDUFA1/NDUFB9/COX7B/NDUFC1/NDUFB2/BLOC1S1/CHCHD2/NDUFC2/SUCLG1/NDUFA12/CYC1/PARK7/NDUFS4/NDUFB4/NDUFB6/CISD1/NDUFAB1/DNAJC15/UQCRQ/SDHD/NDUFA11/NDUFS7/PDHB/UQCRC1/NDUFA5/ARL2/NDUFA6/NDUFB1/NDUFA8/MDH1/NDUFS5/NDUFB3/UQCR10/NDUFS6/NDUFS1/MRPS36/CAT/NDUFB11/ETFB/NDUFS8/SUCLA2/COX6B1/NDUFV2/COX7C/PIK3CA/NDUFA3/IDH3G/UQC…	68
BP	GO:0022900	electron transport chain	55/1397	176/18903	6.48649e-21	4.58676e-18	3.73656e-18	COX4I2/COX7A1/COX6C/NDUFB7/COX5B/P4HA2/COX6A1/COX7A2/NDUFB10/COX8A/NDUFA1/NDUFB9/COX7B/ADH5/NDUFC1/NDUFB2/CHCHD2/NDUFC2/NDUFA12/CYC1/PARK7/NDUFS4/NDUFB4/NDUFB6/NDUFAB1/DNAJC15/UQCRQ/SDHD/NDUFS7/UQCRC1/NDUFA5/NDUFA6/NDUFB1/NDUFA8/CYB5A/NDUFS5/NDUFB3/UQCR10/NDUFS6/NDUFS1/COX11/ETFB/NDUFS8/COX6B1/NDUFV2/COX7C/AKR7A2/NDUFA3/UQCRC2/NDUFB5/NDUFS3/ASPH/ISCU/UQCRH/GHITM	55
BP	GO:0015980	energy derivation by oxidation of organic compounds	76/1397	333/18903	3.36582e-19	2.1156e-16	1.72346e-16	IGF2/NFATC4/NUPR1/COX4I2/COX7A1/PID1/COX6C/NDUFB7/COX5B/NDUFA13/COX6A1/COX7A2/NDUFB10/COX8A/NDUFA1/NDUFB9/COX7B/NDUFC1/NDUFB2/BLOC1S1/CHCHD2/NDUFC2/SUCLG1/NDUFA12/CYC1/PFKM/PARK7/NDUFS4/NDUFB4/NDUFB6/CISD1/NDUFAB1/DNAJC15/UQCRQ/SDHD/NDUFA11/NDUFS7/PDHB/UQCRC1/NDUFA5/ARL2/NDUFA6/NDUFB1/NDUFA8/MDH1/NDUFS5/NDUFB3/UQCR10/NDUFS6/NDUFS1/MRPS36/CAT/ACADVL/NDUFB11/ETFB/NDUFS8/PHKB/SUCLA2/COX6B1/NDUFV2/PP…	76
BP	GO:0006120	mitochondrial electron transport, NADH to ubiquinone	28/1397	51/18903	6.05608e-19	3.42592e-16	2.7909e-16	NDUFB7/NDUFB10/NDUFA1/NDUFB9/NDUFC1/NDUFB2/NDUFC2/PARK7/NDUFS4/NDUFB4/NDUFB6/NDUFAB1/DNAJC15/NDUFS7/NDUFA5/NDUFA6/NDUFB1/NDUFA8/NDUFS5/NDUFB3/NDUFS6/NDUFS1/NDUFS8/NDUFV2/NDUFA3/NDUFB5/NDUFS3/ISCU	28
BP	GO:0042776	proton motive force-driven mitochondrial ATP synthesis	31/1397	67/18903	5.42004e-18	2.78738e-15	2.27071e-15	NDUFB7/NDUFA13/NDUFB10/NDUFA1/NDUFB9/NDUFC1/NDUFB2/NDUFC2/NDUFA12/NDUFS4/NDUFB4/NDUFB6/NDUFAB1/SDHD/NDUFA11/NDUFS7/NDUFA5/NDUFA6/NDUFB1/NDUFA8/NDUFS5/NDUFB3/NDUFS6/NDUFS1/NDUFB11/NDUFS8/NDUFV2/NDUFA3/NDUFB5/STOML2/NDUFS3	31
BP	GO:0010257	NADH dehydrogenase complex assembly	28/1397	59/18903	9.53033e-17	4.14716e-14	3.37844e-14	NDUFB7/NDUFA13/NDUFB10/NDUFA1/NDUFB9/NDUFC1/NDUFB2/NDUFC2/NDUFA12/NDUFS4/NDUFB4/NDUFB6/NDUFAB1/NDUFA11/NDUFS7/NDUFA5/NDUFA6/NDUFAF3/NDUFB1/NDUFA8/NDUFS5/NDUFB3/NDUFS1/NDUFB11/NDUFS8/NDUFA3/NDUFB5/NDUFS3	28
BP	GO:0032981	mitochondrial respiratory chain complex I assembly	28/1397	59/18903	9.53033e-17	4.14716e-14	3.37844e-14	NDUFB7/NDUFA13/NDUFB10/NDUFA1/NDUFB9/NDUFC1/NDUFB2/NDUFC2/NDUFA12/NDUFS4/NDUFB4/NDUFB6/NDUFAB1/NDUFA11/NDUFS7/NDUFA5/NDUFA6/NDUFAF3/NDUFB1/NDUFA8/NDUFS5/NDUFB3/NDUFS1/NDUFB11/NDUFS8/NDUFA3/NDUFB5/NDUFS3	28
BP	GO:0015986	proton motive force-driven ATP synthesis	31/1397	76/18903	4.53306e-16	1.83168e-13	1.49216e-13	NDUFB7/NDUFA13/NDUFB10/NDUFA1/NDUFB9/NDUFC1/NDUFB2/NDUFC2/NDUFA12/NDUFS4/NDUFB4/NDUFB6/NDUFAB1/SDHD/NDUFA11/NDUFS7/NDUFA5/NDUFA6/NDUFB1/NDUFA8/NDUFS5/NDUFB3/NDUFS6/NDUFS1/NDUFB11/NDUFS8/NDUFV2/NDUFA3/NDUFB5/STOML2/NDUFS3	31
BP	GO:0031589	cell-substrate adhesion	74/1397	369/18903	1.81858e-15	6.85848e-13	5.5872e-13	ITGA10/LAMC1/NID1/FN1/LAMB2/PHLDB2/ITGA1/EDIL3/PTPRK/EPDR1/SGCE/DLC1/ECM2/LAMC3/PARVA/CTTN/ITGA7/NTN4/AJUBA/FERMT2/EMP2/ATP1B2/COL5A3/FBLN1/VCL/CCDC80/PTK2/BCAM/ACTN4/JAG1/PTEN/RADIL/FLNA/UTRN/CD63/RRAS/ANGPT1/DAG1/ITGB1/DOCK1/EFEMP2/THBS1/ROCK2/JAM3/ADAMTS9/SORBS3/ARHGAP6/PTPRA/RSU1/EMILIN1/ITGB1BP1/TRIP6/ACTN1/ITGB5/ARL2/ACTG1/ILK/HSD17B12/SLC9A1/MACF1/JUP/AXL/ZYX/BCL2/TLN1/ARHGEF7/PKD1/ABL1/BC…	74
BP	GO:0003012	muscle system process	82/1397	455/18903	3.03826e-14	1.07421e-11	8.75099e-12	ATP1A2/RGS4/TTN/KCNE4/MYLK/APBB2/PDE5A/TRPC3/EDNRA/MIR145/HEY2/GPER1/CAV1/CALD1/DMD/SNTB1/TPM2/PRKG1/PLCE1/CTTN/ARHGAP42/CACNA1C/KCNJ8/ABCC9/TBX3/SYNM/ADORA2B/GJC1/TBX2/SSTR2/MYL9/HRC/IGFBP5/EDNRB/TBXA2R/FLNA/ADRA2C/UTRN/TPM1/SGCA/CACNA2D1/ANXA6/FXYD1/SMTN/CD38/AGT/CKMT2/C12orf57/DAG1/CALM2/MYL6/ALDOA/ROCK2/FBXO32/ACTA2/LMOD1/MAP2K6/LMNA/PDE4D/TPM4/TMEM38B/SORBS2/SSPN/PPP1R12B/SLC9A1/CAMK2G/FOXP1…	82
BP	GO:0006936	muscle contraction	69/1397	351/18903	4.63045e-14	1.54085e-11	1.25524e-11	ATP1A2/TTN/KCNE4/MYLK/APBB2/PDE5A/EDNRA/MIR145/GPER1/CAV1/CALD1/DMD/SNTB1/TPM2/PRKG1/PLCE1/CTTN/ARHGAP42/CACNA1C/KCNJ8/ABCC9/TBX3/SYNM/ADORA2B/GJC1/TBX2/SSTR2/MYL9/HRC/EDNRB/TBXA2R/FLNA/ADRA2C/UTRN/TPM1/SGCA/CACNA2D1/ANXA6/FXYD1/SMTN/CD38/AGT/CKMT2/C12orf57/CALM2/MYL6/ALDOA/ROCK2/ACTA2/LMOD1/MAP2K6/PDE4D/TPM4/TMEM38B/SSPN/PPP1R12B/SLC9A1/JUP/SOD1/PIK3CA/GSTO1/MYL6B/SMAD5/SRI/GSN/TMOD3/ATP2A2/ASPH…	69
BP	GO:0033108	mitochondrial respiratory chain complex assembly	33/1397	99/18903	5.30354e-14	1.66679e-11	1.35783e-11	NDUFB7/NDUFA13/NDUFB10/NDUFA1/NDUFB9/NDUFC1/NDUFB2/NDUFC2/NDUFA12/NDUFS4/NDUFB4/NDUFB6/NDUFAB1/NDUFA11/NDUFS7/NDUFA5/NDUFA6/COX14/NDUFAF3/NDUFB1/NDUFA8/NDUFS5/NDUFB3/NDUFS1/NDUFB11/COA3/NDUFS8/PET100/COX17/COA5/NDUFA3/NDUFB5/NDUFS3	33
BP	GO:0007160	cell-matrix adhesion	53/1397	238/18903	2.51951e-13	7.50152e-11	6.11104e-11	ITGA10/NID1/FN1/PHLDB2/ITGA1/PTPRK/EPDR1/SGCE/DLC1/ECM2/CTTN/ITGA7/AJUBA/FERMT2/EMP2/COL5A3/VCL/PTK2/BCAM/JAG1/PTEN/UTRN/CD63/RRAS/DAG1/ITGB1/EFEMP2/THBS1/ROCK2/JAM3/ADAMTS9/ARHGAP6/PTPRA/EMILIN1/ITGB1BP1/TRIP6/ACTN1/ITGB5/ACTG1/ILK/SLC9A1/MACF1/JUP/ZYX/BCL2/TLN1/ARHGEF7/PKD1/ABL1/BCAS3/BCL6/NF1/RHOA	53
BP	GO:0042060	wound healing	78/1397	442/18903	4.08132e-13	1.1544e-10	9.40422e-11	F3/PEAR1/TFPI/FN1/PHLDB2/MYLK/SLC12A2/PDGFRB/SMOC2/DGKB/CAV1/PRKG1/MCAM/CD9/AJUBA/FERMT2/C1QTNF1/MYL9/FBLN1/VCL/CD151/FOXC2/FKBP10/PTK2/TBXA2R/TIMP1/TSPAN8/PTEN/FLNA/ADRA2C/TPM1/ANXA6/F10/SERPING1/PAPSS2/YAP1/SLC7A11/FGF1/CD59/DAG1/ITGB1/MYH9/THBS1/GPR4/ANO6/DDR2/DGKH/CADM4/AHNAK/ACTA2/DST/MYL12A/PRDX2/EMILIN1/RHOC/CHMP5/PROS1/ACTG1/ILK/ACTB/CHMP2A/DCBLD2/MACF1/ANXA2/CNN2/AXL/C1GALT1C1/TLN1/VKORC…	78
BP	GO:0006754	ATP biosynthetic process	33/1397	106/18903	4.77164e-13	1.28539e-10	1.04713e-10	PID1/NDUFB7/NDUFA13/ALDOA/NDUFB10/NDUFA1/NDUFB9/NDUFC1/NDUFB2/NDUFC2/NDUFA12/NDUFS4/NDUFB4/NDUFB6/NDUFAB1/SDHD/NDUFA11/NDUFS7/NDUFA5/NDUFA6/NDUFB1/NDUFA8/NDUFS5/NDUFB3/NDUFS6/NDUFS1/NDUFB11/NDUFS8/NDUFV2/NDUFA3/NDUFB5/STOML2/NDUFS3	33
BP	GO:0009142	nucleoside triphosphate biosynthetic process	37/1397	134/18903	1.14856e-12	2.95337e-10	2.40593e-10	PID1/NDUFB7/NDUFA13/ALDOA/NDUFB10/NDUFA1/NDUFB9/NDUFC1/NDUFB2/NDUFC2/NDUFA12/NDUFS4/NDUFB4/NDUFB6/NDUFAB1/SDHD/NDUFA11/NDUFS7/NDUFA5/NDUFA6/NDUFB1/NDUFA8/NDUFS5/NDUFB3/NDUFS6/NDUFS1/NDUFB11/TBPL1/NDUFS8/NME3/NDUFV2/AK3/NDUFA3/NDUFB5/STOML2/NDUFS3/AK1	37
BP	GO:0009206	purine ribonucleoside triphosphate biosynthetic process	34/1397	117/18903	1.9218e-12	4.72678e-10	3.85063e-10	PID1/NDUFB7/NDUFA13/ALDOA/NDUFB10/NDUFA1/NDUFB9/NDUFC1/NDUFB2/NDUFC2/NDUFA12/NDUFS4/NDUFB4/NDUFB6/NDUFAB1/SDHD/NDUFA11/NDUFS7/NDUFA5/NDUFA6/NDUFB1/NDUFA8/NDUFS5/NDUFB3/NDUFS6/NDUFS1/NDUFB11/NDUFS8/NME3/NDUFV2/NDUFA3/NDUFB5/STOML2/NDUFS3	34
BP	GO:0009150	purine ribonucleotide metabolic process	77/1397	447/18903	2.05451e-12	4.84265e-10	3.94502e-10	PRKAA2/ATP1A2/PDE5A/PDE8B/PDE7B/GUCY1A2/NUPR1/PDE2A/PID1/SULT1A1/ADCY6/PAPSS2/NDUFB7/NDUFA13/ALDOA/TECR/NDUFB10/NDUFA1/ADCY9/NDUFB9/ACSL3/RORA/NDUFC1/NDUFB2/APP/NDUFC2/SUCLG1/ZBTB20/NDUFA12/PFKM/EPHA2/GAPDH/ADCY3/PDE4D/NDUFS4/NDUFB4/NDUFB6/PGAM1/NDUFAB1/SDHD/NDUFA11/NDUFS7/PDHB/NDUFA5/ARL2/NDUFA6/NDUFB1/NDUFA8/BAD/NDUFS5/HINT1/NDUFB3/NDUFS6/NDUFS1/HSD17B12/PDE8A/NDUFB11/TPI1/ELOVL5/NDUFS8/NUDT4/N…	77
BP	GO:0009145	purine nucleoside triphosphate biosynthetic process	34/1397	118/18903	2.51058e-12	5.68095e-10	4.62793e-10	PID1/NDUFB7/NDUFA13/ALDOA/NDUFB10/NDUFA1/NDUFB9/NDUFC1/NDUFB2/NDUFC2/NDUFA12/NDUFS4/NDUFB4/NDUFB6/NDUFAB1/SDHD/NDUFA11/NDUFS7/NDUFA5/NDUFA6/NDUFB1/NDUFA8/NDUFS5/NDUFB3/NDUFS6/NDUFS1/NDUFB11/NDUFS8/NME3/NDUFV2/NDUFA3/NDUFB5/STOML2/NDUFS3	34
BP	GO:0046034	ATP metabolic process	48/1397	217/18903	4.37159e-12	9.51157e-10	7.74851e-10	PRKAA2/ATP1A2/NUPR1/PID1/NDUFB7/NDUFA13/ALDOA/NDUFB10/NDUFA1/NDUFB9/NDUFC1/NDUFB2/APP/NDUFC2/ZBTB20/NDUFA12/PFKM/GAPDH/NDUFS4/NDUFB4/NDUFB6/PGAM1/NDUFAB1/SDHD/NDUFA11/NDUFS7/NDUFA5/ARL2/NDUFA6/NDUFB1/NDUFA8/BAD/NDUFS5/NDUFB3/NDUFS6/NDUFS1/NDUFB11/TPI1/NDUFS8/GPI/NDUFV2/FIS1/NDUFA3/NDUFB5/STOML2/NDUFS3/AK1/PRKAA1	48
BP	GO:0009205	purine ribonucleoside triphosphate metabolic process	51/1397	242/18903	6.53272e-12	1.36873e-09	1.11502e-09	PRKAA2/ATP1A2/NUPR1/PID1/NDUFB7/NDUFA13/ALDOA/NDUFB10/NDUFA1/NDUFB9/NDUFC1/NDUFB2/APP/NDUFC2/ZBTB20/NDUFA12/PFKM/GAPDH/NDUFS4/NDUFB4/NDUFB6/PGAM1/NDUFAB1/SDHD/NDUFA11/NDUFS7/NDUFA5/ARL2/NDUFA6/NDUFB1/NDUFA8/BAD/NDUFS5/NDUFB3/NDUFS6/NDUFS1/NDUFB11/TPI1/NDUFS8/NME3/GPI/NDUFV2/FIS1/AK3/NDUFA3/NDUFB5/STOML2/NDUFS3/AK1/PRKAA1/RHOA	51
BP	GO:0006163	purine nucleotide metabolic process	79/1397	476/18903	7.43879e-12	1.5029e-09	1.22432e-09	PRKAA2/ATP1A2/PDE5A/PDE8B/PDE7B/GUCY1A2/NUPR1/ADORA2B/PDE2A/PID1/SULT1A1/ADCY6/PAPSS2/NDUFB7/NDUFA13/ALDOA/TECR/NDUFB10/NDUFA1/ADCY9/NDUFB9/ACSL3/RORA/NDUFC1/NDUFB2/APP/NDUFC2/SUCLG1/ZBTB20/NDUFA12/PFKM/EPHA2/GAPDH/ADCY3/PDE4D/NDUFS4/NDUFB4/NDUFB6/PGAM1/NDUFAB1/SDHD/NDUFA11/NDUFS7/PDHB/NDUFA5/PRPSAP1/ARL2/NDUFA6/NDUFB1/NDUFA8/BAD/NDUFS5/HINT1/NDUFB3/NDUFS6/NDUFS1/HSD17B12/PDE8A/NDUFB11/TPI1/ELOVL…	79
BP	GO:0009201	ribonucleoside triphosphate biosynthetic process	34/1397	123/18903	9.0905e-12	1.77327e-09	1.44458e-09	PID1/NDUFB7/NDUFA13/ALDOA/NDUFB10/NDUFA1/NDUFB9/NDUFC1/NDUFB2/NDUFC2/NDUFA12/NDUFS4/NDUFB4/NDUFB6/NDUFAB1/SDHD/NDUFA11/NDUFS7/NDUFA5/NDUFA6/NDUFB1/NDUFA8/NDUFS5/NDUFB3/NDUFS6/NDUFS1/NDUFB11/NDUFS8/NME3/NDUFV2/NDUFA3/NDUFB5/STOML2/NDUFS3	34
BP	GO:0009144	purine nucleoside triphosphate metabolic process	51/1397	247/18903	1.45835e-11	2.74997e-09	2.24024e-09	PRKAA2/ATP1A2/NUPR1/PID1/NDUFB7/NDUFA13/ALDOA/NDUFB10/NDUFA1/NDUFB9/NDUFC1/NDUFB2/APP/NDUFC2/ZBTB20/NDUFA12/PFKM/GAPDH/NDUFS4/NDUFB4/NDUFB6/PGAM1/NDUFAB1/SDHD/NDUFA11/NDUFS7/NDUFA5/ARL2/NDUFA6/NDUFB1/NDUFA8/BAD/NDUFS5/NDUFB3/NDUFS6/NDUFS1/NDUFB11/TPI1/NDUFS8/NME3/GPI/NDUFV2/FIS1/AK3/NDUFA3/NDUFB5/STOML2/NDUFS3/AK1/PRKAA1/RHOA	51
BP	GO:0009259	ribonucleotide metabolic process	77/1397	466/18903	1.72115e-11	3.07386e-09	2.50409e-09	PRKAA2/ATP1A2/PDE5A/PDE8B/PDE7B/GUCY1A2/NUPR1/PDE2A/PID1/SULT1A1/ADCY6/PAPSS2/NDUFB7/NDUFA13/ALDOA/TECR/NDUFB10/NDUFA1/ADCY9/NDUFB9/ACSL3/RORA/NDUFC1/NDUFB2/APP/NDUFC2/SUCLG1/ZBTB20/NDUFA12/PFKM/EPHA2/GAPDH/ADCY3/PDE4D/NDUFS4/NDUFB4/NDUFB6/PGAM1/NDUFAB1/SDHD/NDUFA11/NDUFS7/PDHB/NDUFA5/ARL2/NDUFA6/NDUFB1/NDUFA8/BAD/NDUFS5/HINT1/NDUFB3/NDUFS6/NDUFS1/HSD17B12/PDE8A/NDUFB11/TPI1/ELOVL5/NDUFS8/NUDT4/N…	77
BP	GO:0019693	ribose phosphate metabolic process	78/1397	475/18903	1.73879e-11	3.07386e-09	2.50409e-09	PRKAA2/ATP1A2/PDE5A/PDE8B/PDE7B/GUCY1A2/NUPR1/PDE2A/PID1/SULT1A1/ADCY6/PAPSS2/NDUFB7/NDUFA13/ALDOA/TECR/NDUFB10/NDUFA1/ADCY9/NDUFB9/ACSL3/RORA/NDUFC1/NDUFB2/APP/NDUFC2/SUCLG1/ZBTB20/NDUFA12/PFKM/EPHA2/GAPDH/ADCY3/PDE4D/NDUFS4/NDUFB4/NDUFB6/PGAM1/NDUFAB1/SDHD/NDUFA11/NDUFS7/PDHB/NDUFA5/PRPSAP1/ARL2/NDUFA6/NDUFB1/NDUFA8/BAD/NDUFS5/HINT1/NDUFB3/NDUFS6/NDUFS1/HSD17B12/PDE8A/NDUFB11/TPI1/ELOVL5/NDUFS8…	78
BP	GO:0009199	ribonucleoside triphosphate metabolic process	51/1397	249/18903	1.99596e-11	3.42157e-09	2.78735e-09	PRKAA2/ATP1A2/NUPR1/PID1/NDUFB7/NDUFA13/ALDOA/NDUFB10/NDUFA1/NDUFB9/NDUFC1/NDUFB2/APP/NDUFC2/ZBTB20/NDUFA12/PFKM/GAPDH/NDUFS4/NDUFB4/NDUFB6/PGAM1/NDUFAB1/SDHD/NDUFA11/NDUFS7/NDUFA5/ARL2/NDUFA6/NDUFB1/NDUFA8/BAD/NDUFS5/NDUFB3/NDUFS6/NDUFS1/NDUFB11/TPI1/NDUFS8/NME3/GPI/NDUFV2/FIS1/AK3/NDUFA3/NDUFB5/STOML2/NDUFS3/AK1/PRKAA1/RHOA	51
BP	GO:0009152	purine ribonucleotide biosynthetic process	47/1397	220/18903	2.65644e-11	4.41985e-09	3.60059e-09	GUCY1A2/PID1/ADCY6/PAPSS2/NDUFB7/NDUFA13/ALDOA/TECR/NDUFB10/NDUFA1/ADCY9/NDUFB9/ACSL3/NDUFC1/NDUFB2/NDUFC2/NDUFA12/ADCY3/NDUFS4/NDUFB4/NDUFB6/NDUFAB1/SDHD/NDUFA11/NDUFS7/PDHB/NDUFA5/NDUFA6/NDUFB1/NDUFA8/NDUFS5/NDUFB3/NDUFS6/NDUFS1/HSD17B12/NDUFB11/ELOVL5/NDUFS8/NME3/NDUFV2/AK3/NDUFA3/NDUFB5/STOML2/NDUFS3/AK1/ACAT1	47
BP	GO:0009141	nucleoside triphosphate metabolic process	53/1397	267/18903	2.81353e-11	4.54746e-09	3.70455e-09	PRKAA2/ATP1A2/NUPR1/PID1/NDUFB7/NDUFA13/ALDOA/NDUFB10/NDUFA1/NDUFB9/NDUFC1/NDUFB2/APP/NDUFC2/ZBTB20/NDUFA12/PFKM/GAPDH/NDUFS4/NDUFB4/NDUFB6/PGAM1/NDUFAB1/SDHD/NDUFA11/NDUFS7/NDUFA5/ARL2/NDUFA6/NDUFB1/NDUFA8/BAD/NDUFS5/NDUFB3/NDUFS6/NDUFS1/NDUFB11/TPI1/TBPL1/DUT/NDUFS8/NME3/GPI/NDUFV2/FIS1/AK3/NDUFA3/NDUFB5/STOML2/NDUFS3/AK1/PRKAA1/RHOA	53
BP	GO:0006164	purine nucleotide biosynthetic process	49/1397	242/18903	7.57634e-11	1.19054e-08	9.69861e-09	GUCY1A2/ADORA2B/PID1/ADCY6/PAPSS2/NDUFB7/NDUFA13/ALDOA/TECR/NDUFB10/NDUFA1/ADCY9/NDUFB9/ACSL3/NDUFC1/NDUFB2/NDUFC2/NDUFA12/ADCY3/NDUFS4/NDUFB4/NDUFB6/NDUFAB1/SDHD/NDUFA11/NDUFS7/PDHB/NDUFA5/PRPSAP1/NDUFA6/NDUFB1/NDUFA8/NDUFS5/NDUFB3/NDUFS6/NDUFS1/HSD17B12/NDUFB11/ELOVL5/NDUFS8/NME3/NDUFV2/AK3/NDUFA3/NDUFB5/STOML2/NDUFS3/AK1/ACAT1	49
BP	GO:0007015	actin filament organization	74/1397	454/18903	8.27304e-11	1.26488e-08	1.03042e-08	RGS4/SPTBN1/RND3/TTN/MYO1B/PHLDB2/SEMA5A/DAAM2/CALD1/PLS3/DLC1/TPM2/NEBL/CTTN/ESAM/EPS8/PAWR/FERMT2/TJP1/EMP2/KANK3/CDC42EP5/NCKAP1/CDC42EP4/FLNA/TPM1/MYO6/PDLIM1/SVIL/LIMA1/ARPC1A/ALDOA/ROCK2/SYNPO2/CDC42EP1/HIP1/FAT1/DSTN/LMOD1/SORBS3/PLEKHH2/ARHGAP6/MPRIP/PFN2/MYO1C/ITGB1BP1/RHOC/MARCKSL1/TPM4/CFL2/ADD3/ACTN1/ITGB5/SORBS2/WASL/ADD1/ACTG1/RHOBTB3/RUFY3/SLC9A1/PPARGC1B/CTNNA1/ZYX/BCL2/ABL1/ARF1/…	74
BP	GO:0150115	cell-substrate junction organization	29/1397	101/18903	1.11316e-10	1.65714e-08	1.34997e-08	LAMC1/FN1/PHLDB2/PTPRK/DLC1/CTTN/AJUBA/FERMT2/VCL/PTK2/PTEN/THBS1/ROCK2/DST/ARHGAP6/PTPRA/ITGB1BP1/TRIP6/ACTN1/IQSEC1/ACTG1/SLC9A1/MACF1/BCL2/TLN1/ARHGEF7/ABL1/BCAS3/RHOA	29
BP	GO:0007044	cell-substrate junction assembly	28/1397	95/18903	1.1805e-10	1.71234e-08	1.39494e-08	LAMC1/FN1/PHLDB2/PTPRK/DLC1/CTTN/AJUBA/FERMT2/VCL/PTK2/PTEN/THBS1/ROCK2/DST/ARHGAP6/PTPRA/ITGB1BP1/TRIP6/ACTN1/ACTG1/SLC9A1/MACF1/BCL2/TLN1/ARHGEF7/ABL1/BCAS3/RHOA	28
BP	GO:0032970	regulation of actin filament-based process	68/1397	406/18903	1.462e-10	2.06763e-08	1.68437e-08	ATP1A2/RGS4/SPTBN1/RND3/PHLDB2/SEMA5A/PDGFRB/DAAM2/CAV1/DLC1/CTTN/ESAM/CACNA1C/EPS8/FRMD6/FERMT2/TJP1/KANK3/CDC42EP5/NCKAP1/CDC42EP4/FLNA/TPM1/PAM/SVIL/LIMA1/ARPC1A/MYH9/LRP1/ROCK2/SYNPO2/CDC42EP1/JAM3/ACTA2/DSTN/LMOD1/SORBS3/PLEKHH2/ARHGAP6/PFN2/PDE4D/ITGB1BP1/RHOC/IQGAP1/CFL2/ADD3/WASL/ADD1/ACTG1/PHPT1/RHOBTB3/SLC9A1/CNN2/JUP/ABL1/ARF1/BCAS3/PIK3CA/SMAD4/CDC42/ARHGAP17/SRI/GSN/PLEKHG2/TMOD3/ATP…	68
BP	GO:0046390	ribose phosphate biosynthetic process	48/1397	241/18903	2.14095e-10	2.95399e-08	2.40644e-08	GUCY1A2/PID1/ADCY6/PAPSS2/NDUFB7/NDUFA13/ALDOA/TECR/NDUFB10/NDUFA1/ADCY9/NDUFB9/ACSL3/NDUFC1/NDUFB2/NDUFC2/NDUFA12/ADCY3/NDUFS4/NDUFB4/NDUFB6/NDUFAB1/SDHD/NDUFA11/NDUFS7/PDHB/NDUFA5/PRPSAP1/NDUFA6/NDUFB1/NDUFA8/NDUFS5/NDUFB3/NDUFS6/NDUFS1/HSD17B12/NDUFB11/ELOVL5/NDUFS8/NME3/NDUFV2/AK3/NDUFA3/NDUFB5/STOML2/NDUFS3/AK1/ACAT1	48
BP	GO:0009260	ribonucleotide biosynthetic process	47/1397	234/18903	2.45159e-10	3.30206e-08	2.68999e-08	GUCY1A2/PID1/ADCY6/PAPSS2/NDUFB7/NDUFA13/ALDOA/TECR/NDUFB10/NDUFA1/ADCY9/NDUFB9/ACSL3/NDUFC1/NDUFB2/NDUFC2/NDUFA12/ADCY3/NDUFS4/NDUFB4/NDUFB6/NDUFAB1/SDHD/NDUFA11/NDUFS7/PDHB/NDUFA5/NDUFA6/NDUFB1/NDUFA8/NDUFS5/NDUFB3/NDUFS6/NDUFS1/HSD17B12/NDUFB11/ELOVL5/NDUFS8/NME3/NDUFV2/AK3/NDUFA3/NDUFB5/STOML2/NDUFS3/AK1/ACAT1	47
BP	GO:0072522	purine-containing compound biosynthetic process	49/1397	251/18903	2.87991e-10	3.78876e-08	3.08647e-08	GUCY1A2/ADORA2B/PID1/ADCY6/PAPSS2/NDUFB7/NDUFA13/ALDOA/TECR/NDUFB10/NDUFA1/ADCY9/NDUFB9/ACSL3/NDUFC1/NDUFB2/NDUFC2/NDUFA12/ADCY3/NDUFS4/NDUFB4/NDUFB6/NDUFAB1/SDHD/NDUFA11/NDUFS7/PDHB/NDUFA5/PRPSAP1/NDUFA6/NDUFB1/NDUFA8/NDUFS5/NDUFB3/NDUFS6/NDUFS1/HSD17B12/NDUFB11/ELOVL5/NDUFS8/NME3/NDUFV2/AK3/NDUFA3/NDUFB5/STOML2/NDUFS3/AK1/ACAT1	49
BP	GO:0032835	glomerulus development	23/1397	69/18903	3.50844e-10	4.51074e-08	3.67463e-08	NID1/COL4A4/COL4A3/LAMB2/ENPEP/EDNRA/PDGFRB/FOXC1/PLCE1/NOTCH3/FOXC2/EDNRB/JAG1/HEYL/ANGPT1/GPR4/HES1/MAGI2/ACTA2/WWTR1/IQGAP1/BCL2/NOTCH1	23
BP	GO:0010810	regulation of cell-substrate adhesion	45/1397	222/18903	4.31722e-10	5.42722e-08	4.42124e-08	NID1/FN1/PHLDB2/EDIL3/DLC1/ECM2/FERMT2/EMP2/FBLN1/VCL/CCDC80/PTK2/ACTN4/JAG1/PTEN/FLNA/UTRN/RRAS/DAG1/DOCK1/EFEMP2/THBS1/ROCK2/ARHGAP6/PTPRA/RSU1/EMILIN1/ITGB1BP1/ARL2/ACTG1/ILK/HSD17B12/SLC9A1/MACF1/JUP/BCL2/TLN1/ARHGEF7/ABL1/BCAS3/BCL6/NF1/CDC42/NOTCH1/RHOA	45
BP	GO:0007229	integrin-mediated signaling pathway	30/1397	113/18903	4.43866e-10	5.45859e-08	4.44679e-08	ITGA10/LAMC1/NID1/FN1/LAMB2/ITGA1/LAMA2/PTN/ITGA7/FERMT2/EMP2/PTK2/TIMP1/FLNA/CD63/ITGB1/MYH9/DOCK1/DST/PTPRA/ITGB1BP1/ITGB5/ILK/ADAMTS1/CTNNA1/ZYX/TLN1/ABL1/ISG15/CDC42	30
BP	GO:0072006	nephron development	35/1397	152/18903	1.10087e-09	1.32503e-07	1.07942e-07	NID1/WNT6/COL4A4/COL4A3/LAMB2/ENPEP/EDNRA/FOXD1/PDGFRB/FOXC1/PLCE1/SIX1/NOTCH3/FOXC2/EDNRB/JAG1/PBX1/AGT/YAP1/HEYL/FGF1/ANGPT1/GPR4/PTCH1/HES1/MAGI2/ACTA2/WWTR1/IQGAP1/ILK/BCL2/PKD1/SMAD4/ACAT1/NOTCH1	35
BP	GO:0048041	focal adhesion assembly	25/1397	85/18903	1.21683e-09	1.43409e-07	1.16827e-07	PHLDB2/PTPRK/DLC1/CTTN/AJUBA/FERMT2/VCL/PTK2/PTEN/THBS1/ROCK2/ARHGAP6/PTPRA/ITGB1BP1/TRIP6/ACTN1/ACTG1/SLC9A1/MACF1/BCL2/TLN1/ARHGEF7/ABL1/BCAS3/RHOA	25
BP	GO:0001667	ameboidal-type cell migration	75/1397	492/18903	1.42265e-09	1.64243e-07	1.33799e-07	FN1/TNS1/PTPRG/FSTL1/AMOTL2/EDNRA/SEMA5A/MIR145/SPARC/DAAM2/SASH1/SMOC2/PTN/CD248/KITLG/DCN/RHOJ/NR2F2/EMP2/SYDE1/FOXC2/PTK2/EDNRB/TBXA2R/TIMP1/KANK2/PTEN/RADIL/ANXA6/RRAS/AGT/ETS1/PDLIM1/FGF1/ANGPT1/ITGB1/MYH9/DOCK1/DAB2IP/VSTM4/THBS1/DDR2/ROCK2/MCC/ACTA2/ADAMTS9/PFN2/SGPL1/EPHA2/SEMA6D/AKAP12/ITGB1BP1/IQGAP1/IQSEC1/ILK/GIPC1/FOXP1/MACF1/TNFSF12/STARD13/AKT3/JUP/ARHGEF7/GPI/ABL1/BCAS3/PIK3CA/NF1…	75
BP	GO:0030048	actin filament-based movement	32/1397	134/18903	2.1544e-09	2.43749e-07	1.98568e-07	ATP1A2/MYO1B/KCNE4/EPDR1/CAV1/PARVA/CACNA1C/KCNJ8/ABCC9/FRMD6/SYNE2/EMP2/GJC1/ACTN4/FLNA/TPM1/CACNA2D1/MYO6/MYH9/MYL6/MYH10/ACTA2/MYO1C/PDE4D/WASL/SLC9A1/JUP/PIK3CA/MYL6B/SRI/GSN/ATP2A2	32
BP	GO:0042692	muscle cell differentiation	65/1397	409/18903	3.35942e-09	3.72632e-07	3.03561e-07	RGS4/LAMC1/NID1/FHL2/TTN/LAMB2/EDNRA/MIR145/PDGFRB/HEY2/LAMA2/GPER1/CAV2/SMARCD3/DMD/NEBL/IGF2/CD9/CSRP2/TBX3/NFATC4/SIX1/TMEM204/TBX2/MYL9/EHD2/IGFBP5/ACTN4/EDNRB/TPM1/AGT/ITGB1/MYH9/DOCK1/EFEMP2/RBPMS2/HOPX/SGCB/MSX1/TBX18/HES1/SYNE1/PRKAR1A/RORA/LMOD1/LMNA/ZEB1/CFL2/ACTN1/SORBS2/CAMK1/ACTG1/BMPR1A/SLC9A1/FOXP1/CD81/BCL2/ZNHIT1/SMAD4/RBPJ/TMOD3/ATP2A2/CAPN2/NOTCH1/PDLIM5	65
BP	GO:0060537	muscle tissue development	66/1397	422/18903	4.92461e-09	5.35741e-07	4.36436e-07	RGS4/FHL2/TTN/MYLK/EDNRA/MIR145/PDGFRB/FOXC1/HEY2/CAV2/CAV1/DMD/NEBL/IGF2/ITGA7/CSRP2/TBX3/SIX1/NR2F2/NUPR1/GJC1/HLF/TBX2/FOXC2/IGFBP5/VAMP5/LEF1/PTEN/TPM1/AGT/YAP1/HEYL/SVIL/ITGB1/EFEMP2/MYL6/HOPX/SGCB/PTCH1/MSX1/TBX18/PRKAR1A/ADAMTS9/LMNA/CFL2/SORBS2/BMPR1A/DDX17/SLC9A1/SAV1/FOXP1/BCL2/ABL1/NDUFV2/MYL6B/SMAD4/NF1/SMAD5/CDC42/RBPJ/BCL9L/TGFBR2/NOTCH1/PRKAA1/RHOA/PDLIM5	66
BP	GO:0048762	mesenchymal cell differentiation	46/1397	252/18903	9.31926e-09	9.947e-07	8.10323e-07	FRZB/FN1/PHLDB2/EDNRA/SEMA5A/RANBP3L/FOXF2/FOXC1/HEY2/KITLG/TBX3/FERMT2/SIX1/EMP2/TGFB1I1/FOXC2/PTK2/LEF1/EDNRB/JAG1/PTEN/RADIL/FLNA/VASN/ANXA6/AXIN2/HEYL/DAG1/DAB2IP/MSX1/ROCK2/HES1/WWTR1/PHLDB1/SEMA6D/BMPR1A/DDX17/BCL2/SMAD4/CDC42/RBPJ/FAM172A/BCL9L/TGFBR2/PDCD6/NOTCH1	46
BP	GO:0003015	heart process	47/1397	261/18903	1.00756e-08	1.05551e-06	8.59863e-07	ATP1A2/RGS4/EPAS1/TTN/KCNE4/PDE5A/EDNRA/HEY2/CAV1/DMD/CACNA1C/KCNJ8/ABCC9/ATP1B2/GJC1/TBX2/HRC/HCN2/EDNRB/FLNA/TPM1/CACNA2D1/FXYD1/AGT/YAP1/CALM2/HOPX/TBX18/TRPC1/FYN/WWTR1/MAP2K6/PDE4D/TMEM38B/THRA/SLC9A1/RPS6KA2/JUP/EXT2/SOD1/PIK3CA/GSTO1/SMAD5/CDC42/SRI/GSN/ATP2A2	47
BP	GO:0035909	aorta morphogenesis	15/1397	36/18903	1.25589e-08	1.29174e-06	1.0523e-06	MYLK/MIR145/PDGFRB/HEY2/SIX1/TBX2/FKBP10/JAG1/EFEMP2/LRP1/HES1/ADAMTS9/BMPR1A/RBPJ/NOTCH1	15
BP	GO:0072001	renal system development	53/1397	318/18903	1.86297e-08	1.88193e-06	1.5331e-06	NID1/WNT6/COL4A4/COL4A3/LAMB2/ENPEP/EDNRA/FOXD1/PDGFRB/FOXC1/PLCE1/EMX2/KCNJ8/COL4A1/SIX1/NOTCH3/FOXC2/EDNRB/JAG1/KANK2/PBX1/AGT/YAP1/HEYL/FGF1/ANGPT1/GPR4/PTCH1/TBX18/HES1/MAGI2/ACTA2/NFIA/WWTR1/ARL3/CC2D2A/ID3/DYNC2H1/SGPL1/ZBTB16/IQGAP1/ILK/CAT/ADAMTS1/BCL2/PKD1/HSPB11/SMAD4/NF1/SMAD5/ACAT1/NOTCH1/RHOA	53
BP	GO:0009165	nucleotide biosynthetic process	51/1397	304/18903	2.76624e-08	2.74537e-06	2.23649e-06	GUCY1A2/ADORA2B/PID1/ADCY6/PAPSS2/NDUFB7/NDUFA13/ALDOA/TECR/NDUFB10/NDUFA1/ADCY9/NDUFB9/ACSL3/NDUFC1/NDUFB2/NDUFC2/NDUFA12/ADCY3/NDUFS4/NDUFB4/NDUFB6/NDUFAB1/SDHD/NDUFA11/NDUFS7/PDHB/NDUFA5/PRPSAP1/NDUFA6/NDUFB1/NDUFA8/NDUFS5/NDUFB3/NDUFS6/NDUFS1/HSD17B12/NDUFB11/TBPL1/ELOVL5/DUT/NDUFS8/NME3/NDUFV2/AK3/NDUFA3/NDUFB5/STOML2/NDUFS3/AK1/ACAT1	51
BP	GO:0060485	mesenchyme development	52/1397	313/18903	2.82546e-08	2.7558e-06	2.24499e-06	FRZB/FN1/PHLDB2/EDNRA/SEMA5A/RANBP3L/FOXD1/PDGFRB/FOXF2/FOXC1/HEY2/KITLG/TBX3/FERMT2/SIX1/EMP2/TGFB1I1/TBX2/FOXC2/PTK2/LEF1/EDNRB/JAG1/PTEN/RADIL/FLNA/VASN/ANXA6/YAP1/AXIN2/HEYL/DAG1/DAB2IP/MSX1/ROCK2/HES1/ACTA2/WWTR1/PHLDB1/SEMA6D/BMPR1A/DDX17/BCL2/CRELD1/SMAD4/CDC42/RBPJ/FAM172A/BCL9L/TGFBR2/PDCD6/NOTCH1	52
BP	GO:0003018	vascular process in circulatory system	47/1397	270/18903	3.01315e-08	2.88905e-06	2.35354e-06	ECE1/ATP1A2/SLC6A1/EDNRA/ITGA1/SLC12A2/FOXC1/GPER1/CAV1/PRKG1/ARHGAP42/SLC6A13/SLCO1C1/KCNJ8/ABCC9/FERMT2/TJP1/SLC2A4/ATP1B2/ADORA2B/SLC19A1/PDE2A/FOXC2/SLC16A2/EDNRB/TBXA2R/ADRA2C/SOD3/CD38/ADCY6/AGT/ANGPT1/VSTM4/GPR4/PDE3A/LRP1/ROCK2/SLCO3A1/ACTA2/AKAP12/ITGB1BP1/SLC38A2/GCLM/EXT2/ABL1/SOD1/RHOA	47
BP	GO:1901293	nucleoside phosphate biosynthetic process	51/1397	306/18903	3.44617e-08	3.24917e-06	2.6469e-06	GUCY1A2/ADORA2B/PID1/ADCY6/PAPSS2/NDUFB7/NDUFA13/ALDOA/TECR/NDUFB10/NDUFA1/ADCY9/NDUFB9/ACSL3/NDUFC1/NDUFB2/NDUFC2/NDUFA12/ADCY3/NDUFS4/NDUFB4/NDUFB6/NDUFAB1/SDHD/NDUFA11/NDUFS7/PDHB/NDUFA5/PRPSAP1/NDUFA6/NDUFB1/NDUFA8/NDUFS5/NDUFB3/NDUFS6/NDUFS1/HSD17B12/NDUFB11/TBPL1/ELOVL5/DUT/NDUFS8/NME3/NDUFV2/AK3/NDUFA3/NDUFB5/STOML2/NDUFS3/AK1/ACAT1	51
BP	GO:0001655	urogenital system development	57/1397	360/18903	3.54659e-08	3.27605e-06	2.6688e-06	NID1/WNT6/COL4A4/COL4A3/LAMB2/ENPEP/EDNRA/FOXD1/PDGFRB/FOXC1/PLCE1/EMX2/KCNJ8/COL4A1/SIX1/NOTCH3/FOXC2/CYP7B1/EDNRB/JAG1/KANK2/PTEN/PBX1/AGT/YAP1/HEYL/FGF1/ANGPT1/GPR4/PTCH1/TBX18/HES1/MAGI2/ACTA2/NFIA/WWTR1/ARL3/CC2D2A/ID3/CRIP1/DYNC2H1/SGPL1/ZBTB16/IQGAP1/CDKN1B/ILK/CAT/ADAMTS1/BCL2/PKD1/HSPB11/SMAD4/NF1/SMAD5/ACAT1/NOTCH1/RHOA	57
BP	GO:0048844	artery morphogenesis	22/1397	79/18903	3.5905e-08	3.27605e-06	2.6688e-06	PRRX1/MYLK/EDNRA/MIR145/PDGFRB/FOXC1/HEY2/SIX1/TBX2/NOTCH3/FOXC2/FKBP10/JAG1/EFEMP2/LRP1/HES1/ADAMTS9/BMPR1A/AKT3/NF1/RBPJ/NOTCH1	22
BP	GO:0030198	extracellular matrix organization	52/1397	318/18903	4.82503e-08	4.33257e-06	3.52949e-06	LAMC1/NID1/COL5A2/COL4A4/COL4A3/LAMB2/PHLDB2/FOXF2/FOXC1/COL9A1/LAMA2/SMOC2/COL1A2/CAV2/CAV1/COL14A1/ECM2/LUM/NTN4/COL4A1/COL4A2/COL5A3/FBLN1/FOXC2/FKBP10/CCDC80/AGT/OLFML2A/DAG1/ITGB1/EFEMP2/COL27A1/LRP1/DDR2/ADAMTS9/APP/AEBP1/PHLDB1/PRDX4/EMILIN1/CRISPLD2/TMEM38B/ADAMTS10/BMP1/HSD17B12/ADAMTS1/ANXA2/LTBP3/ABL1/NF1/PBXIP1/NOTCH1	52
BP	GO:0055001	muscle cell development	37/1397	191/18903	5.28834e-08	4.66499e-06	3.80029e-06	RGS4/FHL2/TTN/EDNRA/PDGFRB/HEY2/CAV2/DMD/NEBL/CSRP2/TBX3/NFATC4/SIX1/MYL9/ACTN4/TPM1/AGT/ITGB1/EFEMP2/SGCB/TBX18/HES1/PRKAR1A/LMOD1/LMNA/CFL2/ACTN1/SORBS2/ACTG1/BMPR1A/FOXP1/BCL2/SMAD4/TMOD3/ATP2A2/NOTCH1/PDLIM5	37
BP	GO:0043062	extracellular structure organization	52/1397	319/18903	5.36017e-08	4.66499e-06	3.80029e-06	LAMC1/NID1/COL5A2/COL4A4/COL4A3/LAMB2/PHLDB2/FOXF2/FOXC1/COL9A1/LAMA2/SMOC2/COL1A2/CAV2/CAV1/COL14A1/ECM2/LUM/NTN4/COL4A1/COL4A2/COL5A3/FBLN1/FOXC2/FKBP10/CCDC80/AGT/OLFML2A/DAG1/ITGB1/EFEMP2/COL27A1/LRP1/DDR2/ADAMTS9/APP/AEBP1/PHLDB1/PRDX4/EMILIN1/CRISPLD2/TMEM38B/ADAMTS10/BMP1/HSD17B12/ADAMTS1/ANXA2/LTBP3/ABL1/NF1/PBXIP1/NOTCH1	52
BP	GO:0032956	regulation of actin cytoskeleton organization	57/1397	365/18903	5.78986e-08	4.96261e-06	4.04274e-06	RGS4/SPTBN1/RND3/PHLDB2/SEMA5A/PDGFRB/DAAM2/DLC1/CTTN/ESAM/EPS8/FERMT2/TJP1/KANK3/CDC42EP5/NCKAP1/CDC42EP4/FLNA/TPM1/PAM/SVIL/LIMA1/ARPC1A/LRP1/ROCK2/SYNPO2/CDC42EP1/JAM3/DSTN/LMOD1/SORBS3/PLEKHH2/ARHGAP6/PFN2/ITGB1BP1/RHOC/IQGAP1/CFL2/ADD3/WASL/ADD1/ACTG1/PHPT1/RHOBTB3/SLC9A1/ABL1/ARF1/BCAS3/PIK3CA/SMAD4/CDC42/ARHGAP17/GSN/PLEKHG2/TMOD3/ABI2/RHOA	57
BP	GO:0060047	heart contraction	44/1397	250/18903	5.93575e-08	5.01172e-06	4.08275e-06	ATP1A2/RGS4/EPAS1/TTN/KCNE4/PDE5A/EDNRA/HEY2/CAV1/DMD/CACNA1C/KCNJ8/ABCC9/ATP1B2/GJC1/TBX2/HRC/HCN2/EDNRB/FLNA/TPM1/CACNA2D1/FXYD1/AGT/CALM2/HOPX/TBX18/TRPC1/MAP2K6/PDE4D/TMEM38B/THRA/SLC9A1/RPS6KA2/JUP/EXT2/SOD1/PIK3CA/GSTO1/SMAD5/CDC42/SRI/GSN/ATP2A2	44
BP	GO:0045229	external encapsulating structure organization	52/1397	321/18903	6.60305e-08	5.49316e-06	4.47495e-06	LAMC1/NID1/COL5A2/COL4A4/COL4A3/LAMB2/PHLDB2/FOXF2/FOXC1/COL9A1/LAMA2/SMOC2/COL1A2/CAV2/CAV1/COL14A1/ECM2/LUM/NTN4/COL4A1/COL4A2/COL5A3/FBLN1/FOXC2/FKBP10/CCDC80/AGT/OLFML2A/DAG1/ITGB1/EFEMP2/COL27A1/LRP1/DDR2/ADAMTS9/APP/AEBP1/PHLDB1/PRDX4/EMILIN1/CRISPLD2/TMEM38B/ADAMTS10/BMP1/HSD17B12/ADAMTS1/ANXA2/LTBP3/ABL1/NF1/PBXIP1/NOTCH1	52
BP	GO:0001952	regulation of cell-matrix adhesion	28/1397	125/18903	9.34266e-08	7.65962e-06	6.23984e-06	PHLDB2/DLC1/FERMT2/EMP2/VCL/PTK2/JAG1/PTEN/UTRN/RRAS/DAG1/EFEMP2/THBS1/ROCK2/ARHGAP6/PTPRA/ITGB1BP1/ACTG1/SLC9A1/MACF1/JUP/BCL2/TLN1/ABL1/BCAS3/BCL6/NF1/RHOA	28
BP	GO:0031032	actomyosin structure organization	38/1397	204/18903	1.03029e-07	8.32617e-06	6.78284e-06	CNN3/CDC42BPA/TTN/PHLDB2/PDGFRB/DLC1/FRMD3/NEBL/CSRP2/FRMD6/FERMT2/TJP1/MYL9/EPB41L1/TPM1/PDLIM1/ITGB1/MYH9/MYH10/ROCK2/PRKAR1A/LMOD1/SORBS3/ARHGAP6/PFN2/ITGB1BP1/RHOC/CFL2/ITGB5/ACTG1/SLC9A1/CNN2/ZYX/ABL1/SMAD4/CDC42/TMOD3/RHOA	38
BP	GO:0016055	Wnt signaling pathway	66/1397	456/18903	1.05038e-07	8.36898e-06	6.81771e-06	PRKAA2/FRZB/IGFBP2/WNT6/RBMS3/AMOTL2/EDNRA/CPE/SEMA5A/FOXD1/MIR145/DAAM2/EGFR/CAV1/DKK3/GPC5/NFATC4/FERMT2/TGFB1I1/IGFBP6/LEF1/EDNRB/WLS/PTEN/TLE1/YAP1/AXIN2/IGFBP4/DAB2IP/GRK5/TBX18/LRP1/NDRG2/MAGI2/MCC/CDK14/APCDD1/WWTR1/NKD1/APP/JADE1/CSNK1E/PLEKHA4/TMEM9/ILK/ATP6AP2/LATS2/RYK/TTC21B/MACF1/JUP/RBX1/PIN1/PKD1/ABL1/HDAC1/LZTS2/CDC42/PBXIP1/RBPJ/PPP2R1A/BCL9L/STK3/NOTCH1/PRKAA1/RHOA	66
BP	GO:0090257	regulation of muscle system process	44/1397	256/18903	1.20483e-07	9.4663e-06	7.71163e-06	ATP1A2/RGS4/PDE5A/TRPC3/MIR145/GPER1/CAV1/DMD/PRKG1/PLCE1/CTTN/ARHGAP42/CACNA1C/ADORA2B/SSTR2/MYL9/HRC/IGFBP5/TBXA2R/ADRA2C/TPM1/SGCA/ANXA6/AGT/C12orf57/DAG1/CALM2/ROCK2/FBXO32/LMNA/PDE4D/TMEM38B/PPP1R12B/SLC9A1/CAMK2G/FOXP1/JUP/SOD1/GSTO1/SMAD4/SRI/ATP2A2/NOTCH1/RHOA	44
BP	GO:0198738	cell-cell signaling by wnt	66/1397	458/18903	1.23998e-07	9.609e-06	7.82788e-06	PRKAA2/FRZB/IGFBP2/WNT6/RBMS3/AMOTL2/EDNRA/CPE/SEMA5A/FOXD1/MIR145/DAAM2/EGFR/CAV1/DKK3/GPC5/NFATC4/FERMT2/TGFB1I1/IGFBP6/LEF1/EDNRB/WLS/PTEN/TLE1/YAP1/AXIN2/IGFBP4/DAB2IP/GRK5/TBX18/LRP1/NDRG2/MAGI2/MCC/CDK14/APCDD1/WWTR1/NKD1/APP/JADE1/CSNK1E/PLEKHA4/TMEM9/ILK/ATP6AP2/LATS2/RYK/TTC21B/MACF1/JUP/RBX1/PIN1/PKD1/ABL1/HDAC1/LZTS2/CDC42/PBXIP1/RBPJ/PPP2R1A/BCL9L/STK3/NOTCH1/PRKAA1/RHOA	66
BP	GO:0007599	hemostasis	41/1397	231/18903	1.31153e-07	1.00261e-05	8.16765e-06	F3/PEAR1/TFPI/FN1/DGKB/CAV1/PRKG1/CD9/C1QTNF1/MYL9/FBLN1/VCL/TBXA2R/TSPAN8/FLNA/ADRA2C/F10/SERPING1/PAPSS2/SLC7A11/CD59/MYH9/THBS1/ANO6/DGKH/MYL12A/PRDX2/EMILIN1/PROS1/ACTG1/ILK/ACTB/ANXA2/AXL/C1GALT1C1/TLN1/GPI/VKORC1/PIK3CA/AK3/LMAN1	41
BP	GO:1902903	regulation of supramolecular fiber organization	58/1397	384/18903	1.44365e-07	1.0889e-05	8.8706e-06	RGS4/SPTBN1/MAP2/PHLDB2/SEMA5A/MAP1B/DAAM2/DLC1/CTTN/ESAM/EPS8/FERMT2/TJP1/KANK3/CDC42EP5/NCKAP1/CDC42EP4/FLNA/TPM1/SVIL/LIMA1/ARPC1A/EFEMP2/ROCK2/SYNPO2/CDC42EP1/DSTN/LMOD1/SORBS3/APP/PLEKHH2/ARHGAP6/PFN2/AEBP1/PARK7/EMILIN1/ITGB1BP1/RHOC/CDKN1B/CFL2/ADD3/WASL/ARL2/ADD1/ACTG1/MAP1A/SLC9A1/ARHGEF7/ABL1/ARF1/PIK3CA/SMAD4/CDC42/GSN/PLEKHG2/TMOD3/ABI2/RHOA	58
BP	GO:0007596	blood coagulation	40/1397	225/18903	1.77797e-07	1.32341e-05	1.07811e-05	F3/PEAR1/TFPI/FN1/DGKB/CAV1/PRKG1/CD9/C1QTNF1/MYL9/FBLN1/VCL/TBXA2R/TSPAN8/FLNA/ADRA2C/F10/SERPING1/PAPSS2/SLC7A11/CD59/MYH9/THBS1/ANO6/DGKH/MYL12A/PRDX2/EMILIN1/PROS1/ACTG1/ILK/ACTB/ANXA2/AXL/C1GALT1C1/TLN1/VKORC1/PIK3CA/AK3/LMAN1	40
BP	GO:0110053	regulation of actin filament organization	46/1397	278/18903	1.99031e-07	1.46223e-05	1.19119e-05	RGS4/SPTBN1/PHLDB2/SEMA5A/DAAM2/DLC1/CTTN/ESAM/EPS8/FERMT2/TJP1/KANK3/CDC42EP5/NCKAP1/CDC42EP4/FLNA/TPM1/SVIL/LIMA1/ARPC1A/ROCK2/SYNPO2/CDC42EP1/DSTN/LMOD1/SORBS3/PLEKHH2/ARHGAP6/PFN2/ITGB1BP1/RHOC/CFL2/ADD3/WASL/ADD1/ACTG1/SLC9A1/ABL1/ARF1/PIK3CA/CDC42/GSN/PLEKHG2/TMOD3/ABI2/RHOA	46
BP	GO:0061041	regulation of wound healing	29/1397	137/18903	2.02913e-07	1.47164e-05	1.19886e-05	F3/TFPI/PHLDB2/MYLK/SLC12A2/SMOC2/CAV1/PRKG1/CD9/FERMT2/C1QTNF1/FOXC2/PTK2/TBXA2R/TSPAN8/PTEN/SERPING1/ITGB1/THBS1/ANO6/DDR2/CADM4/ACTA2/PRDX2/EMILIN1/PROS1/ACTG1/ANXA2/VKORC1	29
BP	GO:0001822	kidney development	49/1397	309/18903	3.04909e-07	2.18338e-05	1.77867e-05	NID1/WNT6/COL4A4/COL4A3/LAMB2/ENPEP/EDNRA/FOXD1/PDGFRB/FOXC1/PLCE1/KCNJ8/SIX1/NOTCH3/FOXC2/EDNRB/JAG1/KANK2/PBX1/AGT/YAP1/HEYL/FGF1/ANGPT1/GPR4/PTCH1/HES1/MAGI2/ACTA2/WWTR1/ARL3/CC2D2A/ID3/DYNC2H1/SGPL1/ZBTB16/IQGAP1/ILK/CAT/ADAMTS1/BCL2/PKD1/HSPB11/SMAD4/NF1/SMAD5/ACAT1/NOTCH1/RHOA	49
BP	GO:0050817	coagulation	40/1397	230/18903	3.24545e-07	2.29494e-05	1.86955e-05	F3/PEAR1/TFPI/FN1/DGKB/CAV1/PRKG1/CD9/C1QTNF1/MYL9/FBLN1/VCL/TBXA2R/TSPAN8/FLNA/ADRA2C/F10/SERPING1/PAPSS2/SLC7A11/CD59/MYH9/THBS1/ANO6/DGKH/MYL12A/PRDX2/EMILIN1/PROS1/ACTG1/ILK/ACTB/ANXA2/AXL/C1GALT1C1/TLN1/VKORC1/PIK3CA/AK3/LMAN1	40
BP	GO:1903034	regulation of response to wounding	33/1397	172/18903	3.45629e-07	2.41386e-05	1.96642e-05	F3/TFPI/PHLDB2/MYLK/SLC12A2/SMOC2/CAV1/PTN/PRKG1/CD9/FERMT2/C1QTNF1/FOXC2/PTK2/TBXA2R/TSPAN8/PTEN/FLNA/SERPING1/PTPRS/ITGB1/THBS1/ANO6/DDR2/CADM4/ACTA2/PRDX2/EMILIN1/PROS1/ACTG1/ANXA2/VKORC1/STK24	33
BP	GO:0150116	regulation of cell-substrate junction organization	19/1397	69/18903	3.68593e-07	2.54284e-05	2.0715e-05	PHLDB2/DLC1/FERMT2/VCL/PTK2/PTEN/THBS1/ROCK2/ARHGAP6/PTPRA/ITGB1BP1/IQSEC1/ACTG1/SLC9A1/MACF1/TLN1/ABL1/BCAS3/RHOA	19
BP	GO:0070252	actin-mediated cell contraction	24/1397	104/18903	4.2473e-07	2.89481e-05	2.35823e-05	ATP1A2/KCNE4/EPDR1/CAV1/PARVA/CACNA1C/KCNJ8/ABCC9/FRMD6/EMP2/GJC1/FLNA/TPM1/CACNA2D1/MYL6/ACTA2/PDE4D/SLC9A1/JUP/PIK3CA/MYL6B/SRI/GSN/ATP2A2	24
BP	GO:0001666	response to hypoxia	47/1397	296/18903	5.08911e-07	3.42728e-05	2.792e-05	PLOD1/EPAS1/EDNRA/MIR145/CAV1/AJUBA/SLC2A4/ANGPTL4/PGF/ACTN4/WTIP/PTEN/SOD3/PAM/VASN/PLOD2/CD38/PDLIM1/THBS1/DDR2/ROCK2/RORA/MALAT1/LMNA/CHCHD2/FAM162A/SDHD/CDKN1B/HP1BP3/PSEN2/BAD/CAT/SLC9A1/TMBIM6/HMOX2/BCL2/PIN1/SMAD4/NF1/ITPR1/RBPJ/STUB1/TGFBR2/CAPN2/NOTCH1/PRKAA1/RHOA	47
BP	GO:0007163	establishment or maintenance of cell polarity	40/1397	234/18903	5.16701e-07	3.42907e-05	2.79346e-05	RND3/AMOTL2/MAP1B/PARD3/PARVA/LIN7A/RHOJ/CYTH3/PLEKHG3/PTK2/PARD6G/PDLIM1/ITGB1/MYH9/ROCK2/CLIC4/HES1/JAM3/FAT1/DST/LMNA/FEZ1/RHOC/MYO9A/ILK/ACTB/RHOBTB3/RUFY3/SLC9A1/MAP4/CTNNA1/ATN1/WEE1/PKD1/ABL1/BCAS3/CDC42/GSN/DYNLT1/RHOA	40
BP	GO:0051893	regulation of focal adhesion assembly	18/1397	64/18903	5.27363e-07	3.42907e-05	2.79346e-05	PHLDB2/DLC1/FERMT2/VCL/PTK2/PTEN/THBS1/ROCK2/ARHGAP6/PTPRA/ITGB1BP1/ACTG1/SLC9A1/MACF1/TLN1/ABL1/BCAS3/RHOA	18
BP	GO:0090109	regulation of cell-substrate junction assembly	18/1397	64/18903	5.27363e-07	3.42907e-05	2.79346e-05	PHLDB2/DLC1/FERMT2/VCL/PTK2/PTEN/THBS1/ROCK2/ARHGAP6/PTPRA/ITGB1BP1/ACTG1/SLC9A1/MACF1/TLN1/ABL1/BCAS3/RHOA	18
BP	GO:0006939	smooth muscle contraction	25/1397	113/18903	5.76442e-07	3.7056e-05	3.01874e-05	ATP1A2/MYLK/APBB2/EDNRA/MIR145/GPER1/CAV1/PRKG1/PLCE1/CTTN/ARHGAP42/TBX3/ADORA2B/TBX2/SSTR2/EDNRB/TBXA2R/ADRA2C/SMTN/CD38/AGT/ROCK2/ACTA2/SOD1/RHOA	25
BP	GO:0001503	ossification	61/1397	429/18903	5.90319e-07	3.75217e-05	3.05667e-05	ECM1/FHL2/COL5A2/PTH1R/RANBP3L/FOXC1/EGFR/COL1A2/PTN/IFITM1/IGF2/MGP/FERMT2/CDH11/COL6A1/GABBR1/FOXC2/CLEC11A/IGFBP5/PTK2/LEF1/JAG1/PBX1/YAP1/AXIN2/CRIM1/PTCH1/ANO6/DDR2/PDLIM7/WWTR1/MAP2K6/ID3/BCAP29/EPHA2/ZBTB16/ATRAID/TPM4/TMEM38B/THRA/SBDS/BMPR1A/MRC2/ILK/BMP1/CAT/PPARGC1B/BCL2/LTBP3/EXT2/NAB1/SMAD4/ISG15/HSD17B4/CLTC/NF1/SMAD5/UFL1/RBPJ/NOTCH1/RHOA	61
BP	GO:0090130	tissue migration	55/1397	374/18903	7.22411e-07	4.54075e-05	3.69908e-05	PTPRG/FSTL1/SEMA5A/SPARC/DAAM2/SASH1/SMOC2/PTN/KITLG/DCN/RHOJ/NR2F2/EMP2/FOXC2/PTK2/TBXA2R/KANK2/PTEN/RRAS/AGT/ETS1/FGF1/ANGPT1/ITGB1/MYH9/DOCK1/DAB2IP/VSTM4/THBS1/ROCK2/MCC/ACTA2/ADAMTS9/PFN2/EPHA2/ITGB1BP1/IQSEC1/GIPC1/FOXP1/MACF1/TNFSF12/STARD13/AKT3/JUP/GPI/ABL1/BCAS3/PIK3CA/NF1/AAMP/PDCD10/TGFBR2/PDCD6/NOTCH1/RHOA	55
BP	GO:0010631	epithelial cell migration	54/1397	366/18903	8.19947e-07	5.09719e-05	4.15238e-05	PTPRG/FSTL1/SEMA5A/SPARC/DAAM2/SASH1/SMOC2/PTN/KITLG/DCN/RHOJ/NR2F2/EMP2/FOXC2/PTK2/TBXA2R/KANK2/PTEN/RRAS/AGT/ETS1/FGF1/ANGPT1/ITGB1/MYH9/DOCK1/DAB2IP/VSTM4/THBS1/ROCK2/MCC/ADAMTS9/PFN2/EPHA2/ITGB1BP1/IQSEC1/GIPC1/FOXP1/MACF1/TNFSF12/STARD13/AKT3/JUP/GPI/ABL1/BCAS3/PIK3CA/NF1/AAMP/PDCD10/TGFBR2/PDCD6/NOTCH1/RHOA	54
BP	GO:0033002	muscle cell proliferation	41/1397	247/18903	8.29518e-07	5.10063e-05	4.15518e-05	MIR145/PDGFRB/FOXC1/HEY2/GPER1/CAV2/PRKG1/SIX1/TBX2/NOTCH3/FOXC2/IGFBP5/PTEN/TPM1/AGT/YAP1/ANGPT1/EFEMP2/THBS1/RBPMS2/DDR2/NDRG2/PRKAR1A/CDKN1B/BMPR1A/ADAMTS1/LDLRAP1/SAV1/FOXP1/MNAT1/ABL1/XRCC5/HDAC1/PIK3CA/NF1/PRKDC/RBPJ/XRCC6/TGFBR2/NOTCH1/RHOA	41
BP	GO:0006979	response to oxidative stress	61/1397	434/18903	8.78143e-07	5.34156e-05	4.35145e-05	PRKAA2/EPAS1/EDNRA/PDGFRB/PTPRK/EGFR/RBPMS/PAWR/PRODH/GPX3/TPM1/SOD3/NQO1/CD38/TXNIP/PDLIM1/SLC7A11/PLA2R1/DDR2/MAP1LC3A/MSRB3/GSTP1/FYN/APP/CHCHD2/PRDX2/NDUFA12/PARK7/PRDX4/NDUFB4/SESN3/ERCC6L2/NDUFA6/BAD/TXN/NFE2L1/CAT/PDE8A/PON2/FOXP1/PPARGC1B/HMOX2/NDUFS8/AXL/BCL2/PRDX5/STX2/GCLM/SLC25A24/ABL1/PPP2CB/SOD1/PSIP1/PSMB5/STK24/PDCD10/ATP2A2/CAPN2/ROMO1/MGMT/PRKAA1	61
BP	GO:0003158	endothelium development	28/1397	139/18903	9.49206e-07	5.7124e-05	4.65355e-05	GJA4/FSTL1/EDNRA/HEY2/S1PR3/APOLD1/TJP1/NR2F2/VCL/PDE2A/FOXC2/EDNRB/JAG1/FGF1/ROCK2/CLIC4/ZEB1/PDE4D/ADD1/FOXP1/STARD13/SLC40A1/EDF1/SMAD4/RBPJ/PDCD10/NOTCH1/RHOA	28
BP	GO:0072009	nephron epithelium development	25/1397	116/18903	9.69557e-07	5.77346e-05	4.70329e-05	WNT6/LAMB2/EDNRA/FOXD1/FOXC1/SIX1/FOXC2/EDNRB/JAG1/PBX1/AGT/YAP1/HEYL/FGF1/PTCH1/HES1/MAGI2/WWTR1/IQGAP1/ILK/BCL2/PKD1/SMAD4/ACAT1/NOTCH1	25
BP	GO:0090132	epithelium migration	54/1397	369/18903	1.06112e-06	6.2529e-05	5.09386e-05	PTPRG/FSTL1/SEMA5A/SPARC/DAAM2/SASH1/SMOC2/PTN/KITLG/DCN/RHOJ/NR2F2/EMP2/FOXC2/PTK2/TBXA2R/KANK2/PTEN/RRAS/AGT/ETS1/FGF1/ANGPT1/ITGB1/MYH9/DOCK1/DAB2IP/VSTM4/THBS1/ROCK2/MCC/ADAMTS9/PFN2/EPHA2/ITGB1BP1/IQSEC1/GIPC1/FOXP1/MACF1/TNFSF12/STARD13/AKT3/JUP/GPI/ABL1/BCAS3/PIK3CA/NF1/AAMP/PDCD10/TGFBR2/PDCD6/NOTCH1/RHOA	54
BP	GO:2001044	regulation of integrin-mediated signaling pathway	10/1397	22/18903	1.33517e-06	7.78664e-05	6.34331e-05	LAMC1/NID1/LAMB2/LAMA2/EMP2/TIMP1/FLNA/CD63/ITGB1BP1/CTNNA1	10
BP	GO:0035904	aorta development	17/1397	62/18903	1.60725e-06	9.27779e-05	7.55806e-05	MYLK/EDNRA/MIR145/PDGFRB/HEY2/SIX1/TBX2/PDE2A/FKBP10/JAG1/EFEMP2/LRP1/HES1/ADAMTS9/BMPR1A/RBPJ/NOTCH1	17
BP	GO:0043542	endothelial cell migration	44/1397	281/18903	1.71153e-06	9.77993e-05	7.96712e-05	FSTL1/SEMA5A/SPARC/SASH1/SMOC2/PTN/DCN/RHOJ/NR2F2/EMP2/FOXC2/PTK2/TBXA2R/PTEN/RRAS/AGT/ETS1/FGF1/ANGPT1/ITGB1/MYH9/DAB2IP/VSTM4/THBS1/ROCK2/ADAMTS9/EPHA2/ITGB1BP1/GIPC1/FOXP1/TNFSF12/STARD13/AKT3/JUP/GPI/ABL1/BCAS3/PIK3CA/NF1/AAMP/PDCD10/PDCD6/NOTCH1/RHOA	44
BP	GO:0070482	response to oxygen levels	50/1397	337/18903	1.75967e-06	9.92024e-05	8.08143e-05	PLOD1/EPAS1/EDNRA/MIR145/PDGFRB/CAV1/GUCY1A2/AJUBA/SLC2A4/ANGPTL4/PGF/ACTN4/WTIP/PTEN/SOD3/PAM/VASN/PLOD2/CD38/PDLIM1/THBS1/DDR2/ROCK2/RORA/MALAT1/LMNA/CHCHD2/FAM162A/SDHD/CDKN1B/HP1BP3/ATP6V1G1/PSEN2/BAD/CAT/SLC9A1/TMBIM6/HMOX2/BCL2/PIN1/SMAD4/NF1/ITPR1/RBPJ/STUB1/TGFBR2/CAPN2/NOTCH1/PRKAA1/RHOA	50
BP	GO:0036293	response to decreased oxygen levels	47/1397	309/18903	1.77116e-06	9.92024e-05	8.08143e-05	PLOD1/EPAS1/EDNRA/MIR145/CAV1/AJUBA/SLC2A4/ANGPTL4/PGF/ACTN4/WTIP/PTEN/SOD3/PAM/VASN/PLOD2/CD38/PDLIM1/THBS1/DDR2/ROCK2/RORA/MALAT1/LMNA/CHCHD2/FAM162A/SDHD/CDKN1B/HP1BP3/PSEN2/BAD/CAT/SLC9A1/TMBIM6/HMOX2/BCL2/PIN1/SMAD4/NF1/ITPR1/RBPJ/STUB1/TGFBR2/CAPN2/NOTCH1/PRKAA1/RHOA	47
BP	GO:0048863	stem cell differentiation	40/1397	248/18903	2.36463e-06	0.000131144	0.000106835	FRZB/FN1/EDNRA/SEMA5A/FOXC1/PTN/KITLG/TBX3/SIX1/TBX2/FOXC2/EDNRB/JAG1/RADIL/ANXA6/YAP1/LBH/ITGB1/MSX1/HES1/SEMA6D/BMPR1A/SLC9A1/RBBP7/BCL2/LTBP3/N4BP2L2/ABL1/XRCC5/HDAC1/SMAD4/PRKDC/OCIAD1/CDC42/UFL1/RBPJ/RBBP4/FAM172A/PDCD6/NOTCH1	40
BP	GO:0072073	kidney epithelium development	28/1397	146/18903	2.63721e-06	0.000144842	0.000117994	WNT6/LAMB2/EDNRA/FOXD1/FOXC1/SIX1/FOXC2/EDNRB/JAG1/KANK2/PBX1/AGT/YAP1/HEYL/FGF1/PTCH1/HES1/MAGI2/WWTR1/IQGAP1/ILK/CAT/BCL2/PKD1/SMAD4/SMAD5/ACAT1/NOTCH1	28
BP	GO:0060840	artery development	23/1397	107/18903	2.73081e-06	0.00014854	0.000121007	PRRX1/MYLK/EDNRA/MIR145/PDGFRB/FOXC1/HEY2/SIX1/TBX2/NOTCH3/PDE2A/FOXC2/FKBP10/JAG1/EFEMP2/LRP1/HES1/ADAMTS9/BMPR1A/AKT3/NF1/RBPJ/NOTCH1	23
BP	GO:0071559	response to transforming growth factor beta	43/1397	277/18903	2.81652e-06	0.000151744	0.000123616	PTPRK/COL1A2/CAV2/CAV1/MXRA5/DKK3/COL4A2/FERMT2/TGFB1I1/PDE2A/PTK2/VASN/THBS1/PDE3A/DDR2/ROCK2/FYN/ZEB1/LRRC32/LTBP1/EMILIN1/ITGB5/CDKN1C/BMPR1A/C20orf27/LATS2/GIPC1/RBBP7/ZYX/LTBP3/PIN1/PDCD5/PMEPA1/ABL1/GLG1/HDAC1/SMAD4/SMAD5/RBBP4/BCL9L/STUB1/TGFBR2/NR3C1	43
BP	GO:0034329	cell junction assembly	59/1397	430/18903	2.8945e-06	0.000154473	0.00012584	AGRN/GJA4/LAMC1/FN1/PHLDB2/CDH6/MAP1B/PTPRK/CAV1/DLC1/PARD3/CTTN/ESAM/CD9/AJUBA/FERMT2/SIX1/TJP1/CDH11/GJC1/VCL/PTK2/FARP1/PTEN/AGT/THBS1/HOPX/ROCK2/MPDZ/JAM3/DST/CLSTN1/APP/ARHGAP6/PTPRA/EPHA2/MYO1C/ITGB1BP1/RHOC/TRIP6/ACTN1/ARL2/ACTG1/MYO9A/ACTB/RYK/SLC9A1/MACF1/JUP/CTNNA1/BCL2/TLN1/ARHGEF7/ABL1/BCAS3/NPTN/CDC42/RHOA/PDLIM5	59
BP	GO:0110011	regulation of basement membrane organization	7/1397	11/18903	3.00422e-06	0.000158831	0.00012939	LAMC1/NID1/LAMB2/PHLDB2/LAMA2/DAG1/PHLDB1	7
BP	GO:0006123	mitochondrial electron transport, cytochrome c to oxygen	10/1397	24/18903	3.53071e-06	0.000184937	0.000150657	COX4I2/COX7A1/COX6C/COX5B/COX6A1/COX7A2/COX8A/COX7B/COX6B1/COX7C	10
BP	GO:1990778	protein localization to cell periphery	49/1397	337/18903	3.97331e-06	0.000204629	0.000166699	NFASC/SPTBN1/CPLX1/GPER1/EGFR/CAV1/LIN7A/TESC/EMP2/BSG/EHD2/PID1/VAMP5/KCNB1/FLNA/DAG1/ITGB1/PTCH1/GNAI1/LRP1/TMEM59/ROCK2/PTPN9/OPTN/VAMP2/ACSL3/SLC9A3R2/ARL3/CLSTN1/MYL12A/CNPY4/AP2M1/EPHA2/LGALS3/ITGB1BP1/RAB34/KIF13A/TMEM150A/ACTB/PREPL/LDLRAP1/MACF1/JUP/CD81/RER1/TMED2/CLTC/BBIP1/SEC23A	49
BP	GO:0006937	regulation of muscle contraction	31/1397	174/18903	3.97899e-06	0.000204629	0.000166699	ATP1A2/PDE5A/MIR145/GPER1/CAV1/DMD/PRKG1/PLCE1/CTTN/ARHGAP42/CACNA1C/ADORA2B/SSTR2/MYL9/HRC/TBXA2R/ADRA2C/TPM1/ANXA6/C12orf57/CALM2/PDE4D/TMEM38B/PPP1R12B/SLC9A1/JUP/SOD1/GSTO1/SRI/ATP2A2/RHOA	31
BP	GO:0003151	outflow tract morphogenesis	19/1397	80/18903	4.22447e-06	0.000213982	0.000174318	EDNRA/FOXC1/HEY2/PARVA/TBX3/SIX1/TBX2/FOXC2/JAG1/HEYL/HES1/NPY1R/BMPR1A/ILK/SMAD4/CDC42/RBPJ/TGFBR2/NOTCH1	19
BP	GO:0035633	maintenance of blood-brain barrier	12/1397	35/18903	4.26246e-06	0.000213982	0.000174318	LAMC1/SLC12A2/LAMA2/DMD/ESAM/TJP1/VCL/ANGPT1/ITGB1/JAM3/ACTG1/ACTB	12
BP	GO:1903522	regulation of blood circulation	41/1397	263/18903	4.27435e-06	0.000213982	0.000174318	ECE1/ATP1A2/RGS4/EPAS1/KCNE4/PDE5A/EDNRA/HEY2/CAV1/DMD/ARHGAP42/CACNA1C/ABCC9/ATP1B2/GJC1/TBX2/HRC/HCN2/EDNRB/TBXA2R/FLNA/ADRA2C/TPM1/CACNA2D1/FXYD1/CD38/AGT/CALM2/HOPX/TBX18/TRPC1/PDE4D/TMEM38B/THRA/SLC9A1/JUP/ABL1/GSTO1/SRI/ATP2A2/RHOA	41
BP	GO:0007517	muscle organ development	50/1397	348/18903	4.47751e-06	0.000221018	0.00018005	TTN/MYLK/EDNRA/MIR145/FOXC1/HEY2/LAMA2/SGCE/CAV2/CAV1/DMD/IGF2/TAGLN/ITGA7/SIX1/NR2F2/NUPR1/HLF/FOXC2/VAMP5/LEF1/UTRN/TPM1/SGCA/SMTN/HEYL/SVIL/ETV1/DAG1/ITGB1/EFEMP2/MYL6/SGCB/MSX1/FHL1/ID3/CFL2/BMPR1A/DDX17/UNC45A/BCL2/MYL6B/SMAD4/NF1/SRI/RBPJ/BCL9L/NOTCH1/PRKAA1/RHOA	50
BP	GO:0060070	canonical Wnt signaling pathway	46/1397	310/18903	4.49303e-06	0.000221018	0.00018005	FRZB/IGFBP2/WNT6/RBMS3/EDNRA/SEMA5A/FOXD1/MIR145/DAAM2/EGFR/CAV1/DKK3/GPC5/IGFBP6/LEF1/EDNRB/WLS/PTEN/TLE1/YAP1/AXIN2/IGFBP4/DAB2IP/TBX18/MCC/CDK14/WWTR1/NKD1/JADE1/CSNK1E/PLEKHA4/TMEM9/ILK/ATP6AP2/LATS2/RYK/TTC21B/JUP/RBX1/PIN1/HDAC1/LZTS2/RBPJ/BCL9L/STK3/NOTCH1	46
BP	GO:0010632	regulation of epithelial cell migration	44/1397	292/18903	4.80703e-06	0.000234426	0.000190973	PTPRG/SEMA5A/SPARC/SASH1/SMOC2/PTN/DCN/RHOJ/NR2F2/EMP2/FOXC2/PTK2/TBXA2R/PTEN/RRAS/AGT/ETS1/FGF1/ANGPT1/DOCK1/DAB2IP/THBS1/ROCK2/MCC/ADAMTS9/PFN2/EPHA2/ITGB1BP1/IQSEC1/FOXP1/MACF1/STARD13/AKT3/JUP/GPI/ABL1/BCAS3/NF1/AAMP/PDCD10/TGFBR2/PDCD6/NOTCH1/RHOA	44
BP	GO:0051017	actin filament bundle assembly	29/1397	160/18903	5.68835e-06	0.000275034	0.000224054	MYO1B/PHLDB2/CALD1/PLS3/DLC1/EPS8/PAWR/FERMT2/TJP1/FLNA/TPM1/PDLIM1/LIMA1/ROCK2/SYNPO2/SORBS3/ARHGAP6/PFN2/ITGB1BP1/RHOC/ACTN1/ITGB5/ADD1/ACTG1/SLC9A1/ZYX/ABL1/CDC42/RHOA	29
BP	GO:0042176	regulation of protein catabolic process	51/1397	361/18903	5.87266e-06	0.000281539	0.000229353	TRIB2/SH3D19/FOXF2/EGFR/CAV1/NUPR1/TIMP3/TIMP1/RNF180/FLNA/NQO1/AXIN2/DAB2IP/NDUFA13/LRP1/SH3RF1/FYN/NKD1/TMTC3/PARK7/CSNK1E/ATRAID/SUMO2/USP13/CDKN1B/BBS7/TMEM9/LAPTM4B/PSME1/MAP1A/GIPC1/TNFSF12/ANXA2/CTSA/CD81/RBX1/PIN1/PKD1/FBXL5/VPS28/SVIP/SMAD4/NDFIP1/UFL1/DDRGK1/CBLB/OAZ2/PSMC3/STUB1/PSMC5/PSMF1	51
BP	GO:0071711	basement membrane organization	12/1397	36/18903	5.96527e-06	0.000283576	0.000231012	LAMC1/NID1/LAMB2/PHLDB2/LAMA2/CAV2/CAV1/NTN4/COL4A1/DAG1/ITGB1/PHLDB1	12
BP	GO:0001837	epithelial to mesenchymal transition	30/1397	169/18903	6.10497e-06	0.000287798	0.000234452	PHLDB2/EDNRA/FOXF2/FOXC1/HEY2/TBX3/FERMT2/EMP2/TGFB1I1/PTK2/LEF1/JAG1/PTEN/FLNA/VASN/AXIN2/HEYL/DAG1/DAB2IP/MSX1/ROCK2/WWTR1/PHLDB1/DDX17/SMAD4/RBPJ/BCL9L/TGFBR2/PDCD6/NOTCH1	30
BP	GO:0097084	vascular associated smooth muscle cell development	7/1397	12/18903	6.74802e-06	0.000315484	0.000257006	EDNRA/HEY2/NFATC4/EFEMP2/SGCB/HES1/NOTCH1	7
BP	GO:0010761	fibroblast migration	15/1397	55/18903	7.03843e-06	0.000326364	0.000265869	TNS1/MIR145/CD248/PTK2/PDLIM1/ITGB1/THBS1/DDR2/ACTA2/SGPL1/AKAP12/ITGB1BP1/IQGAP1/ILK/ARHGEF7	15
BP	GO:0048738	cardiac muscle tissue development	38/1397	241/18903	7.22882e-06	0.000332467	0.000270841	RGS4/FHL2/TTN/EDNRA/PDGFRB/FOXC1/HEY2/NEBL/TBX3/GJC1/TBX2/FOXC2/PTEN/TPM1/AGT/YAP1/ITGB1/HOPX/SGCB/MSX1/TBX18/PRKAR1A/ADAMTS9/LMNA/SORBS2/BMPR1A/SLC9A1/SAV1/FOXP1/ABL1/NDUFV2/SMAD4/SMAD5/CDC42/RBPJ/TGFBR2/NOTCH1/PDLIM5	38
BP	GO:0071560	cellular response to transforming growth factor beta stimulus	41/1397	271/18903	9.06184e-06	0.000411367	0.000335116	PTPRK/COL1A2/CAV2/CAV1/DKK3/COL4A2/FERMT2/TGFB1I1/PDE2A/PTK2/VASN/THBS1/PDE3A/DDR2/FYN/ZEB1/LRRC32/LTBP1/EMILIN1/ITGB5/CDKN1C/BMPR1A/C20orf27/LATS2/GIPC1/RBBP7/ZYX/LTBP3/PIN1/PDCD5/PMEPA1/ABL1/GLG1/HDAC1/SMAD4/SMAD5/RBBP4/BCL9L/STUB1/TGFBR2/NR3C1	41
BP	GO:0035296	regulation of tube diameter	27/1397	147/18903	9.16249e-06	0.000411367	0.000335116	ECE1/ATP1A2/EDNRA/ITGA1/FOXC1/GPER1/CAV1/PRKG1/ARHGAP42/ADORA2B/FOXC2/EDNRB/TBXA2R/ADRA2C/SOD3/CD38/ADCY6/AGT/VSTM4/ROCK2/ACTA2/ITGB1BP1/GCLM/EXT2/ABL1/SOD1/RHOA	27
BP	GO:0097746	blood vessel diameter maintenance	27/1397	147/18903	9.16249e-06	0.000411367	0.000335116	ECE1/ATP1A2/EDNRA/ITGA1/FOXC1/GPER1/CAV1/PRKG1/ARHGAP42/ADORA2B/FOXC2/EDNRB/TBXA2R/ADRA2C/SOD3/CD38/ADCY6/AGT/VSTM4/ROCK2/ACTA2/ITGB1BP1/GCLM/EXT2/ABL1/SOD1/RHOA	27
BP	GO:0061572	actin filament bundle organization	29/1397	164/18903	9.36491e-06	0.000417144	0.000339822	MYO1B/PHLDB2/CALD1/PLS3/DLC1/EPS8/PAWR/FERMT2/TJP1/FLNA/TPM1/PDLIM1/LIMA1/ROCK2/SYNPO2/SORBS3/ARHGAP6/PFN2/ITGB1BP1/RHOC/ACTN1/ITGB5/ADD1/ACTG1/SLC9A1/ZYX/ABL1/CDC42/RHOA	29
BP	GO:0035150	regulation of tube size	27/1397	148/18903	1.04306e-05	0.000460985	0.000375537	ECE1/ATP1A2/EDNRA/ITGA1/FOXC1/GPER1/CAV1/PRKG1/ARHGAP42/ADORA2B/FOXC2/EDNRB/TBXA2R/ADRA2C/SOD3/CD38/ADCY6/AGT/VSTM4/ROCK2/ACTA2/ITGB1BP1/GCLM/EXT2/ABL1/SOD1/RHOA	27
BP	GO:0060048	cardiac muscle contraction	26/1397	140/18903	1.08593e-05	0.00047621	0.00038794	ATP1A2/TTN/KCNE4/PDE5A/CAV1/DMD/CACNA1C/KCNJ8/ABCC9/GJC1/HRC/FLNA/TPM1/CACNA2D1/CALM2/MAP2K6/PDE4D/TMEM38B/SLC9A1/JUP/PIK3CA/GSTO1/SMAD5/SRI/GSN/ATP2A2	26
BP	GO:1903053	regulation of extracellular matrix organization	15/1397	57/18903	1.1338e-05	0.000493376	0.000401924	LAMC1/NID1/LAMB2/PHLDB2/LAMA2/AGT/DAG1/EFEMP2/LRP1/DDR2/AEBP1/PHLDB1/EMILIN1/ABL1/NOTCH1	15
BP	GO:0010763	positive regulation of fibroblast migration	8/1397	17/18903	1.15833e-05	0.000500202	0.000407485	MIR145/PTK2/ITGB1/THBS1/DDR2/ACTA2/AKAP12/ARHGEF7	8
BP	GO:0007178	transmembrane receptor protein serine/threonine kinase signaling pathway	53/1397	390/18903	1.20297e-05	0.000515544	0.000419983	SPTBN1/FSTL1/FOXD1/PTPRK/COL1A2/CAV2/CAV1/RBPMS/DKK3/FERMT2/TGFB1I1/PTK2/LEF1/VIM/VASN/CRIM1/THBS1/RBPMS2/MSX1/LRP1/HES1/MAGI2/NBL1/WWTR1/ZEB1/LRRC32/PPM1L/PELO/LTBP1/EMILIN1/ITGB5/CDKN1C/BMPR1A/ILK/C20orf27/LATS2/GIPC1/RBBP7/ZYX/LTBP3/PIN1/PMEPA1/ABL1/GLG1/HDAC1/SMAD4/SMAD5/RBPJ/RBBP4/BCL9L/STUB1/TGFBR2/NOTCH1	53
BP	GO:2001046	positive regulation of integrin-mediated signaling pathway	7/1397	13/18903	1.36847e-05	0.000582062	0.000474171	LAMC1/NID1/LAMB2/LAMA2/EMP2/FLNA/CD63	7
BP	GO:0014706	striated muscle tissue development	39/1397	257/18903	1.38232e-05	0.000583567	0.000475397	RGS4/FHL2/TTN/EDNRA/PDGFRB/FOXC1/HEY2/NEBL/TBX3/GJC1/TBX2/FOXC2/LEF1/PTEN/TPM1/AGT/YAP1/ITGB1/HOPX/SGCB/MSX1/TBX18/PRKAR1A/ADAMTS9/LMNA/SORBS2/BMPR1A/SLC9A1/SAV1/FOXP1/ABL1/NDUFV2/SMAD4/SMAD5/CDC42/RBPJ/TGFBR2/NOTCH1/PDLIM5	39
BP	GO:0035051	cardiocyte differentiation	28/1397	159/18903	1.43626e-05	0.000601845	0.000490288	RGS4/FHL2/TTN/EDNRA/MIR145/PDGFRB/HEY2/GPER1/EGFR/NEBL/TBX3/TBX2/JAG1/AGT/ITGB1/SGCB/TBX18/HES1/LMNA/SORBS2/BMPR1A/SLC9A1/FOXP1/SMAD4/CDC42/RBPJ/NOTCH1/PDLIM5	28
BP	GO:0010594	regulation of endothelial cell migration	36/1397	230/18903	1.47003e-05	0.000611469	0.000498127	SEMA5A/SPARC/SASH1/SMOC2/PTN/DCN/RHOJ/NR2F2/EMP2/FOXC2/PTK2/TBXA2R/RRAS/AGT/ETS1/FGF1/ANGPT1/DAB2IP/THBS1/ROCK2/ADAMTS9/EPHA2/ITGB1BP1/FOXP1/STARD13/AKT3/JUP/GPI/ABL1/BCAS3/NF1/AAMP/PDCD10/PDCD6/NOTCH1/RHOA	36
BP	GO:0062197	cellular response to chemical stress	48/1397	345/18903	1.64735e-05	0.00067624	0.000550892	PRKAA2/EPAS1/EFHD1/MYLK/EDNRA/PTPRK/EGFR/CAV1/PAWR/SLC2A4/PRODH/TPM1/SOD3/NQO1/SLC7A11/STK39/PLA2R1/DDR2/MAP1LC3A/FYN/CHCHD2/PRDX2/PARK7/ERCC6L2/BAD/TXN/NFE2L1/CAT/PDE8A/FOXP1/PPARGC1B/RBX1/AXL/BCL2/PRDX5/STX2/SLC25A24/ABL1/XRCC5/SOD1/PIK3CA/SERPINB6/STK24/PDCD10/ATP2A2/ROMO1/MGMT/PRKAA1	48
BP	GO:0000302	response to reactive oxygen species	33/1397	204/18903	1.64966e-05	0.00067624	0.000550892	PDGFRB/PTPRK/EGFR/PAWR/TPM1/SOD3/NQO1/TXNIP/DDR2/MAP1LC3A/GSTP1/FYN/PRDX2/PARK7/SESN3/ERCC6L2/BAD/TXN/CAT/PDE8A/FOXP1/PPARGC1B/AXL/BCL2/PRDX5/ABL1/PPP2CB/SOD1/STK24/PDCD10/CAPN2/ROMO1/PRKAA1	33
BP	GO:0030111	regulation of Wnt signaling pathway	47/1397	336/18903	1.74656e-05	0.000710812	0.000579056	FRZB/IGFBP2/RBMS3/SEMA5A/MIR145/DAAM2/EGFR/CAV1/DKK3/GPC5/NFATC4/IGFBP6/LEF1/WLS/TLE1/YAP1/AXIN2/IGFBP4/DAB2IP/TBX18/LRP1/MCC/CDK14/APCDD1/WWTR1/NKD1/APP/JADE1/CSNK1E/PLEKHA4/TMEM9/ILK/ATP6AP2/LATS2/TTC21B/MACF1/JUP/RBX1/PIN1/ABL1/HDAC1/LZTS2/PBXIP1/RBPJ/PPP2R1A/STK3/NOTCH1	47
BP	GO:0003272	endocardial cushion formation	10/1397	28/18903	1.79688e-05	0.000726069	0.000591485	HEY2/TBX3/TBX2/HEYL/MSX1/BMPR1A/SMAD4/RBPJ/TGFBR2/NOTCH1	10
BP	GO:0008016	regulation of heart contraction	34/1397	214/18903	1.82556e-05	0.000732426	0.000596664	ATP1A2/RGS4/EPAS1/KCNE4/PDE5A/EDNRA/HEY2/CAV1/DMD/CACNA1C/ABCC9/ATP1B2/GJC1/TBX2/HRC/HCN2/EDNRB/FLNA/TPM1/CACNA2D1/FXYD1/AGT/CALM2/HOPX/TBX18/TRPC1/PDE4D/TMEM38B/THRA/SLC9A1/JUP/GSTO1/SRI/ATP2A2	34
BP	GO:0009187	cyclic nucleotide metabolic process	12/1397	40/18903	2.01825e-05	0.000804029	0.000654995	PDE5A/PDE8B/PDE7B/GUCY1A2/PDE2A/ADCY6/ADCY9/RORA/EPHA2/ADCY3/PDE4D/PDE8A	12
BP	GO:0051145	smooth muscle cell differentiation	17/1397	74/18903	2.13594e-05	0.000844966	0.000688343	EDNRA/MIR145/HEY2/GPER1/TBX3/NFATC4/SIX1/TMEM204/TBX2/EDNRB/EFEMP2/RBPMS2/SGCB/TBX18/HES1/ZEB1/NOTCH1	17
BP	GO:0035265	organ growth	30/1397	180/18903	2.19062e-05	0.000860579	0.000701063	ECM1/RGS4/PDGFRB/FOXC1/HEY2/IGF2/TBX2/FOXC2/PTEN/ANXA6/AGT/YAP1/COL27A1/DDR2/PRKAR1A/TMEM38B/SORBS2/BMPR1A/LATS2/SAV1/FOXP1/BCL2/ABL1/SOD1/WWC3/RBPJ/STK3/TGFBR2/NOTCH1/PDLIM5	30
BP	GO:1905475	regulation of protein localization to membrane	29/1397	172/18903	2.38819e-05	0.000931722	0.000759018	SPTBN1/GPER1/EGFR/GPC5/PID1/KCNB1/SLC7A11/STOM/DAG1/ITGB1/LRP1/TMEM59/PTPN9/ACSL3/FYN/CNPY4/AP2M1/EPHA2/LGALS3/MYO1C/ITGB1BP1/ACTB/LDLRAP1/CD81/PDCD5/FIS1/RER1/CLTC/GSN	29
BP	GO:0030705	cytoskeleton-dependent intracellular transport	33/1397	208/18903	2.48111e-05	0.000961345	0.00078315	MYO1B/MAP2/MAP1B/SYNE2/ACTN4/MYO6/DYNC1I1/KIF5C/ARL3/DST/BLOC1S1/APP/SUN1/DYNC2H1/DYNLL1/MYO1C/FEZ1/ACTR10/KIF13A/DYNC1I2/TUBA1A/WASL/MAP1A/KIFAP3/TTC21B/HSPB11/SOD1/DYNC1H1/IFT57/KIF3A/AP3S1/CDC42/HOOK3	33
BP	GO:0001765	membrane raft assembly	6/1397	10/18903	2.61164e-05	0.00100504	0.000818744	CAV2/CAV1/EMP2/RFTN1/PACSIN2/ANXA2	6
BP	GO:0030834	regulation of actin filament depolymerization	14/1397	54/18903	2.65773e-05	0.00101586	0.000827562	SPTBN1/SEMA5A/EPS8/SVIL/LIMA1/DSTN/LMOD1/PLEKHH2/CFL2/ADD3/ADD1/PIK3CA/GSN/TMOD3	14
BP	GO:2000146	negative regulation of cell motility	51/1397	383/18903	3.03488e-05	0.00115224	0.000938659	PTPRG/PHLDB2/MIR145/PTPRK/DLC1/PRKG1/IFITM1/DCN/DACH1/NR2F2/ATP1B2/FBLN1/VCL/IGFBP5/TBXA2R/TIMP1/JAG1/PTEN/TPM1/RRAS/DAG1/DAB2IP/THBS1/LRP1/CLIC4/MAGI2/MCC/NBL1/ADAMTS9/PFN2/SEMA6D/EMILIN1/ITGB1BP1/WASL/BMPR1A/ABHD2/CNN2/STARD13/JUP/RBBP7/CTNNA1/BCL2/PIN1/MIF/HDAC1/NF1/STK24/RBBP4/PDCD10/NOTCH1/RHOA	51
BP	GO:0072659	protein localization to plasma membrane	41/1397	285/18903	3.05826e-05	0.00115337	0.000939583	NFASC/SPTBN1/GPER1/EGFR/TESC/EMP2/BSG/EHD2/PID1/VAMP5/KCNB1/FLNA/ITGB1/PTCH1/LRP1/TMEM59/ROCK2/PTPN9/OPTN/VAMP2/ACSL3/SLC9A3R2/MYL12A/CNPY4/AP2M1/EPHA2/LGALS3/ITGB1BP1/RAB34/KIF13A/TMEM150A/ACTB/PREPL/LDLRAP1/MACF1/JUP/CD81/RER1/TMED2/CLTC/SEC23A	41
BP	GO:0072132	mesenchyme morphogenesis	14/1397	55/18903	3.32491e-05	0.00124563	0.00101474	FOXC1/HEY2/TBX3/TBX2/FOXC2/LEF1/HEYL/MSX1/ACTA2/BMPR1A/SMAD4/RBPJ/TGFBR2/NOTCH1	14
BP	GO:0003007	heart morphogenesis	38/1397	258/18903	3.49138e-05	0.00129939	0.00105854	FHL2/TTN/EDNRA/CPE/FOXC1/HEY2/SMARCD3/DLC1/PARVA/TBX3/SIX1/EMP2/TBX2/CCM2L/FOXC2/PTK2/JAG1/FLNA/TPM1/YAP1/AXIN2/HEYL/PTCH1/MSX1/HES1/NPY1R/BBS7/BMPR1A/ILK/ADAMTS1/SAV1/IFT57/TMED2/SMAD4/CDC42/RBPJ/TGFBR2/NOTCH1	38
BP	GO:1903036	positive regulation of response to wounding	17/1397	77/18903	3.69557e-05	0.00136639	0.00111312	F3/MYLK/SMOC2/PTN/FERMT2/FOXC2/PTK2/TBXA2R/FLNA/ITGB1/THBS1/ANO6/DDR2/PRDX2/EMILIN1/ACTG1/STK24	17
BP	GO:0006081	cellular aldehyde metabolic process	16/1397	70/18903	3.95866e-05	0.00144478	0.00117698	DKK3/EDNRB/AKR1C1/ADH5/GLO1/ESD/PARK7/TPI1/HYI/PNKD/ALDH7A1/GRHPR/AKR7A2/HAGH/RDH11/DHRS4L2	16
BP	GO:0030193	regulation of blood coagulation	16/1397	70/18903	3.95866e-05	0.00144478	0.00117698	F3/TFPI/CAV1/PRKG1/CD9/C1QTNF1/TBXA2R/TSPAN8/SERPING1/THBS1/ANO6/PRDX2/EMILIN1/PROS1/ANXA2/VKORC1	16
BP	GO:0010811	positive regulation of cell-substrate adhesion	23/1397	125/18903	3.99431e-05	0.00144845	0.00117997	NID1/FN1/EDIL3/ECM2/FERMT2/EMP2/CCDC80/FLNA/UTRN/RRAS/DAG1/DOCK1/EFEMP2/RSU1/EMILIN1/ITGB1BP1/ARL2/ILK/HSD17B12/JUP/ARHGEF7/ABL1/CDC42	23
BP	GO:0060828	regulation of canonical Wnt signaling pathway	38/1397	260/18903	4.14728e-05	0.00149434	0.00121735	FRZB/IGFBP2/RBMS3/SEMA5A/MIR145/DAAM2/EGFR/CAV1/DKK3/GPC5/IGFBP6/WLS/TLE1/YAP1/AXIN2/IGFBP4/DAB2IP/TBX18/MCC/CDK14/WWTR1/NKD1/JADE1/CSNK1E/PLEKHA4/TMEM9/ILK/ATP6AP2/LATS2/TTC21B/JUP/RBX1/PIN1/HDAC1/LZTS2/RBPJ/STK3/NOTCH1	38
BP	GO:0061337	cardiac conduction	20/1397	101/18903	4.23981e-05	0.00151072	0.00123069	ATP1A2/KCNE4/CAV1/CACNA1C/ABCC9/ATP1B2/GJC1/HRC/HCN2/FLNA/CACNA2D1/AGT/CALM2/TBX18/TRPC1/PDE4D/SLC9A1/JUP/SRI/ATP2A2	20
BP	GO:0006790	sulfur compound metabolic process	46/1397	338/18903	4.27285e-05	0.00151072	0.00123069	EDNRA/BGN/DCN/GGT5/GGT1/EDNRB/CHST2/SULT1A1/GLRX5/PAPSS2/SLC7A11/ANGPT1/B3GNT2/TECR/GSTP1/ACSL3/GLO1/GSTA4/SUCLG1/PARK7/DSEL/NDUFAB1/PDHB/ICMT/BOLA3/HSD17B12/ADI1/CSAD/GSTK1/GSTT1/DSE/ELOVL5/CHST7/ISCA1/SUCLA2/GCLM/EXT2/AASS/NFU1/SOD1/GSTO1/MRI1/HSD17B4/HAGH/ACAT1/ISCU	46
BP	GO:0090287	regulation of cellular response to growth factor stimulus	46/1397	338/18903	4.27285e-05	0.00151072	0.00123069	FSTL1/FOXD1/SMOC2/CAV2/CAV1/DKK3/DCN/TMEM204/TGFB1I1/EPN2/CD63/VASN/AGT/CRIM1/FGF1/DAB2IP/THBS1/RBPMS2/MSX1/CADM4/HES1/NBL1/ZEB1/PELO/LTBP1/MYO1C/EMILIN1/CDKN1C/ILK/C20orf27/LATS2/GIPC1/RBBP7/PIN1/PMEPA1/ABL1/GLG1/HDAC1/SMAD4/NPTN/RBPJ/RBBP4/BCL9L/STUB1/PDCD6/NOTCH1	46
BP	GO:0090150	establishment of protein localization to membrane	39/1397	270/18903	4.31506e-05	0.00151617	0.00123513	SPTBN1/CPLX1/EGFR/PARD3/RFTN1/VAMP5/KCNB1/STOM/NDUFA13/OPTN/VAMP2/ACSL3/FYN/CLSTN1/SRP14/EMC2/ATAD1/MYO1C/ITGB1BP1/RAB34/SSR3/KIF13A/ICMT/EMC7/CHM/PREPL/MACF1/SEC61G/RAB11B/PDCD5/SRP9/SEC62/FIS1/WDR83OS/TIMM8B/EMC4/ROMO1/TIMM13/SEC61B	39
BP	GO:0086064	cell communication by electrical coupling involved in cardiac conduction	9/1397	25/18903	4.41723e-05	0.00154249	0.00125657	ATP1A2/CAV1/CACNA1C/ATP1B2/GJC1/HRC/CALM2/PDE4D/SRI	9
BP	GO:0003214	cardiac left ventricle morphogenesis	7/1397	15/18903	4.49675e-05	0.00156062	0.00127134	EDNRA/CPE/HEY2/SMAD4/RBPJ/TGFBR2/NOTCH1	7
BP	GO:0038127	ERBB signaling pathway	23/1397	126/18903	4.54999e-05	0.00156947	0.00127855	SLC30A10/ITGA1/GPER1/EGFR/PLCE1/AFAP1L2/PTK2/AGT/DAB2IP/HIP1/WDR54/IFI6/IQGAP1/PTPN12/VPS25/CPNE3/RNF115/ABL1/PIK3CA/MVB12A/CBLB/RBPJ/STUB1	23
BP	GO:2001238	positive regulation of extrinsic apoptotic signaling pathway	13/1397	50/18903	4.96299e-05	0.00169416	0.00138013	GPER1/CAV1/TIMP3/PTEN/AGT/ITM2C/THBS1/TNFSF12/PPP2R1B/CTNNA1/NF1/PPP2R1A/STK3	13
BP	GO:0010038	response to metal ion	48/1397	360/18903	4.97139e-05	0.00169416	0.00138013	PRKAA2/SLC30A10/TTN/IGFBP2/SLC6A1/TRPC3/SLC12A2/EGFR/CAV1/NFATC4/BSG/KCNB1/SOD3/PAM/NQO1/TXNIP/STK39/CALM2/THBS1/RASGRP2/MAP1LC3A/CLIC4/TRPC1/APP/CRIP1/PARK7/IQGAP1/CDKN1B/ADD1/ACTG1/BAD/MT1E/CAT/CYBRD1/CPNE3/KMT2A/MNAT1/BCL2/CUTA/SLC25A24/GPI/SLC40A1/PPP2CB/SOD1/SYT11/HVCN1/PDCD6/PRKAA1	48
BP	GO:0030199	collagen fibril organization	15/1397	64/18903	5.0205e-05	0.00170066	0.00138542	COL5A2/FOXC1/COL1A2/COL14A1/LUM/COL5A3/FOXC2/FKBP10/EFEMP2/DDR2/AEBP1/EMILIN1/BMP1/ANXA2/NF1	15
BP	GO:0007179	transforming growth factor beta receptor signaling pathway	33/1397	216/18903	5.37982e-05	0.00181152	0.00147574	PTPRK/COL1A2/CAV2/CAV1/DKK3/FERMT2/TGFB1I1/PTK2/VASN/THBS1/ZEB1/LRRC32/LTBP1/EMILIN1/ITGB5/CDKN1C/BMPR1A/C20orf27/LATS2/GIPC1/RBBP7/ZYX/LTBP3/PIN1/PMEPA1/GLG1/HDAC1/SMAD4/SMAD5/RBBP4/BCL9L/STUB1/TGFBR2	33
BP	GO:0048145	regulation of fibroblast proliferation	18/1397	87/18903	5.52566e-05	0.00184962	0.00150678	FN1/PDGFRB/EGFR/CAV1/CD248/PAWR/DACH1/NUPR1/AGT/DAB2IP/S100A6/DDR2/GSTP1/NDUFS4/KMT2A/MIF/ABL1/NF1	18
BP	GO:0051098	regulation of binding	49/1397	372/18903	5.69663e-05	0.0018888	0.0015387	MAP2/FOXC1/HEY2/CAV1/SMARCD3/NFATC4/DZIP1/LEF1/PLCL1/ANGPT1/CALM2/HOPX/MSX1/LRP1/HES1/NUCKS1/LRPAP1/APP/CCPG1/PARK7/CSNK1E/ITGB1BP1/C4orf3/CAMK1/ADD1/TXN/LAMTOR5/ACTB/LDLRAP1/ANXA2/TMBIM6/PIN1/ARHGEF7/CLN5/PKD1/ABL1/PPP2CB/EDF1/USP33/SMAD4/CDC42/SRI/DDRGK1/PBXIP1/CBLB/IFIT1/ATP2A2/STUB1/STK3	49
BP	GO:1900046	regulation of hemostasis	16/1397	72/18903	5.70948e-05	0.0018888	0.0015387	F3/TFPI/CAV1/PRKG1/CD9/C1QTNF1/TBXA2R/TSPAN8/SERPING1/THBS1/ANO6/PRDX2/EMILIN1/PROS1/ANXA2/VKORC1	16
BP	GO:0051146	striated muscle cell differentiation	41/1397	293/18903	5.8173e-05	0.00191328	0.00155864	RGS4/FHL2/TTN/PDGFRB/HEY2/CAV2/NEBL/IGF2/CD9/CSRP2/TBX3/SIX1/MYL9/EHD2/IGFBP5/TPM1/AGT/ITGB1/MYH9/DOCK1/HOPX/SGCB/MSX1/TBX18/PRKAR1A/LMOD1/LMNA/CFL2/SORBS2/ACTG1/BMPR1A/SLC9A1/FOXP1/CD81/BCL2/SMAD4/RBPJ/TMOD3/CAPN2/NOTCH1/PDLIM5	41
BP	GO:0061448	connective tissue development	39/1397	274/18903	5.99463e-05	0.00196021	0.00159686	ECM1/PRRX1/FRZB/PTH1R/FOXD1/PDGFRB/BGN/MGP/FOXC2/TIMP1/ANXA6/AXIN2/GPR4/COL27A1/MSX1/MBOAT2/ACTA2/ZEB1/CRIP1/SLC39A13/ZBTB16/THRA/PGRMC2/BMPR1A/BMP1/LTBP3/EXT2/PKD1/GLG1/PIK3CA/TRIP11/SMAD5/DDRGK1/PBXIP1/NCOA2/ACAT1/TGFBR2/NOTCH1/RASAL2	39
BP	GO:1904019	epithelial cell apoptotic process	24/1397	137/18903	6.24963e-05	0.00201808	0.00164401	COL4A3/EDNRA/SEMA5A/GPER1/CD248/NUPR1/ANGPTL4/LEF1/YAP1/ANGPT1/PLA2R1/DAB2IP/THBS1/ANO6/CDKN1B/BAD/SAV1/BCL2/ABL1/CAST/GSN/STK3/TGFBR2/PRKAA1	24
BP	GO:0006941	striated muscle contraction	29/1397	181/18903	6.26564e-05	0.00201808	0.00164401	ATP1A2/TTN/KCNE4/PDE5A/CAV1/DMD/CACNA1C/KCNJ8/ABCC9/SYNM/GJC1/HRC/FLNA/TPM1/CACNA2D1/C12orf57/CALM2/ALDOA/MAP2K6/PDE4D/TMEM38B/SLC9A1/JUP/PIK3CA/GSTO1/SMAD5/SRI/GSN/ATP2A2	29
BP	GO:0061005	cell differentiation involved in kidney development	14/1397	58/18903	6.28419e-05	0.00201808	0.00164401	LAMB2/EDNRA/FOXC2/EDNRB/JAG1/YAP1/GPR4/PTCH1/HES1/MAGI2/ACTA2/WWTR1/IQGAP1/NOTCH1	14
BP	GO:0010882	regulation of cardiac muscle contraction by calcium ion signaling	9/1397	26/18903	6.31431e-05	0.00201808	0.00164401	ATP1A2/DMD/CACNA1C/HRC/CALM2/TMEM38B/SLC9A1/GSTO1/ATP2A2	9
BP	GO:0001649	osteoblast differentiation	36/1397	246/18903	6.35604e-05	0.00202001	0.00164558	FHL2/PTH1R/RANBP3L/IFITM1/IGF2/FERMT2/COL6A1/GABBR1/IGFBP5/PTK2/LEF1/JAG1/YAP1/AXIN2/CRIM1/PTCH1/DDR2/PDLIM7/WWTR1/MAP2K6/ID3/BCAP29/EPHA2/ATRAID/TPM4/BMPR1A/MRC2/ILK/CAT/SMAD4/HSD17B4/CLTC/NF1/SMAD5/UFL1/NOTCH1	36
BP	GO:0014033	neural crest cell differentiation	19/1397	96/18903	6.58363e-05	0.00208065	0.00169498	FRZB/FN1/EDNRA/SEMA5A/FOXC1/KITLG/SIX1/FOXC2/EDNRB/JAG1/RADIL/ANXA6/HES1/SEMA6D/BMPR1A/SMAD4/CDC42/FAM172A/PDCD6	19
BP	GO:0043393	regulation of protein binding	31/1397	200/18903	6.78272e-05	0.00213166	0.00173654	MAP2/CAV1/SMARCD3/NFATC4/DZIP1/PLCL1/ANGPT1/HOPX/LRP1/LRPAP1/APP/PARK7/CSNK1E/ITGB1BP1/CAMK1/ADD1/ACTB/LDLRAP1/ANXA2/TMBIM6/PIN1/PKD1/ABL1/PPP2CB/USP33/CDC42/CBLB/IFIT1/ATP2A2/STUB1/STK3	31
BP	GO:0032386	regulation of intracellular transport	45/1397	336/18903	7.58613e-05	0.00237098	0.0019315	MAP2/ZIC1/MAP1B/PKIG/EHD2/KCNB1/FLNA/STOM/ANGPT1/VAMP2/LEPROT/FYN/PPP1R12A/IFI27/PARK7/MYO1C/FEZ1/ITGB1BP1/UBL5/CAMK1/TXN/MTMR2/RUFY3/LDLRAP1/TTC21B/ANXA2/JUP/CD81/RAB11B/PDCD5/ERLEC1/PPP1CC/DYNC1H1/FIS1/BCAS3/LMAN1/SVIP/THOC2/NF1/REEP5/PDCD10/OAZ2/SCP2/ARHGAP1/PRKAA1	45
BP	GO:0007219	Notch signaling pathway	29/1397	183/18903	7.67274e-05	0.00237557	0.00193523	CDH6/FOXC1/HEY2/S1PR3/SIX1/TBX2/NOTCH3/FOXC2/NEURL1B/JAG1/EPN2/DTX3/YAP1/HEYL/HES1/APP/GMDS/ITGB1BP1/CD46/CDKN1B/SORBS2/PSEN2/EGFL7/MAML2/BCL6/RBPJ/PDCD10/TGFBR2/NOTCH1	29
BP	GO:0030042	actin filament depolymerization	14/1397	59/18903	7.6848e-05	0.00237557	0.00193523	SPTBN1/SEMA5A/EPS8/SVIL/LIMA1/DSTN/LMOD1/PLEKHH2/CFL2/ADD3/ADD1/PIK3CA/GSN/TMOD3	14
BP	GO:0048660	regulation of smooth muscle cell proliferation	28/1397	175/18903	8.52865e-05	0.00261979	0.00213419	MIR145/PDGFRB/GPER1/PRKG1/NOTCH3/IGFBP5/PTEN/TPM1/AGT/EFEMP2/THBS1/RBPMS2/DDR2/NDRG2/CDKN1B/BMPR1A/ADAMTS1/LDLRAP1/FOXP1/MNAT1/XRCC5/HDAC1/PIK3CA/NF1/PRKDC/XRCC6/TGFBR2/RHOA	28
BP	GO:0040013	negative regulation of locomotion	53/1397	419/18903	8.56803e-05	0.00261979	0.00213419	PTPRG/PHLDB2/SEMA5A/MIR145/PTPRK/DLC1/PRKG1/IFITM1/DCN/DACH1/NR2F2/ATP1B2/FBLN1/VCL/IGFBP5/TBXA2R/TIMP1/JAG1/PTEN/TPM1/RRAS/DAG1/DAB2IP/THBS1/LRP1/CLIC4/MAGI2/MCC/NBL1/ADAMTS9/PFN2/SEMA6D/EMILIN1/ITGB1BP1/WASL/BMPR1A/ABHD2/RYK/CNN2/STARD13/JUP/RBBP7/CTNNA1/BCL2/PIN1/MIF/HDAC1/NF1/STK24/RBBP4/PDCD10/NOTCH1/RHOA	53
BP	GO:0030336	negative regulation of cell migration	48/1397	368/18903	8.61378e-05	0.00261979	0.00213419	PTPRG/PHLDB2/MIR145/PTPRK/DLC1/PRKG1/IFITM1/DCN/DACH1/NR2F2/ATP1B2/VCL/IGFBP5/TBXA2R/TIMP1/JAG1/PTEN/TPM1/RRAS/DAG1/DAB2IP/THBS1/LRP1/CLIC4/MAGI2/MCC/NBL1/ADAMTS9/PFN2/SEMA6D/EMILIN1/ITGB1BP1/WASL/BMPR1A/ABHD2/CNN2/STARD13/JUP/RBBP7/BCL2/MIF/HDAC1/NF1/STK24/RBBP4/PDCD10/NOTCH1/RHOA	48
BP	GO:0055006	cardiac cell development	18/1397	90/18903	8.80819e-05	0.00266459	0.00217069	RGS4/FHL2/TTN/PDGFRB/HEY2/NEBL/TBX3/JAG1/AGT/SGCB/TBX18/LMNA/SORBS2/BMPR1A/FOXP1/SMAD4/NOTCH1/PDLIM5	18
BP	GO:0007266	Rho protein signal transduction	24/1397	140/18903	8.90991e-05	0.00268103	0.00218408	ARHGAP29/PDGFRB/COL1A2/DLC1/ARHGAP42/EPS8/RHOJ/CDC42EP5/CDC42EP4/KANK2/ARHGEF12/ARHGEF25/ITGB1/GPR4/ROCK2/CDC42EP1/ARHGAP6/STARD8/STARD13/ABL1/BCL6/CDC42/ARHGAP1/RHOA	24
BP	GO:0085029	extracellular matrix assembly	12/1397	46/18903	9.28667e-05	0.00277961	0.00226439	LAMB2/PHLDB2/COL1A2/NTN4/FKBP10/AGT/DAG1/EFEMP2/PHLDB1/EMILIN1/LTBP3/NOTCH1	12
BP	GO:1902905	positive regulation of supramolecular fiber organization	28/1397	176/18903	9.44085e-05	0.00281089	0.00228986	SEMA5A/MAP1B/CTTN/FERMT2/CDC42EP5/NCKAP1/CDC42EP4/TPM1/EFEMP2/ROCK2/SYNPO2/CDC42EP1/DSTN/LMOD1/SORBS3/APP/PFN2/ITGB1BP1/RHOC/CDKN1B/CFL2/WASL/ARL2/ABL1/CDC42/GSN/ABI2/RHOA	28
BP	GO:0050818	regulation of coagulation	16/1397	75/18903	9.60848e-05	0.00284582	0.00231832	F3/TFPI/CAV1/PRKG1/CD9/C1QTNF1/TBXA2R/TSPAN8/SERPING1/THBS1/ANO6/PRDX2/EMILIN1/PROS1/ANXA2/VKORC1	16
BP	GO:0061326	renal tubule development	19/1397	99/18903	0.000101666	0.00299545	0.00244021	WNT6/FOXD1/COL4A1/SIX1/JAG1/PBX1/AGT/YAP1/HEYL/FGF1/PTCH1/HES1/WWTR1/ILK/BCL2/PKD1/SMAD4/ACAT1/NOTCH1	19
BP	GO:0008064	regulation of actin polymerization or depolymerization	26/1397	159/18903	0.000104301	0.00305714	0.00249047	SPTBN1/SEMA5A/DAAM2/CTTN/ESAM/EPS8/KANK3/CDC42EP5/NCKAP1/CDC42EP4/SVIL/LIMA1/ARPC1A/CDC42EP1/DSTN/LMOD1/PLEKHH2/PFN2/CFL2/ADD3/ADD1/PIK3CA/GSN/PLEKHG2/TMOD3/RHOA	26
BP	GO:0010959	regulation of metal ion transport	53/1397	423/18903	0.00010971	0.00319913	0.00260614	ATP1A2/RGS4/SLC30A10/KCNE4/MYLK/TRPC3/PDGFRB/GPER1/CAV1/DMD/TRPC6/FXYD6/CACNA1C/ABCC9/TESC/ATP1B2/REM1/HRC/ACTN4/FLNA/UTRN/CACNA2D1/CD63/FXYD1/AGT/STOM/HSPA2/STK39/ITGB1/CALM2/ANO6/AHNAK/HES1/VAMP2/FHL1/TRPC1/FYN/LGALS3/PDE4D/SESTD1/RRAD/TMEM38B/C4orf3/PSEN2/SLC9A1/CAMK2G/TMBIM6/BCL2/ABL1/GSTO1/SRI/ISCU/RHOA	53
BP	GO:0045862	positive regulation of proteolysis	48/1397	372/18903	0.000112286	0.00325745	0.00265365	F3/TRIB2/FN1/COL4A3/PCOLCE2/SH3D19/GPER1/CAV1/DLC1/UACA/NUPR1/FBLN1/PCOLCE/PTK2/RNF180/PTEN/AXIN2/MYH9/DAB2IP/NDUFA13/ROCK2/HIP1/SH3RF1/FYN/APP/TMTC3/FAM162A/CSNK1E/SUMO2/USP13/BBS7/BAD/PSME1/ANXA2/RBX1/PDCD5/AURKAIP1/FIS1/RPS27L/IFT57/GSN/DDRGK1/PSMC3/STUB1/ASPH/PDCD6/PSMC5/RHOA	48
BP	GO:0086065	cell communication involved in cardiac conduction	14/1397	61/18903	0.000113184	0.00325831	0.00265435	ATP1A2/CAV1/CACNA1C/ATP1B2/GJC1/HRC/HCN2/FLNA/CACNA2D1/CALM2/TBX18/PDE4D/JUP/SRI	14
BP	GO:0086003	cardiac muscle cell contraction	16/1397	76/18903	0.000113468	0.00325831	0.00265435	ATP1A2/KCNE4/CAV1/CACNA1C/KCNJ8/ABCC9/GJC1/FLNA/CACNA2D1/PDE4D/SLC9A1/JUP/PIK3CA/SRI/GSN/ATP2A2	16
BP	GO:0048638	regulation of developmental growth	44/1397	332/18903	0.000115761	0.00330736	0.00269431	AGRN/RGS4/MAP2/FN1/SEMA5A/MAP1B/FOXC1/HEY2/IGF2/CTTN/SIX1/TBX2/FOXS1/FOXC2/PTEN/NKX6-1/YAP1/PTPRS/HOPX/PTCH1/NKD1/APP/NPY1R/SGPL1/SEMA6D/CDKN1B/BMPR1A/LATS2/RYK/PPIB/RUFY3/SAV1/FOXP1/MACF1/BCL2/ABL1/SOD1/PIK3CA/WWC3/DPYSL2/RBPJ/STK3/TGFBR2/NOTCH1	44
BP	GO:0003198	epithelial to mesenchymal transition involved in endocardial cushion formation	7/1397	17/18903	0.000119122	0.00334015	0.00272102	HEY2/HEYL/MSX1/SMAD4/RBPJ/TGFBR2/NOTCH1	7
BP	GO:0051895	negative regulation of focal adhesion assembly	7/1397	17/18903	0.000119122	0.00334015	0.00272102	PHLDB2/DLC1/PTEN/THBS1/ARHGAP6/ITGB1BP1/BCAS3	7
BP	GO:0150118	negative regulation of cell-substrate junction organization	7/1397	17/18903	0.000119122	0.00334015	0.00272102	PHLDB2/DLC1/PTEN/THBS1/ARHGAP6/ITGB1BP1/BCAS3	7
BP	GO:0060317	cardiac epithelial to mesenchymal transition	10/1397	34/18903	0.00011927	0.00334015	0.00272102	HEY2/TBX3/EMP2/JAG1/HEYL/MSX1/SMAD4/RBPJ/TGFBR2/NOTCH1	10
BP	GO:1904062	regulation of cation transmembrane transport	50/1397	394/18903	0.000123883	0.00345226	0.00281235	ATP1A2/RGS4/KCNE4/TRPC3/EDNRA/GPER1/CAV1/DMD/FXYD6/CACNA1C/ABCC9/TESC/ATP1B2/REM1/HRC/HCN2/ACTN4/FLNA/UTRN/CACNA2D1/CD63/FXYD1/AGT/STOM/HSPA2/STK39/ITGB1/CALM2/ANO6/AHNAK/VAMP2/FHL1/TRPC1/FYN/APP/PARK7/PDE4D/SESTD1/RRAD/TMEM38B/C4orf3/PSEN2/SLC9A1/TMBIM6/BCL2/ABL1/COX17/GSTO1/SRI/ISCU	50
BP	GO:0048659	smooth muscle cell proliferation	28/1397	179/18903	0.000127255	0.00352534	0.00287188	MIR145/PDGFRB/GPER1/PRKG1/NOTCH3/IGFBP5/PTEN/TPM1/AGT/EFEMP2/THBS1/RBPMS2/DDR2/NDRG2/CDKN1B/BMPR1A/ADAMTS1/LDLRAP1/FOXP1/MNAT1/XRCC5/HDAC1/PIK3CA/NF1/PRKDC/XRCC6/TGFBR2/RHOA	28
BP	GO:0007043	cell-cell junction assembly	25/1397	152/18903	0.000127752	0.00352534	0.00287188	GJA4/CDH6/CAV1/PARD3/ESAM/CD9/TJP1/CDH11/GJC1/VCL/AGT/HOPX/ROCK2/MPDZ/JAM3/EPHA2/MYO1C/RHOC/ARL2/ACTG1/ACTB/JUP/CTNNA1/TLN1/RHOA	25
BP	GO:1905477	positive regulation of protein localization to membrane	19/1397	101/18903	0.000134226	0.00368601	0.00300277	SPTBN1/GPER1/EGFR/KCNB1/STOM/ITGB1/LRP1/PTPN9/ACSL3/FYN/CNPY4/EPHA2/LGALS3/MYO1C/ITGB1BP1/CD81/PDCD5/FIS1/RER1	19
BP	GO:0090303	positive regulation of wound healing	14/1397	62/18903	0.000136371	0.00370586	0.00301894	F3/MYLK/SMOC2/FERMT2/FOXC2/PTK2/TBXA2R/ITGB1/THBS1/ANO6/DDR2/PRDX2/EMILIN1/ACTG1	14
BP	GO:0045185	maintenance of protein location	18/1397	93/18903	0.000137008	0.00370586	0.00301894	CAV1/DZIP1/FLNA/SYNE1/NBL1/LTBP1/SUN1/SKP1/PARK7/KDELR1/ARL2/TXN/GPAA1/PKD1/RER1/SRI/GSN/CHCHD10	18
BP	GO:0055017	cardiac muscle tissue growth	18/1397	93/18903	0.000137008	0.00370586	0.00301894	RGS4/FOXC1/HEY2/TBX2/FOXC2/PTEN/AGT/YAP1/PRKAR1A/SORBS2/BMPR1A/SAV1/FOXP1/ABL1/RBPJ/TGFBR2/NOTCH1/PDLIM5	18
BP	GO:0051896	regulation of protein kinase B signaling	29/1397	189/18903	0.000137569	0.00370586	0.00301894	F3/SEMA5A/MIR145/GPER1/EGFR/IGF2/FERMT2/C1QTNF1/IGFBP5/PTK2/PTEN/F10/RRAS/ANGPT1/DAG1/ITGB1/THBS1/HIP1/MAGI2/EPHA2/PARK7/SESN3/ITGB1BP1/TXN/AXL/PIK3CA/PHLPP1/STK3/PDCD6	29
BP	GO:0043200	response to amino acid	21/1397	118/18903	0.00013948	0.00372854	0.00303742	COL5A2/EGFR/COL1A2/COL4A1/SIX1/COL6A1/KCNB1/NQO1/FYN/ZEB1/SESN3/CDKN1B/BAD/LAMTOR5/RRAGA/TMBIM6/GCLM/PIK3CA/UFL1/CAPN2/RHOA	21
BP	GO:0061564	axon development	59/1397	490/18903	0.00013973	0.00372854	0.00303742	ECE1/NFASC/MAP2/FN1/CNTN4/LAMB2/EDNRA/SEMA5A/MAP1B/FOXD1/LAMA2/PTN/PARD3/CTTN/NDN/CDH11/BSG/NOTCH3/VCL/KALRN/PTK2/PTEN/FLNA/NKX6-1/ARHGEF25/KIF5C/C12orf57/ETV1/PTPRS/DAG1/ITGB1/B3GNT2/S100A6/PTCH1/NEXN/TNFRSF21/FYN/APP/EPHA2/FEZ1/SEMA6D/RAPH1/ACTB/RYK/MAP1A/RUFY3/MACF1/CTNNA1/BCL2/METRN/APLP2/UNC5B/ABL1/DPYSL2/USP33/SMAD4/NPTN/STK24/NOTCH1	59
BP	GO:0050804	modulation of chemical synaptic transmission	55/1397	448/18903	0.000140704	0.00373691	0.00304424	ATP1A2/RGS4/CNTN4/SLC6A1/CPLX1/MAP1B/SLC12A2/LAMA2/GPER1/GRM3/GRM8/PTN/LZTS1/CA2/SNCG/NFATC4/CDH11/ADORA2B/GABBR1/KCNB1/PTEN/CD38/AGT/SLC7A11/PLCL1/ITGB1/VAMP2/FYN/CLSTN1/APP/PTPRA/PFN2/EIF4EBP2/ATAD1/PACSIN2/AKAP12/SLC38A2/SYP/SYNGR1/ERC1/MAP1A/GIPC1/MTMR2/PREPL/PNKD/KMT2A/ABL1/ARF1/SYT11/NPTN/NF1/ATP2A2/RNF167/PSMC5/PAIP2	55
BP	GO:0030832	regulation of actin filament length	26/1397	162/18903	0.00014278	0.00377432	0.00307471	SPTBN1/SEMA5A/DAAM2/CTTN/ESAM/EPS8/KANK3/CDC42EP5/NCKAP1/CDC42EP4/SVIL/LIMA1/ARPC1A/CDC42EP1/DSTN/LMOD1/PLEKHH2/PFN2/CFL2/ADD3/ADD1/PIK3CA/GSN/PLEKHG2/TMOD3/RHOA	26
BP	GO:0007409	axonogenesis	54/1397	438/18903	0.000144548	0.00377645	0.00307645	ECE1/NFASC/MAP2/FN1/CNTN4/LAMB2/EDNRA/SEMA5A/MAP1B/FOXD1/LAMA2/PARD3/CTTN/NDN/CDH11/BSG/NOTCH3/VCL/KALRN/PTK2/PTEN/NKX6-1/ARHGEF25/KIF5C/C12orf57/ETV1/PTPRS/DAG1/ITGB1/B3GNT2/S100A6/PTCH1/NEXN/FYN/APP/EPHA2/FEZ1/SEMA6D/RAPH1/ACTB/RYK/MAP1A/RUFY3/MACF1/BCL2/METRN/APLP2/UNC5B/ABL1/DPYSL2/USP33/SMAD4/NPTN/NOTCH1	54
BP	GO:0003197	endocardial cushion development	12/1397	48/18903	0.000144863	0.00377645	0.00307645	HEY2/TBX3/TBX2/JAG1/HEYL/MSX1/BMPR1A/CRELD1/SMAD4/RBPJ/TGFBR2/NOTCH1	12
BP	GO:0035850	epithelial cell differentiation involved in kidney development	12/1397	48/18903	0.000144863	0.00377645	0.00307645	LAMB2/EDNRA/FOXC2/EDNRB/JAG1/YAP1/GPR4/MAGI2/ACTA2/WWTR1/IQGAP1/NOTCH1	12
BP	GO:0007173	epidermal growth factor receptor signaling pathway	20/1397	110/18903	0.000147331	0.00382316	0.0031145	SLC30A10/ITGA1/GPER1/EGFR/PLCE1/AFAP1L2/PTK2/AGT/DAB2IP/HIP1/WDR54/IFI6/IQGAP1/PTPN12/VPS25/RNF115/ABL1/PIK3CA/MVB12A/CBLB	20
BP	GO:0099177	regulation of trans-synaptic signaling	55/1397	449/18903	0.000149119	0.0038519	0.00313791	ATP1A2/RGS4/CNTN4/SLC6A1/CPLX1/MAP1B/SLC12A2/LAMA2/GPER1/GRM3/GRM8/PTN/LZTS1/CA2/SNCG/NFATC4/CDH11/ADORA2B/GABBR1/KCNB1/PTEN/CD38/AGT/SLC7A11/PLCL1/ITGB1/VAMP2/FYN/CLSTN1/APP/PTPRA/PFN2/EIF4EBP2/ATAD1/PACSIN2/AKAP12/SLC38A2/SYP/SYNGR1/ERC1/MAP1A/GIPC1/MTMR2/PREPL/PNKD/KMT2A/ABL1/ARF1/SYT11/NPTN/NF1/ATP2A2/RNF167/PSMC5/PAIP2	55
BP	GO:0090075	relaxation of muscle	10/1397	35/18903	0.000156001	0.0040038	0.00326166	ATP1A2/PDE5A/PRKG1/ADORA2B/HRC/PDE4D/SOD1/PIK3CA/SRI/GSN	10
BP	GO:0046058	cAMP metabolic process	8/1397	23/18903	0.000156415	0.0040038	0.00326166	PDE8B/PDE7B/ADCY6/ADCY9/EPHA2/ADCY3/PDE4D/PDE8A	8
BP	GO:0032535	regulation of cellular component size	47/1397	367/18903	0.000157482	0.00401296	0.00326912	SPTBN1/MAP2/FN1/SEMA5A/MAP1B/SLC12A2/DAAM2/CTTN/ESAM/EPS8/KANK3/CDC42EP5/SLC12A7/NCKAP1/CDC42EP4/PTEN/NKX6-1/SVIL/LIMA1/PTPRS/ARPC1A/ANO6/CDC42EP1/DSTN/LMOD1/BLOC1S1/PLEKHH2/PFN2/AP2M1/SEMA6D/SLC12A4/CFL2/ADD3/HP1BP3/ADD1/LAMTOR5/RYK/RUFY3/MACF1/AKT3/ABL1/PIK3CA/DPYSL2/GSN/PLEKHG2/TMOD3/RHOA	47
BP	GO:0008154	actin polymerization or depolymerization	30/1397	200/18903	0.000160952	0.00408299	0.00332617	SPTBN1/SEMA5A/DAAM2/CTTN/ESAM/EPS8/KANK3/CDC42EP5/NCKAP1/CDC42EP4/SVIL/LIMA1/ARPC1A/CDC42EP1/DSTN/LMOD1/PLEKHH2/ARHGAP6/PFN2/CFL2/ADD3/WASL/ADD1/ABL1/PIK3CA/GSN/PLEKHG2/TMOD3/ABI2/RHOA	30
BP	GO:0016049	cell growth	59/1397	493/18903	0.000164845	0.00415618	0.00338579	RGS4/FRZB/MAP2/FN1/LAMB2/IGFBP7/EDNRA/SEMA5A/MAP1B/EGFR/PLCE1/TEAD1/CTTN/RERG/MEG3/NDN/GNG4/VCL/IGFBP5/NKX6-1/CD38/AGT/YAP1/PTPRS/IGFBP4/ITGB1/NDUFA13/RASGRP2/MSX1/FHL1/CLSTN1/APP/JADE1/SEMA6D/IQGAP1/CDKN1B/SORBS2/RAPH1/EXTL3/RYK/RUFY3/DCBLD2/SLC9A1/FOXP1/MACF1/RBBP7/BCL2/ABL1/CCDC85B/CDKN2D/DPYSL2/SMAD4/BCL6/CDC42/NDUFS3/PPP2R1A/TGFBR2/RHOA/PDLIM5	59
BP	GO:0072012	glomerulus vasculature development	9/1397	29/18903	0.000165307	0.00415618	0.00338579	EDNRA/PDGFRB/NOTCH3/FOXC2/ANGPT1/GPR4/HES1/ACTA2/NOTCH1	9
BP	GO:1903829	positive regulation of protein localization	55/1397	451/18903	0.000167335	0.00417261	0.00339917	PRKAA2/SPTBN1/TTN/ZIC1/GPER1/EGFR/FERMT2/DZIP1/KCNB1/WLS/FLNA/NKX6-1/CD38/YAP1/STOM/ITGB1/MYH10/GNAI1/LRP1/ROCK2/PTPN9/VAMP2/LEPROT/ACSL3/FYN/WWTR1/CNPY4/PFKM/EPHA2/LGALS3/PARK7/MYO1C/ITGB1BP1/UBL5/CAMK1/BAD/LAMTOR5/MAP1A/RUFY3/JUP/CD81/PDCD5/FIS1/RER1/VPS28/BCAS3/SYT11/PSMD9/CCT7/NPTN/SRI/DDRGK1/PDCD10/OAZ2/PRKAA1	55
BP	GO:0034446	substrate adhesion-dependent cell spreading	20/1397	111/18903	0.000167435	0.00417261	0.00339917	LAMC1/FN1/LAMB2/LAMC3/PARVA/NTN4/FERMT2/FBLN1/PTK2/ACTN4/RADIL/FLNA/DOCK1/ITGB1BP1/ILK/AXL/ARHGEF7/ABL1/CDC42/RHOA	20
BP	GO:0010718	positive regulation of epithelial to mesenchymal transition	13/1397	56/18903	0.000174386	0.00430413	0.00350631	FOXC1/FERMT2/EMP2/TGFB1I1/PTK2/LEF1/JAG1/AXIN2/WWTR1/SMAD4/BCL9L/TGFBR2/NOTCH1	13
BP	GO:2001236	regulation of extrinsic apoptotic signaling pathway	25/1397	155/18903	0.000175476	0.00430413	0.00350631	GPER1/CAV1/CTTN/TIMP3/PTEN/AGT/YAP1/ITM2C/THBS1/GSTP1/SH3RF1/IFI6/LMNA/PRDX2/LGALS3/PARK7/TNFSF12/PPP2R1B/CTNNA1/BCL2/UNC5B/GCLM/NF1/PPP2R1A/STK3	25
BP	GO:0048144	fibroblast proliferation	19/1397	103/18903	0.000175627	0.00430413	0.00350631	FN1/PDGFRB/EGFR/CAV1/CD248/PAWR/DACH1/NUPR1/AGT/DAB2IP/S100A6/DDR2/GSTP1/NDUFS4/KMT2A/MORF4L1/MIF/ABL1/NF1	19
BP	GO:0009214	cyclic nucleotide catabolic process	6/1397	13/18903	0.000175756	0.00430413	0.00350631	PDE5A/PDE8B/PDE7B/PDE2A/PDE4D/PDE8A	6
BP	GO:0070527	platelet aggregation	15/1397	71/18903	0.000176518	0.00430415	0.00350633	PEAR1/FN1/PRKG1/CD9/C1QTNF1/MYL9/VCL/FLNA/SLC7A11/MYH9/MYL12A/ACTG1/ILK/ACTB/TLN1	15
BP	GO:0045926	negative regulation of growth	35/1397	249/18903	0.000179544	0.00435915	0.00355114	RGS4/FRZB/MAP2/SEMA5A/RERG/MEG3/GNG4/IGFBP5/PTEN/AGT/PTPRS/NDUFA13/PTCH1/MSX1/FHL1/NKD1/JADE1/SEMA6D/CDKN1B/MT1E/RYK/DCBLD2/SAV1/FOXP1/RBBP7/BCL2/CCDC85B/CDKN2D/WWC3/SMAD4/BCL6/NDUFS3/PPP2R1A/STK3/TGFBR2	35
BP	GO:2000811	negative regulation of anoikis	7/1397	18/18903	0.00018252	0.00441246	0.00359456	CAV1/PTK2/TLE1/ITGB1/BCL2/PIK3CA/NOTCH1	7
BP	GO:0048545	response to steroid hormone	44/1397	339/18903	0.000186354	0.00448597	0.00365445	ATP1A2/TFPI/IGFBP2/IGFBP7/GPER1/CAV1/PTGDS/SSTR2/CYP7B1/KANK2/PAM/CD38/TXNIP/YAP1/AXIN2/HEYL/LBH/RBFOX2/STK39/THBS1/NR1H3/FBXO32/KLF9/PARK7/UFSP2/PGRMC2/BAD/ABHD2/DDX17/FOXP1/PPARGC1B/RBBP7/BCL2/PMEPA1/GPI/HDAC1/PIK3CA/UFL1/DDRGK1/NCOA2/TGFBR2/NOTCH1/NR3C1/RHOA	44
BP	GO:0090092	regulation of transmembrane receptor protein serine/threonine kinase signaling pathway	39/1397	290/18903	0.000203541	0.00487896	0.0039746	FSTL1/FOXD1/CAV2/CAV1/RBPMS/DKK3/TGFB1I1/VASN/CRIM1/THBS1/RBPMS2/MSX1/LRP1/HES1/MAGI2/NBL1/ZEB1/PELO/LTBP1/EMILIN1/CDKN1C/BMPR1A/ILK/C20orf27/LATS2/GIPC1/RBBP7/PIN1/PMEPA1/ABL1/GLG1/HDAC1/SMAD4/RBPJ/RBBP4/BCL9L/STUB1/TGFBR2/NOTCH1	39
BP	GO:0072080	nephron tubule development	18/1397	96/18903	0.000208316	0.00495679	0.004038	WNT6/FOXD1/SIX1/JAG1/PBX1/AGT/YAP1/HEYL/FGF1/PTCH1/HES1/WWTR1/ILK/BCL2/PKD1/SMAD4/ACAT1/NOTCH1	18
BP	GO:0042542	response to hydrogen peroxide	22/1397	130/18903	0.000208541	0.00495679	0.004038	PDGFRB/PAWR/NQO1/TXNIP/DDR2/MAP1LC3A/FYN/PARK7/BAD/TXN/CAT/PDE8A/FOXP1/AXL/BCL2/ABL1/PPP2CB/SOD1/STK24/PDCD10/CAPN2/PRKAA1	22
BP	GO:0006749	glutathione metabolic process	13/1397	57/18903	0.000210807	0.0049897	0.00406481	GGT5/GGT1/SLC7A11/GSTP1/GLO1/GSTA4/PARK7/GSTK1/GSTT1/GCLM/SOD1/GSTO1/HAGH	13
BP	GO:1901879	regulation of protein depolymerization	17/1397	88/18903	0.000213114	0.00501256	0.00408343	SPTBN1/SEMA5A/MAP1B/EPS8/SVIL/LIMA1/DSTN/LMOD1/PLEKHH2/CFL2/ADD3/ADD1/MAP1A/PIK3CA/GSN/TMOD3/ASPH	17
BP	GO:0007009	plasma membrane organization	26/1397	166/18903	0.000213546	0.00501256	0.00408343	SPTBN1/PLSCR4/CAV2/CAV1/ANO3/CD9/EMP2/COLEC12/EHD2/A4GALT/PTEN/ANXA6/MYH9/ANO6/AHNAK/PACSIN2/CHMP5/WASL/ASAP1/CHMP2A/ANXA2/STX2/SOD1/SYT11/GSN/ATP2A2	26
BP	GO:0048754	branching morphogenesis of an epithelial tube	25/1397	157/18903	0.000215506	0.00503768	0.0041039	WNT6/EDNRA/FOXD1/TBX3/COL4A1/NFATC4/SIX1/TBX2/FOXC2/LEF1/PBX1/AGT/YAP1/FGF1/DAG1/PTCH1/CLIC4/EPHA2/ILK/BCL2/PKD1/ABL1/SMAD4/TGFBR2/NOTCH1	25
BP	GO:0009154	purine ribonucleotide catabolic process	11/1397	43/18903	0.000218591	0.0050679	0.00412851	PDE5A/PDE8B/PDE7B/PDE2A/SUCLG1/PDE4D/HINT1/PDE8A/NUDT4/SUCLA2/ACAT1	11
BP	GO:0048713	regulation of oligodendrocyte differentiation	11/1397	43/18903	0.000218591	0.0050679	0.00412851	DAAM2/PTN/IL34/TMEM98/NKX6-1/DAG1/HES1/TNFRSF21/HDAC1/NF1/NOTCH1	11
BP	GO:0002064	epithelial cell development	31/1397	213/18903	0.000219904	0.00507755	0.00413638	EPAS1/FRZB/LAMB2/EDNRA/S1PR3/FRMD6/TJP1/VCL/PDE2A/FOXC2/EDNRB/JAG1/VIM/NKX6-1/YAP1/GPR4/ROCK2/CLIC4/MAGI2/ACTA2/FAT1/EPHA2/PDE4D/IQGAP1/ADD1/BAD/HSD17B4/YIPF6/SIDT2/ABI2/NOTCH1	31
BP	GO:1901888	regulation of cell junction assembly	30/1397	204/18903	0.00022945	0.00527641	0.00429838	AGRN/PHLDB2/CAV1/DLC1/FERMT2/SIX1/TJP1/VCL/PTK2/FARP1/PTEN/AGT/THBS1/HOPX/ROCK2/CLSTN1/APP/ARHGAP6/PTPRA/EPHA2/MYO1C/ITGB1BP1/ACTG1/SLC9A1/MACF1/TLN1/ABL1/BCAS3/RHOA/PDLIM5	30
BP	GO:0007265	Ras protein signal transduction	45/1397	353/18903	0.000238644	0.00546562	0.00445252	ARHGAP29/RAPGEF4/PDGFRB/RAPGEF5/COL1A2/DLC1/PLCE1/ARHGAP42/RERG/EPS8/KITLG/RHOJ/SYDE1/CDC42EP5/CYTH3/NCKAP1/CDC42EP4/KANK2/ARHGEF12/RRAS/ARHGEF25/ITGB1/DAB2IP/GPR4/RASGRP2/ROCK2/CADM4/CDC42EP1/ARHGAP6/PARK7/IQSEC1/FARP2/STARD8/STARD13/ABL1/PPP2CB/BCL6/NF1/CDC42/ARHGAP17/RFXANK/ABI2/ARHGAP1/NOTCH1/RHOA	45
BP	GO:0048864	stem cell development	17/1397	89/18903	0.00024558	0.00560179	0.00456344	FN1/EDNRA/SEMA5A/FOXC1/KITLG/FOXC2/EDNRB/JAG1/RADIL/ANXA6/HES1/SEMA6D/BMPR1A/BCL2/CDC42/FAM172A/PDCD6	17
BP	GO:0014855	striated muscle cell proliferation	16/1397	81/18903	0.000248002	0.00563432	0.00458994	FOXC1/HEY2/CAV2/SIX1/TBX2/FOXC2/PTEN/YAP1/ANGPT1/PRKAR1A/BMPR1A/SAV1/ABL1/RBPJ/TGFBR2/NOTCH1	16
BP	GO:0003161	cardiac conduction system development	10/1397	37/18903	0.000258401	0.00580069	0.00472548	HEY2/TBX3/HOPX/MSX1/TBX18/BMPR1A/SMAD4/SMAD5/CDC42/NOTCH1	10
BP	GO:0044319	wound healing, spreading of cells	10/1397	37/18903	0.000258401	0.00580069	0.00472548	PHLDB2/AJUBA/FERMT2/CD151/PTEN/FLNA/ITGB1/RHOC/PDCD10/RHOA	10
BP	GO:0090505	epiboly involved in wound healing	10/1397	37/18903	0.000258401	0.00580069	0.00472548	PHLDB2/AJUBA/FERMT2/CD151/PTEN/FLNA/ITGB1/RHOC/PDCD10/RHOA	10
BP	GO:0010970	transport along microtubule	26/1397	168/18903	0.000259428	0.00580072	0.00472551	MAP2/MAP1B/SYNE2/DYNC1I1/KIF5C/ARL3/DST/BLOC1S1/APP/SUN1/DYNC2H1/DYNLL1/FEZ1/ACTR10/KIF13A/DYNC1I2/MAP1A/KIFAP3/TTC21B/HSPB11/SOD1/DYNC1H1/IFT57/KIF3A/AP3S1/CDC42	26
BP	GO:0052547	regulation of peptidase activity	55/1397	459/18903	0.000262166	0.00583887	0.00475658	F3/ECM1/TFPI/FN1/COL4A3/PCOLCE2/GPER1/CAV1/DLC1/ITIH5/UACA/TIMP3/FBLN1/PCOLCE/TIMP1/SERPINI1/SERPING1/AGT/CRIM1/THBS1/NDUFA13/LRP1/ROCK2/PEBP1/HIP1/SH3RF1/FYN/IFI6/APP/FAM162A/PARK7/GAPDH/PROS1/BAD/LAMTOR5/PSME1/ANXA2/APLP2/PDCD5/PRDX5/GPI/HDAC1/FIS1/CAST/RPS27L/IFT57/CDKN2D/SERPINB6/GSN/DDRGK1/ASPH/PDCD6/PSMF1/MGMT/RHOA	55
BP	GO:0030010	establishment of cell polarity	24/1397	150/18903	0.00026529	0.0058623	0.00477566	AMOTL2/MAP1B/PARD3/CYTH3/PLEKHG3/PTK2/ITGB1/MYH9/ROCK2/HES1/JAM3/FAT1/FEZ1/MYO9A/RUFY3/MAP4/WEE1/PKD1/ABL1/BCAS3/CDC42/GSN/DYNLT1/RHOA	24
BP	GO:0034614	cellular response to reactive oxygen species	24/1397	150/18903	0.00026529	0.0058623	0.00477566	PTPRK/EGFR/PAWR/TPM1/SOD3/NQO1/DDR2/MAP1LC3A/FYN/PRDX2/PARK7/ERCC6L2/TXN/CAT/PDE8A/FOXP1/PPARGC1B/AXL/PRDX5/ABL1/SOD1/PDCD10/ROMO1/PRKAA1	24
BP	GO:0035329	hippo signaling	11/1397	44/18903	0.000272192	0.00597442	0.00486701	AMOTL2/TEAD1/AJUBA/WTIP/YAP1/MOB3B/WWTR1/LATS2/SAV1/WWC3/STK3	11
BP	GO:0050673	epithelial cell proliferation	57/1397	481/18903	0.000272477	0.00597442	0.00486701	F3/ECM1/LAMC1/COL4A3/SEMA5A/SPARC/PTPRK/EGFR/CAV2/CAV1/PTN/IGF2/DACH1/SIX1/NR2F2/NUPR1/TBX2/CYP7B1/PGF/IGFBP5/EDNRB/JAG1/PTEN/NKX6-1/YAP1/FGF1/IGFBP4/DAB2IP/VSTM4/THBS1/PTCH1/HES1/MCC/KLF9/ZEB1/EPHA2/ITGB1BP1/CDKN1B/WDR13/CDKN1C/BMPR1A/EGFL7/BAD/SAV1/TNFSF12/AKT3/IFT57/NF1/PRKDC/CDC42/AIMP1/RBPJ/SIDT2/PDCD10/STK3/PDCD6/NOTCH1	57
BP	GO:0010812	negative regulation of cell-substrate adhesion	14/1397	66/18903	0.000274941	0.00600518	0.00489206	PHLDB2/DLC1/FBLN1/ACTN4/JAG1/PTEN/THBS1/ARHGAP6/ITGB1BP1/BCAS3/BCL6/NF1/NOTCH1/RHOA	14
BP	GO:2000736	regulation of stem cell differentiation	16/1397	82/18903	0.00028731	0.0061777	0.00503261	FOXC1/PTN/TBX3/JAG1/YAP1/LBH/HES1/RBBP7/LTBP3/N4BP2L2/ABL1/HDAC1/PRKDC/OCIAD1/RBBP4/NOTCH1	16
BP	GO:0006122	mitochondrial electron transport, ubiquinol to cytochrome c	6/1397	14/18903	0.000288359	0.0061777	0.00503261	CYC1/UQCRQ/UQCRC1/UQCR10/UQCRC2/UQCRH	6
BP	GO:0048715	negative regulation of oligodendrocyte differentiation	6/1397	14/18903	0.000288359	0.0061777	0.00503261	DAAM2/TMEM98/NKX6-1/HES1/NF1/NOTCH1	6
BP	GO:1902600	proton transmembrane transport	25/1397	160/18903	0.000290729	0.0061777	0.00503261	ATP1A2/TESC/COX4I2/COX7A1/ACTN4/COX5B/COX6A1/COX8A/COX7B/SLC25A4/CYC1/PARK7/NDUFS7/UQCRC1/ATP6V1G1/CYB5A/UQCR10/ATP6AP2/SLC9A1/COX6B1/COX17/HVCN1/TMCO3/ATP6V1E1/UQCRH	25
BP	GO:0010880	regulation of release of sequestered calcium ion into cytosol by sarcoplasmic reticulum	9/1397	31/18903	0.000290843	0.0061777	0.00503261	ATP1A2/DMD/CACNA1C/HRC/CALM2/PDE4D/TMEM38B/GSTO1/SRI	9
BP	GO:0061437	renal system vasculature development	9/1397	31/18903	0.000290843	0.0061777	0.00503261	EDNRA/PDGFRB/NOTCH3/FOXC2/ANGPT1/GPR4/HES1/ACTA2/NOTCH1	9
BP	GO:0061440	kidney vasculature development	9/1397	31/18903	0.000290843	0.0061777	0.00503261	EDNRA/PDGFRB/NOTCH3/FOXC2/ANGPT1/GPR4/HES1/ACTA2/NOTCH1	9
BP	GO:0002027	regulation of heart rate	19/1397	107/18903	0.000293122	0.0061777	0.00503261	RGS4/EPAS1/KCNE4/EDNRA/HEY2/CAV1/DMD/CACNA1C/HRC/HCN2/EDNRB/TPM1/CACNA2D1/AGT/CALM2/PDE4D/JUP/SRI/ATP2A2	19
BP	GO:0010717	regulation of epithelial to mesenchymal transition	19/1397	107/18903	0.000293122	0.0061777	0.00503261	PHLDB2/FOXC1/FERMT2/EMP2/TGFB1I1/PTK2/LEF1/JAG1/PTEN/VASN/AXIN2/DAG1/DAB2IP/WWTR1/PHLDB1/SMAD4/BCL9L/TGFBR2/NOTCH1	19
BP	GO:0071456	cellular response to hypoxia	24/1397	151/18903	0.00029376	0.0061777	0.00503261	EPAS1/MIR145/AJUBA/SLC2A4/PTEN/VASN/DDR2/ROCK2/RORA/MALAT1/LMNA/CHCHD2/FAM162A/SDHD/CDKN1B/HP1BP3/BAD/SLC9A1/TMBIM6/BCL2/RBPJ/STUB1/NOTCH1/PRKAA1	24
BP	GO:0051604	protein maturation	43/1397	336/18903	0.000298412	0.00625228	0.00509336	ECE1/F3/FN1/ENPEP/CPE/C1R/TESC/GGT1/FBLN1/TMEM98/FLNA/GLRX5/CPM/MYH9/THBS1/PTCH1/DYNC2H1/PRDX4/SPCS2/NDUFAB1/PSEN2/BAD/BMP1/ATP6AP2/BOLA3/GCSH/SPCS1/RPS6KA2/ANXA2/ISCA1/CLN5/GLG1/NFU1/CAST/CISD3/GSN/STOML2/STUB1/LMF2/ASPH/MBTPS1/CAPN2/RASAL2	43
BP	GO:0031579	membrane raft organization	8/1397	25/18903	0.000302005	0.00630421	0.00513566	CAV2/CAV1/EMP2/COLEC12/RFTN1/PACSIN2/ANXA2/GSN	8
BP	GO:0045785	positive regulation of cell adhesion	57/1397	484/18903	0.000319438	0.00664361	0.00541215	LAMC1/NID1/FN1/IGFBP2/LAMB2/EDIL3/LAMA2/CAV1/SMARCD3/ECM2/IGF2/KITLG/FERMT2/TJP1/EMP2/LGALS1/FOXC2/CYTH3/CCDC80/LEF1/FLNA/UTRN/TPM1/RRAS/CHST2/ETS1/ANGPT1/DAG1/DOCK1/EFEMP2/HES1/FYN/JAK1/RSU1/ZBTB16/EMILIN1/ITGB1BP1/CD46/ARL2/BAD/ILK/ACTB/HSD17B12/KIFAP3/JUP/CD81/ARHGEF7/MAGI1/ABL1/PIK3CA/SMARCC2/BCL6/CDC42/PHF10/DENND6A/TGFBR2/RHOA	57
BP	GO:0003203	endocardial cushion morphogenesis	10/1397	38/18903	0.000327683	0.00676534	0.00551132	HEY2/TBX3/TBX2/HEYL/MSX1/BMPR1A/SMAD4/RBPJ/TGFBR2/NOTCH1	10
BP	GO:0090504	epiboly	10/1397	38/18903	0.000327683	0.00676534	0.00551132	PHLDB2/AJUBA/FERMT2/CD151/PTEN/FLNA/ITGB1/RHOC/PDCD10/RHOA	10
BP	GO:0014032	neural crest cell development	16/1397	83/18903	0.000331888	0.00680251	0.0055416	FN1/EDNRA/SEMA5A/FOXC1/KITLG/FOXC2/EDNRB/JAG1/RADIL/ANXA6/HES1/SEMA6D/BMPR1A/CDC42/FAM172A/PDCD6	16
BP	GO:0055013	cardiac muscle cell development	16/1397	83/18903	0.000331888	0.00680251	0.0055416	RGS4/FHL2/TTN/PDGFRB/HEY2/NEBL/TBX3/AGT/SGCB/TBX18/LMNA/SORBS2/BMPR1A/FOXP1/SMAD4/PDLIM5	16
BP	GO:0043491	protein kinase B signaling	31/1397	218/18903	0.00033336	0.00680527	0.00554385	F3/PEAR1/SEMA5A/MIR145/GPER1/EGFR/IGF2/FERMT2/C1QTNF1/IGFBP5/PTK2/PTEN/F10/RRAS/ANGPT1/DAG1/ITGB1/THBS1/HIP1/MAGI2/EPHA2/PARK7/SESN3/ITGB1BP1/TXN/ILK/AXL/PIK3CA/PHLPP1/STK3/PDCD6	31
BP	GO:0006575	cellular modified amino acid metabolic process	27/1397	180/18903	0.000334429	0.00680527	0.00554385	SLCO1C1/PRODH/GGT5/GGT1/SLC19A1/CPT1A/SLC16A2/PLOD2/CKMT2/SLC7A11/PCYOX1/MBOAT2/GSTP1/GLO1/GSTA4/PARK7/CPQ/ICMT/SERINC5/GSTK1/GSTT1/GCLM/SERINC3/ALDH7A1/SOD1/GSTO1/HAGH	27
BP	GO:0030835	negative regulation of actin filament depolymerization	11/1397	45/18903	0.000336461	0.00682208	0.00555754	SPTBN1/EPS8/SVIL/LIMA1/LMOD1/PLEKHH2/ADD3/ADD1/PIK3CA/GSN/TMOD3	11
BP	GO:0050878	regulation of body fluid levels	48/1397	390/18903	0.000343207	0.00693401	0.00564872	F3/PEAR1/TFPI/FN1/DGKB/CAV1/PRKG1/CD9/EMP2/C1QTNF1/MYL9/FBLN1/VCL/EDNRB/TBXA2R/TSPAN8/FLNA/ADRA2C/PAM/F10/SERPING1/ADCY6/PAPSS2/SLC7A11/CD59/STK39/MYH9/THBS1/ANO6/DGKH/NR1H3/MYL12A/PRDX2/EMILIN1/PROS1/ACTG1/ILK/ACTB/ANXA2/AXL/C1GALT1C1/TLN1/EXT2/GPI/VKORC1/PIK3CA/AK3/LMAN1	48
BP	GO:0003206	cardiac chamber morphogenesis	21/1397	126/18903	0.000356494	0.00717681	0.00584652	FHL2/EDNRA/CPE/FOXC1/HEY2/SMARCD3/PARVA/TBX3/TBX2/FOXC2/JAG1/TPM1/HEYL/HES1/BMPR1A/ADAMTS1/SAV1/SMAD4/RBPJ/TGFBR2/NOTCH1	21
BP	GO:0034599	cellular response to oxidative stress	38/1397	288/18903	0.000358171	0.007185	0.0058532	PRKAA2/EPAS1/EDNRA/PTPRK/EGFR/PAWR/PRODH/TPM1/SOD3/NQO1/SLC7A11/PLA2R1/DDR2/MAP1LC3A/FYN/CHCHD2/PRDX2/PARK7/ERCC6L2/TXN/NFE2L1/CAT/PDE8A/FOXP1/PPARGC1B/AXL/BCL2/PRDX5/STX2/SLC25A24/ABL1/SOD1/STK24/PDCD10/ATP2A2/ROMO1/MGMT/PRKAA1	38
BP	GO:2001235	positive regulation of apoptotic signaling pathway	22/1397	135/18903	0.0003613	0.00720223	0.00586723	GPER1/CAV1/NFATC4/NUPR1/TIMP3/PTEN/AGT/ITM2C/DAB2IP/THBS1/MSX1/PARK7/BAD/TNFSF12/PPP2R1B/CTNNA1/SERINC3/SOD1/FIS1/NF1/PPP2R1A/STK3	22
BP	GO:0002011	morphogenesis of an epithelial sheet	13/1397	60/18903	0.000361576	0.00720223	0.00586723	PHLDB2/AJUBA/FERMT2/CD151/JAG1/PTEN/FLNA/DAG1/ITGB1/RHOC/PDCD10/NOTCH1/RHOA	13
BP	GO:0030038	contractile actin filament bundle assembly	19/1397	109/18903	0.000374158	0.00740073	0.00602894	PHLDB2/DLC1/FERMT2/TJP1/TPM1/PDLIM1/ROCK2/SORBS3/ARHGAP6/PFN2/ITGB1BP1/RHOC/ITGB5/ACTG1/SLC9A1/ZYX/ABL1/CDC42/RHOA	19
BP	GO:0043149	stress fiber assembly	19/1397	109/18903	0.000374158	0.00740073	0.00602894	PHLDB2/DLC1/FERMT2/TJP1/TPM1/PDLIM1/ROCK2/SORBS3/ARHGAP6/PFN2/ITGB1BP1/RHOC/ITGB5/ACTG1/SLC9A1/ZYX/ABL1/CDC42/RHOA	19
BP	GO:0010644	cell communication by electrical coupling	9/1397	32/18903	0.000378341	0.00745741	0.00607511	ATP1A2/CAV1/CACNA1C/ATP1B2/GJC1/HRC/CALM2/PDE4D/SRI	9
BP	GO:0008360	regulation of cell shape	24/1397	154/18903	0.000395953	0.00777745	0.00633582	RND3/FN1/DLC1/PARVA/EPS8/ITGA7/FERMT2/RHOJ/CDC42EP5/PTK2/CDC42EP4/TPM1/DAG1/MYH9/MYH10/ALDOA/CDC42EP1/FYN/MYL12A/RHOC/MYL12B/RHOBTB3/RHOA/CFDP1	24
BP	GO:0051933	amino acid neurotransmitter reuptake	5/1397	10/18903	0.000402546	0.00786559	0.00640763	ATP1A2/SLC6A1/SLC6A12/SLC6A13/ITGB1	5
BP	GO:0042063	gliogenesis	40/1397	310/18903	0.000403221	0.00786559	0.00640763	MXRA8/LAMB2/DAAM2/PTN/LAMC3/PARD3/CD9/TRPC4/SYNE2/NDN/CSPG4/IL34/ATP1B2/TMEM98/LEF1/LGI4/PTEN/VIM/RRAS/NKX6-1/DAG1/DAB2IP/LRP1/HES1/TNFRSF21/APCDD1/APP/SUN1/ILK/TTC21B/METRN/ABL1/PPP1CC/SOD1/HDAC1/NAB1/NF1/UFL1/NOTCH1/RHOA	40
BP	GO:0035994	response to muscle stretch	8/1397	26/18903	0.000408166	0.00786996	0.00641119	TTN/DMD/PTK2/DDR2/SLC9A1/GPI/PIK3CA/GSN	8
BP	GO:0072010	glomerular epithelium development	8/1397	26/18903	0.000408166	0.00786996	0.00641119	LAMB2/EDNRA/FOXC1/FOXC2/EDNRB/JAG1/MAGI2/IQGAP1	8
BP	GO:0032373	positive regulation of sterol transport	10/1397	39/18903	0.000411792	0.00786996	0.00641119	CAV1/ABCA8/ABCA5/PLTP/PTCH1/LRP1/NR1H3/LDLRAP1/ANXA2/SCP2	10
BP	GO:0032376	positive regulation of cholesterol transport	10/1397	39/18903	0.000411792	0.00786996	0.00641119	CAV1/ABCA8/ABCA5/PLTP/PTCH1/LRP1/NR1H3/LDLRAP1/ANXA2/SCP2	10
BP	GO:0032570	response to progesterone	10/1397	39/18903	0.000411792	0.00786996	0.00641119	CAV1/CD38/TXNIP/YAP1/THBS1/NR1H3/BAD/ABHD2/GPI/NCOA2	10
BP	GO:0071634	regulation of transforming growth factor beta production	10/1397	39/18903	0.000411792	0.00786996	0.00641119	FN1/LUM/THBS1/LRRC32/LTBP1/CD46/BMPR1A/LAPTM4B/ATP6AP2/SMAD4	10
BP	GO:0009612	response to mechanical stimulus	30/1397	211/18903	0.000413473	0.00787547	0.00641568	ATP1A2/TTN/IGFBP2/MAP1B/PTN/DMD/ANO3/PDE2A/PTK2/AGT/TXNIP/ETV1/DAG1/THBS1/PTCH1/DDR2/FYN/SLC38A2/ACTG1/BAD/SLC9A1/CNN2/JUP/PKD1/GPI/PIK3CA/GSN/TGFBR2/CAPN2/RHOA	30
BP	GO:0010927	cellular component assembly involved in morphogenesis	20/1397	119/18903	0.000435806	0.008273	0.00673952	TTN/PHLDB2/PDGFRB/NEBL/CD9/CSRP2/PMP22/MYL9/TPM1/DAG1/ITGB1/PRKAR1A/LMOD1/PHLDB1/CFL2/ACTG1/MTMR2/TBPL1/SMAD4/TMOD3	20
BP	GO:0060419	heart growth	18/1397	102/18903	0.000452571	0.00856253	0.00697538	RGS4/FOXC1/HEY2/TBX2/FOXC2/PTEN/AGT/YAP1/PRKAR1A/SORBS2/BMPR1A/SAV1/FOXP1/ABL1/RBPJ/TGFBR2/NOTCH1/PDLIM5	18
BP	GO:0022604	regulation of cell morphogenesis	40/1397	312/18903	0.000459501	0.00866466	0.00705858	RND3/FN1/SH3D19/SPARC/DLC1/PARVA/EPS8/ITGA7/FERMT2/RHOJ/FBLN1/CDC42EP5/PTK2/ACTN4/CDC42EP4/WTIP/FLNA/TPM1/DAG1/MYH9/DOCK1/MYH10/ALDOA/CDC42EP1/FYN/MYL12A/ITGB1BP1/RHOC/MYL12B/MYO9A/ILK/RHOBTB3/MACF1/ARHGEF7/ABL1/PRKDC/CDC42/BCL9L/RHOA/CFDP1	40
BP	GO:0060249	anatomical structure homeostasis	42/1397	333/18903	0.000473351	0.00887869	0.00723294	LAMC1/EPAS1/PTH1R/APBB2/SLC12A2/FOXC1/LAMA2/CAV1/DMD/CA2/ESAM/TJP1/ATP1B2/VCL/LDB2/CD38/YAP1/STK39/ANGPT1/ITGB1/VSTM4/ALDOA/JAM3/WWTR1/APP/PFKM/CFL2/ACTG1/ACTB/MAP1A/AKT3/PPARGC1B/KMT2A/BCL2/LTBP3/TMEM106B/SOD1/NF1/ATP2A2/NOTCH1/PRKAA1/CCDC66	42
BP	GO:0042177	negative regulation of protein catabolic process	19/1397	111/18903	0.000473991	0.00887869	0.00723294	EGFR/TIMP3/TIMP1/FLNA/NQO1/DAB2IP/FYN/PARK7/ATRAID/LAPTM4B/MAP1A/GIPC1/ANXA2/CTSA/PIN1/SVIP/SMAD4/DDRGK1/PSMF1	19
BP	GO:0071453	cellular response to oxygen levels	26/1397	175/18903	0.000496077	0.00926174	0.00754499	EPAS1/MIR145/CAV1/AJUBA/SLC2A4/PTEN/VASN/DDR2/ROCK2/RORA/MALAT1/LMNA/CHCHD2/FAM162A/SDHD/CDKN1B/HP1BP3/ATP6V1G1/BAD/SLC9A1/TMBIM6/BCL2/RBPJ/STUB1/NOTCH1/PRKAA1	26
BP	GO:0060038	cardiac muscle cell proliferation	13/1397	62/18903	0.000506444	0.0094242	0.00767733	FOXC1/HEY2/TBX2/FOXC2/PTEN/YAP1/PRKAR1A/BMPR1A/SAV1/ABL1/RBPJ/TGFBR2/NOTCH1	13
BP	GO:0046620	regulation of organ growth	18/1397	103/18903	0.000511218	0.00948184	0.00772429	RGS4/FOXC1/HEY2/IGF2/TBX2/FOXC2/PTEN/YAP1/BMPR1A/LATS2/SAV1/FOXP1/SOD1/WWC3/RBPJ/STK3/TGFBR2/NOTCH1	18
BP	GO:0001953	negative regulation of cell-matrix adhesion	10/1397	40/18903	0.000513094	0.00948554	0.0077273	PHLDB2/DLC1/JAG1/PTEN/THBS1/ARHGAP6/ITGB1BP1/BCAS3/BCL6/NF1	10
BP	GO:0097191	extrinsic apoptotic signaling pathway	31/1397	224/18903	0.000535889	0.00980005	0.00798352	GPER1/CAV1/CTTN/KITLG/TIMP3/PTEN/AGT/YAP1/ITM2C/DAB2IP/THBS1/NDUFA13/GSTP1/SH3RF1/IFI6/LMNA/IFI27/PRDX2/LGALS3/PARK7/SIVA1/BAD/TNFSF12/PPP2R1B/CTNNA1/BCL2/UNC5B/GCLM/NF1/PPP2R1A/STK3	31
BP	GO:0044272	sulfur compound biosynthetic process	23/1397	148/18903	0.000539482	0.00980005	0.00798352	GGT5/GGT1/CHST2/PAPSS2/SLC7A11/ANGPT1/B3GNT2/TECR/GSTP1/ACSL3/DSEL/PDHB/HSD17B12/ADI1/CSAD/DSE/ELOVL5/CHST7/GCLM/EXT2/MRI1/HAGH/ACAT1	23
BP	GO:0051495	positive regulation of cytoskeleton organization	28/1397	195/18903	0.000539989	0.00980005	0.00798352	SEMA5A/MAP1B/CTTN/FERMT2/CDC42EP5/NCKAP1/CDC42EP4/TPM1/ROCK2/SYNPO2/CDC42EP1/DSTN/LMOD1/SORBS3/PFN2/ITGB1BP1/RHOC/CDKN1B/CFL2/WASL/ARL2/ABL1/DYNC1H1/BCAS3/CDC42/GSN/ABI2/RHOA	28
BP	GO:0044342	type B pancreatic cell proliferation	8/1397	27/18903	0.000542749	0.00980005	0.00798352	DACH1/NUPR1/IGFBP5/NKX6-1/IGFBP4/WDR13/BAD/SIDT2	8
BP	GO:0045116	protein neddylation	8/1397	27/18903	0.000542749	0.00980005	0.00798352	EPAS1/NEDD8/COPS6/RBX1/NAE1/RNF7/UBE2M/COPS7A	8
BP	GO:1903055	positive regulation of extracellular matrix organization	8/1397	27/18903	0.000542749	0.00980005	0.00798352	PHLDB2/AGT/DAG1/EFEMP2/DDR2/PHLDB1/EMILIN1/ABL1	8
BP	GO:0009743	response to carbohydrate	32/1397	234/18903	0.00054292	0.00980005	0.00798352	PRKAA2/COL4A3/SLC6A1/MAP1B/GPER1/COLEC12/COL6A2/LPL/SLC12A7/KCNB1/NQO1/NKX6-1/TXNIP/THBS1/VAMP2/MAP2K6/ZBTB20/CDKN1B/BAD/CAT/RPS6KA2/RAB11B/GCLM/HMGN3/PIK3CA/SMAD4/SRI/SIDT2/TGFBR2/PRKAA1/RHOA/RASAL2	32
BP	GO:0045446	endothelial cell differentiation	20/1397	121/18903	0.000544071	0.00980005	0.00798352	FSTL1/EDNRA/HEY2/S1PR3/APOLD1/TJP1/NR2F2/VCL/PDE2A/EDNRB/JAG1/ROCK2/CLIC4/ZEB1/PDE4D/ADD1/EDF1/SMAD4/RBPJ/NOTCH1	20
BP	GO:0034109	homotypic cell-cell adhesion	17/1397	95/18903	0.000545698	0.00980005	0.00798352	PEAR1/FN1/PRKG1/CD9/C1QTNF1/MYL9/VCL/FLNA/SLC7A11/MYH9/MYL12A/JAK1/ACTG1/ILK/ACTB/JUP/TLN1	17
BP	GO:0003229	ventricular cardiac muscle tissue development	12/1397	55/18903	0.0005638	0.0100931	0.00822223	EDNRA/FOXC1/HEY2/TBX3/FOXC2/TPM1/HOPX/ADAMTS9/BMPR1A/SMAD4/RBPJ/NOTCH1	12
BP	GO:0003208	cardiac ventricle morphogenesis	14/1397	71/18903	0.000604454	0.0107867	0.00878732	EDNRA/CPE/FOXC1/HEY2/SMARCD3/FOXC2/JAG1/TPM1/HEYL/BMPR1A/SMAD4/RBPJ/TGFBR2/NOTCH1	14
BP	GO:0010595	positive regulation of endothelial cell migration	21/1397	131/18903	0.000608697	0.0107893	0.00878942	SEMA5A/SPARC/SASH1/SMOC2/RHOJ/FOXC2/RRAS/AGT/ETS1/FGF1/ANGPT1/THBS1/ROCK2/ITGB1BP1/FOXP1/AKT3/GPI/ABL1/BCAS3/AAMP/PDCD6	21
BP	GO:0006195	purine nucleotide catabolic process	11/1397	48/18903	0.000610321	0.0107893	0.00878942	PDE5A/PDE8B/PDE7B/PDE2A/SUCLG1/PDE4D/HINT1/PDE8A/NUDT4/SUCLA2/ACAT1	11
BP	GO:0010171	body morphogenesis	11/1397	48/18903	0.000610321	0.0107893	0.00878942	PHLDB2/LEF1/RRAS/DAG1/MSX1/SGPL1/PHLDB1/CRISPLD2/ATP6AP2/SSBP3/ASPH	11
BP	GO:0045807	positive regulation of endocytosis	17/1397	96/18903	0.0006183	0.0108963	0.00887659	SGIP1/CD151/CD63/ANGPT1/LRP1/ANO6/HIP1/MAGI2/AP2M1/ATAD1/WASL/LDLRAP1/ANXA2/AXL/VPS28/HNRNPK/CDC42	17
BP	GO:0072595	maintenance of protein localization in organelle	10/1397	41/18903	0.000634195	0.0111417	0.00907652	SYNE1/SUN1/SKP1/PARK7/KDELR1/ARL2/TXN/GPAA1/RER1/CHCHD10	10
BP	GO:0036294	cellular response to decreased oxygen levels	24/1397	159/18903	0.000636245	0.0111432	0.00907766	EPAS1/MIR145/AJUBA/SLC2A4/PTEN/VASN/DDR2/ROCK2/RORA/MALAT1/LMNA/CHCHD2/FAM162A/SDHD/CDKN1B/HP1BP3/BAD/SLC9A1/TMBIM6/BCL2/RBPJ/STUB1/NOTCH1/PRKAA1	24
BP	GO:0044403	biological process involved in symbiotic interaction	39/1397	307/18903	0.0006436	0.0112372	0.00915426	FN1/EGFR/CAV2/CAV1/SLC20A2/IFITM1/IFITM3/ANPEP/BSG/LGALS1/LEF1/IGF2R/STOM/DAG1/ITGB1/ROCK2/NUCKS1/IFI27/EPHA2/GAPDH/IFITM2/CD46/CHMP5/ITGB5/SIVA1/SCARB2/CHMP2A/PPIB/CD81/AXL/HDAC1/THOC2/CDC42/GSN/IFIT1/PSMC3/LY6E/DYNLT1/ROMO1	39
BP	GO:0045765	regulation of angiogenesis	43/1397	349/18903	0.00066601	0.0115927	0.00944387	F3/ECM1/COL4A3/SEMA5A/SLC12A2/MIR145/SPARC/FOXC1/SASH1/SMOC2/DCN/COL4A2/RHOJ/TJP1/EMP2/ANGPTL4/FOXC2/PGF/TBXA2R/EPN2/RRAS/AGT/ETS1/FGF1/ITGB1/DAB2IP/THBS1/GPR4/ROCK2/ADAMTS9/EPHA2/JAK1/EMILIN1/RNH1/ADAMTS1/TNFSF12/AKT3/JUP/ABL1/NF1/PDCD10/TGFBR2/PDCD6	43
BP	GO:0010721	negative regulation of cell development	27/1397	188/18903	0.00067025	0.0115951	0.00944585	FRZB/MAP2/SEMA5A/DAAM2/PTN/S1PR3/NFATC4/FBLN1/TMEM98/ACTN4/EDNRB/PTEN/NKX6-1/PTPRS/HES1/SEMA6D/ITGB1BP1/BMPR1A/RYK/KIFAP3/RUFY3/CTNNA1/CTDSP1/NF1/HOOK3/DYNLT1/NOTCH1	27
BP	GO:0061138	morphogenesis of a branching epithelium	27/1397	188/18903	0.00067025	0.0115951	0.00944585	WNT6/EDNRA/FOXD1/NTN4/TBX3/COL4A1/NFATC4/SIX1/TBX2/FOXC2/LEF1/PBX1/AGT/YAP1/FGF1/DAG1/PTCH1/CLIC4/EPHA2/ILK/BCL2/PKD1/ABL1/TMED2/SMAD4/TGFBR2/NOTCH1	27
BP	GO:1901201	regulation of extracellular matrix assembly	6/1397	16/18903	0.000676087	0.0116604	0.00949907	PHLDB2/AGT/DAG1/PHLDB1/EMILIN1/NOTCH1	6
BP	GO:1901184	regulation of ERBB signaling pathway	15/1397	80/18903	0.000684216	0.0117045	0.00953496	ITGA1/GPER1/EGFR/AFAP1L2/AGT/DAB2IP/HIP1/WDR54/IFI6/PTPN12/VPS25/RNF115/MVB12A/CBLB/RBPJ	15
BP	GO:0042326	negative regulation of phosphorylation	46/1397	381/18903	0.000684906	0.0117045	0.00953496	CAMK2N1/TRIB2/CTDSPL/CAV1/DMD/PARD3/AJUBA/NR2F2/NUPR1/PKIG/FBLN1/PID1/PTEN/AGT/PTPN13/ANGPT1/DAB2IP/CALM2/LRP1/DDR2/CADM4/GSTP1/PRKAR1A/WWTR1/DYNLL1/PARK7/PDE4D/EMILIN1/ITGB1BP1/CDKN1B/CDKN1C/VPS25/COX11/LATS2/PMEPA1/ABL1/CTDSP1/TMED2/CDKN2D/CTDSP2/NF1/PRKDC/PIBF1/TERF2IP/CBLB/PPP2R1A	46
BP	GO:0044857	plasma membrane raft organization	5/1397	11/18903	0.000693125	0.0117045	0.00953496	CAV2/CAV1/EMP2/COLEC12/PACSIN2	5
BP	GO:0061314	Notch signaling involved in heart development	5/1397	11/18903	0.000693125	0.0117045	0.00953496	HEY2/JAG1/HEYL/RBPJ/NOTCH1	5
BP	GO:0086100	endothelin receptor signaling pathway	5/1397	11/18903	0.000693125	0.0117045	0.00953496	EDNRA/SIX1/EDNRB/GNA11/CDC42	5
BP	GO:1901844	regulation of cell communication by electrical coupling involved in cardiac conduction	5/1397	11/18903	0.000693125	0.0117045	0.00953496	CAV1/HRC/CALM2/PDE4D/SRI	5
BP	GO:1904238	pericyte cell differentiation	5/1397	11/18903	0.000693125	0.0117045	0.00953496	FOXC2/GPR4/ACTA2/EPHA2/NOTCH1	5
BP	GO:0043502	regulation of muscle adaptation	17/1397	97/18903	0.000699029	0.0117691	0.00958755	RGS4/PDE5A/TRPC3/MIR145/IGFBP5/SGCA/AGT/DAG1/ROCK2/FBXO32/LMNA/SLC9A1/CAMK2G/FOXP1/SMAD4/ATP2A2/NOTCH1	17
BP	GO:0045216	cell-cell junction organization	29/1397	208/18903	0.00070606	0.0118522	0.00965526	GJA4/CDH6/CAV1/PARD3/ESAM/CD9/FERMT2/TJP1/CDH11/GJC1/VCL/FLNA/AGT/HOPX/ROCK2/MPDZ/JAM3/EPHA2/MYO1C/RHOC/ARL2/ADD1/ACTG1/ACTB/JUP/CTNNA1/TLN1/CDC42/RHOA	29
BP	GO:0051924	regulation of calcium ion transport	35/1397	268/18903	0.000723476	0.0121086	0.00986415	ATP1A2/RGS4/MYLK/TRPC3/PDGFRB/GPER1/CAV1/DMD/TRPC6/CACNA1C/REM1/HRC/CACNA2D1/AGT/HSPA2/CALM2/AHNAK/HES1/TRPC1/FYN/LGALS3/PDE4D/SESTD1/RRAD/TMEM38B/C4orf3/PSEN2/SLC9A1/CAMK2G/TMBIM6/BCL2/ABL1/GSTO1/SRI/RHOA	35
BP	GO:0009261	ribonucleotide catabolic process	11/1397	49/18903	0.000735154	0.0122677	0.0099938	PDE5A/PDE8B/PDE7B/PDE2A/SUCLG1/PDE4D/HINT1/PDE8A/NUDT4/SUCLA2/ACAT1	11
BP	GO:0001101	response to acid chemical	21/1397	133/18903	0.000746335	0.0123385	0.0100514	COL5A2/EGFR/COL1A2/COL4A1/SIX1/COL6A1/KCNB1/NQO1/FYN/ZEB1/SESN3/CDKN1B/BAD/LAMTOR5/RRAGA/TMBIM6/GCLM/PIK3CA/UFL1/CAPN2/RHOA	21
BP	GO:0030168	platelet activation	21/1397	133/18903	0.000746335	0.0123385	0.0100514	PEAR1/FN1/DGKB/PRKG1/CD9/C1QTNF1/MYL9/VCL/FLNA/ADRA2C/SLC7A11/MYH9/DGKH/MYL12A/ACTG1/ILK/ACTB/AXL/C1GALT1C1/TLN1/PIK3CA	21
BP	GO:0032388	positive regulation of intracellular transport	28/1397	199/18903	0.000748131	0.0123385	0.0100514	MAP2/ZIC1/EHD2/KCNB1/FLNA/STOM/VAMP2/LEPROT/FYN/MYO1C/FEZ1/ITGB1BP1/UBL5/CAMK1/MTMR2/RUFY3/LDLRAP1/ANXA2/JUP/CD81/PDCD5/DYNC1H1/FIS1/BCAS3/PDCD10/OAZ2/SCP2/PRKAA1	28
BP	GO:0010881	regulation of cardiac muscle contraction by regulation of the release of sequestered calcium ion	7/1397	22/18903	0.00075248	0.0123385	0.0100514	ATP1A2/DMD/CACNA1C/HRC/CALM2/TMEM38B/GSTO1	7
BP	GO:0061318	renal filtration cell differentiation	7/1397	22/18903	0.00075248	0.0123385	0.0100514	LAMB2/EDNRA/FOXC2/EDNRB/JAG1/MAGI2/IQGAP1	7
BP	GO:0072112	podocyte differentiation	7/1397	22/18903	0.00075248	0.0123385	0.0100514	LAMB2/EDNRA/FOXC2/EDNRB/JAG1/MAGI2/IQGAP1	7
BP	GO:0030100	regulation of endocytosis	29/1397	209/18903	0.000763292	0.0124436	0.0101371	SGIP1/CAV1/CD151/CD63/ANGPT1/LRP1/ANO6/HIP1/NR1H3/MAGI2/LRPAP1/WDR54/AP2M1/ATAD1/LGALS3/PACSIN2/WASL/MTMR2/LDLRAP1/ANXA2/AXL/ABL1/ARF1/VPS28/SYT11/HNRNPK/RAB5B/CDC42/RUFY2	29
BP	GO:0045732	positive regulation of protein catabolic process	29/1397	209/18903	0.000763292	0.0124436	0.0101371	TRIB2/SH3D19/CAV1/NUPR1/RNF180/AXIN2/DAB2IP/NDUFA13/LRP1/SH3RF1/NKD1/TMTC3/CSNK1E/SUMO2/USP13/CDKN1B/BBS7/TNFSF12/CD81/RBX1/FBXL5/VPS28/NDFIP1/DDRGK1/CBLB/OAZ2/PSMC3/STUB1/PSMC5	29
BP	GO:0070296	sarcoplasmic reticulum calcium ion transport	10/1397	42/18903	0.000777946	0.0125865	0.0102535	ATP1A2/DMD/CACNA1C/HRC/CALM2/PDE4D/TMEM38B/GSTO1/SRI/ATP2A2	10
BP	GO:0071604	transforming growth factor beta production	10/1397	42/18903	0.000777946	0.0125865	0.0102535	FN1/LUM/THBS1/LRRC32/LTBP1/CD46/BMPR1A/LAPTM4B/ATP6AP2/SMAD4	10
BP	GO:0014808	release of sequestered calcium ion into cytosol by sarcoplasmic reticulum	9/1397	35/18903	0.000778731	0.0125865	0.0102535	ATP1A2/DMD/CACNA1C/HRC/CALM2/PDE4D/TMEM38B/GSTO1/SRI	9
BP	GO:0006940	regulation of smooth muscle contraction	13/1397	65/18903	0.000813993	0.0130817	0.0106569	ATP1A2/MIR145/GPER1/CAV1/PRKG1/PLCE1/CTTN/ARHGAP42/ADORA2B/TBXA2R/ADRA2C/SOD1/RHOA	13
BP	GO:0032507	maintenance of protein location in cell	13/1397	65/18903	0.000813993	0.0130817	0.0106569	CAV1/DZIP1/SYNE1/SUN1/SKP1/PARK7/KDELR1/ARL2/TXN/GPAA1/RER1/GSN/CHCHD10	13
BP	GO:0008217	regulation of blood pressure	27/1397	191/18903	0.000857201	0.0137371	0.0111908	ECE1/ATP1A2/ENPEP/EDNRA/COL1A2/ARHGAP42/ABCC9/ANPEP/NR2F2/EMP2/EDNRB/TBXA2R/TPM1/AGT/GNA11/STK39/NCALD/ACTA2/ADH5/NPY1R/PDE4D/EMILIN1/ATP6AP2/RPS6KA2/EXT2/SOD1/RHOA	27
BP	GO:0032271	regulation of protein polymerization	28/1397	201/18903	0.000876318	0.0140038	0.011408	SPTBN1/MAP2/MAP1B/DAAM2/CTTN/ESAM/EPS8/KANK3/CDC42EP5/NCKAP1/CDC42EP4/SVIL/ARPC1A/TPPP3/CDC42EP1/LMOD1/PFN2/CDKN1B/ADD3/ARL2/ADD1/ARHGEF7/ABL1/VDAC2/GSN/PLEKHG2/TMOD3/RHOA	28
BP	GO:0030177	positive regulation of Wnt signaling pathway	22/1397	144/18903	0.000890491	0.0141902	0.0115599	SEMA5A/MIR145/DAAM2/EGFR/CAV1/GPC5/LEF1/WLS/YAP1/NKD1/CSNK1E/PLEKHA4/TMEM9/ILK/ATP6AP2/TTC21B/MACF1/JUP/PIN1/ABL1/PBXIP1/RBPJ	22
BP	GO:0140053	mitochondrial gene expression	24/1397	163/18903	0.00091163	0.0144272	0.011753	MRPL33/MRPL43/MRPL41/MRPL40/GADD45GIP1/COA3/PPARGC1B/MRPL51/AURKAIP1/MRPL2/MRPS26/TUFM/MRPS25/MRPS9/MRPL36/IARS2/HSD17B10/CHCHD10/MRPS18B/MRPL28/MRPS5/MRPS18C/MRPL19/PRKAA1	24
BP	GO:0014812	muscle cell migration	18/1397	108/18903	0.000913019	0.0144272	0.011753	PDGFRB/PRKG1/PARVA/SIX1/IGFBP5/TPM1/AGT/LRP1/DDR2/SEMA6D/ITGB1BP1/BMPR1A/ABHD2/ADAMTS1/BCL2/NF1/AAMP/RHOA	18
BP	GO:0032231	regulation of actin filament bundle assembly	18/1397	108/18903	0.000913019	0.0144272	0.011753	PHLDB2/DLC1/FERMT2/TJP1/FLNA/TPM1/ROCK2/SYNPO2/SORBS3/ARHGAP6/PFN2/ITGB1BP1/RHOC/ACTG1/SLC9A1/ABL1/CDC42/RHOA	18
BP	GO:0042058	regulation of epidermal growth factor receptor signaling pathway	14/1397	74/18903	0.00093038	0.0146606	0.0119431	ITGA1/GPER1/EGFR/AFAP1L2/AGT/DAB2IP/HIP1/WDR54/IFI6/PTPN12/VPS25/RNF115/MVB12A/CBLB	14
BP	GO:0048010	vascular endothelial growth factor receptor signaling pathway	12/1397	58/18903	0.000933039	0.0146617	0.011944	FOXC1/TMEM204/FOXC2/PGF/PTK2/EPN2/DAB2IP/CADM4/FYN/EMILIN1/AXL/PDCD6	12
BP	GO:1901342	regulation of vasculature development	43/1397	355/18903	0.000942953	0.0147764	0.0120375	F3/ECM1/COL4A3/SEMA5A/SLC12A2/MIR145/SPARC/FOXC1/SASH1/SMOC2/DCN/COL4A2/RHOJ/TJP1/EMP2/ANGPTL4/FOXC2/PGF/TBXA2R/EPN2/RRAS/AGT/ETS1/FGF1/ITGB1/DAB2IP/THBS1/GPR4/ROCK2/ADAMTS9/EPHA2/JAK1/EMILIN1/RNH1/ADAMTS1/TNFSF12/AKT3/JUP/ABL1/NF1/PDCD10/TGFBR2/PDCD6	43
BP	GO:0060412	ventricular septum morphogenesis	10/1397	43/18903	0.000947448	0.0148058	0.0120614	HEY2/TBX3/HEYL/HES1/BMPR1A/SAV1/SMAD4/RBPJ/TGFBR2/NOTCH1	10
BP	GO:1903514	release of sequestered calcium ion into cytosol by endoplasmic reticulum	9/1397	36/18903	0.000971038	0.0151327	0.0123277	ATP1A2/DMD/CACNA1C/HRC/CALM2/PDE4D/TMEM38B/GSTO1/SRI	9
BP	GO:0055119	relaxation of cardiac muscle	6/1397	17/18903	0.000979886	0.0151869	0.0123719	ATP1A2/PDE5A/HRC/PDE4D/PIK3CA/GSN	6
BP	GO:1903729	regulation of plasma membrane organization	6/1397	17/18903	0.000979886	0.0151869	0.0123719	MYH9/AHNAK/WASL/ASAP1/ANXA2/GSN	6
BP	GO:0051457	maintenance of protein location in nucleus	7/1397	23/18903	0.00101326	0.0156185	0.0127235	SYNE1/SUN1/SKP1/PARK7/ARL2/TXN/CHCHD10	7
BP	GO:0072311	glomerular epithelial cell differentiation	7/1397	23/18903	0.00101326	0.0156185	0.0127235	LAMB2/EDNRA/FOXC2/EDNRB/JAG1/MAGI2/IQGAP1	7
BP	GO:0030178	negative regulation of Wnt signaling pathway	25/1397	174/18903	0.0010338	0.0158919	0.0129462	FRZB/IGFBP2/RBMS3/CAV1/DKK3/NFATC4/IGFBP6/TLE1/AXIN2/IGFBP4/DAB2IP/TBX18/LRP1/MCC/APCDD1/WWTR1/NKD1/JADE1/CSNK1E/LATS2/RBX1/HDAC1/LZTS2/STK3/NOTCH1	25
BP	GO:0010952	positive regulation of peptidase activity	27/1397	194/18903	0.00108802	0.01668	0.0135882	F3/FN1/COL4A3/PCOLCE2/GPER1/CAV1/DLC1/UACA/FBLN1/PCOLCE/NDUFA13/ROCK2/HIP1/FYN/APP/FAM162A/BAD/PSME1/PDCD5/FIS1/RPS27L/IFT57/GSN/DDRGK1/ASPH/PDCD6/RHOA	27
BP	GO:0071709	membrane assembly	12/1397	59/18903	0.00109377	0.0167229	0.0136232	SPTBN1/CAV2/CAV1/EMP2/RFTN1/PTEN/PACSIN2/CHMP5/CHMP2A/ANXA2/REEP3/STX2	12
BP	GO:0014854	response to inactivity	5/1397	12/18903	0.0011161	0.016962	0.0138179	SGCA/DAG1/FBXO32/CAT/PIK3CA	5
BP	GO:0030948	negative regulation of vascular endothelial growth factor receptor signaling pathway	5/1397	12/18903	0.0011161	0.016962	0.0138179	EPN2/DAB2IP/CADM4/EMILIN1/PDCD6	5
BP	GO:0009062	fatty acid catabolic process	17/1397	101/18903	0.00111841	0.016962	0.0138179	CPT1A/BDH2/PCCA/ABHD2/ACAD10/ACADVL/ETFB/ECI2/ECI1/AIG1/ECH1/ILVBL/HSD17B4/ECHS1/HSD17B10/ACAT1/SCP2	17
BP	GO:1904035	regulation of epithelial cell apoptotic process	18/1397	110/18903	0.00113662	0.0171922	0.0140055	SEMA5A/GPER1/CD248/NUPR1/ANGPTL4/YAP1/ANGPT1/PLA2R1/THBS1/ANO6/CDKN1B/BAD/SAV1/BCL2/ABL1/CAST/GSN/PRKAA1	18
BP	GO:1905521	regulation of macrophage migration	10/1397	44/18903	0.00114605	0.0172886	0.014084	RARRES2/CD9/IL34/PTK2/THBS1/MTUS1/EMILIN1/CNN2/CD81/MIF	10
BP	GO:0017015	regulation of transforming growth factor beta receptor signaling pathway	22/1397	147/18903	0.00117583	0.017597	0.0143352	CAV2/CAV1/DKK3/TGFB1I1/VASN/THBS1/ZEB1/LTBP1/EMILIN1/CDKN1C/C20orf27/LATS2/GIPC1/RBBP7/PIN1/PMEPA1/GLG1/HDAC1/SMAD4/RBBP4/BCL9L/STUB1	22
BP	GO:0045598	regulation of fat cell differentiation	22/1397	147/18903	0.00117583	0.017597	0.0143352	TRIB2/FRZB/GPER1/RARRES2/RUNX1T1/CCDC3/ADIRF/FERMT2/SIX1/TGFB1I1/LPL/JAG1/YAP1/AXIN2/HES1/RORA/WWTR1/AAMDC/ZBTB16/SAV1/CCDC85B/STK3	22
BP	GO:0051592	response to calcium ion	22/1397	147/18903	0.00117583	0.017597	0.0143352	PRKAA2/TTN/SLC6A1/TRPC3/CAV1/KCNB1/TXNIP/CALM2/THBS1/RASGRP2/CLIC4/TRPC1/IQGAP1/ADD1/ACTG1/BAD/CPNE3/MNAT1/SLC25A24/SYT11/PDCD6/PRKAA1	22
BP	GO:0001933	negative regulation of protein phosphorylation	41/1397	338/18903	0.00118935	0.0177524	0.0144618	CAMK2N1/TRIB2/CTDSPL/CAV1/DMD/PARD3/NR2F2/PKIG/FBLN1/PID1/PTEN/AGT/PTPN13/ANGPT1/DAB2IP/CALM2/LRP1/CADM4/GSTP1/PRKAR1A/WWTR1/PARK7/PDE4D/EMILIN1/ITGB1BP1/CDKN1B/CDKN1C/VPS25/LATS2/PMEPA1/ABL1/CTDSP1/TMED2/CDKN2D/CTDSP2/NF1/PRKDC/PIBF1/TERF2IP/CBLB/PPP2R1A	41
BP	GO:0010634	positive regulation of epithelial cell migration	25/1397	176/18903	0.00121968	0.0181572	0.0147916	SEMA5A/SPARC/SASH1/SMOC2/RHOJ/FOXC2/PTK2/RRAS/AGT/ETS1/FGF1/ANGPT1/DOCK1/THBS1/ROCK2/ITGB1BP1/IQSEC1/FOXP1/AKT3/GPI/ABL1/BCAS3/AAMP/TGFBR2/PDCD6	25
BP	GO:0001823	mesonephros development	17/1397	102/18903	0.00125157	0.0185344	0.0150989	WNT6/FOXD1/FOXC1/SIX1/FOXC2/PBX1/AGT/FGF1/PTCH1/HES1/ZBTB16/ILK/CAT/BCL2/PKD1/SMAD4/SMAD5	17
BP	GO:0014897	striated muscle hypertrophy	17/1397	102/18903	0.00125157	0.0185344	0.0150989	RGS4/TTN/PDE5A/TRPC3/MIR145/HEY2/IGFBP5/AGT/ROCK2/LMNA/SORBS2/SLC9A1/FOXP1/SMAD4/ATP2A2/NOTCH1/PDLIM5	17
BP	GO:0051897	positive regulation of protein kinase B signaling	19/1397	120/18903	0.00126067	0.0186204	0.0151689	F3/SEMA5A/EGFR/IGF2/FERMT2/C1QTNF1/IGFBP5/PTK2/F10/ANGPT1/ITGB1/THBS1/HIP1/PARK7/ITGB1BP1/TXN/AXL/PIK3CA/STK3	19
BP	GO:0030239	myofibril assembly	13/1397	68/18903	0.00126494	0.0186348	0.0151806	TTN/PDGFRB/NEBL/CSRP2/MYL9/TPM1/ITGB1/PRKAR1A/LMOD1/CFL2/ACTG1/SMAD4/TMOD3	13
BP	GO:0050678	regulation of epithelial cell proliferation	48/1397	414/18903	0.00127605	0.0187124	0.0152439	F3/ECM1/LAMC1/COL4A3/SEMA5A/SPARC/PTPRK/EGFR/CAV2/CAV1/PTN/IGF2/SIX1/NR2F2/NUPR1/CYP7B1/PGF/EDNRB/JAG1/PTEN/YAP1/FGF1/DAB2IP/THBS1/PTCH1/HES1/MCC/KLF9/ZEB1/CDKN1B/WDR13/CDKN1C/BMPR1A/EGFL7/BAD/SAV1/TNFSF12/AKT3/IFT57/NF1/PRKDC/CDC42/AIMP1/RBPJ/PDCD10/STK3/PDCD6/NOTCH1	48
BP	GO:1905517	macrophage migration	12/1397	60/18903	0.00127682	0.0187124	0.0152439	RARRES2/CD9/IL34/PTK2/EDNRB/THBS1/MTUS1/LGALS3/EMILIN1/CNN2/CD81/MIF	12
BP	GO:0003205	cardiac chamber development	24/1397	167/18903	0.00128476	0.0187431	0.0152689	FHL2/EDNRA/CPE/FOXC1/HEY2/SMARCD3/PARVA/TBX3/TBX2/PDE2A/FOXC2/JAG1/TPM1/HEYL/HES1/BMPR1A/ADAMTS1/SAV1/CRELD1/SMAD4/TRIP11/RBPJ/TGFBR2/NOTCH1	24
BP	GO:0007411	axon guidance	31/1397	236/18903	0.00128554	0.0187431	0.0152689	ECE1/NFASC/CNTN4/LAMB2/EDNRA/SEMA5A/FOXD1/LAMA2/BSG/NOTCH3/KALRN/PTK2/ARHGEF25/KIF5C/ETV1/DAG1/B3GNT2/PTCH1/NEXN/FYN/APP/EPHA2/FEZ1/SEMA6D/RYK/UNC5B/DPYSL2/USP33/SMAD4/NPTN/NOTCH1	31
BP	GO:0007097	nuclear migration	7/1397	24/18903	0.0013401	0.0194883	0.015876	SYNE2/CLMN/LMNA/SUN1/DYNC1H1/CDC42/HOOK3	7
BP	GO:0051492	regulation of stress fiber assembly	16/1397	94/18903	0.00136793	0.0197933	0.0161244	PHLDB2/DLC1/FERMT2/TJP1/TPM1/ROCK2/SORBS3/ARHGAP6/PFN2/ITGB1BP1/RHOC/ACTG1/SLC9A1/ABL1/CDC42/RHOA	16
BP	GO:0097485	neuron projection guidance	31/1397	237/18903	0.00137698	0.0197933	0.0161244	ECE1/NFASC/CNTN4/LAMB2/EDNRA/SEMA5A/FOXD1/LAMA2/BSG/NOTCH3/KALRN/PTK2/ARHGEF25/KIF5C/ETV1/DAG1/B3GNT2/PTCH1/NEXN/FYN/APP/EPHA2/FEZ1/SEMA6D/RYK/UNC5B/DPYSL2/USP33/SMAD4/NPTN/NOTCH1	31
BP	GO:0042551	neuron maturation	10/1397	45/18903	0.00137736	0.0197933	0.0161244	AGRN/EDNRA/NTN4/KCNB1/EDNRB/LGI4/APP/FARP2/BCL2/CLN5	10
BP	GO:0015812	gamma-aminobutyric acid transport	6/1397	18/18903	0.00137857	0.0197933	0.0161244	SLC6A1/SLC6A12/SLC6A13/TRPC4/GABBR1/NF1	6
BP	GO:0019184	nonribosomal peptide biosynthetic process	6/1397	18/18903	0.00137857	0.0197933	0.0161244	GGT5/GGT1/SLC7A11/BDH2/GCLM/HAGH	6
BP	GO:0031623	receptor internalization	19/1397	121/18903	0.00139415	0.0199159	0.0162243	CAV1/CD9/CD63/ANGPT1/ITGB1/LRP1/MAGI2/LRPAP1/WDR54/AP2M1/ATAD1/LMBRD1/MTMR2/LDLRAP1/ANXA2/CD81/AP2A1/ARF1/CLTC	19
BP	GO:0032355	response to estradiol	19/1397	121/18903	0.00139415	0.0199159	0.0162243	IGFBP2/SLC6A1/MAP1B/PDGFRB/GPER1/EGFR/NR2F2/SSTR2/PAM/NQO1/CD38/AGT/TXNIP/PTCH1/CDKN1B/BAD/CAT/GPI/FAM210B	19
BP	GO:1903076	regulation of protein localization to plasma membrane	17/1397	103/18903	0.00139792	0.0199195	0.0162272	SPTBN1/GPER1/EGFR/PID1/ITGB1/LRP1/TMEM59/PTPN9/ACSL3/CNPY4/AP2M1/EPHA2/LGALS3/ACTB/LDLRAP1/RER1/CLTC	17
BP	GO:0043270	positive regulation of ion transport	36/1397	289/18903	0.0014451	0.02054	0.0167327	SLC6A1/MYLK/TRPC3/EDNRA/SLC12A2/PDGFRB/GPER1/CAV1/DMD/TRPC6/TESC/ATP1B2/GABBR1/ACTN4/KCNB1/FLNA/CACNA2D1/FXYD1/AGT/HSPA2/STK39/PLA2R1/ITGB1/CALM2/ANO6/FHL1/TRPC1/MAP2K6/LGALS3/ACTB/SLC9A1/MIF/ABL1/COX17/GSTO1/SRI	36
BP	GO:0055002	striated muscle cell development	13/1397	69/18903	0.00145507	0.0206067	0.016787	TTN/PDGFRB/NEBL/CSRP2/MYL9/TPM1/ITGB1/PRKAR1A/LMOD1/CFL2/ACTG1/SMAD4/TMOD3	13
BP	GO:0030308	negative regulation of cell growth	26/1397	188/18903	0.00146072	0.0206067	0.016787	RGS4/FRZB/MAP2/SEMA5A/RERG/MEG3/GNG4/AGT/PTPRS/NDUFA13/MSX1/FHL1/JADE1/SEMA6D/CDKN1B/RYK/DCBLD2/FOXP1/RBBP7/BCL2/CCDC85B/CDKN2D/SMAD4/BCL6/NDUFS3/PPP2R1A	26
BP	GO:1903169	regulation of calcium ion transmembrane transport	26/1397	188/18903	0.00146072	0.0206067	0.016787	ATP1A2/TRPC3/GPER1/CAV1/DMD/CACNA1C/REM1/HRC/CACNA2D1/HSPA2/CALM2/AHNAK/TRPC1/FYN/PDE4D/SESTD1/RRAD/TMEM38B/C4orf3/PSEN2/SLC9A1/TMBIM6/BCL2/ABL1/GSTO1/SRI	26
BP	GO:0048260	positive regulation of receptor-mediated endocytosis	11/1397	53/18903	0.00146516	0.0206179	0.0167962	SGIP1/CD63/ANGPT1/HIP1/MAGI2/AP2M1/ATAD1/WASL/LDLRAP1/ANXA2/HNRNPK	11
BP	GO:0061053	somite development	15/1397	86/18903	0.00148115	0.0207912	0.0169374	FRZB/FOXC1/SIX1/FOXC2/LEF1/AXIN2/PTCH1/TBX18/NKD1/BMPR1A/TMED2/SMAD4/PRKDC/RBPJ/NOTCH1	15
BP	GO:2001233	regulation of apoptotic signaling pathway	44/1397	374/18903	0.00149212	0.0208934	0.0170206	GPER1/CAV1/CTTN/NFATC4/NUPR1/TIMP3/PTEN/AGT/YAP1/ITM2C/DAB2IP/THBS1/NDUFA13/MSX1/GSTP1/SH3RF1/SLC25A4/IFI6/LMNA/PRDX2/LGALS3/PARK7/TMEM14A/BAD/TNFSF12/TMBIM6/PPP2R1B/CTNNA1/BCL2/UNC5B/MIF/GCLM/SERINC3/SOD1/HDAC1/FIS1/HNRNPK/CDKN2D/NF1/VDAC2/NDUFS3/PPP2R1A/STK3/GHITM	44
BP	GO:0032543	mitochondrial translation	20/1397	131/18903	0.00150554	0.0210292	0.0171312	MRPL33/MRPL43/MRPL41/MRPL40/GADD45GIP1/COA3/MRPL51/AURKAIP1/MRPL2/MRPS26/TUFM/MRPS25/MRPS9/MRPL36/IARS2/MRPS18B/MRPL28/MRPS5/MRPS18C/MRPL19	20
BP	GO:0014909	smooth muscle cell migration	16/1397	95/18903	0.00153446	0.0212927	0.0173459	PDGFRB/PRKG1/PARVA/IGFBP5/TPM1/AGT/LRP1/DDR2/SEMA6D/BMPR1A/ABHD2/ADAMTS1/BCL2/NF1/AAMP/RHOA	16
BP	GO:1903844	regulation of cellular response to transforming growth factor beta stimulus	22/1397	150/18903	0.00153635	0.0212927	0.0173459	CAV2/CAV1/DKK3/TGFB1I1/VASN/THBS1/ZEB1/LTBP1/EMILIN1/CDKN1C/C20orf27/LATS2/GIPC1/RBBP7/PIN1/PMEPA1/GLG1/HDAC1/SMAD4/RBBP4/BCL9L/STUB1	22
BP	GO:0043500	muscle adaptation	19/1397	122/18903	0.00153946	0.0212927	0.0173459	RGS4/PDE5A/TRPC3/MIR145/HEY2/IGFBP5/SGCA/AGT/DAG1/ROCK2/FBXO32/LMNA/SLC9A1/CAMK2G/FOXP1/SMAD4/GSN/ATP2A2/NOTCH1	19
BP	GO:0048675	axon extension	19/1397	122/18903	0.00153946	0.0212927	0.0173459	MAP2/FN1/LAMB2/EDNRA/SEMA5A/MAP1B/CTTN/NDN/VCL/NKX6-1/PTPRS/ITGB1/SEMA6D/RAPH1/RYK/RUFY3/MACF1/ABL1/DPYSL2	19
BP	GO:0014896	muscle hypertrophy	17/1397	104/18903	0.00155847	0.0214507	0.0174746	RGS4/TTN/PDE5A/TRPC3/MIR145/HEY2/IGFBP5/AGT/ROCK2/LMNA/SORBS2/SLC9A1/FOXP1/SMAD4/ATP2A2/NOTCH1/PDLIM5	17
BP	GO:0110020	regulation of actomyosin structure organization	17/1397	104/18903	0.00155847	0.0214507	0.0174746	PHLDB2/DLC1/FERMT2/TJP1/TPM1/ROCK2/SORBS3/ARHGAP6/PFN2/ITGB1BP1/RHOC/ACTG1/SLC9A1/ABL1/SMAD4/CDC42/RHOA	17
BP	GO:0006816	calcium ion transport	50/1397	440/18903	0.0015778	0.0216116	0.0176057	GJA4/CACHD1/ATP1A2/RGS4/MYLK/TRPC3/EDNRA/PDGFRB/GPER1/CAV1/DMD/TRPC6/CACNA1C/TRPC4/REM1/HRC/EDNRB/FLNA/CACNA2D1/ANXA6/AGT/HSPA2/CALM2/ANO6/AHNAK/HES1/TRPC1/FYN/TMCO1/LGALS3/PDE4D/MICU3/SESTD1/RRAD/TMEM38B/C4orf3/PSEN2/SLC9A1/CAMK2G/ANXA2/TMBIM6/BCL2/PKD1/ABL1/GSTO1/ITPR1/SRI/STOML2/ATP2A2/RHOA	50
BP	GO:0045936	negative regulation of phosphate metabolic process	50/1397	440/18903	0.0015778	0.0216116	0.0176057	CAMK2N1/TRIB2/CTDSPL/CAV1/DMD/PARD3/AJUBA/NR2F2/NUPR1/PKIG/FBLN1/PID1/PTEN/AGT/PTPN13/ANGPT1/DAB2IP/CALM2/LRP1/DDR2/ROCK2/CADM4/GSTP1/PRKAR1A/WWTR1/DYNLL1/LGALS3/PARK7/PDE4D/EMILIN1/ITGB1BP1/IQGAP1/CDKN1B/CDKN1C/VPS25/COX11/LATS2/PMEPA1/ABL1/FIS1/CTDSP1/TMED2/CDKN2D/CTDSP2/NF1/PRKDC/PIBF1/TERF2IP/CBLB/PPP2R1A	50
BP	GO:0055117	regulation of cardiac muscle contraction	14/1397	78/18903	0.00158449	0.0216508	0.0176376	ATP1A2/PDE5A/CAV1/DMD/CACNA1C/HRC/CALM2/PDE4D/TMEM38B/SLC9A1/JUP/GSTO1/SRI/ATP2A2	14
BP	GO:0090090	negative regulation of canonical Wnt signaling pathway	21/1397	141/18903	0.00159919	0.0217991	0.0177584	FRZB/IGFBP2/RBMS3/CAV1/DKK3/IGFBP6/TLE1/AXIN2/IGFBP4/DAB2IP/TBX18/MCC/WWTR1/NKD1/JADE1/LATS2/RBX1/HDAC1/LZTS2/STK3/NOTCH1	21
BP	GO:0022898	regulation of transmembrane transporter activity	36/1397	291/18903	0.00163115	0.0221813	0.0180698	ATP1A2/KCNE4/EDNRA/CAV1/DMD/TRPC6/FXYD6/ABCC9/TESC/ATP1B2/REM1/HRC/HCN2/ACTN4/UTRN/CACNA2D1/FXYD1/STOM/HSPA2/STK39/ITGB1/CALM2/AHNAK/VAMP2/FHL1/APP/PARK7/PDE4D/RRAD/C4orf3/ACTB/SLC9A1/BCL2/COX17/GSTO1/SRI	36
BP	GO:0035637	multicellular organismal signaling	24/1397	170/18903	0.0016447	0.0223119	0.0181761	ATP1A2/NFASC/KCNE4/GPER1/CAV1/CACNA1C/ABCC9/ATP1B2/GJC1/HRC/HCN2/FLNA/CACNA2D1/AGT/CALM2/TBX18/JAM3/TRPC1/PDE4D/SLC9A1/JUP/SOD1/SRI/ATP2A2	24
BP	GO:0010563	negative regulation of phosphorus metabolic process	50/1397	441/18903	0.0016555	0.0224047	0.0182518	CAMK2N1/TRIB2/CTDSPL/CAV1/DMD/PARD3/AJUBA/NR2F2/NUPR1/PKIG/FBLN1/PID1/PTEN/AGT/PTPN13/ANGPT1/DAB2IP/CALM2/LRP1/DDR2/ROCK2/CADM4/GSTP1/PRKAR1A/WWTR1/DYNLL1/LGALS3/PARK7/PDE4D/EMILIN1/ITGB1BP1/IQGAP1/CDKN1B/CDKN1C/VPS25/COX11/LATS2/PMEPA1/ABL1/FIS1/CTDSP1/TMED2/CDKN2D/CTDSP2/NF1/PRKDC/PIBF1/TERF2IP/CBLB/PPP2R1A	50
BP	GO:0051881	regulation of mitochondrial membrane potential	13/1397	70/18903	0.00166831	0.0225242	0.0183491	DCN/PID1/IFI6/NDUFC2/PARK7/BAD/NDUFS1/BCL2/HEBP2/GCLM/ABL1/SOD1/STOML2	13
BP	GO:0046718	viral entry into host cell	22/1397	151/18903	0.00167582	0.0225717	0.0183878	EGFR/CAV2/CAV1/SLC20A2/IFITM1/IFITM3/ANPEP/BSG/LGALS1/DAG1/ITGB1/EPHA2/IFITM2/CD46/ITGB5/SIVA1/SCARB2/CD81/AXL/GSN/LY6E/DYNLT1	22
BP	GO:0072537	fibroblast activation	5/1397	13/18903	0.00170382	0.0228943	0.0186507	PDGFRB/DDR2/ACTA2/AKAP12/GCLM	5
BP	GO:0072523	purine-containing compound catabolic process	11/1397	54/18903	0.0017192	0.023024	0.0187563	PDE5A/PDE8B/PDE7B/PDE2A/SUCLG1/PDE4D/HINT1/PDE8A/NUDT4/SUCLA2/ACAT1	11
BP	GO:0006875	cellular metal ion homeostasis	48/1397	420/18903	0.00172161	0.023024	0.0187563	ATP1A2/SLC30A10/PTH1R/TRPC3/EDNRA/SLC12A2/GPER1/CAV2/CAV1/DMD/TRPC6/CACNA1C/TRPC4/ATP1B2/HRC/FLNA/ANXA6/AGT/CALM2/TRPC1/APP/TMCO1/SLC39A13/PDE4D/MICU3/SLC22A17/TMEM38B/ATP6V1G1/MT1E/CYBRD1/SLC9A1/TMBIM6/BCL2/SLC39A7/ABL1/ARF1/SLC40A1/SOD1/FIS1/GSTO1/SMAD4/NPTN/NDFIP1/ITPR1/SRI/STOML2/ATP2A2/ISCU	48
BP	GO:0032469	endoplasmic reticulum calcium ion homeostasis	7/1397	25/18903	0.00174381	0.0231566	0.0188643	APP/TMCO1/TMBIM6/BCL2/FIS1/ITPR1/ATP2A2	7
BP	GO:0045932	negative regulation of muscle contraction	7/1397	25/18903	0.00174381	0.0231566	0.0188643	ATP1A2/PDE5A/PRKG1/ARHGAP42/ADORA2B/SOD1/SRI	7
BP	GO:2000209	regulation of anoikis	7/1397	25/18903	0.00174381	0.0231566	0.0188643	CAV1/PTK2/TLE1/ITGB1/BCL2/PIK3CA/NOTCH1	7
BP	GO:0070588	calcium ion transmembrane transport	41/1397	345/18903	0.00175671	0.0232733	0.0189594	CACHD1/ATP1A2/TRPC3/EDNRA/GPER1/CAV1/DMD/TRPC6/CACNA1C/TRPC4/REM1/HRC/EDNRB/FLNA/CACNA2D1/ANXA6/HSPA2/CALM2/ANO6/AHNAK/TRPC1/FYN/TMCO1/PDE4D/MICU3/SESTD1/RRAD/TMEM38B/C4orf3/PSEN2/SLC9A1/ANXA2/TMBIM6/BCL2/PKD1/ABL1/GSTO1/ITPR1/SRI/STOML2/ATP2A2	41
BP	GO:0007193	adenylate cyclase-inhibiting G protein-coupled receptor signaling pathway	14/1397	79/18903	0.0017974	0.0237568	0.0193532	HTR1F/EDNRA/GRM3/GRM8/S1PR3/PTGDR2/SSTR2/GABBR1/PDE2A/FLNA/ADCY6/GNAI1/NPY1R/AKAP12	14
BP	GO:1901889	negative regulation of cell junction assembly	8/1397	32/18903	0.00184676	0.0242957	0.0197922	PHLDB2/DLC1/PTEN/THBS1/ROCK2/ARHGAP6/ITGB1BP1/BCAS3	8
BP	GO:1903715	regulation of aerobic respiration	8/1397	32/18903	0.00184676	0.0242957	0.0197922	NUPR1/COX7A1/COX7A2/PARK7/DNAJC15/ARL2/ISCU/RHOA	8
BP	GO:0055007	cardiac muscle cell differentiation	19/1397	124/18903	0.00186886	0.0245293	0.0199825	RGS4/FHL2/TTN/PDGFRB/HEY2/NEBL/TBX3/AGT/ITGB1/SGCB/TBX18/LMNA/SORBS2/BMPR1A/SLC9A1/FOXP1/SMAD4/RBPJ/PDLIM5	19
BP	GO:0055072	iron ion homeostasis	15/1397	88/18903	0.00187839	0.0245973	0.020038	EPAS1/GLRX5/BDH2/SLC22A17/ATP6V1G1/BOLA3/CYBRD1/HMOX2/SLC40A1/SOD1/FBXL5/SMAD4/NDFIP1/SRI/ISCU	15
BP	GO:2000136	regulation of cell proliferation involved in heart morphogenesis	6/1397	19/18903	0.00188993	0.024679	0.0201045	TBX3/SIX1/HES1/SMAD4/RBPJ/NOTCH1	6
BP	GO:0030003	cellular cation homeostasis	55/1397	499/18903	0.00189489	0.024679	0.0201045	ATP1A2/SLC30A10/PTH1R/TRPC3/EDNRA/SLC12A2/GPER1/CAV2/CAV1/DMD/CA2/TRPC6/CACNA1C/TRPC4/ATP1B2/HRC/FLNA/ANXA6/AGT/CALM2/CLIC4/TRPC1/APP/TMCO1/SLC39A13/PDE4D/MICU3/SLC22A17/TMEM38B/TMEM9/ATP6V1G1/MT1E/ATP6AP2/CYBRD1/SLC9A1/TMBIM6/BCL2/CLN5/SLC39A7/TMEM106B/ABL1/ARF1/SLC40A1/SOD1/FIS1/GSTO1/HVCN1/SMAD4/NPTN/NDFIP1/ITPR1/SRI/STOML2/ATP2A2/ISCU	55
BP	GO:0001558	regulation of cell growth	48/1397	422/18903	0.00189776	0.024679	0.0201045	RGS4/FRZB/MAP2/FN1/IGFBP7/SEMA5A/MAP1B/EGFR/PLCE1/TEAD1/CTTN/RERG/MEG3/GNG4/IGFBP5/NKX6-1/CD38/AGT/YAP1/PTPRS/IGFBP4/NDUFA13/RASGRP2/MSX1/FHL1/CLSTN1/JADE1/SEMA6D/CDKN1B/EXTL3/RYK/RUFY3/DCBLD2/SLC9A1/FOXP1/MACF1/RBBP7/BCL2/ABL1/CCDC85B/CDKN2D/DPYSL2/SMAD4/BCL6/CDC42/NDUFS3/PPP2R1A/RHOA	48
BP	GO:0099518	vesicle cytoskeletal trafficking	13/1397	71/18903	0.00190676	0.024679	0.0201045	MYO1B/MAP2/ACTN4/MYO6/DYNC1I1/BLOC1S1/MYO1C/KIF13A/WASL/KIFAP3/DYNC1H1/KIF3A/AP3S1	13
BP	GO:1990748	cellular detoxification	18/1397	115/18903	0.00190781	0.024679	0.0201045	GPX3/SOD3/NQO1/MGST3/GSTP1/ADH5/ESD/PRDX2/PARK7/PRDX4/TXN/CAT/GSTK1/GSTT1/PRDX5/SOD1/GSTO1/RDH11	18
BP	GO:0055076	transition metal ion homeostasis	21/1397	143/18903	0.0019108	0.024679	0.0201045	SLC30A10/EPAS1/GLRX5/BDH2/APP/SLC39A13/SLC22A17/ATP6V1G1/MT1E/BOLA3/CYBRD1/HMOX2/SLC39A7/ARF1/SLC40A1/SOD1/FBXL5/SMAD4/NDFIP1/SRI/ISCU	21
BP	GO:0031099	regeneration	26/1397	192/18903	0.00197755	0.0254584	0.0207395	PRRX1/LAMB2/MAP1B/PTN/CD9/CPT1A/PGF/IGF2R/PTEN/FLNA/SGCA/YAP1/PTPRS/DAG1/HOPX/PTCH1/CPQ/CDKN1B/PTPN12/CD81/CTNNA1/AXL/BCL2/STK24/TGFBR2/NOTCH1	26
BP	GO:0044091	membrane biogenesis	12/1397	63/18903	0.00198361	0.0254584	0.0207395	SPTBN1/CAV2/CAV1/EMP2/RFTN1/PTEN/PACSIN2/CHMP5/CHMP2A/ANXA2/REEP3/STX2	12
BP	GO:0043467	regulation of generation of precursor metabolites and energy	20/1397	134/18903	0.00198824	0.0254584	0.0207395	PRKAA2/IGF2/NUPR1/COX7A1/COX7A2/APP/CHCHD2/ZBTB20/PARK7/CISD1/PGAM1/DNAJC15/ARL2/PIK3CA/COX17/DYRK2/ISCU/GHITM/PRKAA1/RHOA	20
BP	GO:0032409	regulation of transporter activity	39/1397	326/18903	0.00198915	0.0254584	0.0207395	ATP1A2/KCNE4/EDNRA/CAV1/DMD/TRPC6/FXYD6/ABCC9/TESC/ATP1B2/REM1/HRC/HCN2/ACTN4/UTRN/CACNA2D1/FXYD1/STOM/HSPA2/STK39/ITGB1/CALM2/AHNAK/NR1H3/VAMP2/FHL1/APP/PARK7/PDE4D/RRAD/C4orf3/ACTB/SLC9A1/KMT2A/BCL2/COX17/GSTO1/NDFIP1/SRI	39
BP	GO:1904375	regulation of protein localization to cell periphery	19/1397	125/18903	0.0020547	0.026238	0.0213746	SPTBN1/GPER1/EGFR/PID1/DAG1/ITGB1/GNAI1/LRP1/TMEM59/PTPN9/ACSL3/CNPY4/AP2M1/EPHA2/LGALS3/ACTB/LDLRAP1/RER1/CLTC	19
BP	GO:0030518	intracellular steroid hormone receptor signaling pathway	18/1397	116/18903	0.0021058	0.02683	0.0218568	GPER1/CYP7B1/KANK2/YAP1/HEYL/LBH/RBFOX2/PARK7/UFSP2/DDX17/FOXP1/PPARGC1B/PMEPA1/HDAC1/UFL1/DDRGK1/NR3C1/RHOA	18
BP	GO:0001763	morphogenesis of a branching structure	27/1397	203/18903	0.00213129	0.0270155	0.0220079	WNT6/EDNRA/FOXD1/NTN4/TBX3/COL4A1/NFATC4/SIX1/TBX2/FOXC2/LEF1/PBX1/AGT/YAP1/FGF1/DAG1/PTCH1/CLIC4/EPHA2/ILK/BCL2/PKD1/ABL1/TMED2/SMAD4/TGFBR2/NOTCH1	27
BP	GO:0048661	positive regulation of smooth muscle cell proliferation	16/1397	98/18903	0.00213946	0.0270155	0.0220079	PDGFRB/NOTCH3/IGFBP5/AGT/THBS1/RBPMS2/DDR2/BMPR1A/ADAMTS1/LDLRAP1/FOXP1/MNAT1/HDAC1/PIK3CA/NF1/TGFBR2	16
BP	GO:0072163	mesonephric epithelium development	16/1397	98/18903	0.00213946	0.0270155	0.0220079	WNT6/FOXD1/FOXC1/SIX1/FOXC2/PBX1/AGT/FGF1/PTCH1/HES1/ILK/CAT/BCL2/PKD1/SMAD4/SMAD5	16
BP	GO:0072164	mesonephric tubule development	16/1397	98/18903	0.00213946	0.0270155	0.0220079	WNT6/FOXD1/FOXC1/SIX1/FOXC2/PBX1/AGT/FGF1/PTCH1/HES1/ILK/CAT/BCL2/PKD1/SMAD4/SMAD5	16
BP	GO:0010762	regulation of fibroblast migration	9/1397	40/18903	0.00215886	0.0270791	0.0220598	MIR145/PTK2/ITGB1/THBS1/DDR2/ACTA2/AKAP12/ITGB1BP1/ARHGEF7	9
BP	GO:0035886	vascular associated smooth muscle cell differentiation	9/1397	40/18903	0.00215886	0.0270791	0.0220598	EDNRA/MIR145/HEY2/GPER1/NFATC4/EFEMP2/SGCB/HES1/NOTCH1	9
BP	GO:0043001	Golgi to plasma membrane protein transport	9/1397	40/18903	0.00215886	0.0270791	0.0220598	SPTBN1/VAMP5/OPTN/VAMP2/ACSL3/RAB34/KIF13A/PREPL/MACF1	9
BP	GO:0060411	cardiac septum morphogenesis	13/1397	72/18903	0.00217262	0.0271914	0.0221512	HEY2/PARVA/TBX3/TBX2/JAG1/HEYL/HES1/BMPR1A/SAV1/SMAD4/RBPJ/TGFBR2/NOTCH1	13
BP	GO:2000773	negative regulation of cellular senescence	7/1397	26/18903	0.00223588	0.0279214	0.0227459	SLC30A10/TBX2/PTEN/AKT3/MIF/ABL1/BCL6	7
BP	GO:0003231	cardiac ventricle development	19/1397	126/18903	0.00225588	0.028109	0.0228988	EDNRA/CPE/FOXC1/HEY2/SMARCD3/TBX3/PDE2A/FOXC2/JAG1/TPM1/HEYL/HES1/BMPR1A/SAV1/SMAD4/TRIP11/RBPJ/TGFBR2/NOTCH1	19
BP	GO:0048147	negative regulation of fibroblast proliferation	8/1397	33/18903	0.00228207	0.0283729	0.0231137	CAV1/PAWR/DACH1/NUPR1/DAB2IP/GSTP1/KMT2A/NF1	8
BP	GO:0061136	regulation of proteasomal protein catabolic process	26/1397	194/18903	0.00228993	0.0284082	0.0231424	TRIB2/FOXF2/CAV1/NUPR1/RNF180/AXIN2/DAB2IP/SH3RF1/TMTC3/PARK7/CSNK1E/SUMO2/USP13/BBS7/PSME1/MAP1A/GIPC1/RBX1/PKD1/SVIP/UFL1/DDRGK1/PSMC3/STUB1/PSMC5/PSMF1	26
BP	GO:0090263	positive regulation of canonical Wnt signaling pathway	17/1397	108/18903	0.0023647	0.0291512	0.0237478	SEMA5A/MIR145/DAAM2/EGFR/CAV1/GPC5/WLS/YAP1/CSNK1E/PLEKHA4/TMEM9/ILK/ATP6AP2/TTC21B/JUP/PIN1/RBPJ	17
BP	GO:0090398	cellular senescence	17/1397	108/18903	0.0023647	0.0291512	0.0237478	PRELP/SLC30A10/PAWR/TBX3/TBX2/PTEN/PLA2R1/MAPK10/MAP2K6/LMNA/CDKN1B/SMC6/BMPR1A/AKT3/MIF/ABL1/BCL6	17
BP	GO:0030900	forebrain development	44/1397	383/18903	0.0023688	0.0291512	0.0237478	ATP1A2/CCDC141/ZIC1/SEMA5A/EGFR/DLC1/PRKG1/EMX2/TBX3/SYNE2/NR2F2/ATP1B2/SSTR2/NOTCH3/LEF1/PTEN/SLC7A11/C12orf57/DAB2IP/MSX1/HES1/TACC1/FYN/APP/ZEB1/SUN1/DYNC2H1/FEZ1/SLC38A2/UQCRQ/BTBD3/BMPR1A/BAD/RYK/FOXP1/TTC21B/AXL/EZH1/HDAC1/NF1/RBPJ/HOOK3/NOTCH1/RHOA	44
BP	GO:0072593	reactive oxygen species metabolic process	30/1397	235/18903	0.00237539	0.0291512	0.0237478	SLC30A10/PDGFRB/PID1/GPX3/SOD3/NQO1/AGT/AKR1C1/PLA2R1/THBS1/NDUFA13/GSTP1/FYN/IFI6/NDUFC2/PRDX2/PARK7/PRDX4/NDUFS4/NDUFS1/CAT/BCL2/PRDX5/CBR1/SOD1/HVCN1/NDUFS3/TGFBR2/ROMO1/RHOA	30
BP	GO:0043401	steroid hormone mediated signaling pathway	20/1397	136/18903	0.00237796	0.0291512	0.0237478	GPER1/CYP7B1/KANK2/YAP1/HEYL/LBH/RBFOX2/PARK7/UFSP2/PGRMC2/ABHD2/DDX17/FOXP1/PPARGC1B/PMEPA1/HDAC1/UFL1/DDRGK1/NR3C1/RHOA	20
BP	GO:0003300	cardiac muscle hypertrophy	16/1397	99/18903	0.00238074	0.0291512	0.0237478	RGS4/TTN/PDE5A/TRPC3/MIR145/HEY2/AGT/ROCK2/LMNA/SORBS2/SLC9A1/FOXP1/SMAD4/ATP2A2/NOTCH1/PDLIM5	16
BP	GO:0033157	regulation of intracellular protein transport	29/1397	225/18903	0.00240989	0.0294444	0.0239866	ZIC1/PKIG/KCNB1/FLNA/STOM/ANGPT1/VAMP2/LEPROT/FYN/IFI27/PARK7/MYO1C/ITGB1BP1/UBL5/CAMK1/TXN/RUFY3/JUP/CD81/PDCD5/ERLEC1/FIS1/BCAS3/LMAN1/SVIP/NF1/PDCD10/OAZ2/PRKAA1	29
BP	GO:0019058	viral life cycle	38/1397	319/18903	0.00242906	0.0296146	0.0241253	EGFR/CAV2/CAV1/SLC20A2/IFITM1/IFITM3/ANPEP/BSG/LGALS1/STOM/DAG1/ITGB1/NUCKS1/NFIA/IFI27/EPHA2/IFITM2/CD46/CHMP5/ITGB5/SIVA1/SCARB2/LAMTOR5/CHMP2A/PPIB/SPCS1/CD81/AXL/BCL2/VPS28/ISG15/MVB12A/RAB1B/GSN/IFIT1/LY6E/DYNLT1/NOTCH1	38
BP	GO:1901654	response to ketone	27/1397	205/18903	0.0024543	0.0298124	0.0242864	PRKAA2/IGFBP7/CAV1/TBXA2R/NQO1/CD38/ADCY6/TXNIP/YAP1/AXIN2/STK39/THBS1/GNAI1/ROCK2/NR1H3/FBXO32/KLF9/PARK7/ADCY3/BAD/ABHD2/FOXP1/GPI/PIK3CA/NCOA2/NR3C1/PRKAA1	27
BP	GO:0048193	Golgi vesicle transport	36/1397	298/18903	0.00245582	0.0298124	0.0242864	SPTBN1/MYO1B/CYTH3/VAMP5/OPTN/VAMP2/ACSL3/ARL3/BCAP29/KDELR1/RAB34/CNIH4/KIF13A/YIF1A/TMED4/ARL1/PREPL/MACF1/AP2A1/NRBP2/TRAPPC2L/RER1/LMAN1/TMED2/SCAMP1/RAB1B/TRIP11/AP3S1/YIPF6/ARF5/TMEM115/COG4/PDCD6/SEC23A/TMED7/NAPA	36
BP	GO:0060415	muscle tissue morphogenesis	13/1397	73/18903	0.00246821	0.0298986	0.0243566	TTN/MYLK/EDNRA/MIR145/FOXC1/HEY2/FOXC2/TPM1/EFEMP2/BMPR1A/SMAD4/RBPJ/NOTCH1	13
BP	GO:0050768	negative regulation of neurogenesis	21/1397	146/18903	0.00247396	0.0299043	0.0243612	MAP2/SEMA5A/DAAM2/PTN/NFATC4/TMEM98/PTEN/NKX6-1/PTPRS/HES1/SEMA6D/BMPR1A/RYK/KIFAP3/RUFY3/CTNNA1/CTDSP1/NF1/HOOK3/DYNLT1/NOTCH1	21
BP	GO:0035791	platelet-derived growth factor receptor-beta signaling pathway	5/1397	14/18903	0.00249019	0.0299724	0.0244167	PDGFRB/LRP1/HIP1/PTPN12/ABL1	5
BP	GO:0046185	aldehyde catabolic process	5/1397	14/18903	0.00249019	0.0299724	0.0244167	ADH5/ESD/PARK7/PNKD/HAGH	5
BP	GO:0043161	proteasome-mediated ubiquitin-dependent protein catabolic process	50/1397	450/18903	0.0025198	0.0302644	0.0246546	TRIB2/FOXF2/CAV1/RNF180/AXIN2/FBXO17/SH3RF1/WWTR1/IFI27/SKP1/PARK7/CSNK1E/PSMB1/SUMO2/BBS7/PSMA7/ANAPC11/PSMB6/MAP1A/GIPC1/FAM8A1/KLHL42/ANAPC16/DNAJC18/RBX1/TMEM129/PSMB2/PSMB4/RNF187/PSMB3/ERLEC1/PPP2CB/FBXL5/HERC2/SVIP/PSMD8/PSMB5/RNF5/UFL1/DDRGK1/FBXO9/ANAPC13/PSMC3/STUB1/FBXL3/PSMB7/PSMC5/SEC61B/PSMD13/PSMF1	50
BP	GO:0061323	cell proliferation involved in heart morphogenesis	6/1397	20/18903	0.0025328	0.0303561	0.0247293	TBX3/SIX1/HES1/SMAD4/RBPJ/NOTCH1	6
BP	GO:0051261	protein depolymerization	18/1397	118/18903	0.00255381	0.0305431	0.0248817	SPTBN1/NOSTRIN/SEMA5A/MAP1B/EPS8/SVIL/LIMA1/DSTN/LMOD1/PLEKHH2/CFL2/ADD3/ADD1/MAP1A/PIK3CA/GSN/TMOD3/ASPH	18
BP	GO:0014912	negative regulation of smooth muscle cell migration	9/1397	41/18903	0.00258768	0.0308179	0.0251055	PRKG1/IGFBP5/TPM1/LRP1/SEMA6D/BMPR1A/ABHD2/NF1/RHOA	9
BP	GO:0032509	endosome transport via multivesicular body sorting pathway	9/1397	41/18903	0.00258768	0.0308179	0.0251055	TMEM50A/LEPROT/TMEM50B/CHMP5/LAPTM4B/VPS25/CHMP2A/VPS28/MVB12A	9
BP	GO:0003170	heart valve development	12/1397	65/18903	0.00261238	0.0310467	0.0252919	HEY2/PDE2A/JAG1/HEYL/ROCK2/ADAMTS9/EMILIN1/BMPR1A/SMAD4/RBPJ/TGFBR2/NOTCH1	12
BP	GO:0050680	negative regulation of epithelial cell proliferation	24/1397	176/18903	0.00262848	0.0311726	0.0253945	COL4A3/SPARC/PTPRK/CAV2/CAV1/NR2F2/NUPR1/PTEN/DAB2IP/THBS1/PTCH1/MCC/KLF9/ZEB1/CDKN1B/WDR13/CDKN1C/SAV1/IFT57/NF1/AIMP1/PDCD10/STK3/NOTCH1	24
BP	GO:0030901	midbrain development	15/1397	91/18903	0.00263772	0.0312167	0.0254304	WLS/CALM2/MSX1/HES1/NDRG2/DYNLL1/CSNK1E/UQCRQ/YWHAQ/ACTB/RYK/COX6B1/CDC42/NDUFS3/RHOA	15
BP	GO:0043457	regulation of cellular respiration	10/1397	49/18903	0.00271043	0.0320103	0.0260769	NUPR1/COX7A1/COX7A2/PARK7/CISD1/DNAJC15/ARL2/PIK3CA/ISCU/RHOA	10
BP	GO:0010001	glial cell differentiation	29/1397	227/18903	0.00274896	0.0323977	0.0263925	MXRA8/LAMB2/DAAM2/PTN/LAMC3/PARD3/TRPC4/IL34/TMEM98/LEF1/LGI4/PTEN/VIM/NKX6-1/DAG1/LRP1/HES1/TNFRSF21/APP/ILK/TTC21B/METRN/ABL1/SOD1/HDAC1/NAB1/NF1/NOTCH1/RHOA	29
BP	GO:0036474	cell death in response to hydrogen peroxide	8/1397	34/18903	0.00279391	0.0327908	0.0267127	PAWR/DDR2/PARK7/TXN/PDE8A/FOXP1/ABL1/PDCD10	8
BP	GO:0090162	establishment of epithelial cell polarity	8/1397	34/18903	0.00279391	0.0327908	0.0267127	PARD3/CYTH3/HES1/FAT1/MYO9A/PKD1/CDC42/RHOA	8
BP	GO:0014829	vascular associated smooth muscle contraction	7/1397	27/18903	0.00282848	0.0329233	0.0268206	EDNRA/ARHGAP42/EDNRB/CD38/AGT/ACTA2/RHOA	7
BP	GO:0018126	protein hydroxylation	7/1397	27/18903	0.00282848	0.0329233	0.0268206	PLOD1/FKBP10/PLOD2/P4HA2/PRDX4/P4HTM/ASPH	7
BP	GO:0032511	late endosome to vacuole transport via multivesicular body sorting pathway	7/1397	27/18903	0.00282848	0.0329233	0.0268206	TMEM50A/LEPROT/TMEM50B/CHMP5/VPS25/VPS28/MVB12A	7
BP	GO:2000737	negative regulation of stem cell differentiation	7/1397	27/18903	0.00282848	0.0329233	0.0268206	TBX3/JAG1/YAP1/LBH/HES1/N4BP2L2/NOTCH1	7
BP	GO:0043087	regulation of GTPase activity	43/1397	376/18903	0.00286867	0.0333225	0.0271458	AGRN/ARHGAP29/RGS4/ASAP2/RAPGEF4/RAPGEF5/CAV2/PRKG1/ARHGAP42/AJUBA/FERMT2/SYDE1/PTK2/RGS6/RGS11/AGAP1/DOCK9/ITGB1/DAB2IP/RASGRP2/DOCK6/CCPG1/ARHGAP6/EPHA2/RSU1/ITGB1BP1/IQGAP1/IQSEC1/ARL2/MYO9A/ASAP1/PIN1/ARHGEF7/SOD1/BCAS3/RABGAP1/TMED2/BCL6/NF1/PBXIP1/CBLB/WDR41/RASAL2	43
BP	GO:0019395	fatty acid oxidation	17/1397	110/18903	0.00288317	0.0334223	0.0272272	CPT1A/ADH5/BDH2/CYP4V2/ACAD10/ACADVL/ETFB/ECI2/ECI1/ECH1/ILVBL/HSD17B4/ECHS1/HSD17B10/ACAT1/SCP2/PRKAA1	17
BP	GO:0001656	metanephros development	15/1397	92/18903	0.00294114	0.0339551	0.0276612	LAMB2/FOXD1/PDGFRB/SIX1/FOXC2/YAP1/PTCH1/HES1/WWTR1/ID3/BCL2/PKD1/SMAD4/NF1/ACAT1	15
BP	GO:0046031	ADP metabolic process	15/1397	92/18903	0.00294114	0.0339551	0.0276612	PRKAA2/NUPR1/ALDOA/APP/ZBTB20/PFKM/GAPDH/PGAM1/ARL2/BAD/TPI1/GPI/AK3/AK1/PRKAA1	15
BP	GO:0001756	somitogenesis	12/1397	66/18903	0.00298264	0.0343564	0.0279881	FOXC1/FOXC2/LEF1/AXIN2/TBX18/NKD1/BMPR1A/TMED2/SMAD4/PRKDC/RBPJ/NOTCH1	12
BP	GO:0044409	entry into host	22/1397	158/18903	0.00298804	0.0343564	0.0279881	EGFR/CAV2/CAV1/SLC20A2/IFITM1/IFITM3/ANPEP/BSG/LGALS1/DAG1/ITGB1/EPHA2/IFITM2/CD46/ITGB5/SIVA1/SCARB2/CD81/AXL/GSN/LY6E/DYNLT1	22
BP	GO:0043254	regulation of protein-containing complex assembly	46/1397	410/18903	0.00303954	0.0348776	0.0284127	SPTBN1/MAP2/MAP1B/DAAM2/CTTN/ESAM/EPS8/AJUBA/FERMT2/KANK3/CDC42EP5/NCKAP1/CDC42EP4/SVIL/ARPC1A/DAB2IP/TPPP3/CDC42EP1/HES1/JAM3/LMOD1/PFN2/LGALS3/PARK7/RHOC/DNAJC15/CDKN1B/ADD3/FARP2/ARL2/ADD1/THRA/ASAP1/ARHGEF7/PMEPA1/ABL1/SVIP/ISG15/VDAC2/CDC42/GSN/PLEKHG2/TMOD3/STUB1/RHOA/NAPA	46
BP	GO:0048008	platelet-derived growth factor receptor signaling pathway	11/1397	58/18903	0.00311851	0.0357114	0.0290919	F3/PDGFRB/CSPG4/TXNIP/LRP1/HIP1/SGPL1/IQGAP1/PTPN12/ABL1/CBLB	11
BP	GO:0032890	regulation of organic acid transport	13/1397	75/18903	0.00315836	0.0360946	0.0294041	ATP1A2/RGS4/SLC6A1/SLC12A2/GABBR1/AGT/PLA2R1/ITGB1/THBS1/MAP2K6/SLC38A2/MIF/FIS1	13
BP	GO:0038084	vascular endothelial growth factor signaling pathway	10/1397	50/18903	0.00316793	0.036131	0.0294337	PDGFRB/FOXC1/SMOC2/DCN/PGF/CD63/DAB2IP/CADM4/MYO1C/PIK3CA	10
BP	GO:0006631	fatty acid metabolic process	45/1397	400/18903	0.00318264	0.0362258	0.029511	PRKAA2/EPHX1/MGLL/CAV1/PTGDS/GGT5/GGT1/LPL/CPT1A/PAM/AKR1C1/TECR/NR1H3/GSTP1/ACSL3/ADH5/BDH2/CYP4V2/SGPL1/PCCA/NDUFAB1/CYP2U1/ABHD2/PTGR1/ACAD10/ACADVL/HSD17B12/ETFB/ELOVL5/ECI2/ECI1/MIF/AIG1/CBR1/ECH1/ASAH1/ILVBL/HSD17B4/FADS3/ECHS1/HSD17B10/PIBF1/ACAT1/SCP2/PRKAA1	45
BP	GO:0035050	embryonic heart tube development	14/1397	84/18903	0.00324927	0.0369099	0.0300683	ECE1/EDNRA/FOXC1/TBX3/TBX2/FOXC2/YAP1/HES1/BBS7/IFT57/TMED2/CDC42/TGFBR2/NOTCH1	14
BP	GO:0044070	regulation of anion transport	15/1397	93/18903	0.00327272	0.0370276	0.0301642	ATP1A2/RGS4/SLC6A1/SLC12A2/GABRE/CA2/GABBR1/AGT/PLA2R1/ITGB1/MAP2K6/SLC38A2/RAB11B/MIF/PRKAA1	15
BP	GO:1904705	regulation of vascular associated smooth muscle cell proliferation	15/1397	93/18903	0.00327272	0.0370276	0.0301642	GPER1/PRKG1/IGFBP5/PTEN/TPM1/AGT/EFEMP2/DDR2/NDRG2/CDKN1B/BMPR1A/ADAMTS1/LDLRAP1/NF1/RHOA	15
BP	GO:0019932	second-messenger-mediated signaling	37/1397	314/18903	0.0033025	0.03729	0.0303779	ATP1A2/FHL2/PDE5A/PDE7B/EGFR/DMD/PRKG1/PLCE1/PTGDR2/GUCY1A2/CACNA1C/NFATC4/ADORA2B/HRC/PDE2A/EDNRB/TBXA2R/AGT/CALM2/THBS1/NCALD/PDE3A/GNAI1/RCAN2/PDE4D/INPP5A/TMEM38B/HINT1/SLC9A1/NUDT4/FIS1/GSTO1/ITPR1/DYRK2/ATP2A2/PPP2R1A/PRKAA1	37
BP	GO:0099515	actin filament-based transport	6/1397	21/18903	0.00332683	0.0374152	0.03048	MYO1B/SYNE2/ACTN4/MYO6/MYO1C/WASL	6
BP	GO:1902307	positive regulation of sodium ion transmembrane transport	6/1397	21/18903	0.00332683	0.0374152	0.03048	DMD/TESC/ATP1B2/ACTN4/FXYD1/SLC9A1	6
BP	GO:0030833	regulation of actin filament polymerization	20/1397	140/18903	0.00335212	0.0376248	0.0306507	SPTBN1/DAAM2/CTTN/ESAM/EPS8/KANK3/CDC42EP5/NCKAP1/CDC42EP4/SVIL/ARPC1A/CDC42EP1/LMOD1/PFN2/ADD3/ADD1/GSN/PLEKHG2/TMOD3/RHOA	20
BP	GO:0060914	heart formation	8/1397	35/18903	0.003391	0.0379475	0.0309136	SMARCD3/SIX1/EMP2/AXIN2/HES1/BMPR1A/RBPJ/NOTCH1	8
BP	GO:1904377	positive regulation of protein localization to cell periphery	12/1397	67/18903	0.00339428	0.0379475	0.0309136	SPTBN1/GPER1/EGFR/ITGB1/GNAI1/LRP1/PTPN9/ACSL3/CNPY4/EPHA2/LGALS3/RER1	12
BP	GO:0043473	pigmentation	17/1397	112/18903	0.00349269	0.0389332	0.0317166	EDNRA/KITLG/TBX2/EDNRB/CD63/GNA11/ADAMTS9/BLOC1S1/DCTN2/USP13/KIF13A/BBS7/ATP6AP2/BCL2/RAB11B/NF1/AP3S1	17
BP	GO:0003413	chondrocyte differentiation involved in endochondral bone morphogenesis	5/1397	15/18903	0.00350998	0.0389332	0.0317166	ANXA6/AXIN2/COL27A1/TRIP11/TGFBR2	5
BP	GO:0010649	regulation of cell communication by electrical coupling	5/1397	15/18903	0.00350998	0.0389332	0.0317166	CAV1/HRC/CALM2/PDE4D/SRI	5
BP	GO:0070831	basement membrane assembly	5/1397	15/18903	0.00350998	0.0389332	0.0317166	LAMB2/PHLDB2/NTN4/DAG1/PHLDB1	5
BP	GO:0030041	actin filament polymerization	23/1397	170/18903	0.00352266	0.0389736	0.0317495	SPTBN1/DAAM2/CTTN/ESAM/EPS8/KANK3/CDC42EP5/NCKAP1/CDC42EP4/SVIL/ARPC1A/CDC42EP1/LMOD1/ARHGAP6/PFN2/ADD3/WASL/ADD1/ABL1/GSN/PLEKHG2/TMOD3/RHOA	23
BP	GO:0051647	nucleus localization	7/1397	28/18903	0.00353428	0.0389736	0.0317495	SYNE2/CLMN/LMNA/SUN1/DYNC1H1/CDC42/HOOK3	7
BP	GO:1904385	cellular response to angiotensin	7/1397	28/18903	0.00353428	0.0389736	0.0317495	SLC30A10/MIR145/CAV1/CA2/AGT/DDR2/ROCK2	7
BP	GO:0006635	fatty acid beta-oxidation	13/1397	76/18903	0.00355809	0.0391597	0.0319011	CPT1A/BDH2/ACAD10/ACADVL/ETFB/ECI2/ECI1/ECH1/HSD17B4/ECHS1/HSD17B10/ACAT1/SCP2	13
BP	GO:1903078	positive regulation of protein localization to plasma membrane	11/1397	59/18903	0.00358251	0.039352	0.0320577	SPTBN1/GPER1/EGFR/ITGB1/LRP1/PTPN9/ACSL3/CNPY4/EPHA2/LGALS3/RER1	11
BP	GO:0008306	associative learning	14/1397	85/18903	0.00363155	0.0398133	0.0324335	ATP1A2/SLC6A1/PDE8B/AGT/SLC7A11/ITGB1/SPECC1/APP/ADCY3/MAP1A/KMT2A/ABL1/NPTN/NF1	14
BP	GO:0051961	negative regulation of nervous system development	21/1397	151/18903	0.00372162	0.0407219	0.0331737	MAP2/SEMA5A/DAAM2/PTN/NFATC4/TMEM98/PTEN/NKX6-1/PTPRS/HES1/SEMA6D/BMPR1A/RYK/KIFAP3/RUFY3/CTNNA1/CTDSP1/NF1/HOOK3/DYNLT1/NOTCH1	21
BP	GO:0051216	cartilage development	26/1397	201/18903	0.00373544	0.0407942	0.0332326	ECM1/PRRX1/FRZB/PTH1R/BGN/MGP/TIMP1/ANXA6/AXIN2/COL27A1/MSX1/MBOAT2/ZEB1/ZBTB16/THRA/BMPR1A/BMP1/LTBP3/EXT2/PKD1/GLG1/TRIP11/SMAD5/DDRGK1/PBXIP1/TGFBR2	26
BP	GO:0071375	cellular response to peptide hormone stimulus	36/1397	306/18903	0.00381623	0.0415961	0.0338859	SLC30A10/EDNRA/MAP1B/MIR145/GPER1/CAV2/CAV1/RARRES2/CA2/IGF2/CYSLTR2/SLC2A4/LPL/PID1/FOXC2/PTK2/NKX6-1/ADCY6/AGT/DDR2/ROCK2/NUCKS1/VAMP2/LEPROT/PTPRA/EIF4EBP2/JAK1/MYO1C/SESN3/SIK2/SLC9A1/PIK3CA/AP3S1/PRKDC/NCOA2/PRKAA1	36
BP	GO:0000041	transition metal ion transport	16/1397	104/18903	0.00395166	0.0429895	0.035021	SLC30A10/TRPC3/TRPC6/TRPC4/TRPC1/SLC39A13/SLC22A17/PGRMC2/CYBRD1/RAB11B/SLC39A7/SLC40A1/COX17/CLTC/ARHGAP1/ISCU	16
BP	GO:0060348	bone development	29/1397	233/18903	0.00402007	0.0435319	0.0354628	ECM1/RANBP3L/FOXC1/PLS3/BGN/FLNA/ANXA6/PAPSS2/AXIN2/COL27A1/MSX1/DDR2/MAP2K6/ZBTB16/TMEM38B/SBDS/PPIB/FOXP1/ANXA2/LTBP3/EXT2/GLG1/VKORC1/BBX/NAB1/TRIP11/SMAD5/TGFBR2/RHOA	29
BP	GO:0060560	developmental growth involved in morphogenesis	29/1397	233/18903	0.00402007	0.0435319	0.0354628	MAP2/FN1/LAMB2/EDNRA/SEMA5A/MAP1B/CTTN/SIX1/NDN/TBX2/VCL/NKX6-1/YAP1/FGF1/PTPRS/ITGB1/MAGI2/NKD1/APP/SEMA6D/IQGAP1/RAPH1/RYK/RUFY3/MACF1/ABL1/DPYSL2/TGFBR2/NOTCH1	29
BP	GO:1990874	vascular associated smooth muscle cell proliferation	15/1397	95/18903	0.00402813	0.0435319	0.0354628	GPER1/PRKG1/IGFBP5/PTEN/TPM1/AGT/EFEMP2/DDR2/NDRG2/CDKN1B/BMPR1A/ADAMTS1/LDLRAP1/NF1/RHOA	15
BP	GO:0097237	cellular response to toxic substance	18/1397	123/18903	0.0040323	0.0435319	0.0354628	GPX3/SOD3/NQO1/MGST3/GSTP1/ADH5/ESD/PRDX2/PARK7/PRDX4/TXN/CAT/GSTK1/GSTT1/PRDX5/SOD1/GSTO1/RDH11	18
BP	GO:0060323	head morphogenesis	8/1397	36/18903	0.00408242	0.043989	0.0358352	LEF1/RRAS/MSX1/SGPL1/CRISPLD2/ATP6AP2/SSBP3/ASPH	8
BP	GO:0052548	regulation of endopeptidase activity	47/1397	428/18903	0.00416871	0.0448334	0.0365231	F3/TFPI/COL4A3/GPER1/DLC1/ITIH5/UACA/TIMP3/TIMP1/SERPINI1/SERPING1/AGT/CRIM1/THBS1/NDUFA13/ROCK2/PEBP1/HIP1/SH3RF1/FYN/IFI6/APP/FAM162A/PARK7/GAPDH/PROS1/BAD/LAMTOR5/PSME1/ANXA2/APLP2/PDCD5/PRDX5/GPI/HDAC1/FIS1/CAST/RPS27L/IFT57/CDKN2D/SERPINB6/GSN/ASPH/PDCD6/PSMF1/MGMT/RHOA	47
BP	GO:1901653	cellular response to peptide	42/1397	373/18903	0.00420827	0.045173	0.0367998	SLC30A10/EDNRA/MAP1B/MIR145/GPER1/CAV2/CAV1/RARRES2/CA2/IGF2/CYSLTR2/SLC2A4/LPL/PID1/FOXC2/PTK2/CACNA2D1/VIM/NKX6-1/ADCY6/AGT/LRP1/DDR2/ROCK2/NUCKS1/VAMP2/LEPROT/FYN/APP/PTPRA/EIF4EBP2/JAK1/MYO1C/SESN3/CHMP5/SIK2/SLC9A1/PIK3CA/AP3S1/PRKDC/NCOA2/PRKAA1	42
BP	GO:0051496	positive regulation of stress fiber assembly	10/1397	52/18903	0.00426625	0.0456392	0.0371795	FERMT2/TPM1/ROCK2/SORBS3/PFN2/ITGB1BP1/RHOC/ABL1/CDC42/RHOA	10
BP	GO:0051701	biological process involved in interaction with host	26/1397	203/18903	0.00426783	0.0456392	0.0371795	EGFR/CAV2/CAV1/SLC20A2/IFITM1/IFITM3/ANPEP/BSG/LGALS1/DAG1/ITGB1/EPHA2/IFITM2/CD46/CHMP5/ITGB5/SIVA1/SCARB2/CHMP2A/CD81/AXL/THOC2/GSN/IFIT1/LY6E/DYNLT1	26
BP	GO:0021762	substantia nigra development	9/1397	44/18903	0.00428893	0.045692	0.0372226	CALM2/NDRG2/DYNLL1/YWHAQ/ACTB/COX6B1/CDC42/NDUFS3/RHOA	9
BP	GO:0090317	negative regulation of intracellular protein transport	9/1397	44/18903	0.00428893	0.045692	0.0372226	PKIG/ANGPT1/PARK7/ITGB1BP1/TXN/ERLEC1/LMAN1/SVIP/NF1	9
BP	GO:0048340	paraxial mesoderm morphogenesis	4/1397	10/18903	0.00434362	0.0459287	0.0374154	FOXC1/FOXC2/LEF1/BMPR1A	4
BP	GO:0060947	cardiac vascular smooth muscle cell differentiation	4/1397	10/18903	0.00434362	0.0459287	0.0374154	MIR145/HEY2/GPER1/NOTCH1	4
BP	GO:0062042	regulation of cardiac epithelial to mesenchymal transition	4/1397	10/18903	0.00434362	0.0459287	0.0374154	EMP2/JAG1/TGFBR2/NOTCH1	4
BP	GO:1901203	positive regulation of extracellular matrix assembly	4/1397	10/18903	0.00434362	0.0459287	0.0374154	PHLDB2/DAG1/PHLDB1/EMILIN1	4
BP	GO:0044000	movement in host	24/1397	183/18903	0.00436612	0.0460805	0.037539	EGFR/CAV2/CAV1/SLC20A2/IFITM1/IFITM3/ANPEP/BSG/LGALS1/DAG1/ITGB1/EPHA2/IFITM2/CD46/CHMP5/ITGB5/SIVA1/SCARB2/CHMP2A/CD81/AXL/GSN/LY6E/DYNLT1	24
BP	GO:0032091	negative regulation of protein binding	15/1397	96/18903	0.00445598	0.0469414	0.0382403	MAP2/CAV1/NFATC4/LRPAP1/PARK7/CSNK1E/ITGB1BP1/CAMK1/ACTB/TMBIM6/PIN1/USP33/IFIT1/ATP2A2/STUB1	15
BP	GO:0070972	protein localization to endoplasmic reticulum	13/1397	78/18903	0.00448055	0.0471124	0.0383797	SRP14/BCAP29/SPCS2/KDELR1/SSR3/SPCS1/SEC61G/GPAA1/SRP9/SEC62/RER1/DDRGK1/SEC61B	13
BP	GO:0010232	vascular transport	14/1397	87/18903	0.00450607	0.047118	0.0383842	ATP1A2/SLC6A1/SLC12A2/SLC6A13/SLCO1C1/KCNJ8/ABCC9/SLC2A4/ATP1B2/SLC19A1/SLC16A2/LRP1/SLCO3A1/SLC38A2	14
BP	GO:0014910	regulation of smooth muscle cell migration	14/1397	87/18903	0.00450607	0.047118	0.0383842	PDGFRB/PRKG1/IGFBP5/TPM1/AGT/LRP1/DDR2/SEMA6D/BMPR1A/ABHD2/ADAMTS1/BCL2/NF1/RHOA	14
BP	GO:0150104	transport across blood-brain barrier	14/1397	87/18903	0.00450607	0.047118	0.0383842	ATP1A2/SLC6A1/SLC12A2/SLC6A13/SLCO1C1/KCNJ8/ABCC9/SLC2A4/ATP1B2/SLC19A1/SLC16A2/LRP1/SLCO3A1/SLC38A2	14
BP	GO:0009749	response to glucose	25/1397	194/18903	0.00462663	0.0482894	0.0393385	PRKAA2/COL4A3/GPER1/COL6A2/LPL/SLC12A7/KCNB1/NKX6-1/TXNIP/THBS1/VAMP2/ZBTB20/CDKN1B/BAD/RAB11B/GCLM/HMGN3/PIK3CA/SMAD4/SRI/SIDT2/TGFBR2/PRKAA1/RHOA/RASAL2	25
BP	GO:1900024	regulation of substrate adhesion-dependent cell spreading	11/1397	61/18903	0.00467555	0.0487101	0.0396812	FERMT2/FBLN1/PTK2/ACTN4/FLNA/DOCK1/ITGB1BP1/ILK/ARHGEF7/ABL1/CDC42	11
BP	GO:0007519	skeletal muscle tissue development	22/1397	164/18903	0.0047177	0.0490589	0.0399654	CAV2/CAV1/DMD/IGF2/ITGA7/SIX1/NR2F2/NUPR1/HLF/VAMP5/HEYL/SVIL/MYL6/CFL2/DDX17/BCL2/MYL6B/NF1/BCL9L/NOTCH1/PRKAA1/RHOA	22
BP	GO:0006750	glutathione biosynthetic process	5/1397	16/18903	0.00479811	0.0494406	0.0402763	GGT5/GGT1/SLC7A11/GCLM/HAGH	5
BP	GO:0006828	manganese ion transport	5/1397	16/18903	0.00479811	0.0494406	0.0402763	SLC30A10/TRPC3/TRPC6/TRPC4/TRPC1	5
BP	GO:0010421	hydrogen peroxide-mediated programmed cell death	5/1397	16/18903	0.00479811	0.0494406	0.0402763	PAWR/DDR2/PARK7/ABL1/PDCD10	5
BP	GO:0051014	actin filament severing	5/1397	16/18903	0.00479811	0.0494406	0.0402763	SVIL/MYH9/DSTN/CFL2/GSN	5
BP	GO:0097428	protein maturation by iron-sulfur cluster transfer	5/1397	16/18903	0.00479811	0.0494406	0.0402763	GLRX5/BOLA3/ISCA1/NFU1/CISD3	5
BP	GO:0006898	receptor-mediated endocytosis	31/1397	257/18903	0.00481304	0.0495043	0.0403282	SGIP1/CAV2/CAV1/CTTN/CD9/IGF2R/CD63/ANGPT1/PLA2R1/ITGB1/LRP1/HIP1/MAGI2/ITSN1/LRPAP1/WDR54/PDLIM7/AP2M1/ATAD1/WASL/SCARB2/LMBRD1/MTMR2/LDLRAP1/ANXA2/CD81/AP2A1/ARF1/HNRNPK/CLTC/TGFBR2	31
CC	GO:0005925	focal adhesion	105/1446	422/19869	5.96087e-30	3.02613e-27	2.27324e-27	CNN3/NFASC/FHL2/RND3/TNS1/PHLDB2/ITGA1/PDGFRB/EGFR/CAV2/CAV1/DLC1/SNTB1/TSPAN4/PARVA/CTTN/MCAM/CD9/PPFIBP1/CSRP2/AJUBA/FERMT2/SYNE2/CSPG4/TGFB1I1/BSG/VCL/CD151/PTK2/NCKAP1/ACTN4/TSPAN9/IGF2R/FLNA/VIM/ANXA6/RRAS/PDLIM1/SVIL/LIMA1/CD59/DAG1/ITGB1/MYH9/NEXN/LRP1/DDR2/SYNPO2/AHNAK/CDC42EP1/FHL1/FAT1/SLC9A3R2/PDLIM7/DST/PPP1R12A/SORBS3/MPRIP/PTPRA/EPHA2/JAK1/RSU1/PACSIN2/AKAP12/CD46/TRIP6/TPM4/IQGAP1/…	105
CC	GO:0030055	cell-substrate junction	106/1446	432/19869	1.12309e-29	3.02613e-27	2.27324e-27	CNN3/NFASC/FHL2/RND3/TNS1/PHLDB2/ITGA1/PDGFRB/EGFR/CAV2/CAV1/DMD/DLC1/SNTB1/TSPAN4/PARVA/CTTN/MCAM/CD9/PPFIBP1/CSRP2/AJUBA/FERMT2/SYNE2/CSPG4/TGFB1I1/BSG/VCL/CD151/PTK2/NCKAP1/ACTN4/TSPAN9/IGF2R/FLNA/VIM/ANXA6/RRAS/PDLIM1/SVIL/LIMA1/CD59/DAG1/ITGB1/MYH9/NEXN/LRP1/DDR2/SYNPO2/AHNAK/CDC42EP1/FHL1/FAT1/SLC9A3R2/PDLIM7/DST/PPP1R12A/SORBS3/MPRIP/PTPRA/EPHA2/JAK1/RSU1/PACSIN2/AKAP12/CD46/TRIP6/TPM4/IQG…	106
CC	GO:0098803	respiratory chain complex	47/1446	91/19869	1.36108e-29	3.02613e-27	2.27324e-27	NDUFA4L2/COX4I2/COX7A1/COX6C/NDUFB7/COX5B/NDUFA13/COX6A1/COX7A2/NDUFB10/COX8A/NDUFA1/NDUFB9/COX7B/NDUFC1/NDUFB2/NDUFC2/NDUFA12/CYC1/NDUFS4/NDUFB4/NDUFB6/NDUFAB1/UQCRQ/SDHD/NDUFA11/NDUFS7/UQCRC1/NDUFA5/NDUFA6/NDUFB1/NDUFA8/NDUFS5/NDUFB3/UQCR10/NDUFS6/NDUFS1/NDUFB11/NDUFS8/COX6B1/NDUFV2/COX7C/NDUFA3/UQCRC2/NDUFB5/NDUFS3/UQCRH	47
CC	GO:0005746	mitochondrial respirasome	47/1446	94/19869	9.07503e-29	1.51326e-26	1.13677e-26	NDUFA4L2/COX4I2/COX7A1/COX6C/NDUFB7/COX5B/NDUFA13/COX6A1/COX7A2/NDUFB10/COX8A/NDUFA1/NDUFB9/COX7B/NDUFC1/NDUFB2/NDUFC2/NDUFA12/CYC1/NDUFS4/NDUFB4/NDUFB6/NDUFAB1/UQCRQ/SDHD/NDUFA11/NDUFS7/UQCRC1/NDUFA5/NDUFA6/NDUFB1/NDUFA8/NDUFS5/NDUFB3/UQCR10/NDUFS6/NDUFS1/NDUFB11/NDUFS8/COX6B1/NDUFV2/COX7C/NDUFA3/UQCRC2/NDUFB5/NDUFS3/UQCRH	47
CC	GO:0070469	respirasome	48/1446	101/19869	4.55572e-28	6.07732e-26	4.56531e-26	NDUFA4L2/COX4I2/COX7A1/COX6C/NDUFB7/COX5B/NDUFA13/COX6A1/COX7A2/NDUFB10/COX8A/NDUFA1/NDUFB9/COX7B/NDUFC1/NDUFB2/NDUFC2/NDUFA12/CYC1/NDUFS4/NDUFB4/NDUFB6/NDUFAB1/UQCRQ/SDHD/NDUFA11/NDUFS7/UQCRC1/NDUFA5/NDUFA6/NDUFB1/NDUFA8/NDUFS5/NDUFB3/UQCR10/NDUFS6/HIGD1A/NDUFS1/NDUFB11/NDUFS8/COX6B1/NDUFV2/COX7C/NDUFA3/UQCRC2/NDUFB5/NDUFS3/UQCRH	48
CC	GO:0098798	mitochondrial protein-containing complex	77/1446	295/19869	1.24914e-23	1.38863e-21	1.04314e-21	NDUFA4L2/COX4I2/COX7A1/COX6C/NDUFB7/COX5B/NDUFA13/COX6A1/COX7A2/NDUFB10/COX8A/NDUFA1/NDUFB9/COX7B/NDUFC1/SLC25A4/NDUFB2/NDUFC2/SUCLG1/NDUFA12/CYC1/MRPL33/NDUFS4/NDUFB4/NDUFB6/MICU3/NDUFAB1/DNAJC15/UQCRQ/SDHD/NDUFA11/NDUFS7/PDHB/UQCRC1/NDUFA5/NDUFA6/MRPL43/NDUFB1/NDUFA8/NDUFS5/NDUFB3/UQCR10/DNAJC19/MRPL41/NDUFS6/NDUFS1/MRPS36/MRPL40/GADD45GIP1/NDUFB11/NDUFS8/MRPL51/AURKAIP1/COX6B1/MRPL2/NDUFV2/MRP…	77
CC	GO:0098800	inner mitochondrial membrane protein complex	52/1446	158/19869	2.85608e-21	2.72144e-19	2.04435e-19	NDUFA4L2/COX4I2/COX7A1/COX6C/NDUFB7/COX5B/NDUFA13/COX6A1/COX7A2/NDUFB10/COX8A/NDUFA1/NDUFB9/COX7B/NDUFC1/NDUFB2/NDUFC2/NDUFA12/CYC1/NDUFS4/NDUFB4/NDUFB6/MICU3/NDUFAB1/DNAJC15/UQCRQ/SDHD/NDUFA11/NDUFS7/UQCRC1/NDUFA5/NDUFA6/NDUFB1/NDUFA8/NDUFS5/NDUFB3/UQCR10/DNAJC19/NDUFS6/NDUFS1/NDUFB11/NDUFS8/COX6B1/NDUFV2/COX7C/NDUFA3/UQCRC2/NDUFB5/NDUFS3/CHCHD10/UQCRH/ROMO1	52
CC	GO:0005747	mitochondrial respiratory chain complex I	29/1446	49/19869	5.17826e-21	3.4539e-19	2.59458e-19	NDUFB7/NDUFA13/NDUFB10/NDUFA1/NDUFB9/NDUFC1/NDUFB2/NDUFC2/NDUFA12/NDUFS4/NDUFB4/NDUFB6/NDUFAB1/NDUFA11/NDUFS7/NDUFA5/NDUFA6/NDUFB1/NDUFA8/NDUFS5/NDUFB3/NDUFS6/NDUFS1/NDUFB11/NDUFS8/NDUFV2/NDUFA3/NDUFB5/NDUFS3	29
CC	GO:0030964	NADH dehydrogenase complex	29/1446	49/19869	5.17826e-21	3.4539e-19	2.59458e-19	NDUFB7/NDUFA13/NDUFB10/NDUFA1/NDUFB9/NDUFC1/NDUFB2/NDUFC2/NDUFA12/NDUFS4/NDUFB4/NDUFB6/NDUFAB1/NDUFA11/NDUFS7/NDUFA5/NDUFA6/NDUFB1/NDUFA8/NDUFS5/NDUFB3/NDUFS6/NDUFS1/NDUFB11/NDUFS8/NDUFV2/NDUFA3/NDUFB5/NDUFS3	29
CC	GO:0045271	respiratory chain complex I	29/1446	49/19869	5.17826e-21	3.4539e-19	2.59458e-19	NDUFB7/NDUFA13/NDUFB10/NDUFA1/NDUFB9/NDUFC1/NDUFB2/NDUFC2/NDUFA12/NDUFS4/NDUFB4/NDUFB6/NDUFAB1/NDUFA11/NDUFS7/NDUFA5/NDUFA6/NDUFB1/NDUFA8/NDUFS5/NDUFB3/NDUFS6/NDUFS1/NDUFB11/NDUFS8/NDUFV2/NDUFA3/NDUFB5/NDUFS3	29
CC	GO:1990204	oxidoreductase complex	44/1446	125/19869	1.68543e-19	1.02198e-17	7.67715e-18	NDUFB7/CYB5R3/NDUFA13/NDUFB10/NDUFA1/NDUFB9/NDUFC1/NDUFB2/NDUFC2/NDUFA12/CYC1/LDHB/NDUFS4/NDUFB4/NDUFB6/NDUFAB1/UQCRQ/SDHD/NDUFA11/NDUFS7/PDHB/UQCRC1/NDUFA5/NDUFA6/NDUFB1/NDUFA8/NDUFS5/NDUFB3/UQCR10/NDUFS6/NDUFS1/MRPS36/CAT/GCSH/NDUFB11/ETFB/NDUFS8/NDUFV2/NDUFA3/IDH3G/UQCRC2/NDUFB5/NDUFS3/UQCRH	44
CC	GO:0005743	mitochondrial inner membrane	94/1446	498/19869	6.53856e-18	3.63435e-16	2.73013e-16	EFHD1/NDUFA4L2/COX4I2/COX7A1/PRODH/PDE2A/COX6C/CKMT2/NDUFB7/COX5B/NDUFA13/COX6A1/COX7A2/NDUFB10/COX8A/NDUFA1/NDUFB9/COX7B/NDUFC1/SLC25A4/NDUFB2/IFI6/NDUFC2/NDUFA12/CYC1/LDHB/MRPL33/LGALS3/NDUFS4/NDUFB4/NDUFB6/MICU3/NDUFAB1/DNAJC15/UQCRQ/SDHD/NDUFA11/NDUFS7/UQCRC1/NDUFA5/NDUFA6/NDUFAF3/MRPL43/NDUFB1/NDUFA8/PSEN2/CYP2U1/NDUFS5/NDUFB3/UQCR10/DNAJC19/MRPL41/NDUFS6/HIGD1A/NDUFS1/MRPS36/COX11/TMEM14C/M…	94
CC	GO:0062023	collagen-containing extracellular matrix	82/1446	433/19869	7.39235e-16	3.79284e-14	2.8492e-14	AGRN/TINAGL1/F3/ECM1/LAMC1/PRELP/NID1/COL5A2/FN1/COL4A4/COL4A3/LAMB2/IGFBP7/SPARCL1/EDIL3/SPARC/COL9A1/LAMA4/LAMA2/SMOC2/COL1A2/RARRES2/MXRA5/BGN/COL14A1/ECM2/LAMC3/ITIH5/MGP/LUM/DCN/NTN4/GPC5/COL4A1/COL4A2/CSPG4/MFGE8/TGFB1I1/ANGPTL4/COL5A3/TIMP3/LGALS1/FBLN1/COL6A1/COL6A2/CD151/PCOLCE/CCDC80/LGALS3BP/BCAM/TIMP1/SOD3/ANXA6/SERPING1/MXRA7/AGT/ANGPT1/DAG1/EFEMP2/THBS1/COL27A1/S100A6/SDC3/ACTA2/ADA…	82
CC	GO:0043292	contractile fiber	57/1446	242/19869	1.22047e-15	5.81468e-14	4.36801e-14	SPTBN1/FHL2/TTN/FHL5/CALD1/DMD/PDLIM2/TPM2/NEBL/PARVA/CACNA1C/KCNJ8/ABCC9/CSRP2/FERMT2/SYNE2/SYNM/MYL9/HRC/VCL/ACTN4/FLNA/TPM1/PDLIM1/ARHGEF25/SVIL/DAG1/CALM2/ALDOA/NEXN/SYNPO2/AHNAK/FBXO32/SYNE1/ACTA2/LMOD1/PDLIM7/DST/PPP1R12A/MYL12A/TPM4/CFL2/ACTN1/MYL12B/SORBS2/ACTG1/PSEN2/ILK/PPP1R12B/JUP/ARF1/LMAN1/MYL6B/SRI/TMOD3/STUB1/PDLIM5	57
CC	GO:0030016	myofibril	55/1446	233/19869	3.50277e-15	1.55757e-13	1.17005e-13	SPTBN1/FHL2/TTN/FHL5/CALD1/DMD/PDLIM2/TPM2/NEBL/PARVA/CACNA1C/KCNJ8/ABCC9/CSRP2/FERMT2/SYNE2/SYNM/MYL9/HRC/VCL/ACTN4/FLNA/TPM1/PDLIM1/ARHGEF25/SVIL/DAG1/CALM2/ALDOA/NEXN/SYNPO2/AHNAK/FBXO32/SYNE1/LMOD1/PDLIM7/DST/PPP1R12A/MYL12A/TPM4/CFL2/ACTN1/MYL12B/SORBS2/ACTG1/PSEN2/ILK/PPP1R12B/JUP/ARF1/LMAN1/SRI/TMOD3/STUB1/PDLIM5	55
CC	GO:0031252	cell leading edge	74/1446	421/19869	9.90986e-13	4.13117e-11	3.10335e-11	CDC42BPA/SPTBN1/PHLDB2/MYLK/APBB2/PTPRK/GPER1/EGFR/SGCE/GABRE/DLC1/PLCE1/PARVA/CTTN/EPS8/KITLG/TESC/AJUBA/FERMT2/SYNE2/CSPG4/GABBR1/LDB2/CYTH3/NCKAP1/KCNB1/TPM1/MYO6/VIM/PTPN13/LIMA1/DAG1/ITGB1/MYH9/RASGRP2/S100A6/MYH10/CADM4/MCC/ITSN1/ACTA2/FAT1/SH3RF1/PDLIM7/DST/APP/PLEKHH2/EPHA2/MYO1C/PACSIN2/ITGB1BP1/IQGAP1/ACTN1/SORBS2/WASL/ILK/RAPH1/ACTB/ATP6AP2/RUFY3/SLC9A1/MACF1/CTNNA1/TLN1/ARHGEF7/STX2/A…	74
CC	GO:0032432	actin filament bundle	27/1446	79/19869	3.73308e-12	1.46468e-10	1.10028e-10	MYLK/PLS3/PDLIM2/NEBL/FERMT2/MYL9/PTK2/ACTN4/FLNA/TPM1/PDLIM1/LIMA1/MYH9/MYH10/SYNPO2/ACTA2/PDLIM7/MYL12A/TRIP6/TPM4/ACTN1/MYL12B/ILK/CNN2/ZYX/LPP/PDLIM5	27
CC	GO:0030017	sarcomere	47/1446	214/19869	5.68581e-12	2.10691e-10	1.58272e-10	SPTBN1/FHL2/TTN/FHL5/DMD/PDLIM2/TPM2/NEBL/PARVA/CACNA1C/ABCC9/CSRP2/FERMT2/SYNE2/MYL9/HRC/ACTN4/FLNA/TPM1/PDLIM1/ARHGEF25/CALM2/ALDOA/NEXN/SYNPO2/FBXO32/SYNE1/LMOD1/PDLIM7/DST/PPP1R12A/MYL12A/TPM4/CFL2/ACTN1/MYL12B/SORBS2/PSEN2/ILK/PPP1R12B/JUP/ARF1/LMAN1/SRI/TMOD3/STUB1/PDLIM5	47
CC	GO:0001725	stress fiber	25/1446	70/19869	7.65107e-12	2.55163e-10	1.91679e-10	MYLK/PDLIM2/NEBL/FERMT2/MYL9/PTK2/ACTN4/TPM1/PDLIM1/LIMA1/MYH9/MYH10/SYNPO2/ACTA2/PDLIM7/MYL12A/TRIP6/TPM4/ACTN1/MYL12B/ILK/CNN2/ZYX/LPP/PDLIM5	25
CC	GO:0097517	contractile actin filament bundle	25/1446	70/19869	7.65107e-12	2.55163e-10	1.91679e-10	MYLK/PDLIM2/NEBL/FERMT2/MYL9/PTK2/ACTN4/TPM1/PDLIM1/LIMA1/MYH9/MYH10/SYNPO2/ACTA2/PDLIM7/MYL12A/TRIP6/TPM4/ACTN1/MYL12B/ILK/CNN2/ZYX/LPP/PDLIM5	25
CC	GO:0042641	actomyosin	26/1446	78/19869	1.78923e-11	5.68295e-10	4.26905e-10	CDC42BPA/MYLK/PDLIM2/NEBL/FERMT2/MYL9/PTK2/ACTN4/TPM1/PDLIM1/LIMA1/MYH9/MYH10/SYNPO2/ACTA2/PDLIM7/MYL12A/TRIP6/TPM4/ACTN1/MYL12B/ILK/CNN2/ZYX/LPP/PDLIM5	26
CC	GO:0005912	adherens junction	40/1446	179/19869	1.22209e-10	3.70516e-09	2.78333e-09	CNN3/CDH6/PTPRK/TMEM47/PDLIM2/PARD3/ESAM/LIN7A/AJUBA/FERMT2/TJP1/SYNM/TMEM204/CDH11/VCL/CYTH3/CDC42EP4/WTIP/JAG1/PDLIM1/DAG1/MYH9/TNKS1BP1/NEXN/CDC42EP1/PDLIM7/PARK7/ADD1/ACTB/ANXA2/JUP/CTNNA1/ZYX/TLN1/MAGI1/CCDC85B/TMOD3/ABI2/NOTCH1/PDLIM5	40
CC	GO:0031674	I band	34/1446	143/19869	5.22887e-10	1.51637e-08	1.1391e-08	FHL2/TTN/FHL5/DMD/PDLIM2/NEBL/PARVA/CACNA1C/CSRP2/FERMT2/SYNE2/MYL9/HRC/ACTN4/FLNA/PDLIM1/ALDOA/NEXN/SYNPO2/FBXO32/PDLIM7/DST/PPP1R12A/MYL12A/CFL2/ACTN1/MYL12B/SORBS2/PSEN2/PPP1R12B/JUP/SRI/STUB1/PDLIM5	34
CC	GO:0030018	Z disc	32/1446	130/19869	6.55992e-10	1.82311e-08	1.36953e-08	FHL2/TTN/FHL5/DMD/PDLIM2/NEBL/PARVA/CACNA1C/CSRP2/SYNE2/MYL9/HRC/ACTN4/FLNA/PDLIM1/NEXN/SYNPO2/FBXO32/PDLIM7/DST/PPP1R12A/MYL12A/CFL2/ACTN1/MYL12B/SORBS2/PSEN2/PPP1R12B/JUP/SRI/STUB1/PDLIM5	32
CC	GO:0005604	basement membrane	27/1446	99/19869	1.23574e-09	3.29694e-08	2.47667e-08	AGRN/LAMC1/NID1/FN1/COL4A4/COL4A3/LAMB2/SPARC/COL9A1/LAMA4/LAMA2/SMOC2/LAMC3/NTN4/COL4A1/COL4A2/TIMP3/FBLN1/CD151/CCDC80/TIMP1/DAG1/EFEMP2/ACTA2/DST/ADAMTS1/ANXA2	27
CC	GO:0070069	cytochrome complex	17/1446	42/19869	1.81639e-09	4.65974e-08	3.50041e-08	NDUFA4L2/COX4I2/COX7A1/COX6C/COX5B/COX6A1/COX7A2/COX8A/COX7B/CYC1/UQCRQ/UQCRC1/UQCR10/COX6B1/COX7C/UQCRC2/UQCRH	17
CC	GO:1990351	transporter complex	64/1446	405/19869	3.13627e-09	7.74775e-08	5.82014e-08	CACHD1/ATP1A2/KCNS3/TRPC3/GABRE/TRPC6/CACNA1C/EPS8/KCNJ8/ABCC9/TRPC4/ATP1B2/HCN2/CNGA1/KCNB1/CACNA2D1/FXYD1/NDUFB7/HSPA2/CALM2/NDUFA13/ANO6/NDUFB10/NDUFA1/CLIC4/NDUFB9/TRPC1/NDUFC1/NDUFB2/NDUFC2/NDUFA12/CYC1/PDE4D/NDUFS4/NDUFB4/NDUFB6/MICU3/NDUFAB1/UQCRQ/NDUFA11/NDUFS7/UQCRC1/NDUFA5/NDUFA6/NDUFB1/NDUFA8/NDUFS5/NDUFB3/UQCR10/NDUFS6/NDUFS1/NDUFB11/SLC9A1/NDUFS8/ATP10D/PKD1/NDUFV2/NDUFA3/TIMM8B/UQCR…	64
CC	GO:1902495	transmembrane transporter complex	61/1446	379/19869	3.59261e-09	8.55811e-08	6.42888e-08	CACHD1/ATP1A2/KCNS3/TRPC3/GABRE/TRPC6/CACNA1C/EPS8/KCNJ8/ABCC9/TRPC4/ATP1B2/HCN2/CNGA1/KCNB1/CACNA2D1/FXYD1/NDUFB7/HSPA2/CALM2/NDUFA13/ANO6/NDUFB10/NDUFA1/CLIC4/NDUFB9/TRPC1/NDUFC1/NDUFB2/NDUFC2/NDUFA12/CYC1/PDE4D/NDUFS4/NDUFB4/NDUFB6/MICU3/NDUFAB1/UQCRQ/NDUFA11/NDUFS7/UQCRC1/NDUFA5/NDUFA6/NDUFB1/NDUFA8/NDUFS5/NDUFB3/UQCR10/NDUFS6/NDUFS1/NDUFB11/SLC9A1/NDUFS8/PKD1/NDUFV2/NDUFA3/UQCRC2/NDUFB5/NDUF…	61
CC	GO:0030027	lamellipodium	40/1446	203/19869	6.12916e-09	1.40971e-07	1.05898e-07	CDC42BPA/MYLK/APBB2/PLCE1/PARVA/CTTN/KITLG/TESC/AJUBA/FERMT2/SYNE2/CSPG4/NCKAP1/PTPN13/DAG1/ITGB1/MYH10/MCC/ITSN1/ACTA2/FAT1/SH3RF1/APP/PLEKHH2/EPHA2/ITGB1BP1/SORBS2/WASL/ILK/RAPH1/ACTB/RUFY3/SLC9A1/CTNNA1/ARHGEF7/STX2/PIK3CA/GSN/ABI2/RHOA	40
CC	GO:0005938	cell cortex	52/1446	312/19869	1.55429e-08	3.45571e-07	2.59594e-07	SPTBN1/RND3/PHLDB2/CAV1/CALD1/DMD/DLC1/PDLIM2/PARD3/CTTN/EPS8/FRY/TRPC4/FERMT2/CRIP2/MYL9/PTK2/ACTN4/FLNA/UTRN/MYO6/PARD6G/FGF1/MYH9/MYH10/GNAI1/DSTN/DST/PLEKHH2/PHLDB1/TRIP10/AKAP12/RHOC/TPM4/IQGAP1/ADD3/ACTN1/MYL12B/WASL/PSEN2/ERC1/ACTB/FRYL/GIPC1/RHOBTB3/ARHGEF7/DYNC1H1/NDFIP1/GSN/ASPH/CAPN2/RHOA	52
CC	GO:0005884	actin filament	27/1446	114/19869	3.37026e-08	7.07894e-07	5.31772e-07	MYO1B/PLS3/PDLIM2/TPM2/CTTN/PAWR/NCKAP1/TPM1/MYO6/SMTN/PDLIM1/SPECC1/JAM3/LMOD1/PDLIM7/FYN/ARHGAP6/MYO1C/TPM4/IQGAP1/ACTN1/WASL/ACTG1/MYO9A/ACTB/EHBP1/PDLIM5	27
CC	GO:0042383	sarcolemma	30/1446	136/19869	3.39619e-08	7.07894e-07	5.31772e-07	ATP1A2/LAMA2/SGCE/CAV2/CAV1/DMD/BGN/SNTB1/CACNA1C/KCNJ8/SYNM/SLC2A4/BSG/COL6A1/COL6A2/VCL/KCNB1/UTRN/SGCA/CACNA2D1/FXYD1/DAG1/ITGB1/SGCB/AHNAK/SLC38A2/SSPN/SLC9A1/ANXA2/SRI	30
CC	GO:0005751	mitochondrial respiratory chain complex IV	12/1446	25/19869	4.49743e-08	9.09027e-07	6.82864e-07	NDUFA4L2/COX4I2/COX7A1/COX6C/COX5B/COX6A1/COX7A2/COX8A/COX7B/COX6B1/COX7C/UQCRC2	12
CC	GO:0045277	respiratory chain complex IV	12/1446	28/19869	2.14173e-07	4.20158e-06	3.15624e-06	NDUFA4L2/COX4I2/COX7A1/COX6C/COX5B/COX6A1/COX7A2/COX8A/COX7B/COX6B1/COX7C/UQCRC2	12
CC	GO:0031941	filamentous actin	12/1446	29/19869	3.41159e-07	6.50151e-06	4.88396e-06	PDLIM2/NCKAP1/MYO6/SMTN/PDLIM1/SPECC1/JAM3/PDLIM7/MYO1C/ACTG1/EHBP1/PDLIM5	12
CC	GO:0031983	vesicle lumen	50/1446	327/19869	4.59022e-07	8.50466e-06	6.38873e-06	ECM1/FN1/SPARC/EGFR/RARRES2/IGF2/TIMP3/VCL/LGALS3BP/ACTN4/TIMP1/SERPINI1/SERPING1/CYB5R3/THBS1/ALDOA/MAGED2/GSTP1/APP/SRP14/CPPED1/PRDX4/PSMB1/A1BG/CRISPLD2/PGAM1/ACTR10/ACTN1/PROS1/CAT/ANXA2/CNN2/SCCPDH/CTSA/JUP/HEBP2/MIF/GPI/XRCC5/DYNC1H1/ACTR1B/NIT2/GSN/PSMC3/XRCC6/DYNLT1/PSMB7/PSMD13/TEX264/NHLRC2	50
CC	GO:0005788	endoplasmic reticulum lumen	48/1446	312/19869	6.46009e-07	1.16456e-05	8.74824e-06	MXRA8/LAMC1/COL5A2/FN1/WNT6/COL4A4/COL4A3/LAMB2/FSTL1/IGFBP7/SPARCL1/COL9A1/COL1A2/COL14A1/COL4A1/COL4A2/MFGE8/COL5A3/HRC/LGALS1/COL6A1/COL6A2/FKBP10/IGFBP5/TIMP1/F10/SERPING1/IGFBP4/P4HA2/DAG1/THBS1/COL27A1/KTN1/LRPAP1/APP/ESD/LTBP1/RCN1/SDC2/RCN2/PPIB/UGGT2/APLP2/GANAB/ERLEC1/CALU/SUMF2/MBTPS1	48
CC	GO:0034774	secretory granule lumen	49/1446	322/19869	6.88851e-07	1.20911e-05	9.08291e-06	ECM1/FN1/SPARC/RARRES2/IGF2/TIMP3/VCL/LGALS3BP/ACTN4/TIMP1/SERPINI1/SERPING1/CYB5R3/THBS1/ALDOA/MAGED2/GSTP1/APP/SRP14/CPPED1/PRDX4/PSMB1/A1BG/CRISPLD2/PGAM1/ACTR10/ACTN1/PROS1/CAT/ANXA2/CNN2/SCCPDH/CTSA/JUP/HEBP2/MIF/GPI/XRCC5/DYNC1H1/ACTR1B/NIT2/GSN/PSMC3/XRCC6/DYNLT1/PSMB7/PSMD13/TEX264/NHLRC2	49
CC	GO:0060205	cytoplasmic vesicle lumen	49/1446	325/19869	9.08858e-07	1.55438e-05	1.16766e-05	ECM1/FN1/SPARC/RARRES2/IGF2/TIMP3/VCL/LGALS3BP/ACTN4/TIMP1/SERPINI1/SERPING1/CYB5R3/THBS1/ALDOA/MAGED2/GSTP1/APP/SRP14/CPPED1/PRDX4/PSMB1/A1BG/CRISPLD2/PGAM1/ACTR10/ACTN1/PROS1/CAT/ANXA2/CNN2/SCCPDH/CTSA/JUP/HEBP2/MIF/GPI/XRCC5/DYNC1H1/ACTR1B/NIT2/GSN/PSMC3/XRCC6/DYNLT1/PSMB7/PSMD13/TEX264/NHLRC2	49
CC	GO:0019774	proteasome core complex, beta-subunit complex	7/1446	11/19869	2.71028e-06	4.51939e-05	3.39498e-05	PSMB1/PSMB6/PSMB2/PSMB4/PSMB3/PSMB5/PSMB7	7
CC	GO:0031970	organelle envelope lumen	21/1446	94/19869	3.02634e-06	4.92334e-05	3.69843e-05	FKBP10/IGF2R/TXNIP/NDUFB7/BLOC1S1/APP/CHCHD2/PARK7/ARL2/NDUFA8/NDUFS5/NDUFS1/CAT/REXO2/SOD1/COX17/TIMM8B/STOML2/CHCHD10/CAPN2/TIMM13	21
CC	GO:0005839	proteasome core complex	9/1446	20/19869	4.49296e-06	7.13525e-05	5.36002e-05	PSMB1/PSMA7/PSMB6/PSMB2/PSMB4/PSMB3/PSMB5/PSMB7/PSMF1	9
CC	GO:1905369	endopeptidase complex	19/1446	82/19869	5.00551e-06	7.76436e-05	5.83262e-05	CFH/PSMB1/PSMA7/PSME1/PSMB6/PIGK/PSMB2/GPAA1/PSMB4/PSMB3/PSMD9/PSMD8/PSMB5/PSMC3/CAPN2/PSMB7/PSMC5/PSMD13/PSMF1	19
CC	GO:0005758	mitochondrial intermembrane space	19/1446	84/19869	7.29461e-06	0.00011058	8.30679e-05	FKBP10/TXNIP/NDUFB7/BLOC1S1/CHCHD2/PARK7/ARL2/NDUFA8/NDUFS5/NDUFS1/CAT/REXO2/SOD1/COX17/TIMM8B/STOML2/CHCHD10/CAPN2/TIMM13	19
CC	GO:0005759	mitochondrial matrix	62/1446	483/19869	8.93915e-06	0.000132498	9.9533e-05	PRODH/PDE2A/GLRX5/BLOC1S1/SUCLG1/MRPL33/PARK7/PCCA/NDUFAB1/DNAJC15/NDUFS7/PDHB/ARL2/MPG/MRPL43/DNAJC19/MRPL41/ACAD10/NDUFS1/MRPS36/MRPL40/BOLA3/GCSH/GADD45GIP1/ACADVL/ETFB/GSTK1/PIN4/NDUFS8/ISCA1/MRPL51/SUCLA2/REXO2/PRDX5/ECI1/AURKAIP1/ALDH7A1/MRPL2/AASS/SOD1/MRPS26/AK3/TUFM/MRPS25/IDH3G/MRPS9/ECHS1/MRPL36/IARS2/VDAC2/METTL17/HAGH/HSD17B10/NDUFS3/ACAT1/MRPS18B/MRPL28/ISCU/MRPS5/NR3C1/MRPS18C/MRPL…	62
CC	GO:0016010	dystrophin-associated glycoprotein complex	8/1446	17/19869	1.03466e-05	0.000150026	0.0001127	SGCE/DMD/SNTB1/UTRN/SGCA/DAG1/SGCB/SSPN	8
CC	GO:0090665	glycoprotein complex	9/1446	22/19869	1.16425e-05	0.000161782	0.000121532	SGCE/DMD/SNTB1/FLNA/UTRN/SGCA/DAG1/SGCB/SSPN	9
CC	GO:0098644	complex of collagen trimers	9/1446	22/19869	1.16425e-05	0.000161782	0.000121532	COL5A2/COL4A4/COL4A3/COL1A2/LUM/COL4A1/COL4A2/COL5A3/COL27A1	9
CC	GO:0000502	proteasome complex	15/1446	59/19869	1.48806e-05	0.000202559	0.000152163	PSMB1/PSMA7/PSME1/PSMB6/PSMB2/PSMB4/PSMB3/PSMD9/PSMD8/PSMB5/PSMC3/PSMB7/PSMC5/PSMD13/PSMF1	15
CC	GO:0031093	platelet alpha granule lumen	16/1446	67/19869	1.8357e-05	0.000244883	0.000183957	FN1/SPARC/IGF2/ACTN4/TIMP1/SERPING1/THBS1/ALDOA/MAGED2/APP/A1BG/ACTN1/PROS1/SCCPDH/TEX264/NHLRC2	16
CC	GO:0031091	platelet alpha granule	19/1446	91/19869	2.4586e-05	0.000321546	0.000241546	FN1/SPARC/IGF2/CD9/ACTN4/TIMP1/SERPING1/PHACTR2/THBS1/ALDOA/MAGED2/APP/A1BG/ACTN1/PROS1/SCCPDH/APLP2/TEX264/NHLRC2	19
CC	GO:1904813	ficolin-1-rich granule lumen	23/1446	124/19869	2.7612e-05	0.000354177	0.000266059	VCL/ALDOA/GSTP1/SRP14/PRDX4/PSMB1/A1BG/CRISPLD2/PGAM1/ACTR10/CAT/JUP/MIF/GPI/ASAH1/ACTR1B/PDAP1/GSN/PSMC3/XRCC6/DYNLT1/PSMB7/PSMD13	23
CC	GO:0005774	vacuolar membrane	58/1446	461/19869	3.10313e-05	0.000390526	0.000293364	ECE1/ENPEP/IFITM1/IFITM3/ANPEP/RNF152/COL6A1/ABCA5/MYO6/CD63/VASN/ANXA6/GNA11/STOM/ITM2C/GNAI1/LRP1/TMEM59/MAP1LC3A/AHNAK/LAPTM4A/BLOC1S1/NDUFC2/AP2M1/IFITM2/ATRAID/SLC22A17/SLC12A4/CHMP5/CALCOCO2/TMEM9/SCARB2/ATP6V1G1/PSEN2/SYNGR1/LAPTM4B/LAMTOR5/RRAGA/LMBRD1/ATP6AP2/CHMP2A/CYBRD1/MTMR2/ANXA2/CPNE3/CTSA/AP2A1/CLN5/RAB2A/TMEM106B/WDFY3/SYT11/CLTC/SIDT2/ATP6V1E1/WDR41/RNF167/TEX264	58
CC	GO:1905368	peptidase complex	22/1446	118/19869	3.77005e-05	0.000465671	0.000349813	F3/CFH/PSMB1/SPCS2/PSMA7/PSME1/PSMB6/PIGK/SPCS1/PSMB2/GPAA1/PSMB4/PSMB3/PSMD9/PSMD8/PSMB5/PSMC3/CAPN2/PSMB7/PSMC5/PSMD13/PSMF1	22
CC	GO:0030667	secretory granule membrane	43/1446	313/19869	4.25089e-05	0.000515517	0.000387258	NFASC/CPE/SPARC/CAV2/CAV1/CD9/MFGE8/ANPEP/CA4/BSG/IGF2R/CD63/PAM/CD38/CYSTM1/PHACTR2/STOM/CD59/PGRMC1/ANO6/VAMP2/NDUFC2/DYNLL1/LGALS3/CD46/IQGAP1/SYNGR1/ATP6AP2/CPNE3/HMOX2/APLP2/ANXA7/SVIP/HVCN1/TMED2/SCAMP1/RAB5B/SERPINB6/ITPR1/TRIP11/SRI/AGPAT2/RHOA	43
CC	GO:0031253	cell projection membrane	46/1446	344/19869	4.59899e-05	0.000547773	0.000411489	MXRA8/SPTBN1/SLC12A2/GPER1/EGFR/SGCE/DMD/GABRE/DLC1/EPS8/TESC/FERMT2/SYNE2/CSPG4/ATP1B2/CA4/SLC19A1/GABBR1/NCKAP1/CNGA1/KCNB1/UTRN/TPM1/MYO6/SLC7A11/LIMA1/ITGB1/RASGRP2/PTCH1/EPHA2/MYO1C/ADCY3/PACSIN2/MFSD10/BBS7/BBS9/ASAP1/ATP6AP2/CYBRD1/MACF1/TLN1/PKD1/GPI/TXNDC15/BBIP1/RHOA	46
CC	GO:0101002	ficolin-1-rich granule	29/1446	185/19869	7.17416e-05	0.000839503	0.000630637	NFASC/VCL/ALDOA/GSTP1/SRP14/DYNLL1/LGALS3/PRDX4/PSMB1/A1BG/CRISPLD2/PGAM1/ACTR10/ATP6AP2/CAT/JUP/MIF/GPI/ASAH1/ACTR1B/PDAP1/SERPINB6/GSN/PSMC3/XRCC6/DYNLT1/PSMB7/PSMD13/RHOA	29
CC	GO:0030863	cortical cytoskeleton	20/1446	108/19869	9.21832e-05	0.00106011	0.000796356	SPTBN1/CALD1/DMD/DLC1/PDLIM2/CTTN/TRPC4/ACTN4/UTRN/MYH9/DSTN/PLEKHH2/TPM4/IQGAP1/ACTN1/WASL/ERC1/ACTB/GSN/CAPN2	20
CC	GO:0005765	lysosomal membrane	52/1446	418/19869	0.000104655	0.00116342	0.000873962	ECE1/ENPEP/IFITM1/IFITM3/ANPEP/RNF152/COL6A1/ABCA5/MYO6/CD63/VASN/ANXA6/GNA11/STOM/ITM2C/GNAI1/LRP1/TMEM59/AHNAK/LAPTM4A/BLOC1S1/NDUFC2/AP2M1/IFITM2/ATRAID/SLC12A4/CHMP5/TMEM9/SCARB2/ATP6V1G1/PSEN2/SYNGR1/LAPTM4B/LAMTOR5/RRAGA/LMBRD1/ATP6AP2/CHMP2A/CYBRD1/ANXA2/CPNE3/CTSA/AP2A1/CLN5/RAB2A/TMEM106B/SYT11/CLTC/SIDT2/ATP6V1E1/WDR41/RNF167	52
CC	GO:0098852	lytic vacuole membrane	52/1446	418/19869	0.000104655	0.00116342	0.000873962	ECE1/ENPEP/IFITM1/IFITM3/ANPEP/RNF152/COL6A1/ABCA5/MYO6/CD63/VASN/ANXA6/GNA11/STOM/ITM2C/GNAI1/LRP1/TMEM59/AHNAK/LAPTM4A/BLOC1S1/NDUFC2/AP2M1/IFITM2/ATRAID/SLC12A4/CHMP5/TMEM9/SCARB2/ATP6V1G1/PSEN2/SYNGR1/LAPTM4B/LAMTOR5/RRAGA/LMBRD1/ATP6AP2/CHMP2A/CYBRD1/ANXA2/CPNE3/CTSA/AP2A1/CLN5/RAB2A/TMEM106B/SYT11/CLTC/SIDT2/ATP6V1E1/WDR41/RNF167	52
CC	GO:0045121	membrane raft	43/1446	326/19869	0.000109892	0.00120161	0.000902652	ATP1A2/TFPI/ITGA1/EGFR/CAV2/CAV1/DMD/DLC1/TRPC4/EMP2/SLC2A4/BSG/EHD2/GABBR1/RFTN1/EDNRB/SGCA/FXYD1/STOM/ANGPT1/DAG1/ITGB1/PTCH1/AHNAK/PRKAR1A/FYN/APP/LDHB/PARK7/MYO1C/PACSIN2/PSEN2/BMPR1A/LAMTOR5/SLC9A1/ANXA2/PPP2R1B/CTNNA1/UNC5B/CBLB/STOML2/TGFBR2/CAPN2	43
CC	GO:0098857	membrane microdomain	43/1446	327/19869	0.000117832	0.00126764	0.000952256	ATP1A2/TFPI/ITGA1/EGFR/CAV2/CAV1/DMD/DLC1/TRPC4/EMP2/SLC2A4/BSG/EHD2/GABBR1/RFTN1/EDNRB/SGCA/FXYD1/STOM/ANGPT1/DAG1/ITGB1/PTCH1/AHNAK/PRKAR1A/FYN/APP/LDHB/PARK7/MYO1C/PACSIN2/PSEN2/BMPR1A/LAMTOR5/SLC9A1/ANXA2/PPP2R1B/CTNNA1/UNC5B/CBLB/STOML2/TGFBR2/CAPN2	43
CC	GO:0005868	cytoplasmic dynein complex	8/1446	23/19869	0.000140583	0.00148839	0.00111809	DYNC1I1/DYNLT3/DYNC2H1/DYNLL1/DYNC1I2/DYNLRB1/DYNC1H1/DYNLT1	8
CC	GO:0098685	Schaffer collateral - CA1 synapse	15/1446	72/19869	0.000176039	0.00183465	0.0013782	CPLX1/CDH11/ADORA2B/GABBR1/ITGB1/FYN/PTPRA/PFN2/AKAP12/ACTG1/SYP/ACTB/GIPC1/NPTN/ITPR1	15
CC	GO:0030864	cortical actin cytoskeleton	16/1446	80/19869	0.000179372	0.00184063	0.00138269	SPTBN1/CALD1/DMD/DLC1/PDLIM2/CTTN/ACTN4/UTRN/MYH9/DSTN/PLEKHH2/IQGAP1/ACTN1/WASL/GSN/CAPN2	16
CC	GO:0002102	podosome	9/1446	30/19869	0.000196696	0.00198081	0.00148799	CTTN/TJP1/VCL/SVIL/TPM4/PTPN12/ASAP1/HNRNPK/GSN	9
CC	GO:0031256	leading edge membrane	27/1446	177/19869	0.000198972	0.00198081	0.00148799	SPTBN1/PTPRK/GPER1/EGFR/SGCE/GABRE/DLC1/EPS8/TESC/FERMT2/SYNE2/CSPG4/GABBR1/NCKAP1/KCNB1/TPM1/MYO6/ITGB1/RASGRP2/EPHA2/MYO1C/PACSIN2/ATP6AP2/MACF1/TLN1/CDC42/RHOA	27
CC	GO:0000313	organellar ribosome	17/1446	89/19869	0.000205107	0.0019827	0.00148941	MRPL33/MRPL43/MRPL41/MRPL40/GADD45GIP1/MRPL51/AURKAIP1/MRPL2/MRPS26/MRPS25/MRPS9/MRPL36/MRPS18B/MRPL28/MRPS5/MRPS18C/MRPL19	17
CC	GO:0005761	mitochondrial ribosome	17/1446	89/19869	0.000205107	0.0019827	0.00148941	MRPL33/MRPL43/MRPL41/MRPL40/GADD45GIP1/MRPL51/AURKAIP1/MRPL2/MRPS26/MRPS25/MRPS9/MRPL36/MRPS18B/MRPL28/MRPS5/MRPS18C/MRPL19	17
CC	GO:0001726	ruffle	27/1446	178/19869	0.000218613	0.00208307	0.00156481	EGFR/DLC1/CTTN/EPS8/TESC/CSPG4/CYTH3/NCKAP1/TPM1/MYO6/LIMA1/ITGB1/MYH9/RASGRP2/S100A6/PDLIM7/EPHA2/MYO1C/PACSIN2/ITGB1BP1/IQGAP1/ACTN1/MACF1/TLN1/ARHGEF7/ABL1/RHOA	27
CC	GO:0005750	mitochondrial respiratory chain complex III	6/1446	14/19869	0.000265176	0.00245657	0.00184538	CYC1/UQCRQ/UQCRC1/UQCR10/UQCRC2/UQCRH	6
CC	GO:0045275	respiratory chain complex III	6/1446	14/19869	0.000265176	0.00245657	0.00184538	CYC1/UQCRQ/UQCRC1/UQCR10/UQCRC2/UQCRH	6
CC	GO:0030175	filopodium	19/1446	108/19869	0.000273757	0.00250131	0.00187899	MYO1B/MAP2/DMD/KITLG/SYNE2/FARP1/UTRN/MYO6/DAG1/ITGB1/ACTA2/FAT1/APP/RAPH1/RUFY3/AP2A1/DYNC1H1/CDC42/ABI2	19
CC	GO:0098636	protein complex involved in cell adhesion	12/1446	52/19869	0.000283245	0.00255303	0.00191784	ITGA10/LAMC1/NID1/LAMB2/ITGA1/LAMA2/ITGA7/LGALS1/ITGB1/JAM3/EMILIN1/ITGB5	12
CC	GO:0005665	RNA polymerase II, core complex	6/1446	15/19869	0.000414804	0.00368899	0.00277119	POLR2L/POLR2F/POLR2I/POLR2C/POLR2G/POLR2J	6
CC	GO:0005581	collagen trimer	16/1446	86/19869	0.00042556	0.00373485	0.00280563	COL5A2/COL4A4/COL4A3/COL9A1/COL1A2/COL14A1/LUM/COL4A1/COL4A2/C1QTNF1/COLEC12/COL5A3/COL6A1/COL6A2/COL27A1/EMILIN1	16
CC	GO:0044291	cell-cell contact zone	14/1446	72/19869	0.000602139	0.00521593	0.00391822	ATP1A2/GJC1/VCL/VAMP5/FXYD1/ITGB1/CADM4/AHNAK/JAM3/ACTN1/SLC9A1/JUP/CTNNA1/PIK3CA	14
CC	GO:0043034	costamere	6/1446	16/19869	0.000622968	0.00532717	0.00400179	DMD/SYNM/VCL/SVIL/DAG1/AHNAK	6
CC	GO:0016529	sarcoplasmic reticulum	14/1446	73/19869	0.000695933	0.00587579	0.00441392	SYNE2/SLC2A4/HRC/CACNA2D1/THBS1/TMEM109/TMEM38B/CAMK2G/CALU/ITPR1/REEP5/SRI/ATP2A2/ASPH	14
CC	GO:0014704	intercalated disc	11/1446	50/19869	0.000775837	0.00646854	0.00485919	ATP1A2/GJC1/VCL/VAMP5/FXYD1/ITGB1/ACTN1/SLC9A1/JUP/CTNNA1/PIK3CA	11
CC	GO:0005869	dynactin complex	6/1446	17/19869	0.000903789	0.00744231	0.00559069	ACTA2/DCTN2/DCTN3/ACTR10/DCTN6/ACTR1B	6
CC	GO:0005583	fibrillar collagen trimer	5/1446	12/19869	0.00104089	0.00836476	0.00628364	COL5A2/COL1A2/LUM/COL5A3/COL27A1	5
CC	GO:0098643	banded collagen fibril	5/1446	12/19869	0.00104089	0.00836476	0.00628364	COL5A2/COL1A2/LUM/COL5A3/COL27A1	5
CC	GO:0005903	brush border	17/1446	102/19869	0.00105972	0.00841471	0.00632116	MYO1B/ENPEP/EPS8/CA4/SLC19A1/FLNA/SLC7A11/LIMA1/MYH9/MYL6/MYO1C/SLC38A2/MFSD10/ADD3/ACTN1/MYL12B/CYBRD1	17
CC	GO:0090533	cation-transporting ATPase complex	6/1446	18/19869	0.00127276	0.00998744	0.0075026	ATP1A2/KCNJ8/ABCC9/ATP1B2/FXYD1/SLC9A1	6
CC	GO:0032154	cleavage furrow	11/1446	54/19869	0.00152114	0.0117977	0.00886245	MYLK/SVIL/LIMA1/ITGB1/MYH9/MYH10/DCTN3/RHOC/PPP1CC/WDR73/RHOA	11
CC	GO:0019897	extrinsic component of plasma membrane	24/1446	172/19869	0.00157753	0.0120944	0.00908536	CDH6/GNG11/CAV2/FERMT2/MFGE8/CDH11/GNG4/CYTH3/GNG12/SYTL2/PTK2/FARP1/GNA11/S100A6/GNAI1/HIP1/FYN/IQGAP1/PLEKHA4/ANXA2/JUP/CTNNA1/STOML2/RHOA	24
CC	GO:0005796	Golgi lumen	17/1446	106/19869	0.00163799	0.0124152	0.00932635	AGRN/PRELP/WNT6/BGN/LUM/DCN/GPC5/CSPG4/SOD3/F10/DAG1/SDC3/LRPAP1/APP/GOLIM4/PROS1/SDC2	17
CC	GO:0016528	sarcoplasm	15/1446	89/19869	0.00181667	0.0135793	0.0102008	SYNE2/SLC2A4/HRC/CACNA2D1/THBS1/TMEM109/TMEM38B/CAMK2G/CALU/ITPR1/REEP5/SRI/GSN/ATP2A2/ASPH	15
CC	GO:0043202	lysosomal lumen	16/1446	98/19869	0.00183228	0.0135793	0.0102008	AGRN/PRELP/PDGFRB/EPDR1/BGN/LUM/DCN/GPC5/CSPG4/SDC3/CTSF/SDC2/SCARB2/CTSA/ASAH1/CHID1	16
CC	GO:0031234	extrinsic component of cytoplasmic side of plasma membrane	16/1446	99/19869	0.00204104	0.0147865	0.0111076	GNG11/CAV2/FERMT2/GNG4/CYTH3/GNG12/PTK2/FARP1/GNA11/S100A6/GNAI1/HIP1/FYN/IQGAP1/PLEKHA4/RHOA	16
CC	GO:0016460	myosin II complex	7/1446	26/19869	0.00204794	0.0147865	0.0111076	MYL9/MYH9/MYL6/MYH10/MYL12A/MYL12B/MYL6B	7
CC	GO:0016459	myosin complex	11/1446	56/19869	0.00207034	0.0147865	0.0111076	MYO1B/MYL9/MYO6/MYH9/MYL6/MYH10/MYL12A/MYO1C/MYL12B/MYO9A/MYL6B	11
CC	GO:0140534	endoplasmic reticulum protein-containing complex	19/1446	127/19869	0.00208385	0.0147865	0.0111076	DAD1/EMC2/SPCS2/KRTCAP2/EMC7/PIGK/HSD17B12/PPIB/FAM8A1/SPCS1/PIGP/SEC61G/GPAA1/EXT2/GANAB/SPTSSA/SRP9/EMC4/SEC61B	19
CC	GO:0005875	microtubule associated complex	23/1446	166/19869	0.00214222	0.0150407	0.0112986	MAP2/MAP1B/DYNC1I1/KIF5C/DYNLT3/ACTA2/DYNC2H1/DYNLL1/DCTN2/DCTN3/ACTR10/KIF13A/DYNC1I2/DYNLRB1/MAP1A/KIFAP3/MAP4/DYNC1H1/DCTN6/ACTR1B/RABGAP1/KIF3A/DYNLT1	23
CC	GO:0098637	protein complex involved in cell-matrix adhesion	5/1446	14/19869	0.00232684	0.0161667	0.0121445	LAMC1/NID1/LAMB2/LAMA2/EMILIN1	5
CC	GO:0045177	apical part of cell	48/1446	435/19869	0.00259256	0.0178272	0.0133919	MYO1B/FN1/IGFBP2/KCNE4/PTH1R/ENPEP/SLC12A2/PDGFRB/CA2/PARD3/TJP1/CSPG4/EMP2/ATP1B2/CA4/SLC19A1/SLC16A2/KCNB1/JAG1/PTEN/FXYD1/PARD6G/SLC7A11/STK39/SPECC1/PTCH1/DDR2/MPDZ/CLIC4/FAT1/SLC9A3R2/APP/DYNC2H1/PFKM/PDE4D/MYL12B/SORBS2/ACTG1/ATP6V1G1/PSEN2/ATP6AP2/CYBRD1/SLC9A1/HVCN1/CDC42/ATP6V1E1/NOTCH1/PRKAA1	48
CC	GO:0019898	extrinsic component of membrane	37/1446	316/19869	0.00286	0.0194655	0.0146226	MGLL/CDH6/GNG11/CAV2/FERMT2/MFGE8/CDH11/EHD2/GNG4/CYTH3/GNG12/SYTL2/KALRN/PTK2/RGS6/FARP1/ARHGEF25/GNA11/STK39/S100A6/GNAI1/HIP1/FYN/EMC2/PACSIN2/IQGAP1/PLEKHA4/ACADVL/ANXA2/JUP/CTNNA1/WDFY3/PIK3CA/STOML2/SEC23A/COQ4/RHOA	37
CC	GO:0042827	platelet dense granule	6/1446	21/19869	0.0030805	0.0207545	0.0155908	ECM1/RARRES2/TIMP3/LGALS3BP/CD63/ITPR1	6
CC	GO:0043296	apical junction complex	21/1446	151/19869	0.00311708	0.0207909	0.0156182	MXRA8/AMOTL2/PARD3/ESAM/LIN7A/FRMD6/TJP1/PMP22/PLXDC1/CYTH3/PARD6G/MPDZ/JAM3/MAGI2/ACTG1/ACTB/JUP/CTNNA1/MAGI1/ARHGAP17/RHOA	21
CC	GO:0098858	actin-based cell projection	28/1446	223/19869	0.00333459	0.0220215	0.0165426	NFASC/MYO1B/MAP2/DMD/EPS8/KITLG/SYNE2/FARP1/UTRN/MYO6/ADCY6/ANGPT1/DAG1/ITGB1/CLIC4/JAM3/ACTA2/FAT1/APP/MYO1C/RHOC/RAPH1/RUFY3/AP2A1/DYNC1H1/CDC42/ATP6V1E1/ABI2	28
CC	GO:0030139	endocytic vesicle	39/1446	343/19869	0.00374387	0.024482	0.018391	SGIP1/NOSTRIN/WNT6/SPARC/EGFR/CAV1/CD9/COLEC12/EHD2/CDC42EP4/IGF2R/WLS/MYO6/EPN2/VIM/DAB2IP/PTCH1/LRP1/VAMP2/GOLIM4/AP2M1/MYO1C/RAB34/ITGB5/WASL/SCARB2/ACTG1/LMBRD1/LDLRAP1/CAMK2G/ZYX/AP2A1/RAB11B/SYT11/HVCN1/RAB5B/CLTC/CDC42/GSN	39
CC	GO:0030133	transport vesicle	46/1446	423/19869	0.00413898	0.0268029	0.0201344	CPE/CAV2/BGN/SLC2A4/CA4/GABBR1/SYTL2/IGF2R/PAM/CD59/RABAC1/PTPRS/NCALD/VAMP2/APP/GOLIM4/SYPL1/CRISPLD2/KDELR1/IQSEC1/SYP/PSEN2/SYNGR1/SSPN/ATP6AP2/GIPC1/MTMR2/AP2A1/RAB11B/STX2/SLC40A1/SYT11/LMAN1/TMED2/SCAMP1/RAB5B/CLTC/ITPR1/RAB1B/TRIP11/AP3S1/YIPF3/ATP6V1E1/PDCD6/SEC23A/TMED7	46
CC	GO:0005775	vacuolar lumen	23/1446	176/19869	0.00451769	0.0289741	0.0217654	AGRN/PRELP/PDGFRB/EPDR1/BGN/LUM/DCN/GPC5/CSPG4/CYB5R3/SDC3/CTSF/CPPED1/ACTR10/SDC2/SCARB2/ANXA2/CTSA/HEBP2/CLN5/DYNC1H1/ASAH1/CHID1	23
CC	GO:0022624	proteasome accessory complex	6/1446	23/19869	0.00505575	0.0321161	0.0241257	PSME1/PSMD9/PSMD8/PSMC3/PSMC5/PSMD13	6
CC	GO:0043198	dendritic shaft	8/1446	38/19869	0.00527943	0.0329101	0.0247222	MAP2/GPER1/GABBR1/RGS7BP/APP/PSEN2/MAP1A/GIPC1	8
CC	GO:0097386	glial cell projection	8/1446	38/19869	0.00527943	0.0329101	0.0247222	NFASC/GRM3/ATP1B2/TMEM50A/SLC7A11/ITGB1/FYN/APP	8
CC	GO:0034992	microtubule organizing center attachment site	4/1446	11/19869	0.00608677	0.0361494	0.0271556	SYNE2/CLMN/SYNE1/SUN1	4
CC	GO:0034993	meiotic nuclear membrane microtubule tethering complex	4/1446	11/19869	0.00608677	0.0361494	0.0271556	SYNE2/CLMN/SYNE1/SUN1	4
CC	GO:0106083	nuclear membrane protein complex	4/1446	11/19869	0.00608677	0.0361494	0.0271556	SYNE2/CLMN/SYNE1/SUN1	4
CC	GO:0106094	nuclear membrane microtubule tethering complex	4/1446	11/19869	0.00608677	0.0361494	0.0271556	SYNE2/CLMN/SYNE1/SUN1	4
CC	GO:0005901	caveola	13/1446	82/19869	0.00608948	0.0361494	0.0271556	ATP1A2/TFPI/CAV2/CAV1/DLC1/TRPC4/EHD2/FXYD1/PTCH1/PACSIN2/BMPR1A/CTNNA1/TGFBR2	13
CC	GO:0043209	myelin sheath	9/1446	47/19869	0.00612426	0.0361494	0.0271556	CA2/PMP22/PTEN/ITGB1/CALM2/JAM3/SERINC5/ANXA2/BCL2	9
CC	GO:0030867	rough endoplasmic reticulum membrane	6/1446	24/19869	0.00633266	0.0367294	0.0275913	PLOD1/PLOD2/SEC61G/SRP9/RPS26/SEC61B	6
CC	GO:0098533	ATPase dependent transmembrane transport complex	6/1446	24/19869	0.00633266	0.0367294	0.0275913	ATP1A2/KCNJ8/ABCC9/ATP1B2/FXYD1/SLC9A1	6
CC	GO:0000315	organellar large ribosomal subunit	10/1446	56/19869	0.00661673	0.037721	0.0283362	MRPL33/MRPL43/MRPL41/MRPL40/GADD45GIP1/MRPL51/MRPL2/MRPL36/MRPL28/MRPL19	10
CC	GO:0005762	mitochondrial large ribosomal subunit	10/1446	56/19869	0.00661673	0.037721	0.0283362	MRPL33/MRPL43/MRPL41/MRPL40/GADD45GIP1/MRPL51/MRPL2/MRPL36/MRPL28/MRPL19	10
CC	GO:0000314	organellar small ribosomal subunit	7/1446	32/19869	0.00714654	0.0400567	0.0300907	AURKAIP1/MRPS26/MRPS25/MRPS9/MRPS18B/MRPS5/MRPS18C	7
CC	GO:0005763	mitochondrial small ribosomal subunit	7/1446	32/19869	0.00714654	0.0400567	0.0300907	AURKAIP1/MRPS26/MRPS25/MRPS9/MRPS18B/MRPS5/MRPS18C	7
CC	GO:0009898	cytoplasmic side of plasma membrane	22/1446	173/19869	0.00743027	0.0412999	0.0310246	GNG11/CAV2/FERMT2/GNG4/CYTH3/GNG12/PTK2/FARP1/PTEN/GNA11/MYH9/S100A6/GNAI1/HIP1/FYN/AP2M1/IQGAP1/PLEKHA4/LDLRAP1/JUP/AP2A1/RHOA	22
CC	GO:0005793	endoplasmic reticulum-Golgi intermediate compartment	18/1446	133/19869	0.00784196	0.043228	0.032473	FN1/ANPEP/CA4/CD59/LRPAP1/KDELR1/CNIH4/YIF1A/TMED4/UGGT2/RAB2A/RER1/LMAN1/NUCB2/TMED2/RAB1B/TRIP11/TMED7	18
CC	GO:0043197	dendritic spine	22/1446	175/19869	0.00847477	0.0461028	0.0346325	ATP1A2/MAP1B/GPER1/GRM3/LZTS1/CTTN/GABBR1/RGS7BP/PTK2/FARP1/ITGB1/APP/ACTN1/ASAP1/ATP6AP2/GIPC1/MTMR2/PPP1CC/SYT11/CDC42/ABI2/RHOA	22
CC	GO:0033017	sarcoplasmic reticulum membrane	8/1446	41/19869	0.00850171	0.0461028	0.0346325	SYNE2/TMEM109/TMEM38B/CAMK2G/REEP5/SRI/ATP2A2/ASPH	8
CC	GO:1990229	iron-sulfur cluster assembly complex	4/1446	12/19869	0.00860971	0.0463119	0.0347897	GLRX5/NDUFAB1/BOLA3/ISCU	4
CC	GO:0044309	neuron spine	22/1446	176/19869	0.00904007	0.0482378	0.0362364	ATP1A2/MAP1B/GPER1/GRM3/LZTS1/CTTN/GABBR1/RGS7BP/PTK2/FARP1/ITGB1/APP/ACTN1/ASAP1/ATP6AP2/GIPC1/MTMR2/PPP1CC/SYT11/CDC42/ABI2/RHOA	22
CC	GO:0005874	microtubule	48/1446	466/19869	0.00943494	0.0499453	0.0375191	MAP2/MAP1B/RADIL/DYNC1I1/SVIL/KIF5C/CALM2/TPPP3/MAP1LC3A/DYNLT3/ARL3/DST/MTUS1/DYNC2H1/RUSC1/DYNLL1/MAP9/FEZ1/DCTN2/KIF13A/CHMP5/IQGAP1/DYNC1I2/DYNLRB1/TUBA1A/CHMP2A/MAP1A/TBCA/KIFAP3/TUBB6/MACF1/MAP4/REEP3/SKA2/DYNC1H1/LZTS2/BCAS3/KIF3A/CCT7/DPYSL2/CLTC/CEP57L1/TBCB/PBXIP1/HOOK3/TPGS2/DYNLT1/CCDC66	48
MF	GO:0015453	oxidoreduction-driven active transmembrane transporter activity	38/1421	71/18432	4.88342e-24	4.95178e-21	4.4105e-21	COX4I2/COX7A1/NDUFB7/COX5B/COX6A1/NDUFB10/COX8A/NDUFA1/NDUFB9/COX7B/NDUFC1/NDUFB2/NDUFC2/NDUFA12/CYC1/NDUFS4/NDUFB4/NDUFB6/NDUFS7/UQCRC1/NDUFA5/NDUFA6/NDUFB1/NDUFA8/CYB5A/NDUFS5/NDUFB3/UQCR10/NDUFS6/NDUFS1/CYBRD1/NDUFS8/COX6B1/NDUFV2/NDUFA3/NDUFB5/NDUFS3/UQCRH	38
MF	GO:0050136	NADH dehydrogenase (quinone) activity	26/1421	42/18432	4.62781e-19	1.68672e-16	1.50234e-16	NQO1/NDUFB7/NDUFB10/NDUFA1/NDUFB9/NDUFC1/NDUFB2/NDUFC2/NDUFA12/NDUFS4/NDUFB4/NDUFB6/NDUFS7/NDUFA5/NDUFA6/NDUFB1/NDUFA8/NDUFS5/NDUFB3/NDUFS6/NDUFS1/NDUFS8/NDUFV2/NDUFA3/NDUFB5/NDUFS3	26
MF	GO:0009055	electron transfer activity	44/1421	122/18432	4.9903e-19	1.68672e-16	1.50234e-16	COX4I2/COX7A1/NDUFB7/COX5B/P4HA2/COX6A1/NDUFB10/COX8A/NDUFA1/NDUFB9/COX7B/ADH5/NDUFC1/NDUFB2/NDUFC2/NDUFA12/CYC1/NDUFS4/NDUFB4/NDUFB6/SDHD/NDUFS7/UQCRC1/NDUFA5/NDUFA6/NDUFB1/NDUFA8/CYB5A/NDUFS5/NDUFB3/UQCR10/NDUFS6/NDUFS1/COX11/ETFB/NDUFS8/COX6B1/NDUFV2/AKR7A2/NDUFA3/NDUFB5/NDUFS3/ASPH/UQCRH	44
MF	GO:0003954	NADH dehydrogenase activity	26/1421	44/18432	2.45934e-18	6.23443e-16	5.55293e-16	NQO1/NDUFB7/NDUFB10/NDUFA1/NDUFB9/NDUFC1/NDUFB2/NDUFC2/NDUFA12/NDUFS4/NDUFB4/NDUFB6/NDUFS7/NDUFA5/NDUFA6/NDUFB1/NDUFA8/NDUFS5/NDUFB3/NDUFS6/NDUFS1/NDUFS8/NDUFV2/NDUFA3/NDUFB5/NDUFS3	26
MF	GO:0008137	NADH dehydrogenase (ubiquinone) activity	25/1421	41/18432	3.78164e-18	7.66917e-16	6.83084e-16	NDUFB7/NDUFB10/NDUFA1/NDUFB9/NDUFC1/NDUFB2/NDUFC2/NDUFA12/NDUFS4/NDUFB4/NDUFB6/NDUFS7/NDUFA5/NDUFA6/NDUFB1/NDUFA8/NDUFS5/NDUFB3/NDUFS6/NDUFS1/NDUFS8/NDUFV2/NDUFA3/NDUFB5/NDUFS3	25
MF	GO:0003955	NAD(P)H dehydrogenase (quinone) activity	26/1421	45/18432	5.40011e-18	9.12619e-16	8.12859e-16	NQO1/NDUFB7/NDUFB10/NDUFA1/NDUFB9/NDUFC1/NDUFB2/NDUFC2/NDUFA12/NDUFS4/NDUFB4/NDUFB6/NDUFS7/NDUFA5/NDUFA6/NDUFB1/NDUFA8/NDUFS5/NDUFB3/NDUFS6/NDUFS1/NDUFS8/NDUFV2/NDUFA3/NDUFB5/NDUFS3	26
MF	GO:0016655	oxidoreductase activity, acting on NAD(P)H, quinone or similar compound as acceptor	28/1421	57/18432	8.93646e-17	1.29451e-14	1.153e-14	NQO1/NDUFB7/AKR1C1/NDUFB10/NDUFA1/NDUFB9/NDUFC1/NDUFB2/NDUFC2/NDUFA12/NDUFS4/NDUFB4/NDUFB6/NDUFS7/NDUFA5/NDUFA6/NDUFB1/NDUFA8/NDUFS5/NDUFB3/NDUFS6/NDUFS1/NDUFS8/CBR1/NDUFV2/NDUFA3/NDUFB5/NDUFS3	28
MF	GO:0015399	primary active transmembrane transporter activity	47/1421	169/18432	3.7556e-15	4.76023e-13	4.23988e-13	ATP1A2/KCNJ8/ABCC9/ABCA8/ABCA9/COX4I2/COX7A1/ABCA5/NDUFB7/COX5B/COX6A1/NDUFB10/COX8A/NDUFA1/NDUFB9/COX7B/NDUFC1/NDUFB2/NDUFC2/NDUFA12/CYC1/NDUFS4/NDUFB4/NDUFB6/NDUFS7/UQCRC1/NDUFA5/NDUFA6/ATP6V1G1/NDUFB1/NDUFA8/CYB5A/NDUFS5/NDUFB3/UQCR10/NDUFS6/NDUFS1/CYBRD1/NDUFS8/COX6B1/NDUFV2/NDUFA3/NDUFB5/NDUFS3/ATP2A2/ATP6V1E1/UQCRH	47
MF	GO:0003779	actin binding	81/1421	439/18432	1.11456e-13	1.25574e-11	1.11847e-11	CNN3/SPTBN1/COBLL1/TTN/MYO1B/TNS1/MYLK/MAP1B/DAAM2/EGFR/CALD1/DMD/PLS3/PDLIM2/SNTB1/TPM2/NEBL/PARVA/CTTN/TAGLN/EPS8/PAWR/AJUBA/FERMT2/SYNE2/CLMN/VCL/PLEKHG3/PTK2/ACTN4/EPB41L1/FLNA/UTRN/TPM1/MYO6/ANXA6/SMTN/PDLIM1/SVIL/LIMA1/PHACTR2/ARPC1A/DAG1/ITGB1/MYH9/NCALD/MYH10/ALDOA/NEXN/INF2/SYNPO2/HIP1/SYNE1/DSTN/LMOD1/PDLIM7/DST/PLEKHH2/MPRIP/PFN2/RUSC1/MYO1C/MARCKSL1/TPM4/IQGAP1/CFL2/ADD3/ACTN1/WASL/AD…	81
MF	GO:0016651	oxidoreductase activity, acting on NAD(P)H	29/1421	87/18432	5.06176e-12	5.13263e-10	4.57157e-10	NQO1/NDUFB7/AKR1C1/CYB5R3/NDUFB10/NDUFA1/NDUFB9/NDUFC1/NDUFB2/NDUFC2/NDUFA12/NDUFS4/NDUFB4/NDUFB6/NDUFS7/NDUFA5/NDUFA6/NDUFB1/NDUFA8/NDUFS5/NDUFB3/NDUFS6/NDUFS1/NDUFS8/CBR1/NDUFV2/NDUFA3/NDUFB5/NDUFS3	29
MF	GO:0045296	cadherin binding	62/1421	333/18432	6.05134e-11	5.57824e-09	4.96847e-09	CNN3/SPTBN1/COBLL1/MYO1B/PHLDB2/CDH6/EGFR/CALD1/PARVA/CTTN/PPFIBP1/TRPC4/TJP1/CDH11/BSG/NOTCH3/VCL/FLNA/EPN2/VASN/PDLIM1/LIMA1/DOCK9/ITGB1/MYH9/DAB2IP/TNKS1BP1/ALDOA/AHNAK/KTN1/CDC42EP1/SLC9A3R2/MPRIP/EPHA2/PARK7/PACSIN2/CD46/TAGLN2/CHMP5/IQGAP1/ADD1/ERC1/ASAP1/PSMB6/GIPC1/MACF1/ANXA2/CNN2/JUP/CTNNA1/UNC45A/RAB11B/TLN1/RPS26/HNRNPK/CAST/STK24/TMOD3/RANBP1/ARHGAP1/PCMT1/PDLIM5	62
MF	GO:0005518	collagen binding	24/1421	69/18432	1.25174e-10	1.05772e-08	9.42099e-09	ITGA10/NID1/FN1/PCOLCE2/SPARCL1/ITGA1/SPARC/COL14A1/ECM2/LUM/DCN/C1QTNF1/COL5A3/COL6A1/COL6A2/PCOLCE/ITGB1/THBS1/DDR2/AEBP1/MRC2/HSD17B12/PPIB/SMAD4	24
MF	GO:0005201	extracellular matrix structural constituent	39/1421	173/18432	8.23287e-10	6.42164e-08	5.71968e-08	AGRN/TINAGL1/ECM1/LAMC1/PRELP/NID1/COL5A2/FN1/COL4A4/COL4A3/LAMB2/IGFBP7/EDIL3/SPARC/COL9A1/LAMA4/LAMA2/COL1A2/MXRA5/BGN/COL14A1/MGP/LUM/DCN/COL4A1/COL4A2/MFGE8/COL5A3/FBLN1/COL6A1/COL6A2/PCOLCE/EFEMP2/THBS1/COL27A1/LTBP1/AEBP1/EMILIN1/CRELD1	39
MF	GO:0005178	integrin binding	36/1421	156/18432	1.86318e-09	1.34948e-07	1.20196e-07	ITGA10/FN1/COL4A3/LAMB2/ITGA1/EDIL3/PTN/S1PR3/ECM2/TSPAN4/IGF2/CD9/ITGA7/FERMT2/MFGE8/EMP2/FBLN1/CD151/PTK2/ACTN4/TSPAN8/UTRN/FGF1/ITGB1/MYH9/THBS1/JAM3/DST/EMILIN1/ITGB1BP1/ACTN1/ITGB5/CD81/TLN1/ANXA7/ISG15	36
MF	GO:0051015	actin filament binding	44/1421	219/18432	3.29968e-09	2.23058e-07	1.98676e-07	SPTBN1/TTN/MYO1B/EGFR/DMD/PLS3/TPM2/NEBL/CTTN/TAGLN/AJUBA/FERMT2/SYNE2/CLMN/ACTN4/FLNA/UTRN/TPM1/MYO6/ANXA6/SVIL/LIMA1/ARPC1A/MYH9/MYH10/NEXN/HIP1/SYNE1/DSTN/MPRIP/MYO1C/MARCKSL1/TPM4/IQGAP1/CFL2/ADD3/ACTN1/ADD1/MYO9A/MACF1/CTNNA1/TLN1/ABL1/GSN	44
MF	GO:0022804	active transmembrane transporter activity	66/1421	417/18432	1.57405e-08	9.97557e-07	8.88513e-07	ATP1A2/SLC6A1/SLC12A2/SLC2A12/SLC20A2/SLC6A12/SLC6A13/SLCO1C1/KCNJ8/ABCC9/SLC2A4/ABCA8/ABCA9/COX4I2/COX7A1/SLC19A1/ABCA5/SLC12A7/SLC16A2/SLC7A11/NDUFB7/COX5B/COX6A1/NDUFB10/COX8A/NDUFA1/NDUFB9/SLCO3A1/COX7B/SLC16A4/NDUFC1/SLC25A4/NDUFB2/NDUFC2/NDUFA12/CYC1/NDUFS4/NDUFB4/NDUFB6/SLC38A2/SLC12A4/NDUFS7/UQCRC1/NDUFA5/NDUFA6/ATP6V1G1/NDUFB1/NDUFA8/CYB5A/NDUFS5/NDUFB3/UQCR10/NDUFS6/NDUFS1/CYBRD1/SLC9A1…	66
MF	GO:0050840	extracellular matrix binding	19/1421	56/18432	1.69863e-08	1.01318e-06	9.02431e-07	AGRN/TINAGL1/ECM1/NID1/SPARCL1/SPARC/SMOC2/BGN/CD248/ITGA7/DCN/NTN4/LGALS1/BCAM/OLFML2A/DAG1/ITGB1/THBS1/LGALS3	19
MF	GO:0008307	structural constituent of muscle	16/1421	42/18432	3.47537e-08	1.95779e-06	1.74378e-06	TTN/DMD/TPM2/NEBL/CSRP2/SYNM/MYL9/TPM1/SMTN/DAG1/MYL6/NEXN/TPM4/SORBS2/MYL6B/ASPH	16
MF	GO:0098631	cell adhesion mediator activity	19/1421	64/18432	1.92139e-07	1.02542e-05	9.13326e-06	CNN3/ITGA10/NFASC/CNTN4/ITGA1/ESAM/BSG/BCAM/PDLIM1/ITGB1/NEXN/CDC42EP1/JAM3/EMILIN1/ANXA2/JUP/NPTN/TMOD3/PDLIM5	19
MF	GO:0043236	laminin binding	12/1421	28/18432	3.99599e-07	2.02596e-05	1.8045e-05	AGRN/TINAGL1/ECM1/NID1/ITGA7/NTN4/LGALS1/BCAM/DAG1/ITGB1/THBS1/LGALS3	12
MF	GO:0017166	vinculin binding	8/1421	12/18432	4.57483e-07	2.20899e-05	1.96752e-05	DMD/SYNM/UTRN/DAG1/SORBS3/ACTN1/CTNNA1/TLN1	8
MF	GO:1901681	sulfur compound binding	42/1421	270/18432	9.79369e-06	0.0004514	0.000402057	AGRN/CFH/PRELP/FN1/FSTL1/PCOLCE2/SEMA5A/SMOC2/PTN/ECM2/COL5A3/EVA1C/LPL/PCOLCE/CCDC80/PGF/SOD3/ANXA6/SULT1A1/FGF1/PTPRS/EFEMP2/THBS1/PTCH1/LRP1/GSTP1/LRPAP1/APP/PCCA/CRISPLD2/ACADVL/HSD17B12/ADAMTS1/ECI2/APLP2/PDCD5/ILVBL/SMAD4/METTL17/TSR3/AAMP/SCP2	42
MF	GO:0030020	extracellular matrix structural constituent conferring tensile strength	12/1421	41/18432	4.0443e-05	0.00173397	0.00154442	COL5A2/COL4A4/COL4A3/COL9A1/COL1A2/COL14A1/COL4A1/COL4A2/COL5A3/COL6A1/COL6A2/COL27A1	12
MF	GO:0098632	cell-cell adhesion mediator activity	14/1421	54/18432	4.24138e-05	0.00173397	0.00154442	CNN3/NFASC/CNTN4/ESAM/BSG/PDLIM1/NEXN/CDC42EP1/JAM3/ANXA2/JUP/NPTN/TMOD3/PDLIM5	14
MF	GO:0004129	cytochrome-c oxidase activity	8/1421	19/18432	4.27507e-05	0.00173397	0.00154442	COX4I2/COX7A1/COX5B/COX6A1/COX8A/COX7B/CYB5A/COX6B1	8
MF	GO:0016675	oxidoreductase activity, acting on a heme group of donors	8/1421	20/18432	6.64431e-05	0.00259128	0.00230802	COX4I2/COX7A1/COX5B/COX6A1/COX8A/COX7B/CYB5A/COX6B1	8
MF	GO:0008201	heparin binding	28/1421	171/18432	0.000116097	0.00436007	0.00388346	CFH/PRELP/FN1/FSTL1/PCOLCE2/SMOC2/PTN/ECM2/COL5A3/EVA1C/LPL/PCOLCE/CCDC80/PGF/SOD3/FGF1/PTPRS/EFEMP2/THBS1/PTCH1/LRPAP1/APP/CRISPLD2/HSD17B12/ADAMTS1/APLP2/PDCD5/AAMP	28
MF	GO:0005516	calmodulin binding	31/1421	200/18432	0.000146169	0.0052934	0.00471477	CNN3/RGS4/SPTBN1/TTN/MYO1B/MAP2/MYLK/CALD1/SNTB1/CACNA1C/TJP1/REM1/MYO6/MYH9/MYH10/VAMP2/AEBP1/MYO1C/ADCY3/AKAP12/RRAD/MARCKSL1/IQGAP1/ADD3/CAMK1/ADD1/SLC9A1/CAMK2G/CNN2/PHKB/EDF1	31
MF	GO:0005539	glycosaminoglycan binding	35/1421	237/18432	0.000151606	0.00530099	0.00472153	AGRN/CFH/PRELP/FN1/FSTL1/PCOLCE2/SEMA5A/SMOC2/PTN/BGN/ECM2/DCN/COL5A3/EVA1C/LPL/PCOLCE/CCDC80/PGF/SOD3/ANXA6/FGF1/PTPRS/EFEMP2/THBS1/PTCH1/LRPAP1/APP/CRISPLD2/HSD17B12/ADAMTS1/APLP2/PDCD5/EXTL2/AAMP/TGFBR2	35
MF	GO:0051393	alpha-actinin binding	9/1421	28/18432	0.00016852	0.00569599	0.00507335	TTN/PDLIM2/CACNA1C/PDLIM1/DAG1/SYNPO2/PDLIM7/MAGI1/PDLIM5	9
MF	GO:0070679	inositol 1,4,5 trisphosphate binding	6/1421	13/18432	0.000221997	0.00726146	0.0064677	TRPC3/TRPC6/TRPC4/PLCL1/TRPC1/ITPR1	6
MF	GO:0042805	actinin binding	10/1421	36/18432	0.000284677	0.00874736	0.00779117	TTN/PDLIM2/CACNA1C/CSRP2/PDLIM1/DAG1/SYNPO2/PDLIM7/MAGI1/PDLIM5	10
MF	GO:0043394	proteoglycan binding	10/1421	36/18432	0.000284677	0.00874736	0.00779117	AGRN/CFH/NID1/FN1/SEMA5A/COL5A3/LPL/PTPRS/THBS1/LRP1	10
MF	GO:0044548	S100 protein binding	6/1421	14/18432	0.000363188	0.0108316	0.00964754	FGF1/S100A6/AHNAK/IQGAP1/ANXA2/ATP2A2	6
MF	GO:0016860	intramolecular oxidoreductase activity	12/1421	51/18432	0.000395662	0.0114629	0.0102099	PTGDS/PIGK/TPI1/HYI/ECI2/ECI1/MIF/GPI/CRELD1/ECH1/MRI1/ECHS1	12
MF	GO:0043178	alcohol binding	17/1421	90/18432	0.000460756	0.012978	0.0115593	TRPC3/CAV1/TRPC6/TRPC4/RBP1/ANXA6/PLCL1/PTCH1/NR1H3/TRPC1/SCARB2/SYP/CD81/CDIPT/ITPR1/VDAC2/SCP2	17
MF	GO:0051371	muscle alpha-actinin binding	6/1421	15/18432	0.000565945	0.01551	0.0138145	TTN/PDLIM2/PDLIM1/SYNPO2/PDLIM7/PDLIM5	6
MF	GO:0002162	dystroglycan binding	5/1421	11/18432	0.000842066	0.0224699	0.0200137	AGRN/MAP2/DMD/VCL/DAG1	5
MF	GO:0043495	protein-membrane adaptor activity	8/1421	28/18432	0.00093996	0.024439	0.0217675	SYNE2/LPL/MYH9/SYNE1/SLC9A3R2/SUN1/JUP/PDCD6	8
MF	GO:0003713	transcription coactivator activity	37/1421	281/18432	0.000964337	0.0244459	0.0217737	FHL5/SMARCD3/RBPMS/NUPR1/TGFB1I1/ACTN4/ETS1/YAP1/PDLIM1/NUCKS1/TACC1/WWTR1/JADE1/PARK7/ACTN1/DDX17/MAML2/PPARGC1B/JUP/ATN1/SSBP3/PCBD1/TRIM37/ABL1/EDF1/SMARCC2/PSMD9/BRD8/TRIP11/PRPF6/HCFC2/PBXIP1/NCOA2/PHF2/BCL9L/NOTCH1/MED4	37
MF	GO:0140297	DNA-binding transcription factor binding	56/1421	476/18432	0.0010058	0.0248752	0.022156	PRRX1/TRIB2/EPAS1/FHL2/FOXC1/HEY2/SMARCD3/RUNX1T1/RERG/TBX3/TGFB1I1/TBX2/ACTN4/LEF1/FLNA/TLE1/PBX1/ETS1/YAP1/RBFOX2/HES1/NUCKS1/NFIA/TACC1/ID3/CHCHD2/IFI27/CRTC3/PARK7/TRIP6/BBS7/ADD1/ACTB/FOXP1/NBN/PPARGC1B/JUP/RBX1/BCL2/HMGN3/HDAC1/BCAS3/GTF2A2/PSMD9/SMAD4/BRD8/BCL6/PRKDC/SRI/PRPF6/DDRGK1/PBXIP1/RBPJ/NCOA2/PSMC5/MED4	56
MF	GO:0048029	monosaccharide binding	14/1421	72/18432	0.00105777	0.0249067	0.0221841	PLOD1/COLEC12/BSG/IGF2R/PAM/PLOD2/P4HA2/ALDOA/PFKM/CLN5/GPI/P4HTM/LMAN1/UGP2	14
MF	GO:0030695	GTPase regulator activity	57/1421	488/18432	0.00108077	0.0249067	0.0221841	ARHGAP29/RGS4/RGS5/ASAP2/RAPGEF4/ARHGAP10/RANBP3L/RAPGEF5/DENND2A/DLC1/PREX2/PLCE1/ARHGEF17/ARHGAP42/CYSLTR2/SYDE1/CYTH3/PLEKHG3/KALRN/RGS6/TBXA2R/RGS11/FARP1/ARHGEF12/ARHGEF25/AGAP1/DOCK9/DOCK1/DAB2IP/RASGRP2/DOCK6/ITSN1/ARHGAP6/ITGB1BP1/IQGAP1/IQSEC1/FARP2/WASL/MYO9A/ASAP1/LAMTOR5/CHM/STARD8/STARD13/ARHGEF7/HERC2/RABGAP1/NUCB2/NF1/ARHGAP17/PLEKHG2/DENND6A/RANBP1/WDR41/ARHGAP1/SEC23A/RASAL2	57
MF	GO:0060589	nucleoside-triphosphatase regulator activity	57/1421	488/18432	0.00108077	0.0249067	0.0221841	ARHGAP29/RGS4/RGS5/ASAP2/RAPGEF4/ARHGAP10/RANBP3L/RAPGEF5/DENND2A/DLC1/PREX2/PLCE1/ARHGEF17/ARHGAP42/CYSLTR2/SYDE1/CYTH3/PLEKHG3/KALRN/RGS6/TBXA2R/RGS11/FARP1/ARHGEF12/ARHGEF25/AGAP1/DOCK9/DOCK1/DAB2IP/RASGRP2/DOCK6/ITSN1/ARHGAP6/ITGB1BP1/IQGAP1/IQSEC1/FARP2/WASL/MYO9A/ASAP1/LAMTOR5/CHM/STARD8/STARD13/ARHGEF7/HERC2/RABGAP1/NUCB2/NF1/ARHGAP17/PLEKHG2/DENND6A/RANBP1/WDR41/ARHGAP1/SEC23A/RASAL2	57
MF	GO:0004115	3',5'-cyclic-AMP phosphodiesterase activity	6/1421	17/18432	0.00122372	0.0275746	0.0245604	PDE8B/PDE7B/PDE2A/PDE3A/PDE4D/PDE8A	6
MF	GO:0060090	molecular adaptor activity	57/1421	492/18432	0.00130847	0.0282422	0.025155	COL4A4/SASH1/COL1A2/CAV2/CAV1/COL14A1/AFAP1L2/EPS8/SYNE2/NUPR1/ATP1B2/LPL/DZIP1/JAG1/SOD3/VIM/AXIN2/MYH9/DAB2IP/SYNPO2/HIP1/OPTN/MAGI2/SYNE1/ITSN1/VAMP2/SH3RF1/SLC9A3R2/SUN1/AP2M1/SKP1/LGALS3/PRDX4/EMILIN1/IQGAP1/CDKN1B/SORBS2/LAMTOR5/MAP1A/LDLRAP1/SLC9A1/SAV1/JUP/RBX1/AP2A1/BCL2/STX2/MAGI1/FIS1/HMGN2/WWC3/STUB1/TGFBR2/ABI2/ISCU/PDCD6/NAPA	57
MF	GO:0048156	tau protein binding	10/1421	43/18432	0.00130906	0.0282422	0.025155	MAP2/HSPA2/ROCK2/FYN/ACTB/MAP1A/PIN1/PPP2CB/STUB1/PRKAA1	10
MF	GO:0005543	phospholipid binding	55/1421	474/18432	0.00152109	0.032133	0.0286205	SGIP1/F3/SPTBN1/MYO1B/MAP1B/EPDR1/PARD3/FERMT2/MFGE8/CYTH3/SYTL2/JAG1/EPN2/ANXA6/F10/SVIL/PLTP/AGAP1/DAB2IP/THBS1/GRK5/PLEKHA5/MAP1LC3A/PEBP1/HIP1/VAMP2/PFN2/PACSIN2/SESTD1/IQGAP1/PLEKHA4/SCARB2/BAD/ASAP1/LAPTM4B/CHMP2A/PIGK/PHLDA1/LDLRAP1/SLC9A1/ANXA2/CPNE3/AXL/GPAA1/TLN1/ANXA7/WDFY3/BCAS3/SYT11/PITPNC1/NF1/ITPR1/VDAC2/GSN/STOML2	55
MF	GO:0030551	cyclic nucleotide binding	9/1421	37/18432	0.00161499	0.0328456	0.0292552	RAPGEF4/PDE5A/PRKG1/SLC19A1/PDE2A/HCN2/CNGA1/PRKAR1A/PDE4D	9
MF	GO:0004114	3',5'-cyclic-nucleotide phosphodiesterase activity	7/1421	24/18432	0.00171471	0.0328456	0.0292552	PDE5A/PDE8B/PDE7B/PDE2A/PDE3A/PDE4D/PDE8A	7
MF	GO:0051537	2 iron, 2 sulfur cluster binding	7/1421	24/18432	0.00171471	0.0328456	0.0292552	GLRX5/CISD1/NDUFS1/ISCA1/NDUFV2/CISD3/ISCU	7
MF	GO:0043395	heparan sulfate proteoglycan binding	6/1421	18/18432	0.00171678	0.0328456	0.0292552	AGRN/CFH/SEMA5A/LPL/PTPRS/LRP1	6
MF	GO:0098641	cadherin binding involved in cell-cell adhesion	6/1421	18/18432	0.00171678	0.0328456	0.0292552	CNN3/PDLIM1/CDC42EP1/ANXA2/TMOD3/PDLIM5	6
MF	GO:0016853	isomerase activity	23/1421	156/18432	0.00196555	0.0366476	0.0326416	PTGDS/ISYNA1/FKBP10/FKBP9/PGAM1/DSEL/FKBP2/PIGK/PPIB/TPI1/HYI/DSE/PIN4/ECI2/PIN1/ECI1/MIF/GPI/CRELD1/ECH1/MRI1/HSD17B4/ECHS1	23
MF	GO:0016209	antioxidant activity	15/1421	85/18432	0.00198939	0.0366476	0.0326416	GPX3/SOD3/NQO1/MGST3/GSTP1/PRDX2/PARK7/PRDX4/TXN/CAT/GSTK1/GSTT1/PRDX5/SOD1/GSTO1	15
MF	GO:0003774	cytoskeletal motor activity	18/1421	111/18432	0.00202393	0.0366476	0.0326416	MYO1B/MYO6/DYNC1I1/KIF5C/MYH9/MYL6/MYH10/DYNC2H1/MYO1C/KIF13A/DYNC1I2/DYNLRB1/MYO9A/PIN1/DYNC1H1/KIF3A/MYL6B/SMC3	18
MF	GO:0005520	insulin-like growth factor binding	6/1421	19/18432	0.00234702	0.0411043	0.0366111	IGFBP2/IGFBP7/IGFBP6/IGFBP5/IGF2R/IGFBP4	6
MF	GO:0046332	SMAD binding	14/1421	78/18432	0.00235113	0.0411043	0.0366111	COL5A2/RANBP3L/COL1A2/FERMT2/TGFB1I1/AXIN2/MAGI2/BMPR1A/SAV1/PMEPA1/SMAD4/SMAD5/STUB1/TGFBR2	14
MF	GO:0019838	growth factor binding	20/1421	132/18432	0.00270984	0.0465726	0.0414816	IGFBP2/IGFBP7/PDGFRB/EGFR/COL1A2/COL4A1/COL6A1/IGFBP6/IGFBP5/IGF2R/VASN/IGFBP4/THBS1/LRRC32/LTBP1/EPHA2/LTBP3/GLG1/TGFBR2/SEC61B	20
MF	GO:0004112	cyclic-nucleotide phosphodiesterase activity	7/1421	26/18432	0.00284468	0.0480752	0.04282	PDE5A/PDE8B/PDE7B/PDE2A/PDE3A/PDE4D/PDE8A	7
MF	GO:0032036	myosin heavy chain binding	5/1421	14/18432	0.00300046	0.0498765	0.0444244	PDLIM2/MYL9/MYL12A/MYL12B/AXL	5

## Sheet: Table S3.2
Table S3.2 GO enrichment results based on down-regulated expressed genes (Smooth Muscle Cell vs other cells) in scRNA-seq (GSE201048)
ONTOLOGY	ID	Description	GeneRatio	BgRatio	pvalue	p.adjust	qvalue	geneID	Count
BP	GO:0022407	regulation of cell-cell adhesion	118/1285	490/18903	5.03e-35	9.72e-32	6.41e-32	CD74/PTPRC/LAPTM5/HLA-DRA/HLA-DRB1/CD83/HSPH1/HLA-E/HLA-DPA1/AIF1/HSPD1/ITGB2/HAVCR2/DOCK8/HLA-DPB1/IL18/IL1B/HLA-DQB1/LILRB4/HLA-DMA/EGR3/SOCS6/RUNX1/CORO1A/NFKBID/HLA-DQA1/NR4A3/LGALS9/HLA-DMB/VSIG4/XBP1/FGL2/LYN/CD86/RPS3/MBP/NLRP3/SPI1/PELI1/PLAUR/PRNP/IL6ST/PTAFR/TGFB1/KLF4/PYCARD/HLA-DRB5/ABL2/NFKBIZ/CD55/NCKAP1L/TNF/SIRPA/SYK/PNP/CD300A/IL1A/ZC3H12A/FXYD5/FERMT3/IGF1/PDPN/RASAL3/PRKCD/CCL5…	118
BP	GO:0001819	positive regulation of cytokine production	115/1285	486/18903	2.21e-33	2.77e-30	1.83e-30	CD74/PTPRC/LAPTM5/CD83/TYROBP/CSF1R/HLA-E/C3/CCL3/HLA-DPA1/SORL1/HSP90AA1/AIF1/HSPD1/HAVCR2/HSPA1A/HLA-DPB1/IL18/CYBB/IL1B/HSPA1B/FCER1G/CD84/HMOX1/FCGR3A/C3AR1/CLEC7A/DDX21/IFNGR1/RUNX1/TREM2/IRF8/PTGER4/NR4A3/LGALS9/SLC11A1/XBP1/IFI16/CD86/RPS3/MBP/C5AR1/NLRP3/PELI1/TLR4/TLR2/IL6ST/CD14/SERPINE1/PTAFR/P2RX7/TGFB1/PYCARD/POU2F2/CD55/SLC7A5/NAIP/TNF/OSM/SYK/PNP/IL1A/IL6R/PTGS2/TLR1/IL17RA/LY96/BT…	115
BP	GO:0050867	positive regulation of cell activation	111/1285	467/18903	2.01e-32	1.66e-29	1.1e-29	CD74/PTPRC/HLA-DRA/HLA-DRB1/CD83/TYROBP/HSPH1/HLA-E/CCL3/HLA-DPA1/AIF1/HSPD1/ITGB2/HAVCR2/PLEK/DOCK8/HLA-DPB1/IL18/IL1B/CTSC/GPR183/HLA-DQB1/FCGR3A/LILRB4/HLA-DMA/CLEC7A/EGR3/RUNX1/CORO1A/TREM2/NFKBID/HLA-DQA1/CDKN1A/NR4A3/LGALS9/STX4/HLA-DMB/XBP1/LYN/CD86/RPS3/CEBPA/INPP5D/NLRP3/IRS2/PELI1/TLR4/MIR142/IL6ST/PTAFR/TGFB1/PYCARD/HLA-DRB5/ABL2/NFKBIZ/CD55/NCKAP1L/JUND/TNF/SIRPA/SYK/PNP/IL1A/ITGAM/IG…	111
BP	GO:0045785	positive regulation of cell adhesion	110/1285	484/18903	2.65e-30	1.71e-27	1.13e-27	CD74/PTPRC/HLA-DRA/HLA-DRB1/APBB1IP/CD83/HSPH1/HLA-E/HLA-DPA1/AIF1/HSPD1/ITGB2/HAVCR2/DOCK8/HLA-DPB1/IL18/IL1B/HLA-DQB1/STK4/LILRB4/HLA-DMA/EGR3/RUNX1/CORO1A/NFKBID/HLA-DQA1/NR4A3/P2RY12/LGALS9/STX4/HLA-DMB/PREX1/XBP1/LYN/CD86/RPS3/NLRP3/RIN2/PDGFB/PLAUR/IL6ST/PTAFR/PYCARD/HLA-DRB5/ABL2/NFKBIZ/MAP4K4/CD55/NCKAP1L/TNF/SIRPA/SYK/PNP/ATM/IL1A/ARPC2/IGF1/PDPN/RASAL3/CCL5/RIPK2/MAP3K8/LILRB1/ALOX5/CCD…	110
BP	GO:0002696	positive regulation of leukocyte activation	109/1285	450/18903	1.25e-32	1.21e-29	7.98e-30	CD74/PTPRC/HLA-DRA/HLA-DRB1/CD83/TYROBP/HSPH1/HLA-E/CCL3/HLA-DPA1/AIF1/HSPD1/ITGB2/HAVCR2/DOCK8/HLA-DPB1/IL18/IL1B/CTSC/GPR183/HLA-DQB1/FCGR3A/LILRB4/HLA-DMA/CLEC7A/EGR3/RUNX1/CORO1A/TREM2/NFKBID/HLA-DQA1/CDKN1A/NR4A3/LGALS9/STX4/HLA-DMB/XBP1/LYN/CD86/RPS3/CEBPA/INPP5D/NLRP3/IRS2/PELI1/TLR4/MIR142/IL6ST/PTAFR/TGFB1/PYCARD/HLA-DRB5/ABL2/NFKBIZ/CD55/NCKAP1L/JUND/TNF/SIRPA/SYK/PNP/IL1A/ITGAM/IGF1/VA…	109
BP	GO:0007159	leukocyte cell-cell adhesion	108/1285	414/18903	1.96e-35	5.67e-32	3.74e-32	CD74/PTPRC/LAPTM5/HLA-DRA/HLA-DRB1/CD83/OLR1/HSPH1/HLA-E/HLA-DPA1/AIF1/HSPD1/ITGB2/HAVCR2/DOCK8/HLA-DPB1/IL18/IL1B/HLA-DQB1/LILRB4/HLA-DMA/CX3CR1/EGR3/SOCS6/RUNX1/CORO1A/NFKBID/HLA-DQA1/SELPLG/NR4A3/LGALS9/HLA-DMB/VSIG4/XBP1/FGL2/LYN/CD86/RPS3/NLRP3/PELI1/PRNP/IL6ST/PTAFR/KLF4/PYCARD/HLA-DRB5/ABL2/SEMA4D/NFKBIZ/CD55/NCKAP1L/ICAM1/TNF/SIRPA/SYK/PNP/CD300A/IL1A/ZC3H12A/FERMT3/IGF1/STK10/RASAL3/CCL5…	108
BP	GO:0032103	positive regulation of response to external stimulus	105/1285	464/18903	8.69e-29	3.88e-26	2.55e-26	CD74/TYROBP/CSF1R/HLA-E/C3/CCL3/HSP90AA1/AIF1/CCL4/NFKBIA/HAVCR2/NEAT1/IL18/IL1B/CTSC/FCGR1A/RPS19/C3AR1/ALOX5AP/CLEC7A/CX3CR1/TREM2/CXCR4/PTGER4/P2RY12/LGALS9/STX4/LY86/LYN/IFI16/LGMN/CEBPA/C5AR1/NLRP3/SPI1/TLR4/MIR142/TLR2/PDGFB/IL6ST/CD14/SERPINE1/NINJ1/TGFB1/PYCARD/NFKBIZ/NCKAP1L/NAIP/CCR1/TNF/OSM/SYK/PAK1/IL6R/PTGS2/USP15/VAMP8/IL17RA/TMSB4X/SFPQ/P2RX4/LY96/BTK/SNCA/TLR7/GRN/CASP1/CCL5/RIPK2…	105
BP	GO:1903131	mononuclear cell differentiation	103/1285	473/18903	8.12e-27	2.35e-24	1.55e-24	CD74/PTPRC/HLA-DRA/HLA-DRB1/CD83/ZFP36L2/CSF1R/ID2/JUNB/IL18/IL1B/GPR183/FCER1G/HLA-B/LILRB4/EGR3/RUNX1/TREM2/NFKBID/IRF8/IKZF1/KLF6/PTGER4/LGALS9/PREX1/MAFB/XBP1/FGL2/LYN/IFI16/CD86/INPP5D/RPS6/NLRP3/FOS/SPI1/DOCK2/LYL1/JUN/NFKBIZ/NCKAP1L/SYK/BLNK/PNP/ATM/IL1A/HHEX/DOCK10/ZC3H12A/IL6R/JMJD6/ST3GAL1/HDAC9/CHD7/BTK/NFIL3/PRDM1/RELB/RIPK2/INHBA/LILRB1/PTPN6/SMAD7/PTPRJ/TRPM2/MERTK/CEBPB/PTPN2/PKNOX…	103
BP	GO:1903037	regulation of leukocyte cell-cell adhesion	97/1285	377/18903	2.3e-31	1.67e-28	1.1e-28	CD74/PTPRC/LAPTM5/HLA-DRA/HLA-DRB1/CD83/HSPH1/HLA-E/HLA-DPA1/AIF1/HSPD1/ITGB2/HAVCR2/DOCK8/HLA-DPB1/IL18/IL1B/HLA-DQB1/LILRB4/HLA-DMA/EGR3/SOCS6/RUNX1/CORO1A/NFKBID/HLA-DQA1/NR4A3/LGALS9/HLA-DMB/VSIG4/XBP1/FGL2/LYN/CD86/RPS3/NLRP3/PELI1/PRNP/IL6ST/PTAFR/KLF4/PYCARD/HLA-DRB5/ABL2/NFKBIZ/CD55/NCKAP1L/TNF/SIRPA/SYK/PNP/CD300A/IL1A/ZC3H12A/IGF1/RASAL3/CCL5/RIPK2/MAP3K8/LILRB1/ALOX5/CCDC88B/PTPN6/SMAD…	97
BP	GO:0002683	negative regulation of immune system process	97/1285	449/18903	5.02e-25	9.71e-23	6.4e-23	CD74/PTPRC/LAPTM5/HLA-DRB1/GPX1/TYROBP/HLA-E/CCL3/C1QC/ID2/DUSP1/SAMSN1/HAVCR2/CD84/HMOX1/RPS19/LST1/HLA-B/LILRB4/ELF1/CD68/RHBDF2/CX3CR1/SOCS6/RUNX1/TREM2/SERPINB9/ARRB2/TNFAIP3/PTGER4/LGALS9/VSIG4/MAFB/FGL2/LYN/IFI16/CD86/CEBPA/INPP5D/SPI1/PELI1/TLR4/PRNP/TGFB1/TRIB1/CD55/NCKAP1L/RASSF5/SAMHD1/TNF/SYK/ATM/CD300A/ZC3H12A/PADI2/USP15/RIN3/BTK/GRN/INHBA/LILRB1/PTPN6/SMAD7/PTPRJ/HCK/MERTK/CEBPB/IRA…	97
BP	GO:0050900	leukocyte migration	96/1285	398/18903	1.15e-28	4.77e-26	3.14e-26	CD74/CSF1R/CCL3/AIF1/DUSP1/CCL4/ITGB2/DOCK8/CSF3R/IL1B/GPR183/FCER1G/HMOX1/RPS19/C3AR1/CX3CR1/CXCL16/CORO1A/CCL3L1/TREM2/CXCR4/PTGER4/SELPLG/P2RY12/LGALS9/PREX1/B4GALT1/LYN/LGMN/C5AR1/SPI1/CH25H/PDGFB/SERPINE1/NINJ1/PTAFR/PYCARD/ABL2/CCL3L3/NCKAP1L/ICAM1/CCR1/TNF/SIRPA/SYK/CD300A/IL1A/IL6R/PADI2/RHOG/IL17RA/RIN3/P2RX4/STK10/SPNS2/CCL5/ALOX5/TRPM2/HCK/SWAP70/CCL4L1/ADAM10/PDE4B/CXCL12/IL16/PIK3CG/…	96
BP	GO:0019221	cytokine-mediated signaling pathway	96/1285	496/18903	3.96e-21	5.22e-19	3.44e-19	CD74/PTPRC/LAPTM5/CSF1R/CCL3/CCL4/NFKBIA/HSPA1A/CSF3R/IL18/IL1B/CSF2RA/HSPA1B/FCER1G/LILRB4/CX3CR1/IL10RA/IFNGR1/CCL3L1/TREM2/CXCR4/TNFAIP3/IL13RA1/LYN/CEBPA/SPI1/PDGFB/IL6ST/PYCARD/CCL3L3/IRAK2/NAIP/CCR1/SAMHD1/TNF/OSM/SYK/IL1A/CYLD/TNFRSF1B/ACSL1/IL6R/PADI2/IL17RA/TMSB4X/UGCG/CASP1/IFNGR2/CCL5/RIPK2/LILRB1/SIRT1/PTPN6/IL1RAP/PTPRJ/HCK/CARD8/CCL4L1/IL1RN/IRAK3/PTPN2/BIRC3/CXCL12/TNFSF13B/IRF5/SH…	96
BP	GO:0050863	regulation of T cell activation	94/1285	376/18903	2.27e-29	1.2e-26	7.9e-27	CD74/PTPRC/LAPTM5/HLA-DRA/HLA-DRB1/CD83/HSPH1/HLA-E/HLA-DPA1/AIF1/HSPD1/HAVCR2/DOCK8/HLA-DPB1/JUNB/IL18/IL1B/HLA-DQB1/LILRB4/HLA-DMA/EGR3/SOCS6/RUNX1/CORO1A/NFKBID/HLA-DQA1/LGALS9/HLA-DMB/VSIG4/XBP1/FGL2/LYN/CD86/RPS3/NLRP3/PELI1/PRNP/IL6ST/PYCARD/HLA-DRB5/ABL2/NFKBIZ/CD55/NCKAP1L/SIRPA/SYK/PNP/CD300A/IL1A/TNFRSF1B/ZC3H12A/IGF1/PRDM1/RASAL3/CCL5/RIPK2/MAP3K8/LILRB1/CCDC88B/PTPN6/SMAD7/TFRC/CEBPB/…	94
BP	GO:0002443	leukocyte mediated immunity	92/1285	463/18903	4.2e-21	5.41e-19	3.57e-19	CD74/PTPRC/HLA-DRA/HLA-DRB1/TYROBP/C1QB/HLA-E/C3/CCL3/HLA-DPA1/C1QA/C1QC/HSPD1/ITGB2/HAVCR2/HLA-DPB1/IL18/IL1B/CTSC/HLA-DQB1/FCER1G/CD84/HMOX1/FCGR1A/HLA-B/FCGR3A/LILRB4/HLA-DMA/CLEC7A/CX3CR1/DDX21/CORO1A/TREM2/SERPINB9/HLA-DQA1/ARRB2/NR4A3/CTSH/LGALS9/STX4/HLA-DMB/LYN/INPP5D/NLRP3/SPI1/TLR4/LAT2/PTAFR/P2RX7/TGFB1/WAS/HLA-DRB5/CD55/NCKAP1L/ICAM1/TNF/SNAP23/SYK/CD300A/TNFRSF1B/ITGAM/STX7/VAMP8/BTK…	92
BP	GO:0051251	positive regulation of lymphocyte activation	91/1285	400/18903	3.11e-25	6.47e-23	4.27e-23	CD74/PTPRC/HLA-DRA/HLA-DRB1/CD83/TYROBP/HSPH1/HLA-E/HLA-DPA1/AIF1/HSPD1/HAVCR2/DOCK8/HLA-DPB1/IL18/IL1B/GPR183/HLA-DQB1/FCGR3A/LILRB4/HLA-DMA/CLEC7A/EGR3/RUNX1/CORO1A/NFKBID/HLA-DQA1/CDKN1A/LGALS9/HLA-DMB/XBP1/LYN/CD86/RPS3/INPP5D/NLRP3/IRS2/PELI1/TLR4/IL6ST/TGFB1/PYCARD/HLA-DRB5/ABL2/NFKBIZ/CD55/NCKAP1L/SIRPA/SYK/PNP/IL1A/IGF1/BTK/RASAL3/CCL5/RIPK2/MAP3K8/SLC39A10/LILRB1/CCDC88B/PTPN6/BLOC1S6/TF…	91
BP	GO:0030099	myeloid cell differentiation	91/1285	407/18903	1.17e-24	2.12e-22	1.4e-22	CD74/HLA-DRB1/TYROBP/CSF1R/CCL3/C1QC/ID2/HCLS1/KLF2/NFKBIA/HSPA1A/CSF3R/JUNB/HSPA1B/GPR183/RPS19/LILRB4/EVI2B/RUNX1/TREM2/IRF8/IKZF1/SCIN/KLF10/MAFB/LYN/IFI16/CEBPA/INPP5D/RPS6/PABPC4/FOS/SPI1/TLR4/ZFP36/TLR2/TGFB1/TRIB1/JUN/ABI1/NCKAP1L/RPS14/CCR1/TNF/JMJD6/TAL1/ALAS1/DNASE2/MAF/RASSF2/LRRK1/SLC11A2/RELB/INHBA/LILRB1/SIRT1/PTPN6/TFRC/CEBPB/PTPN2/PTBP3/FLI1/PKNOX1/MYC/SH2B3/IRF7/JAK2/TET2/SNX10/C…	91
BP	GO:1903706	regulation of hemopoiesis	91/1285	413/18903	3.55e-24	6.24e-22	4.11e-22	CD74/PTPRC/HLA-DRA/HLA-DRB1/CD83/TYROBP/ZFP36L2/CCL3/C1QC/ID2/HCLS1/NFKBIA/HSPA1A/CSF3R/JUNB/IL18/HSPA1B/HLA-B/LILRB4/EVI2B/EGR3/RUNX1/TREM2/NFKBID/SCIN/KLF10/LGALS9/MAFB/XBP1/FGL2/LYN/CD86/CEBPA/INPP5D/NLRP3/FOS/SPI1/TLR4/ZFP36/TGFB1/TRIB1/NFKBIZ/NCKAP1L/CCR1/TNF/SYK/PNP/ZC3H12A/TAL1/BTK/RASSF2/PRDM1/RIPK2/INHBA/LILRB1/PTPN6/SMAD7/CEBPB/PTPN2/MYC/IRF7/IRF1/GAS6/MALT1/HLA-DOA/CASP8/HSPA9/FBXW7/PP…	91
BP	GO:0070661	leukocyte proliferation	88/1285	348/18903	6.14e-28	2.22e-25	1.47e-25	CD74/PTPRC/HLA-DRB1/TYROBP/CSF1R/HLA-E/HLA-DPA1/AIF1/HSPD1/HAVCR2/DOCK8/HLA-DPB1/JUNB/IL18/IL1B/CSF2RA/ST6GAL1/GPR183/LST1/FCGR3A/LILRB4/CORO1A/TREM2/TNFAIP3/CDKN1A/LGALS9/SLC11A1/HLA-DMB/VSIG4/LYN/CD86/RPS3/INPP5D/RPS6/IRS2/PELI1/TLR4/DOCK2/PRNP/IL6ST/P2RX7/PYCARD/CD55/NCKAP1L/RASSF5/SYK/PNP/ATM/CD300A/IL1A/HHEX/TNFRSF1B/IGF1/BTK/RASAL3/PRKCD/CCL5/RIPK2/SLC39A10/LILRB1/CCDC88B/PTPN6/TFRC/CEBPB/I…	88
BP	GO:0002697	regulation of immune effector process	88/1285	379/18903	4.28e-25	8.56e-23	5.64e-23	CD74/PTPRC/LAPTM5/HLA-DRA/HLA-DRB1/TYROBP/HLA-E/C3/HSPD1/ITGB2/HAVCR2/JUNB/IL18/IL1B/CD84/HMOX1/FCGR1A/RPS19/HLA-B/LILRB4/CLEC7A/CX3CR1/DDX21/TREM2/NFKBID/SERPINB9/ARRB2/NR4A3/LGALS9/STX4/HLA-DMB/VSIG4/XBP1/LITAF/FGL2/LYN/CD86/NLRP3/SPI1/TLR4/PTAFR/P2RX7/TGFB1/PYCARD/WAS/NFKBIZ/CD55/SLC7A5/NCKAP1L/ICAM1/TNF/SYK/CD300A/TNFRSF1B/ZC3H12A/ITGAM/STX7/VAMP8/BTK/TLR7/NCF1/GRN/RIPK2/LILRB1/SIRT1/PTPN6/SM…	88
BP	GO:0030098	lymphocyte differentiation	88/1285	419/18903	6.53e-22	9.01e-20	5.94e-20	CD74/PTPRC/HLA-DRA/HLA-DRB1/CD83/ZFP36L2/ID2/JUNB/IL18/IL1B/GPR183/FCER1G/LILRB4/EGR3/RUNX1/NFKBID/IRF8/IKZF1/KLF6/PTGER4/LGALS9/PREX1/MAFB/XBP1/FGL2/CD86/INPP5D/RPS6/NLRP3/SPI1/DOCK2/LYL1/NFKBIZ/NCKAP1L/SYK/BLNK/PNP/ATM/IL1A/HHEX/DOCK10/ZC3H12A/IL6R/JMJD6/ST3GAL1/HDAC9/CHD7/BTK/NFIL3/PRDM1/RELB/RIPK2/INHBA/PTPN6/SMAD7/PTPRJ/MERTK/PTPN2/PKNOX1/TNFSF13B/PLCG2/VAV1/IRF1/EZH2/GAS6/MALT1/HLA-DOA/IL4I…	88
BP	GO:0022409	positive regulation of cell-cell adhesion	87/1285	322/18903	6.74e-30	3.91e-27	2.58e-27	CD74/PTPRC/HLA-DRA/HLA-DRB1/CD83/HSPH1/HLA-E/HLA-DPA1/AIF1/HSPD1/ITGB2/HAVCR2/DOCK8/HLA-DPB1/IL18/IL1B/HLA-DQB1/LILRB4/HLA-DMA/EGR3/RUNX1/CORO1A/NFKBID/HLA-DQA1/NR4A3/LGALS9/HLA-DMB/XBP1/LYN/CD86/RPS3/NLRP3/PLAUR/IL6ST/PTAFR/PYCARD/HLA-DRB5/ABL2/NFKBIZ/CD55/NCKAP1L/TNF/SIRPA/SYK/PNP/IL1A/IGF1/PDPN/RASAL3/CCL5/RIPK2/MAP3K8/LILRB1/ALOX5/CCDC88B/PTPN6/SMAD7/PIEZO1/TFRC/ICOSLG/MMRN1/TNFSF13B/TMIGD2/J…	87
BP	GO:0033674	positive regulation of kinase activity	87/1285	496/18903	1.81e-16	1.44e-14	9.46e-15	CD74/PTPRC/HLA-DRB1/CSF1R/HSP90AA1/IL18/IL1B/HSP90AB1/STK4/FCGR1A/RPLP1/TREM2/CDKN1A/P2RY12/SLC11A1/LYN/CD86/RPS3/TLR4/NPM1/PDGFB/PRNP/ADRB2/P2RX7/TGFB1/FGD2/ABI1/NCKAP1L/MAP2K3/TNF/CCDC88A/SYK/PRKAG2/CD300A/CKS2/TAOK3/ACSL1/PAK1/IL6R/LCP2/SYAP1/AKAP13/TAB2/IGF1/SNCA/TLR6/RASSF2/NCF1/PRKCD/CCL5/SIRT1/MERTK/ERN1/MOB1A/RANBP2/TNFRSF10B/MAP3K5/PIH1D1/MMD/JAK2/PIK3CG/SNX9/WNK1/EZH2/GAS6/PIK3R5/DAZAP2…	87
BP	GO:0002237	response to molecule of bacterial origin	86/1285	360/18903	1.85e-25	4.13e-23	2.72e-23	CCL3/NFKBIA/HAVCR2/SOD2/IL18/IL1B/CD68/CX3CR1/IL10RA/TREM2/NR4A1/IRF8/TNFAIP3/PTGER4/LGALS9/SLC11A1/LY86/XBP1/LITAF/LYN/CD86/C5AR1/NLRP3/NFKB1/FOS/SPI1/PELI1/TLR4/ZFP36/MIR142/TLR2/CD14/SERPINE1/PTAFR/P2RX7/TGFB1/PYCARD/TRIB1/CD55/SLC7A5/IRAK2/MAP2K3/JUND/TNF/SIRPA/IL1A/TNFRSF1B/ZC3H12A/PTGS2/TAB2/TLR1/LY96/BTK/SNCA/TLR6/CASP1/CCL5/RIPK2/LILRB1/GCH1/HCK/RPS6KA3/CEBPB/ARID5A/CARD8/PDE4B/IRAK3/IRF5…	86
BP	GO:0050727	regulation of inflammatory response	84/1285	414/18903	5.88e-20	7.11e-18	4.68e-18	PTPRC/HLA-DRB1/GPX1/HLA-E/C3/CCL3/NFKBIA/NEAT1/IL18/IL1B/CTSC/FCGR1A/RPS19/RHBDF2/ALOX5AP/TREM2/TNFAIP3/PTGER4/LYN/CEBPA/NLRP3/NFKB1/TLR4/SIGLEC10/ZFP36/MIR142/TLR2/IL6ST/SERPINE1/NINJ1/KLF4/PYCARD/NFKBIZ/NAIP/AOAH/TNF/SERPINF1/OSM/SIRPA/SYK/ATM/CYLD/TNFRSF1B/DAGLB/PTGS2/SOCS3/IGF1/VAMP8/IL17RA/TMSB4X/BTK/SNCA/TLR7/NCF1/GRN/CASP1/PRKCD/CCL5/ALOX5/METRNL/HCK/APOE/CEBPB/PTPN2/BIRC3/PIK3AP1/IL16/PLC…	84
BP	GO:0032943	mononuclear cell proliferation	82/1285	312/18903	2.47e-27	8.42e-25	5.55e-25	CD74/PTPRC/HLA-DRB1/TYROBP/HLA-E/HLA-DPA1/AIF1/HSPD1/HAVCR2/DOCK8/HLA-DPB1/IL18/IL1B/ST6GAL1/GPR183/LST1/FCGR3A/LILRB4/CORO1A/CDKN1A/LGALS9/SLC11A1/HLA-DMB/VSIG4/LYN/CD86/RPS3/INPP5D/RPS6/IRS2/PELI1/TLR4/DOCK2/PRNP/IL6ST/P2RX7/PYCARD/CD55/NCKAP1L/RASSF5/SYK/PNP/ATM/CD300A/IL1A/TNFRSF1B/IGF1/BTK/RASAL3/PRKCD/CCL5/RIPK2/SLC39A10/LILRB1/CCDC88B/PTPN6/TFRC/CEBPB/ICOSLG/TNFSF13B/TMIGD2/JAK2/PIK3CG/IRF…	82
BP	GO:0032496	response to lipopolysaccharide	82/1285	339/18903	1.05e-24	1.96e-22	1.29e-22	CCL3/NFKBIA/HAVCR2/SOD2/IL18/IL1B/CD68/CX3CR1/IL10RA/TREM2/NR4A1/IRF8/TNFAIP3/PTGER4/LGALS9/SLC11A1/LY86/XBP1/LITAF/LYN/CD86/NLRP3/NFKB1/FOS/SPI1/PELI1/TLR4/ZFP36/MIR142/TLR2/CD14/SERPINE1/PTAFR/P2RX7/TGFB1/PYCARD/TRIB1/CD55/SLC7A5/IRAK2/MAP2K3/JUND/TNF/SIRPA/IL1A/TNFRSF1B/ZC3H12A/PTGS2/TAB2/LY96/BTK/SNCA/CASP1/CCL5/RIPK2/LILRB1/GCH1/HCK/RPS6KA3/CEBPB/ARID5A/CARD8/PDE4B/IRAK3/PLCG2/HAMP/JAK2/NFKB…	82
BP	GO:0046651	lymphocyte proliferation	80/1285	305/18903	1.25e-26	3.46e-24	2.28e-24	CD74/PTPRC/HLA-DRB1/TYROBP/HLA-E/HLA-DPA1/AIF1/HSPD1/HAVCR2/DOCK8/HLA-DPB1/IL18/IL1B/GPR183/LST1/FCGR3A/LILRB4/CORO1A/CDKN1A/LGALS9/SLC11A1/HLA-DMB/VSIG4/LYN/CD86/RPS3/INPP5D/RPS6/IRS2/PELI1/TLR4/DOCK2/PRNP/IL6ST/P2RX7/PYCARD/CD55/NCKAP1L/RASSF5/SYK/PNP/ATM/CD300A/IL1A/TNFRSF1B/IGF1/BTK/RASAL3/PRKCD/CCL5/RIPK2/SLC39A10/LILRB1/CCDC88B/PTPN6/TFRC/CEBPB/ICOSLG/TNFSF13B/TMIGD2/JAK2/PIK3CG/IRF1/TNFRSF…	80
BP	GO:0060326	cell chemotaxis	80/1285	319/18903	3.13e-25	6.47e-23	4.27e-23	CD74/CSF1R/CCL3/AIF1/DUSP1/CCL4/ITGB2/CSF3R/IL1B/DOCK4/GPR183/FCER1G/RPS19/C3AR1/CX3CR1/EGR3/CXCL16/CORO1A/CCL3L1/NR4A1/CXCR4/ARRB2/LGALS9/PREX1/LYN/LGMN/BIN2/C5AR1/SPI1/CH25H/PDGFB/SERPINE1/NINJ1/CCL3L3/NCKAP1L/CCR1/SYK/IL6R/PADI2/RHOG/IL17RA/RIN3/TMSB4X/P2RX4/PRKCD/CCL5/ALOX5/TRPM2/SWAP70/CCL4L1/ADAM10/PDE4B/CXCL12/IL16/CCRL2/PIK3CG/VAV1/WNK1/GPSM3/GAS6/LYST/OXSR1/RAC2/TREM1/RAC1/SLC8B1/EDN1/MM…	80
BP	GO:0045860	positive regulation of protein kinase activity	80/1285	420/18903	2.34e-17	2.09e-15	1.38e-15	PTPRC/CSF1R/HSP90AA1/IL18/IL1B/HSP90AB1/STK4/FCGR1A/RPLP1/CDKN1A/SLC11A1/CD86/RPS3/TLR4/NPM1/PDGFB/PRNP/ADRB2/P2RX7/TGFB1/FGD2/ABI1/NCKAP1L/MAP2K3/TNF/CCDC88A/SYK/PRKAG2/CD300A/CKS2/TAOK3/ACSL1/PAK1/IL6R/LCP2/SYAP1/AKAP13/TAB2/IGF1/SNCA/TLR6/RASSF2/NCF1/PRKCD/CCL5/SIRT1/ERN1/MOB1A/TNFRSF10B/MAP3K5/PIH1D1/MMD/JAK2/PIK3CG/SNX9/WNK1/EZH2/GAS6/PIK3R5/DAZAP2/MALT1/CACUL1/DDX3X/FBXW7/TLR3/EDN1/DBF4/EGR…	80
BP	GO:1903039	positive regulation of leukocyte cell-cell adhesion	79/1285	275/18903	3.36e-29	1.62e-26	1.07e-26	CD74/PTPRC/HLA-DRA/HLA-DRB1/CD83/HSPH1/HLA-E/HLA-DPA1/AIF1/HSPD1/ITGB2/HAVCR2/DOCK8/HLA-DPB1/IL18/IL1B/HLA-DQB1/LILRB4/HLA-DMA/EGR3/RUNX1/CORO1A/NFKBID/HLA-DQA1/NR4A3/LGALS9/HLA-DMB/XBP1/LYN/CD86/RPS3/NLRP3/IL6ST/PTAFR/PYCARD/HLA-DRB5/ABL2/NFKBIZ/CD55/NCKAP1L/TNF/SIRPA/SYK/PNP/IL1A/IGF1/RASAL3/CCL5/RIPK2/MAP3K8/LILRB1/ALOX5/CCDC88B/PTPN6/TFRC/ICOSLG/TNFSF13B/TMIGD2/JAK2/VAV1/TNFRSF13C/HLA-A/MALT1…	79
BP	GO:0002274	myeloid leukocyte activation	78/1285	237/18903	2.39e-33	2.77e-30	1.83e-30	CD74/PTPRC/TYROBP/CCL3/C1QA/AIF1/HSPD1/ITGB2/HAVCR2/IL18/CTSC/FCER1G/CD84/HMOX1/FCGR3A/LILRB4/CX3CR1/IFNGR1/TREM2/NR4A3/LGALS9/SLC11A1/STX4/VSIG4/PREX1/LYN/CEBPA/C5AR1/SPI1/TLR4/MIR142/LAT2/DOCK2/TLR2/PTAFR/PYCARD/JUN/JUND/TNF/SNAP23/SYK/ATM/CD300A/ZC3H12A/LCP2/JMJD6/ITGAM/TLR1/VAMP8/BTK/SNCA/TLR6/GRN/IFNGR2/PRKCD/CCL5/RELB/PTPN6/NDRG1/TMEM106A/STXBP2/ADAM10/PLCG2/HAMP/JAK2/PIK3CG/LDLR/CD33/RAC2/…	78
BP	GO:0002366	leukocyte activation involved in immune response	78/1285	293/18903	1.91e-26	5.03e-24	3.31e-24	CD74/PTPRC/HLA-DRA/HLA-DRB1/APBB1IP/TYROBP/CCL3/HSPD1/ITGB2/HAVCR2/JUNB/IL18/LCP1/GPR183/FCER1G/CD84/HMOX1/FCGR3A/CX3CR1/CORO1A/TREM2/NFKBID/IRF8/PTGER4/NR4A3/LGALS9/SLC11A1/STX4/HLA-DMB/XBP1/FGL2/LYN/CD86/RPS6/NLRP3/SPI1/TLR4/LAT2/DOCK2/PTAFR/TGFB1/PYCARD/NFKBIZ/NCKAP1L/ICAM1/SNAP23/SYK/CD300A/DOCK10/ZC3H12A/IL6R/ITGAM/ST3GAL1/VAMP8/BTK/GRN/RELB/RIPK2/LILRB1/PTPN6/SMAD7/TFRC/SWAP70/ERCC1/STXBP2/…	78
BP	GO:0002263	cell activation involved in immune response	78/1285	297/18903	4.99e-26	1.26e-23	8.3e-24	CD74/PTPRC/HLA-DRA/HLA-DRB1/APBB1IP/TYROBP/CCL3/HSPD1/ITGB2/HAVCR2/JUNB/IL18/LCP1/GPR183/FCER1G/CD84/HMOX1/FCGR3A/CX3CR1/CORO1A/TREM2/NFKBID/IRF8/PTGER4/NR4A3/LGALS9/SLC11A1/STX4/HLA-DMB/XBP1/FGL2/LYN/CD86/RPS6/NLRP3/SPI1/TLR4/LAT2/DOCK2/PTAFR/TGFB1/PYCARD/NFKBIZ/NCKAP1L/ICAM1/SNAP23/SYK/CD300A/DOCK10/ZC3H12A/IL6R/ITGAM/ST3GAL1/VAMP8/BTK/GRN/RELB/RIPK2/LILRB1/PTPN6/SMAD7/TFRC/SWAP70/ERCC1/STXBP2/…	78
BP	GO:1902105	regulation of leukocyte differentiation	78/1285	317/18903	4.65e-24	7.93e-22	5.23e-22	CD74/PTPRC/HLA-DRA/HLA-DRB1/CD83/TYROBP/ZFP36L2/CCL3/C1QC/ID2/HCLS1/JUNB/IL18/HLA-B/LILRB4/EVI2B/EGR3/RUNX1/TREM2/NFKBID/KLF10/LGALS9/MAFB/XBP1/FGL2/LYN/CD86/INPP5D/NLRP3/FOS/TLR4/TGFB1/TRIB1/NFKBIZ/NCKAP1L/CCR1/TNF/SYK/PNP/ZC3H12A/BTK/RASSF2/PRDM1/RIPK2/INHBA/LILRB1/PTPN6/SMAD7/CEBPB/PTPN2/MYC/IRF7/IRF1/GAS6/MALT1/HLA-DOA/CASP8/FBXW7/PPP3CA/IL4I1/PIK3R1/ZFP36L1/TLR3/CARD11/RHOH/PRKCA/DUSP10/ZBTB…	78
BP	GO:0002460	adaptive immune response based on somatic recombination of immune receptors built from immunoglobulin superfamily domains	78/1285	375/18903	2.8e-19	2.95e-17	1.94e-17	CD74/PTPRC/HLA-DRA/HLA-DRB1/C1QB/HLA-E/C3/HLA-DPA1/C1QA/C1QC/HSPD1/HAVCR2/HLA-DPB1/JUNB/IL18/IL1B/CTSC/HLA-DQB1/FCER1G/FCGR1A/HLA-B/FCGR3A/LILRB4/HLA-DMA/CLEC7A/TREM2/NFKBID/HLA-DQA1/TNFAIP3/CTSH/SLC11A1/HLA-DMB/INPP5D/NLRP3/TLR4/KLHL6/P2RX7/TGFB1/WAS/HLA-DRB5/NFKBIZ/CD55/NCKAP1L/ICAM1/TNF/TNFRSF1B/ZC3H12A/IL6R/NFKB2/STX7/IL17RA/BTK/PRKCD/RELB/RIPK2/LILRB1/PTPN6/SMAD7/TFRC/SWAP70/ARID5A/ERCC1/C2/…	78
BP	GO:0043410	positive regulation of MAPK cascade	78/1285	496/18903	2.53e-12	1.01e-10	6.67e-11	CD74/PTPRC/LAPTM5/HLA-DRB1/CSF1R/CCL3/CCL4/HAVCR2/IL1B/GPR183/GADD45B/CCL3L1/TREM2/ARRB2/LGALS9/RPS3/C5AR1/SPI1/TLR4/PDGFB/ADRB2/P2RX7/TGFB1/PYCARD/JUN/FGD2/CCL3L3/NAIP/SDCBP/ICAM1/MAP2K3/CCR1/TNF/OSM/SYK/IL1A/TAOK3/PAK1/ZC3H12A/AKAP13/IGF1/TLR6/TGFBR1/RASSF2/NCF1/CCL5/RIPK2/INHBA/PTPRJ/APOE/ERN1/TMEM106A/CCL4L1/MAP3K5/CFLAR/PLCG2/JAK2/PIK3CG/GNAI2/EZH2/GAS6/PIK3R5/SCIMP/FBXW7/TLR3/EDN1/WNT5A/CCL…	78
BP	GO:0002181	cytoplasmic translation	75/1285	161/18903	1.53e-44	8.88e-41	5.85e-41	PABPC1/RPS2/RPS19/RPL39/RPS24/RPS20/RPL28/RPLP1/RPL37/RPS12/RPS11/RPL36A/RPLP2/EIF5/RPS3/RPS23/UBA52/RPS6/RPL18A/RPS29/RPL31/RPL13A/RPL27A/RPL13/RPL12/RPL23/RPL3/RPS15A/RPL38/RPL34/RPS14/RPL11/RPS21/RPS13/RPLP0/EIF4A1/RPL22L1/RPL26/RPL4/RPL32/RPS8/RPSA/RPL30/RPS3A/RPL27/ETF1/RPS27A/RPS18/RPL10/RPS4X/RPS10/CPEB4/RPS9/RPS16/RPL21/RPL36/HNRNPU/RPL19/RPL18/RPS28/RPL29/RPL14/RPL9/RPL5/RPL15/RPL17/FAU/…	75
BP	GO:0070663	regulation of leukocyte proliferation	75/1285	269/18903	7.37e-27	2.31e-24	1.52e-24	CD74/PTPRC/HLA-DRB1/TYROBP/CSF1R/HLA-E/HLA-DPA1/AIF1/HAVCR2/HLA-DPB1/IL18/IL1B/CSF2RA/ST6GAL1/GPR183/LST1/FCGR3A/LILRB4/CORO1A/TNFAIP3/CDKN1A/LGALS9/HLA-DMB/VSIG4/LYN/CD86/RPS3/INPP5D/IRS2/PELI1/TLR4/PRNP/IL6ST/PYCARD/CD55/NCKAP1L/RASSF5/SYK/PNP/ATM/CD300A/IL1A/HHEX/TNFRSF1B/IGF1/BTK/RASAL3/CCL5/RIPK2/SLC39A10/LILRB1/CCDC88B/PTPN6/TFRC/CEBPB/ICOSLG/TNFSF13B/TMIGD2/JAK2/IRF1/TNFRSF13C/HLA-A/EBI3/A…	75
BP	GO:0050870	positive regulation of T cell activation	74/1285	251/18903	3.27e-28	1.26e-25	8.33e-26	CD74/PTPRC/HLA-DRA/HLA-DRB1/CD83/HSPH1/HLA-E/HLA-DPA1/AIF1/HSPD1/HAVCR2/DOCK8/HLA-DPB1/IL18/IL1B/HLA-DQB1/LILRB4/HLA-DMA/EGR3/RUNX1/CORO1A/NFKBID/HLA-DQA1/LGALS9/HLA-DMB/XBP1/LYN/CD86/RPS3/NLRP3/IL6ST/PYCARD/HLA-DRB5/ABL2/NFKBIZ/CD55/NCKAP1L/SIRPA/SYK/PNP/IL1A/IGF1/RASAL3/CCL5/RIPK2/MAP3K8/LILRB1/CCDC88B/PTPN6/TFRC/ICOSLG/TNFSF13B/TMIGD2/JAK2/VAV1/TNFRSF13C/HLA-A/MALT1/HLA-DOA/EBI3/PPP3CA/IL4I1/C…	74
BP	GO:0032102	negative regulation of response to external stimulus	73/1285	436/18903	5.78e-13	2.53e-11	1.67e-11	PTPRC/HLA-DRB1/GPX1/HLA-E/SPP1/AIF1/DUSP1/HAVCR2/ST6GAL1/RPS19/HLA-B/RHBDF2/HTRA1/TREM2/SERPINB9/ARRB2/TNFAIP3/PTGER4/LGALS9/VSIG4/FGL2/LYN/IFI16/NLRP3/NFKB1/SIGLEC10/ZFP36/MIR142/PDGFB/PLAUR/SERPINE1/KLF4/TRIB1/SEMA4D/AOAH/SAMHD1/TNF/SERPINF1/SIRPA/SYK/CYLD/TNFRSF1B/PADI2/SOCS3/TRIM38/USP15/IGF1/RIN3/GRN/PRKCD/GRID2/LILRB1/RNF125/ALOX5/METRNL/HCK/APOE/CARD8/MMRN1/IRAK3/PTPN2/SH2B3/PARP14/HAMP/PL…	73
BP	GO:0045936	negative regulation of phosphate metabolic process	72/1285	440/18903	2.61e-12	1.04e-10	6.84e-11	PTPRC/SORL1/RGS2/DUSP1/SAMSN1/PLEK/IL1B/DNAJA1/PPP1R15A/GADD45B/LILRB4/APOC1/ARRB2/TNFAIP3/CDKN1A/CHORDC1/LYN/CEBPA/PPP1R15B/IRS2/SLC8A1/NPM1/PDGFB/PRNP/LDLRAD4/TGFB1/PYCARD/TRIB1/JUN/SEMA4D/NCKAP1L/TNF/SIRPA/PRKAG2/CD300A/HHEX/ZC3H12A/MIDN/SOCS3/GNAQ/SNCA/DDIT4/RASSF2/HNRNPU/LRRK1/PRKCD/C9orf72/INHBA/SIRT1/PTPN6/SMAD7/PTPRJ/MLXIPL/APOE/SWAP70/IRAK3/PTPN2/PIK3IP1/MICAL1/SH2B3/PARP14/DUSP6/GNAI2/N…	72
BP	GO:0010563	negative regulation of phosphorus metabolic process	72/1285	441/18903	2.92e-12	1.15e-10	7.59e-11	PTPRC/SORL1/RGS2/DUSP1/SAMSN1/PLEK/IL1B/DNAJA1/PPP1R15A/GADD45B/LILRB4/APOC1/ARRB2/TNFAIP3/CDKN1A/CHORDC1/LYN/CEBPA/PPP1R15B/IRS2/SLC8A1/NPM1/PDGFB/PRNP/LDLRAD4/TGFB1/PYCARD/TRIB1/JUN/SEMA4D/NCKAP1L/TNF/SIRPA/PRKAG2/CD300A/HHEX/ZC3H12A/MIDN/SOCS3/GNAQ/SNCA/DDIT4/RASSF2/HNRNPU/LRRK1/PRKCD/C9orf72/INHBA/SIRT1/PTPN6/SMAD7/PTPRJ/MLXIPL/APOE/SWAP70/IRAK3/PTPN2/PIK3IP1/MICAL1/SH2B3/PARP14/DUSP6/GNAI2/N…	72
BP	GO:0032944	regulation of mononuclear cell proliferation	71/1285	243/18903	7.57e-27	2.31e-24	1.52e-24	CD74/PTPRC/HLA-DRB1/TYROBP/HLA-E/HLA-DPA1/AIF1/HAVCR2/HLA-DPB1/IL18/IL1B/ST6GAL1/GPR183/LST1/FCGR3A/LILRB4/CORO1A/CDKN1A/LGALS9/HLA-DMB/VSIG4/LYN/CD86/RPS3/INPP5D/IRS2/PELI1/TLR4/PRNP/IL6ST/PYCARD/CD55/NCKAP1L/RASSF5/SYK/PNP/ATM/CD300A/IL1A/TNFRSF1B/IGF1/BTK/RASAL3/CCL5/RIPK2/SLC39A10/LILRB1/CCDC88B/PTPN6/TFRC/CEBPB/ICOSLG/TNFSF13B/TMIGD2/JAK2/IRF1/TNFRSF13C/HLA-A/EBI3/ARG2/PPP3CA/IL4I1/RAC2/NFAT…	71
BP	GO:0071900	regulation of protein serine/threonine kinase activity	71/1285	395/18903	3.31e-14	1.78e-12	1.17e-12	PTPRC/CSF1R/SORL1/RGS2/DUSP1/IL1B/HSP90AB1/DNAJA1/STK4/TNFAIP3/CDKN1A/CCNL1/CHORDC1/LYN/RPS3/CEBPA/SLC8A1/TLR4/PDGFB/CCNH/ADRB2/P2RX7/TGFB1/PYCARD/TRIB1/FGD2/TNF/SYK/PRKAG2/CD300A/CKS2/HHEX/TAOK3/ACSL1/PAK1/SYAP1/AKAP13/SNCA/TLR6/PRKCD/SIRT1/PTPN6/PTPRJ/APOE/ERN1/IRAK3/MAP3K5/GTPBP4/PIH1D1/SH2B3/DAB2/PIK3CG/EZH2/PIK3R5/DAZAP2/NUP62/DDX3X/UVRAG/EDN1/IPO7/DBF4/WNT5A/DUSP10/PROX1/ADAM17/PDCD4/MAP3K1…	71
BP	GO:0052547	regulation of peptidase activity	71/1285	459/18903	5.4e-11	1.67e-09	1.1e-09	LAPTM5/GPX1/C3/CTSB/SORL1/HSPD1/BIN1/DNAJB6/RHBDF2/HSPE1/CLEC7A/PMAIP1/NR4A1/SERPINB9/ARRB2/CTSH/LGALS9/LYN/IFI16/LGMN/RPS3/MBP/NLRP3/PLAUR/PRNP/SERPINE1/KLF4/PYCARD/NAIP/TNF/SERPINF1/SYK/PTGS2/SERPINA1/ARL6IP1/SNCA/GRN/CASP1/RPS6KA1/RIPK2/PSME4/SIRT1/RPS6KA3/TNFSF10/CARD8/SPINT2/SIAH2/CST3/APAF1/MAP3K5/BIRC3/MICAL1/MYC/PIH1D1/CFLAR/CASP10/JAK2/GAS6/NLRP1/MALT1/CASP8/DDX3X/TANK/AKIRIN2/PICALM/CRY…	71
BP	GO:2001233	regulation of apoptotic signaling pathway	70/1285	374/18903	6.19e-15	3.78e-13	2.49e-13	CD74/PTPRC/GPX1/SKIL/NR4A2/HSPA1A/SOD2/IL1B/CTSC/HSPA1B/TPT1/DNAJA1/STK4/HMOX1/CX3CR1/PMAIP1/MCL1/TREM2/ARRB2/TNFAIP3/CTSH/STX4/IVNS1ABP/XBP1/RPS3/G0S2/PLAUR/SERPINE1/PYCARD/HERPUD1/RPL11/ICAM1/UBB/TNF/RPL26/IL1A/CYLD/PPIF/PTGS2/IGF1/SFPQ/TGFBR1/ATF3/PRKCD/INHBA/DEDD2/SIRT1/TNFSF10/ARHGEF2/SIAH2/APAF1/PTPN2/CXCL12/MYC/PIH1D1/DDIT3/CFLAR/JAK2/TNFRSF12A/GNAI2/NFE2L2/DDX3X/FBXW7/TMC8/DEPTOR/MDM2/ITP…	70
BP	GO:0042060	wound healing	70/1285	442/18903	2.49e-11	8.43e-10	5.55e-10	GPX1/PLEK/FCER1G/HMOX1/CLEC7A/ARHGAP24/CXCR4/TNFAIP3/CDKN1A/P2RY12/SLC11A1/B4GALT1/XBP1/LYN/PABPC4/TLR4/PDGFB/PLAUR/IL6ST/SERPINE1/GNA13/TGFB1/WAS/TNF/ENTPD1/SYK/ELK3/IL1A/PAK1/CHMP1B/FERMT3/SERPINA1/IGF1/RAP2B/GNAQ/PDPN/TGFBR1/MIR29A/PRKCD/ALOX5/PTPN6/BLOC1S6/MERTK/APOE/MMRN1/ITGA5/MAP3K5/JMJD1C/SH2B3/CFLAR/PLCG2/JAK2/PIK3CG/TNFRSF12A/VAV1/GAS6/NFE2L2/PPP3CA/PLA2G4A/EDN1/S100A10/WNT5A/GNAS/PRKCA…	70
BP	GO:0050670	regulation of lymphocyte proliferation	69/1285	239/18903	8.81e-26	2.13e-23	1.4e-23	CD74/PTPRC/HLA-DRB1/TYROBP/HLA-E/HLA-DPA1/AIF1/HAVCR2/HLA-DPB1/IL18/IL1B/GPR183/LST1/FCGR3A/LILRB4/CORO1A/CDKN1A/LGALS9/HLA-DMB/VSIG4/LYN/CD86/RPS3/INPP5D/IRS2/PELI1/TLR4/PRNP/IL6ST/PYCARD/CD55/NCKAP1L/RASSF5/SYK/PNP/ATM/CD300A/IL1A/TNFRSF1B/IGF1/BTK/RASAL3/CCL5/RIPK2/SLC39A10/LILRB1/CCDC88B/PTPN6/TFRC/CEBPB/ICOSLG/TNFSF13B/TMIGD2/JAK2/IRF1/TNFRSF13C/HLA-A/EBI3/ARG2/PPP3CA/IL4I1/RAC2/NFATC2/CARD1…	69
BP	GO:0030595	leukocyte chemotaxis	69/1285	240/18903	1.16e-25	2.68e-23	1.77e-23	CD74/CSF1R/CCL3/AIF1/DUSP1/CCL4/ITGB2/CSF3R/IL1B/GPR183/FCER1G/RPS19/C3AR1/CX3CR1/CXCL16/CORO1A/CCL3L1/CXCR4/LGALS9/PREX1/LYN/LGMN/C5AR1/SPI1/CH25H/PDGFB/SERPINE1/NINJ1/CCL3L3/NCKAP1L/CCR1/SYK/IL6R/PADI2/IL17RA/RIN3/CCL5/ALOX5/TRPM2/SWAP70/CCL4L1/ADAM10/PDE4B/CXCL12/IL16/PIK3CG/VAV1/WNK1/GPSM3/GAS6/LYST/OXSR1/RAC2/TREM1/RAC1/SLC8B1/EDN1/MMP2/WNT5A/CCL2/TNFSF14/ADAM17/MPP1/CCL20/NEDD9/CSF1/FLT1/VE…	69
BP	GO:0051090	regulation of DNA-binding transcription factor activity	69/1285	454/18903	2.23e-10	6.29e-09	4.14e-09	SGK1/ID2/HCLS1/NFKBIA/HAVCR2/HSPA1A/IL18/IL1B/HSPA1B/ADORA3/HMOX1/CLEC7A/CX3CR1/ARRB2/TNFAIP3/LGALS9/RPS3/NLRP3/SPI1/PELI1/TLR4/NPM1/TLR2/PRNP/KLF4/PYCARD/TRIB1/IRAK2/TNF/SYK/NFKBIE/CYLD/SIK1/ZC3H12A/LPAR5/TRIM38/TMSB4X/BTK/TLR6/RIPK2/SIRT1/SMAD7/IL1RAP/HCK/TFRC/CARD8/ARHGEF2/BHLHE40/IRAK3/CYTL1/DDIT3/CFLAR/PLCG2/JAK2/TRIM22/EZH2/GAS6/NFKBIB/MALT1/PPP3CA/TLR3/EDN1/CARD11/WNT5A/PIM1/PRKCH/PROX1/HE…	69
BP	GO:0071216	cellular response to biotic stimulus	68/1285	261/18903	1.27e-22	1.94e-20	1.28e-20	CCL3/NFKBIA/HAVCR2/IL18/IL1B/CD68/CLEC7A/CX3CR1/TREM2/IRF8/TNFAIP3/LY86/XBP1/LITAF/LYN/CD86/PPP1R15B/NLRP3/NFKB1/SPI1/TLR4/ZFP36/TLR2/CD14/SERPINE1/PTAFR/TGFB1/PYCARD/TRIB1/CD55/SLC7A5/IRAK2/MAP2K3/TNF/SIRPA/SYK/IL1A/TNFRSF1B/ZC3H12A/TLR1/LY96/BTK/TLR6/CASP1/HSPA5/CCL5/RIPK2/LILRB1/HCK/CEBPB/ARID5A/CARD8/PDE4B/APAF1/DDIT3/PLCG2/HAMP/JAK2/NFKBIB/MALT1/SCIMP/WNT5A/CCL2/PRKCA/PDCD4/BCL2L11/MEF2C/ABC…	68
BP	GO:0002253	activation of immune response	68/1285	397/18903	1.23e-12	5e-11	3.3e-11	PTPRC/LAPTM5/HLA-DRB1/TYROBP/C1QB/C3/C1QA/HSP90AA1/C1QC/HLA-DPB1/IL1B/HLA-DQB1/FCER1G/LILRB4/ELF1/C3AR1/CLEC7A/TREM2/NFKBID/NR4A3/VSIG4/LYN/IFI16/RPS3/C5AR1/INPP5D/TLR4/FPR1/LAT2/PRNP/KLHL6/PYCARD/NFKBIZ/CD55/NCKAP1L/SYK/BLNK/CD300A/PAK1/ZC3H12A/LCP2/SFPQ/BTK/PRKCD/RIPK2/SLC39A10/CACNB4/THEMIS2/PTPN6/PTPRJ/HCK/ICOSLG/PDE4B/C2/PTPN2/LPXN/PLCG2/VAV1/WNK1/APPL2/HLA-A/MALT1/NFATC2/CARD11/PLCL2/CFD/PR…	68
BP	GO:0044089	positive regulation of cellular component biogenesis	68/1285	498/18903	2.69e-08	4.95e-07	3.26e-07	HSP90AA1/HSPA1A/PLEK/BIN1/LCP1/HSPA1B/CLEC7A/NAV3/P2RY12/FSCN1/RPS3/TLR4/P2RX7/TGFB1/PYCARD/SEMA4D/GRB2/MAP4K4/NCKAP1L/SDCBP/PDE4DIP/TNF/CCDC88A/SYK/ACTR3/ATM/PAK1/ARPC2/TAL1/CYFIP1/SNCA/FNIP2/TLR6/TGFBR1/SYNDIG1/ACTR2/GRID2/ATF7IP2/IL1RAP/PTPRJ/PIEZO1/HCK/TFRC/BAIAP2/SWAP70/FMN1/ERCC1/FCHSD2/PIH1D1/LIMS1/PLCG2/SNX9/NUP62/DDX3X/RAC2/PIK3R1/RAC1/NDEL1/GPR65/S100A10/PRKCA/ARAP1/BID/SETDB2/BCL2L11/P…	68
BP	GO:0002699	positive regulation of immune effector process	67/1285	261/18903	6.42e-22	9.01e-20	5.94e-20	CD74/PTPRC/LAPTM5/HLA-DRA/HLA-DRB1/TYROBP/HLA-E/C3/HSPD1/ITGB2/IL18/IL1B/CD84/HMOX1/FCGR1A/RPS19/HLA-B/CLEC7A/DDX21/TREM2/NFKBID/NR4A3/LGALS9/STX4/HLA-DMB/XBP1/LYN/CD86/NLRP3/SPI1/TLR4/PTAFR/P2RX7/TGFB1/PYCARD/NFKBIZ/CD55/SLC7A5/TNF/SYK/CD300A/ITGAM/STX7/VAMP8/BTK/TLR7/RIPK2/LILRB1/SIRT1/PTPN6/PTPRJ/TFRC/ARID5A/STXBP2/PLCG2/VAV1/APPL2/HLA-A/MALT1/SCIMP/RAC2/TLR3/GAB2/WNT5A/ZBTB1/HLX/ANXA1	67
BP	GO:0002831	regulation of response to biotic stimulus	67/1285	361/18903	3.64e-14	1.92e-12	1.26e-12	HLA-DRB1/TYROBP/HLA-E/HSP90AA1/HSPD1/HAVCR2/IL1B/RPS19/HLA-B/CLEC7A/HTRA1/TREM2/SERPINB9/ARRB2/TNFAIP3/LGALS9/VSIG4/LY86/FGL2/LYN/IFI16/SPI1/TLR4/CD14/PYCARD/TRIB1/CD55/SAMHD1/SYK/PAK1/ZC3H12A/TRIM38/USP15/SFPQ/LY96/NCF1/GRN/CCL5/RIPK2/LILRB1/RNF125/PTPN6/HCK/APOE/CARD8/IRAK3/PTPN2/BIRC3/PARP14/PLCG2/IRF7/VAV1/IRF1/APPL2/HLA-A/NFE2L2/CASP8/SCIMP/OASL/ARG2/YTHDF3/IL4I1/AKIRIN2/WNT5A/PRKCA/DUSP10/S…	67
BP	GO:0043087	regulation of GTPase activity	67/1285	376/18903	2.71e-13	1.26e-11	8.3e-12	RGS1/RGS10/CCL3/CCL4/DOCK8/BIN1/SRGAP2/ARHGAP24/CCL3L1/ARRB2/RASGEF1B/PREX1/PYCARD/FGD2/ARHGAP22/SEMA4D/CCL3L3/MAP4K4/ARHGAP25/TIAM1/CHN2/DOCK10/RCC2/RASGEF1C/ARHGAP12/RHOG/FGD4/RASAL3/CCL5/C9orf72/ARHGAP15/TBC1D22A/ARHGAP27/TBC1D12/CCL4L1/ABR/RASA3/RASGRP3/SIPA1/LIMS1/SNX9/VAV1/ARHGAP9/WNK1/EZH2/SH3BP1/RAPGEF6/SIPA1L2/RABGAP1L/TBC1D4/PICALM/USP6NL/NDEL1/GPR65/S100A10/IQGAP2/WNT5A/CCL2/ARAP1/TBC1…	67
BP	GO:0043254	regulation of protein-containing complex assembly	67/1285	410/18903	1.62e-11	5.7e-10	3.75e-10	SORL1/HSP90AA1/HCLS1/HSPA1A/PLEK/BIN1/LCP1/HSPA1B/COTL1/CLEC7A/CORO1A/TREM2/NAV3/HSPA8/SCIN/PTGER4/P2RY12/FSCN1/RPS3/TLR4/RPL13A/LDLRAD4/TGFB1/PYCARD/GRB2/NCKAP1L/CAPG/PDE4DIP/TNF/SYK/ATM/PAK1/ARPC3/TMSB10/ARPC2/TAL1/CYFIP1/ARPC1B/TMSB4X/FKBP4/SNCA/FNIP2/TLR6/ARHGAP18/PRKCD/HSPA5/PIEZO1/HCK/TFRC/BAIAP2/APOE/CARD8/FMN1/FCHSD2/PIH1D1/PLCG2/SNX9/DDX3X/TMC8/RAC1/CRYAB/CAPZA1/SSH1/BID/BCL2L11/VEGFA/AB…	67
BP	GO:0052548	regulation of endopeptidase activity	67/1285	428/18903	1.12e-10	3.29e-09	2.17e-09	LAPTM5/GPX1/C3/SORL1/HSPD1/BIN1/DNAJB6/RHBDF2/HSPE1/CLEC7A/PMAIP1/NR4A1/SERPINB9/ARRB2/CTSH/LGALS9/LYN/IFI16/LGMN/RPS3/MBP/NLRP3/PLAUR/PRNP/SERPINE1/KLF4/PYCARD/NAIP/TNF/SERPINF1/SYK/PTGS2/SERPINA1/ARL6IP1/SNCA/CASP1/RPS6KA1/RIPK2/SIRT1/RPS6KA3/TNFSF10/CARD8/SPINT2/SIAH2/CST3/APAF1/MAP3K5/BIRC3/MICAL1/MYC/PIH1D1/CFLAR/CASP10/JAK2/GAS6/NLRP1/MALT1/CASP8/DDX3X/AKIRIN2/PICALM/CRYAB/TNFSF14/BID/TNFAI…	67
BP	GO:0007015	actin filament organization	67/1285	454/18903	1.44e-09	3.43e-08	2.26e-08	AIF1/HCLS1/PLEK/BIN1/TPM3/LCP1/COTL1/PHACTR1/CORO1A/SCIN/PTGER4/ELMO1/MARCKS/FSCN1/PREX1/MYO1F/PYCARD/WAS/ABI1/GRB2/NCKAP1L/CAPG/ARHGAP25/CCDC88A/ACTR3/PAK1/ARPC3/TMSB10/WIPF1/ARPC2/ARHGAP12/CYFIP1/ARPC1B/RHOG/TMSB4X/TGFBR1/ARHGAP18/ACTR2/PRKCD/C9orf72/HCK/BAIAP2/SWAP70/FMN1/ARHGEF2/DIAPH2/MICAL1/CXCL12/FCHSD2/JAK2/SNX9/SH3BP1/CORO7/RAC2/PIK3R1/RAC1/GPR65/RHOH/S100A10/IQGAP2/ARAP1/CAPZA1/SSH1/PRO…	67
BP	GO:0048872	homeostasis of number of cells	66/1285	296/18903	4e-18	3.93e-16	2.59e-16	CD74/SKIL/ID2/HCLS1/KLF2/HSPA1A/HSPA1B/GPR183/HMOX1/RPS19/RPS24/CX3CR1/PMAIP1/CORO1A/IKZF1/TNFAIP3/LGALS9/MAFB/LYN/INPP5D/RPS6/SPI1/ZFP36/P2RX7/NCKAP1L/RPS14/DOCK10/JMJD6/TAL1/ALAS1/DNASE2/BTK/RASSF2/SLC11A2/SPNS2/INHBA/LIPA/MERTK/PDE4B/PTPN2/PTBP3/PKNOX1/TNFSF13B/SH2B3/HAMP/JAK2/EZH2/HSPA9/KCNQ1/KRAS/ZFP36L1/POLB/CARD11/ARID4A/TNFSF14/CITED2/CDK6/ADAM17/FOXO3/CSF1/BCL2L11/MEF2C/VEGFA/HIF1A/TSC22…	66
BP	GO:0031349	positive regulation of defense response	65/1285	307/18903	1.14e-16	9.55e-15	6.3e-15	TYROBP/HLA-E/C3/CCL3/HSP90AA1/NFKBIA/HAVCR2/NEAT1/IL18/IL1B/CTSC/FCGR1A/RPS19/ALOX5AP/CLEC7A/TREM2/PTGER4/LYN/IFI16/CEBPA/NLRP3/SPI1/TLR4/MIR142/TLR2/IL6ST/SERPINE1/NINJ1/PYCARD/NFKBIZ/NAIP/TNF/OSM/SYK/PAK1/PTGS2/VAMP8/IL17RA/SFPQ/BTK/SNCA/TLR7/GRN/CASP1/CCL5/RIPK2/HCK/CEBPB/IL16/PLCG2/IRF7/JAK2/PIK3CG/VAV1/GPSM3/NLRP1/LDLR/AKIRIN2/TLR3/CASP4/WNT5A/TLR10/PDCD4/SUCNR1/MEF2C	65
BP	GO:0070997	neuron death	65/1285	368/18903	9.37e-13	3.94e-11	2.6e-11	GPX1/TYROBP/CCL3/C1QA/SORL1/ITGB2/NR4A2/SOD2/HSP90AB1/HMOX1/CX3CR1/CORO1A/MCL1/TREM2/ARRB2/NR4A3/CTSZ/BTG2/LGMN/FOS/TLR4/PRNP/IL6ST/JUN/NAIP/UBB/TNF/SERPINF1/ATM/TNFRSF1B/ITGAM/CLN8/CPEB4/SNCA/TLR6/DDIT4/GRN/HSPA5/CCL5/GRID2/SIRT1/TRPM2/APOE/CEBPB/APAF1/MAP3K5/DDIT3/JAK2/NLRP1/CASP8/FBXW7/KRAS/PICALM/POLB/EGR1/WNT5A/CCL2/NCOA7/FOXO3/BID/CSF1/MAP3K11/BCL2L11/MEF2C/HIF1A	65
BP	GO:0006979	response to oxidative stress	65/1285	434/18903	1.38e-09	3.32e-08	2.19e-08	GPX1/AIF1/KLF2/NR4A2/HSPA1A/SOD2/HSPA1B/HMOX1/PLK3/MCL1/TREM2/KDM6B/TNFAIP3/IPCEF1/NR4A3/STX4/RPS3/PPP1R15B/FOS/SLC8A1/TLR4/PRNP/JUN/UCP2/TNF/SIRPA/IL1A/ZC3H12A/PPIF/PTGS2/SFPQ/BTK/OSER1/SNCA/TLR6/NCF1/PRKCD/GCH1/SIRT1/ALOX5/TRPM2/APOE/ERN1/ERCC1/MAP3K5/JAK2/PTGS1/FOXO1/EZH2/NFE2L2/FBXW7/OXSR1/ETV5/CRYAB/EDN1/MMP2/NCOA7/FOXO3/PNPLA8/NET1/SETX/RHOB/IDH1/HIF1A/ANXA1	65
BP	GO:0002685	regulation of leukocyte migration	64/1285	231/18903	6.33e-23	9.92e-21	6.54e-21	CD74/CSF1R/CCL3/AIF1/DUSP1/CCL4/DOCK8/HMOX1/C3AR1/CX3CR1/CORO1A/TREM2/PTGER4/P2RY12/LGALS9/LYN/LGMN/C5AR1/SPI1/SERPINE1/PTAFR/PYCARD/ABL2/NCKAP1L/ICAM1/CCR1/TNF/CD300A/IL1A/IL6R/PADI2/RHOG/RIN3/P2RX4/STK10/SPNS2/CCL5/SWAP70/ADAM10/CXCL12/LYVE1/WNK1/GPSM3/PLVAP/GAS6/OXSR1/RAC2/PIK3R1/JAM2/RAC1/SLC8B1/EDN1/SPN/RHOH/WNT5A/CCL2/TNFSF14/ADAM17/MPP1/CCL20/NEDD9/CSF1/VEGFA/ANXA1	64
BP	GO:0042113	B cell activation	64/1285	350/18903	2.78e-13	1.28e-11	8.44e-12	CD74/PTPRC/LAPTM5/TYROBP/ZFP36L2/ID2/HSPD1/SAMSN1/GPR183/IRF8/KLF6/TNFAIP3/SKAP2/CDKN1A/XBP1/LYN/CD86/INPP5D/IRS2/SPI1/PELI1/TLR4/LAT2/LYL1/TGFB1/NCKAP1L/SYK/BLNK/ATM/CD300A/HHEX/DOCK10/ST3GAL1/HDAC9/BTK/PRKCD/INHBA/SLC39A10/THEMIS2/PTPN6/PTPRJ/TFRC/SWAP70/ERCC1/ICOSLG/PTPN2/TNFSF13B/PLCG2/TNFRSF13C/EZH2/MALT1/CASP8/IL4I1/AKIRIN2/PIK3R1/CMTM7/NFATC2/ZFP36L1/CARD11/ITFG2/PLCL2/ZBTB1/ADAM17/MEF2C	64
BP	GO:0042326	negative regulation of phosphorylation	64/1285	381/18903	1.38e-11	4.99e-10	3.29e-10	PTPRC/SORL1/RGS2/DUSP1/SAMSN1/IL1B/DNAJA1/GADD45B/LILRB4/ARRB2/TNFAIP3/CDKN1A/CHORDC1/LYN/CEBPA/PPP1R15B/IRS2/SLC8A1/NPM1/PRNP/LDLRAD4/TGFB1/PYCARD/TRIB1/JUN/SEMA4D/SIRPA/PRKAG2/CD300A/HHEX/ZC3H12A/MIDN/SOCS3/GNAQ/SNCA/DDIT4/RASSF2/HNRNPU/LRRK1/PRKCD/C9orf72/INHBA/SIRT1/PTPN6/SMAD7/PTPRJ/MLXIPL/APOE/IRAK3/PTPN2/PIK3IP1/MICAL1/SH2B3/PARP14/DUSP6/NUP62/IPO7/DEPTOR/DUSP10/SOCS1/PDCD4/SPAG9/PIP4K2A/S…	64
BP	GO:0030217	T cell differentiation	63/1285	296/18903	2.59e-16	1.95e-14	1.29e-14	CD74/PTPRC/HLA-DRA/HLA-DRB1/CD83/ZFP36L2/JUNB/IL18/IL1B/GPR183/FCER1G/LILRB4/EGR3/RUNX1/NFKBID/PTGER4/LGALS9/PREX1/MAFB/XBP1/FGL2/CD86/RPS6/NLRP3/SPI1/DOCK2/NFKBIZ/NCKAP1L/SYK/PNP/IL1A/ZC3H12A/IL6R/JMJD6/CHD7/PRDM1/RELB/RIPK2/SMAD7/PTPN2/PKNOX1/VAV1/IRF1/MALT1/HLA-DOA/IL4I1/PIK3R1/ZFP36L1/CARD11/SPN/RHOH/EGR1/DUSP10/ZBTB1/SOCS1/CDK6/ADAM17/FOXO3/HLX/RUNX3/TNFSF9/NRARP/ANXA1	63
BP	GO:0062197	cellular response to chemical stress	63/1285	345/18903	4.57e-13	2.02e-11	1.33e-11	GPX1/AIF1/KLF2/NR4A2/HSPA1A/SOD2/HSPA1B/DNAJA1/HMOX1/MCL1/TREM2/KDM6B/TNFAIP3/NR4A3/STX4/RPS3/NLRP3/FOS/TLR4/PYCARD/JUN/TNF/SIRPA/ATM/ZC3H12A/PPIF/PTGS2/SFPQ/BTK/OSER1/SNCA/TLR6/NCF1/CASP1/PRKCD/RELB/GCH1/SIRT1/ALOX5/TRPM2/ERN1/ARHGEF2/MAP3K5/DDIT3/JAK2/FOXO1/EZH2/NFE2L2/DDX3X/FBXW7/OXSR1/ETV5/ZFP36L1/EDN1/MMP2/NCOA7/FOXO3/PNPLA8/NET1/SETX/RHOB/HIF1A/ANXA1	63
BP	GO:0001818	negative regulation of cytokine production	63/1285	371/18903	1.23e-11	4.5e-10	2.97e-10	PTPRC/REL/LAPTM5/HLA-DRB1/SRGN/CD83/TYROBP/KLF2/HAVCR2/HSP90AB1/CD84/HMOX1/LILRB4/CX3CR1/TREM2/NAV3/ARRB2/TNFAIP3/PTGER4/LGALS9/SLC11A1/VSIG4/INPP5D/NLRP3/NFKB1/TLR4/ZFP36/MIR142/PRNP/TGFB1/KLF4/PYCARD/NCKAP1L/TNF/SIRPA/CYLD/ZC3H12A/ADCY7/HDAC9/IGF1/TMSB4X/BTK/TLR6/RELB/INHBA/ATP2B1/LILRB1/RNF125/PTPN6/SMAD7/MERTK/HOMER3/CARD8/IRAK3/DDIT3/APPL2/EZH2/GAS6/ARG2/CD33/RAC1/PDCD4/ANXA1	63
BP	GO:0045862	positive regulation of proteolysis	63/1285	372/18903	1.39e-11	5.01e-10	3.3e-10	LAPTM5/HSPD1/HSPA1A/IL1B/CTSC/HSPA1B/ZFAND2A/HSPE1/CLEC7A/PLK3/PMAIP1/TREM2/CTSH/LGALS9/LYN/IFI16/LGMN/RPS3/CEBPA/MBP/NLRP3/PYCARD/TRIB1/HERPUD1/TNF/SYK/TNFRSF1B/ZC3H12A/SNCA/GRN/CASP1/RIPK2/PSME4/SIRT1/SMAD7/APOE/TNFSF10/CARD8/APAF1/MAP3K5/CSNK1D/MYC/CFLAR/DAB2/CASP10/JAK2/SNX9/NFE2L2/NLRP1/MALT1/CASP8/DDX3X/RNF144B/FBXW7/TANK/AKIRIN2/PICALM/ARIH1/MDM2/S100A10/BID/BCL2L11/RNF19A	63
BP	GO:0009615	response to virus	63/1285	409/18903	7.93e-10	1.97e-08	1.3e-08	PTPRC/HSP90AA1/CCL4/IL1B/TPT1/ITGAX/DDX21/PMAIP1/HTRA1/IFNGR1/CXCR4/TNFAIP3/LGALS9/IVNS1ABP/FGL2/IFI16/NLRP3/NFKB1/TLR2/PYCARD/POU2F2/RPS15A/SAMHD1/TNF/NPC2/ODC1/ZC3H12A/TRIM38/USP15/RNASE6/VAMP8/IL17RA/TLR7/DDIT4/ZC3HAV1/CASP1/IFNGR2/CCL5/LILRB1/RNF125/MX2/CARD8/MLKL/IRAK3/BIRC3/CXCL12/IRF5/IRF7/JAK2/TRIM22/IRF1/LYST/NLRP1/OASL/DDX3X/TANK/DDX60L/UNC93B1/TLR3/CDK6/IFIT2/ISG20/HIF1A	63
BP	GO:0002449	lymphocyte mediated immunity	62/1285	367/18903	2.25e-11	7.77e-10	5.12e-10	CD74/PTPRC/HLA-DRA/HLA-DRB1/C1QB/HLA-E/C3/HLA-DPA1/C1QA/C1QC/HSPD1/HAVCR2/HLA-DPB1/IL18/IL1B/CTSC/HLA-DQB1/FCER1G/FCGR1A/HLA-B/FCGR3A/LILRB4/HLA-DMA/CORO1A/TREM2/SERPINB9/HLA-DQA1/ARRB2/CTSH/LGALS9/HLA-DMB/INPP5D/NLRP3/P2RX7/TGFB1/WAS/HLA-DRB5/CD55/NCKAP1L/ICAM1/TNF/TNFRSF1B/STX7/BTK/PRKCD/LILRB1/PTPN6/SMAD7/TFRC/SWAP70/ARID5A/ERCC1/C2/IRF7/VAV1/HLA-A/LYST/MALT1/HLA-DOA/IL4I1/ZBTB1/TUBB4B	62
BP	GO:1901653	cellular response to peptide	62/1285	373/18903	4.53e-11	1.44e-09	9.52e-10	SORL1/KLF2/NR4A2/PTPRE/IL1B/TREM2/NR4A1/NR4A3/XBP1/LYN/LGMN/NFKB1/FOS/IRS2/TLR4/PRNP/ADRB2/PDE3B/LPIN2/RPL23/GRB2/ICAM1/UCP2/TNF/SYAP1/SOCS3/CYFIP1/HDAC9/IGF1/TLR6/INSIG1/PRKCD/RIPK2/INHBA/ATP2B1/SIRT1/SNX5/RAB31/BAIAP2/ARHGEF2/KLF3/PTPN2/CFLAR/JAK2/GNAI2/FOXO1/APPL2/SLC25A33/NFE2L2/PIK3R1/TBC1D4/ZFP36L1/NDEL1/EDN1/CASP4/MDM2/CACNA1A/SOCS1/FOXO3/PDK4/BCL2L11/PIP4K2A	62
BP	GO:0022411	cellular component disassembly	62/1285	483/18903	9.76e-07	1.3e-05	8.56e-06	C1QB/C3/C1QA/C1QC/CTSS/PLEK/LCP1/PLK3/CX3CR1/TREM2/NAV3/HSPA8/SCIN/FSCN1/ADRB2/TGFB1/PLIN2/GABARAPL1/RPL23/MAP4K4/CAPG/TNF/ETF1/CHMP1B/ITGAM/HMGA1/HK2/DNASE2/USP36/VAMP8/PDPN/TGFBR1/DDIT4/DEDD2/NCKAP5/SWAP70/ARHGEF2/ABCE1/ADAM10/CST3/IRAK3/APAF1/GSPT1/MICAL1/MYC/SH3BP1/GAK/MAP1LC3B/FBXW7/UVRAG/PIK3R1/NDEL1/MMP2/PRKCA/CAPZA1/SQSTM1/MMP19/FRAT1/NEDD9/SETX/VMP1/HIF1A	62
BP	GO:0001667	ameboidal-type cell migration	62/1285	492/18903	1.82e-06	2.29e-05	1.51e-05	GPX1/HMOX1/SRGAP2/DNAJA4/EGR3/CORO1A/NR4A1/CTSH/P2RY12/LGMN/IRS2/SLC8A1/RIN2/PDGFB/GNA13/TGFB1/KLF4/JUN/SEMA4D/MAP4K4/MAP2K3/TNF/SERPINF1/VASH1/ZC3H12A/RCC2/PTGS2/ARHGAP4/HDAC9/TMSB4X/P2RX4/TGFBR1/MIR29A/GRN/GLUL/SIRT1/APOE/ZFAND5/LPXN/PLCG2/PIK3CG/PLK2/APPL2/SH3BP1/SMURF2/NFE2L2/FBXW7/YTHDF3/RAC1/EDN1/WNT5A/PRKCA/HBEGF/DUSP10/PROX1/ADAM17/ZEB2/RHOB/MEF2C/VEGFA/HIF1A/ANXA1	62
BP	GO:0031667	response to nutrient levels	61/1285	474/18903	1.1e-06	1.44e-05	9.49e-06	GPX1/SPP1/SORL1/SOD2/CYBB/HMOX1/CD68/PMAIP1/HSPA8/CDKN1A/KLF10/XBP1/IFI16/FOS/SLC8A1/FOLR2/ZFP36/ADRB2/PLIN2/GABARAPL1/SLC7A5/UCP2/TNF/PRKAG2/CHSY1/IL1A/SIK1/ACSL1/ZC3H12A/PTGS2/CPEB4/ATF3/HSPA5/GLUL/UPP1/ATP2B1/SIRT1/TFRC/APOE/ERCC1/MIOS/APAF1/MAP3K5/DDIT3/HAMP/GNAI2/FOXO1/APPL2/GAS6/NFE2L2/MAP1LC3B/LDLR/DSC2/MFSD2A/ITFG2/PIM1/MTHFR/PROX1/FOXO3/SLC16A1/PDK4	61
BP	GO:0042098	T cell proliferation	60/1285	212/18903	4.36e-22	6.32e-20	4.17e-20	PTPRC/HLA-DRB1/HLA-E/HLA-DPA1/AIF1/HAVCR2/DOCK8/HLA-DPB1/IL18/IL1B/LILRB4/CORO1A/LGALS9/SLC11A1/HLA-DMB/VSIG4/CD86/RPS3/RPS6/PELI1/DOCK2/PRNP/IL6ST/P2RX7/PYCARD/CD55/NCKAP1L/SYK/PNP/IL1A/TNFRSF1B/IGF1/RASAL3/CCL5/RIPK2/LILRB1/CCDC88B/PTPN6/TFRC/CEBPB/ICOSLG/TNFSF13B/TMIGD2/JAK2/PIK3CG/IRF1/TNFRSF13C/HLA-A/MALT1/EBI3/ARG2/PPP3CA/IL4I1/RAC2/CARD11/SPN/TNFSF14/BID/TNFSF9/ANXA1	60
BP	GO:0071219	cellular response to molecule of bacterial origin	60/1285	234/18903	9.89e-20	1.12e-17	7.41e-18	CCL3/NFKBIA/HAVCR2/IL18/IL1B/CD68/CX3CR1/TREM2/IRF8/TNFAIP3/LY86/XBP1/LITAF/LYN/CD86/NLRP3/NFKB1/SPI1/TLR4/ZFP36/TLR2/CD14/SERPINE1/PTAFR/TGFB1/PYCARD/TRIB1/CD55/SLC7A5/IRAK2/MAP2K3/TNF/SIRPA/IL1A/TNFRSF1B/ZC3H12A/TLR1/LY96/TLR6/CASP1/CCL5/RIPK2/LILRB1/HCK/CEBPB/ARID5A/CARD8/PDE4B/PLCG2/HAMP/JAK2/NFKBIB/MALT1/SCIMP/WNT5A/CCL2/PRKCA/PDCD4/MEF2C/ABCA1	60
BP	GO:0006909	phagocytosis	60/1285	314/18903	2.16e-13	1.03e-11	6.76e-12	PTPRC/TYROBP/C3/AIF1/ITGB2/IL1B/FCER1G/FCGR1A/CLEC7A/PLD4/CORO1A/TREM2/IRF8/ELMO1/SLC11A1/LYN/BIN2/MSR1/TLR4/DOCK2/TLR2/CD14/P2RX7/PYCARD/NCKAP1L/ARHGAP25/TNF/SIRPA/SYK/CD300A/PAK1/JMJD6/ARHGAP12/ITGAM/RHOG/NCF4/BTK/PRKCD/NCF2/PTPRJ/HCK/RAB31/MERTK/CDC42SE1/C2/PLCG2/VAV1/APPL2/SH3BP1/GAS6/LYST/ITGAL/LDLR/RAC2/RAC1/CDC42SE2/RHOH/CCL2/ABCA1/ANXA1	60
BP	GO:0032970	regulation of actin filament-based process	60/1285	406/18903	9.9e-09	1.99e-07	1.31e-07	CSF1R/HCLS1/PLEK/BIN1/COTL1/CORO1A/SCIN/PTGER4/FSCN1/PYCARD/WAS/ABL2/GRB2/NCKAP1L/CAPG/CCDC88A/IL1A/PAK1/ARPC3/TMSB10/ARPC2/AKAP13/CYFIP1/ARPC1B/RHOG/TMSB4X/PDPN/TGFBR1/ARHGAP18/PRKCD/C9orf72/ABI3/TRPM2/HCK/BAIAP2/SWAP70/FMN1/PDE4B/CXCL12/FCHSD2/SNX9/SH3BP1/RAC2/PIK3R1/RAC1/DSC2/EDN1/KCNJ2/GPR65/RHOH/S100A10/IQGAP2/ARAP1/CAPZA1/ABRACL/SSH1/PROX1/NEDD9/RHOB/GMFG	60
BP	GO:0051051	negative regulation of transport	60/1285	479/18903	3.23e-06	3.82e-05	2.52e-05	CD74/RGS2/IL1B/BIN1/CD84/HMOX1/BAG3/RHBDF2/APOC1/CORO1A/LGALS9/FRMD4A/NFKB1/IRS2/SPI1/TLR2/CTTNBP2NL/NCKAP1L/SDCBP/UCP2/TNF/OSM/SIRPA/CD300A/OAZ1/TNFRSF1B/PPIF/MIDN/PTGS2/CYFIP1/RAB11FIP1/VAMP8/SLC43A2/RIN3/SNCA/INSIG1/UBAC2/INHBA/LILRB1/APOE/PIM3/HAMP/GNAI2/FOXO1/WNK1/APPL2/SLC30A1/APOC2/CD33/OXSR1/PPP3CA/TBC1D4/PICALM/RAC1/CRYAB/GSTM2/EDN1/UBE2J1/KLF7/ANXA1	60
BP	GO:0002703	regulation of leukocyte mediated immunity	59/1285	241/18903	2.24e-18	2.24e-16	1.48e-16	PTPRC/HLA-DRA/HLA-DRB1/TYROBP/HLA-E/C3/HSPD1/ITGB2/HAVCR2/IL18/IL1B/CD84/HMOX1/FCGR1A/HLA-B/LILRB4/CLEC7A/CX3CR1/DDX21/TREM2/SERPINB9/ARRB2/LGALS9/STX4/LYN/NLRP3/SPI1/TLR4/PTAFR/P2RX7/TGFB1/WAS/CD55/NCKAP1L/ICAM1/TNF/SYK/CD300A/TNFRSF1B/ITGAM/STX7/VAMP8/BTK/LILRB1/PTPN6/SMAD7/TFRC/ARID5A/STXBP2/PLCG2/VAV1/HLA-A/MALT1/SCIMP/IL4I1/RAC2/TLR3/GAB2/ZBTB1	59
BP	GO:0034612	response to tumor necrosis factor	59/1285	254/18903	3.23e-17	2.84e-15	1.87e-15	LAPTM5/ZFP36L2/CCL3/KLF2/CCL4/NFKBIA/HSPA1A/HSPA1B/CXCL16/CCL3L1/TNFAIP3/RPS3/CEBPA/MBP/NFKB1/FOS/ZFP36/MIR142/CD14/PYCARD/CCL3L3/NAIP/TNF/SYK/CYLD/TNFRSF1B/GBP2/ZC3H12A/PTGS2/TMSB4X/CASP1/CCL5/GCH1/SIRT1/CARD8/ARHGEF2/CCL4L1/ADAM10/MAP3K5/PTPN2/BIRC3/TNFSF13B/NFATC1/LIMS1/HAMP/JAK2/TNFRSF13C/PLVAP/GAS6/NFE2L2/CASP8/TANK/ZFP36L1/EDN1/CASP4/CCL2/ADAM17/FOXO3/CCL20	59
BP	GO:0007249	I-kappaB kinase/NF-kappaB signaling	59/1285	288/18903	1.42e-14	8.3e-13	5.47e-13	CD74/REL/HLA-DRB1/NFKBIA/IL1B/HMOX1/LILRB4/CLEC7A/CX3CR1/DDX21/TREM2/TNFAIP3/LGALS9/LITAF/PELI1/TLR4/TLR2/ATP2C1/PYCARD/SLC20A1/IRAK2/TNF/SIRPA/IL1A/ZC3H12A/AKAP13/TRIM38/TAB2/BTK/TLR7/TLR6/CASP1/RELB/RIPK2/SIRT1/TFRC/TNFSF10/CARD8/TMEM106A/TNFRSF10B/BIRC3/CFLAR/PLCG2/CASP10/TRIM22/PLK2/NFKBIB/MALT1/CASP8/NUP62/TANK/TLR3/EDN1/CARD11/S100A4/RHOH/WNT5A/ALPK1/SQSTM1	59
BP	GO:0097193	intrinsic apoptotic signaling pathway	59/1285	298/18903	6.87e-14	3.46e-12	2.28e-12	CD74/GPX1/SKIL/HSPA1A/SOD2/TPT1/DNAJA1/HMOX1/PPP1R15A/PMAIP1/MCL1/TREM2/CDKN1A/BCL2A1/IVNS1ABP/XBP1/IFI16/RPS3/PLAUR/PYCARD/HERPUD1/RPL11/UBB/TNF/RPL26/DDX5/ATM/CYLD/TNFRSF1B/PPIF/PTGS2/SFPQ/FNIP2/DDIT4/PRKCD/SIRT1/CEBPB/ERN1/ARHGEF2/TNFRSF10B/APAF1/MAP3K5/PTPN2/CXCL12/MYC/DDIT3/JAK2/NFE2L2/DDX3X/FBXW7/FHIT/PIK3R1/POLB/CASP4/MDM2/MLLT11/BID/BCL2L11/HIF1A	59
BP	GO:0007162	negative regulation of cell adhesion	59/1285	308/18903	3.07e-13	1.4e-11	9.2e-12	CD74/PTPRC/LAPTM5/HLA-DRB1/DUSP1/HAVCR2/LILRB4/SOCS6/RUNX1/LGALS9/VSIG4/FGL2/CD86/MBP/SPI1/PELI1/PRNP/SERPINE1/TGFB1/KLF4/PDE3B/SEMA4D/MAP4K4/NCKAP1L/CD300A/ZC3H12A/RCC2/FXYD5/PRKCD/LILRB1/PTPN6/SMAD7/CEBPB/SWAP70/SPINT2/IL1RN/ADAM10/PTPN2/SIPA1/CXCL12/GTPBP4/SH2B3/LPXN/JAK2/IRF1/WNK1/ARG2/IL4I1/PIK3R1/MMP2/SPN/AKNA/SOCS1/HLX/GCNT2/RUNX3/VEGFA/NRARP/ANXA1	59
BP	GO:1901214	regulation of neuron death	59/1285	325/18903	3.28e-12	1.28e-10	8.42e-11	TYROBP/CCL3/C1QA/SORL1/ITGB2/NR4A2/SOD2/HSP90AB1/HMOX1/CX3CR1/CORO1A/MCL1/TREM2/ARRB2/NR4A3/CTSZ/BTG2/LGMN/FOS/TLR4/PRNP/IL6ST/JUN/NAIP/UBB/TNF/SERPINF1/ATM/TNFRSF1B/ITGAM/CLN8/CPEB4/SNCA/TLR6/DDIT4/GRN/CCL5/GRID2/SIRT1/TRPM2/APOE/CEBPB/MAP3K5/DDIT3/JAK2/CASP8/FBXW7/KRAS/PICALM/EGR1/WNT5A/CCL2/NCOA7/FOXO3/CSF1/MAP3K11/BCL2L11/MEF2C/HIF1A	59
BP	GO:0071496	cellular response to external stimulus	59/1285	328/18903	4.89e-12	1.89e-10	1.24e-10	PTPRC/AIF1/NR4A2/IL1B/HMOX1/CD68/BAG3/PMAIP1/HSPA8/PTGER4/CDKN1A/KLF10/XBP1/LYN/IFI16/NFKB1/FOS/TLR4/FOLR2/P2RX7/PLIN2/GABARAPL1/SLC7A5/UCP2/PRKAG2/SIK1/ZC3H12A/PTGS2/MAP3K2/CPEB4/TLR7/ATF3/CASP1/HSPA5/GLUL/UPP1/ATP2B1/SIRT1/PIEZO1/MIOS/TNFRSF10B/TLR5/MAP3K5/SIPA1/IRF1/FOXO1/GAS6/NFE2L2/CASP8/MAP1LC3B/DSC2/TLR3/MFSD2A/KCNJ2/ITFG2/TNFSF14/PIM1/FOXO3/PDK4	59
BP	GO:0031331	positive regulation of cellular catabolic process	59/1285	429/18903	1.75e-07	2.76e-06	1.82e-06	LAPTM5/PABPC1/ZFP36L2/HSPA1A/IL1B/HSPA1B/HMOX1/ZFAND2A/BAG3/PLK3/BTG2/SPTLC2/CEBPA/IRS2/ZFP36/ADRB2/P2RX7/TRIB1/HERPUD1/TNF/ATM/TNFRSF1B/ZC3H12A/DAGLB/TRIM38/IGF1/SNCA/HNRNPU/ZC3HAV1/PRKCD/RIPK2/C9orf72/SIRT1/SMAD7/MLXIPL/APOE/CSNK1D/DCP2/DAB2/SNX9/TRIM22/ATF6/PLK2/FOXO1/NFE2L2/RNF144B/FBXW7/YTHDF3/APOC2/UVRAG/ARIH1/ZFP36L1/MDM2/FOXO3/KCNQ1OT1/BCL2L11/PIP4K2A/HIF1A/RNF19A	59
BP	GO:0051960	regulation of nervous system development	59/1285	456/18903	1.38e-06	1.78e-05	1.17e-05	BHLHE41/SKIL/SPP1/SORL1/ID2/IL1B/BIN1/CTSC/ITGAX/CX3CR1/TREM2/CXCR4/TYMP/LYN/MBP/MIR142/TLR2/IL6ST/TGFB1/SEMA4D/SLC7A5/YWHAH/EGR2/IFRD1/TNF/SERPINF1/TIAM1/TNFRSF1B/ARHGAP4/CYFIP1/CHD7/SYNDIG1/ACTR2/GRID2/IL1RAP/BAIAP2/BHLHE40/CXCL12/APPL2/EZH2/SKI/DIP2B/KRAS/LDLR/PPP3CA/JAM2/NDEL1/PLAG1/DNAJB11/S100A10/WNT5A/GOLGA4/DUSP10/PRKCH/PROX1/RHEB/HES6/VEGFA/HIF1A	59
BP	GO:0097529	myeloid leukocyte migration	58/1285	242/18903	1.27e-17	1.19e-15	7.83e-16	CD74/CSF1R/CCL3/AIF1/DUSP1/CCL4/ITGB2/CSF3R/IL1B/FCER1G/RPS19/C3AR1/CX3CR1/CCL3L1/TREM2/PTGER4/P2RY12/PREX1/B4GALT1/LYN/LGMN/C5AR1/SPI1/PDGFB/SERPINE1/CCL3L3/NCKAP1L/CCR1/SIRPA/SYK/CD300A/IL1A/IL6R/RHOG/IL17RA/RIN3/P2RX4/CCL5/SWAP70/CCL4L1/PDE4B/CXCL12/PIK3CG/VAV1/RAC2/PIK3R1/TREM1/RAC1/EDN1/MMP2/RHOH/CCL2/MPP1/CCL20/CSF1/FLT1/VEGFA/ANXA1	58
BP	GO:0051056	regulation of small GTPase mediated signal transduction	58/1285	305/18903	6.74e-13	2.92e-11	1.92e-11	DOCK8/SRGAP2/TAGAP/ARHGAP24/SPATA13/PREX1/LPAR6/DOCK2/GNA13/FGD2/ARHGAP22/ABL2/MCF2L/MAP4K4/CYTH4/ARHGAP25/ARHGAP21/MYO9B/TIAM1/CHN2/ARHGAP12/AKAP13/ARHGAP4/IGF1/CYTH1/FGD4/SRGAP3/ARHGAP18/DEF6/RASAL3/ARHGAP15/ARHGAP30/APOE/CDC42SE1/ARHGAP27/SWAP70/ARHGEF2/ABR/RASA3/ARHGAP26/SIPA1/PIK3CG/VAV1/ARHGAP9/ARHGEF1/SH3BP1/NUP62/KRAS/SIPA1L2/RAC1/CDC42SE2/GPR65/ARAP1/SQSTM1/CSF1/NET1/SPRY2/ABCA1	58
BP	GO:0002440	production of molecular mediator of immune response	58/1285	333/18903	2.86e-11	9.49e-10	6.25e-10	CD74/PTPRC/LAPTM5/HLA-DRA/HLA-DRB1/HLA-E/HLA-DPA1/HSPD1/HLA-DPB1/IL18/IL1B/HLA-DQB1/HMOX1/LILRB4/HLA-DMA/CLEC7A/DDX21/HLA-DQA1/NR4A3/STX4/HLA-DMB/XBP1/LITAF/CD86/NLRP3/TLR4/P2RX7/TGFB1/PYCARD/HLA-DRB5/CD55/SLC7A5/SAMHD1/TNF/SYK/TNFRSF1B/BTK/TLR7/RIPK2/LILRB1/SIRT1/SMAD7/TFRC/SWAP70/ARID5A/ERCC1/IRAK3/TMIGD2/PLCG2/HLA-A/MALT1/HLA-DOA/SCIMP/TREM1/POLB/TLR3/UBE2J1/WNT5A	58
BP	GO:0001933	negative regulation of protein phosphorylation	58/1285	338/18903	5.29e-11	1.65e-09	1.09e-09	PTPRC/SORL1/RGS2/DUSP1/SAMSN1/IL1B/DNAJA1/GADD45B/LILRB4/ARRB2/TNFAIP3/CDKN1A/CHORDC1/LYN/CEBPA/PPP1R15B/SLC8A1/NPM1/PRNP/LDLRAD4/TGFB1/PYCARD/TRIB1/JUN/SEMA4D/SIRPA/PRKAG2/CD300A/HHEX/ZC3H12A/SOCS3/GNAQ/SNCA/DDIT4/RASSF2/LRRK1/PRKCD/C9orf72/SIRT1/PTPN6/SMAD7/PTPRJ/MLXIPL/APOE/IRAK3/PTPN2/MICAL1/SH2B3/PARP14/DUSP6/NUP62/IPO7/DEPTOR/DUSP10/SOCS1/PDCD4/SPAG9/SPRY2	58
BP	GO:0070371	ERK1 and ERK2 cascade	58/1285	340/18903	6.74e-11	2.05e-09	1.35e-09	CD74/PTPRC/HLA-DRB1/ZFP36L2/CSF1R/CCL3/CCL4/HAVCR2/IL1B/GPR183/CCL3L1/TREM2/ARRB2/PTGER4/CTSH/LGALS9/LYN/C5AR1/TLR4/PDGFB/TGFB1/PYCARD/JUN/CCL3L3/ICAM1/CCR1/TNF/SIRPA/SYK/IL1A/IGF1/ATF3/CCL5/RIPK2/INHBA/PTPN6/RANBP9/APOE/CCL4L1/PTPN2/MYC/CFLAR/DUSP4/DAB2/DUSP6/GNAI2/GAS6/SCIMP/FBXW7/ZFP36L1/EDN1/CCL2/PRKCA/DUSP10/CCL20/DUSP5/GCNT2/SPRY2	58
BP	GO:1902903	regulation of supramolecular fiber organization	58/1285	384/18903	7.81e-09	1.59e-07	1.05e-07	GPX1/HCLS1/HSPA1A/PLEK/BIN1/HSPA1B/COTL1/CORO1A/TREM2/NAV3/HSPA8/SCIN/PTGER4/RPS3/PYCARD/WAS/GRB2/NCKAP1L/CAPG/PDE4DIP/CCDC88A/PAK1/ARPC3/TMSB10/ARPC2/AKAP13/CYFIP1/ARPC1B/TMSB4X/FKBP4/SNCA/TGFBR1/ARHGAP18/PRKCD/C9orf72/HCK/BAIAP2/APOE/SWAP70/FMN1/ARHGEF2/CXCL12/FCHSD2/SNX9/SH3BP1/LDLR/PIK3R1/RAC1/CRYAB/EDN1/GPR65/S100A10/ARAP1/CAPZA1/SSH1/COLGALT1/PROX1/GMFG	58
BP	GO:0016032	viral process	58/1285	421/18903	2.09e-07	3.24e-06	2.13e-06	CD74/HLA-DRB1/PABPC1/CSF1R/CCL3/CTSB/CCL4/HSPA1A/HSP90AB1/HSPA1B/ST6GAL1/EEF1A1/MGAT4A/CXCR4/HSPA8/SELPLG/LGALS9/IFI16/CD86/CH25H/ZFP36/JUN/CD55/CHD1/SLC1A5/ICAM1/TNF/RPSA/ZC3H12A/CHMP1B/ST3GAL1/TRIM38/VAMP8/VPS37B/ZC3HAV1/CCL5/TFRC/MGAT1/APOE/ITGA5/GTF2B/IRF7/TRIM22/GAS6/EIF3F/OASL/DDX3X/ST6GALNAC3/LDLR/UVRAG/USP6NL/RAB1A/RNASEK/CCL2/SLC3A2/PROX1/KPNA2/ISG20	58
BP	GO:0071222	cellular response to lipopolysaccharide	57/1285	222/18903	7.73e-19	8e-17	5.27e-17	CCL3/NFKBIA/HAVCR2/IL18/IL1B/CD68/CX3CR1/IRF8/TNFAIP3/LY86/XBP1/LITAF/LYN/CD86/NLRP3/NFKB1/SPI1/TLR4/ZFP36/TLR2/CD14/SERPINE1/PTAFR/TGFB1/PYCARD/TRIB1/CD55/SLC7A5/IRAK2/MAP2K3/TNF/SIRPA/IL1A/TNFRSF1B/ZC3H12A/LY96/CASP1/CCL5/RIPK2/LILRB1/HCK/CEBPB/ARID5A/CARD8/PDE4B/PLCG2/HAMP/JAK2/NFKBIB/MALT1/SCIMP/WNT5A/CCL2/PRKCA/PDCD4/MEF2C/ABCA1	57
BP	GO:0018108	peptidyl-tyrosine phosphorylation	57/1285	380/18903	1.35e-08	2.62e-07	1.72e-07	CD74/PTPRC/CSF1R/HCLS1/SAMSN1/ITGB2/IL18/FCGR1A/LILRB4/TREM2/ARRB2/CLK1/LYN/PDGFB/PRNP/IL6ST/TGFB1/CHKA/ABL2/SEMA4D/ABI1/MAP2K3/TNF/OSM/SYK/CD300A/EHD4/IL6R/SOCS3/IGF1/RAP2B/BTK/LRRK1/NCF1/PRKCD/CCL5/RIPK2/PTPN6/PTPRJ/HCK/MERTK/ARHGEF2/ITGA5/PTPN2/SH2B3/PARP14/PLCG2/JAK2/GAS6/FBXW7/MATK/HBEGF/SOCS1/ADAM17/NEDD9/FLT1/VEGFA	57
BP	GO:0018212	peptidyl-tyrosine modification	57/1285	382/18903	1.64e-08	3.14e-07	2.07e-07	CD74/PTPRC/CSF1R/HCLS1/SAMSN1/ITGB2/IL18/FCGR1A/LILRB4/TREM2/ARRB2/CLK1/LYN/PDGFB/PRNP/IL6ST/TGFB1/CHKA/ABL2/SEMA4D/ABI1/MAP2K3/TNF/OSM/SYK/CD300A/EHD4/IL6R/SOCS3/IGF1/RAP2B/BTK/LRRK1/NCF1/PRKCD/CCL5/RIPK2/PTPN6/PTPRJ/HCK/MERTK/ARHGEF2/ITGA5/PTPN2/SH2B3/PARP14/PLCG2/JAK2/GAS6/FBXW7/MATK/HBEGF/SOCS1/ADAM17/NEDD9/FLT1/VEGFA	57
BP	GO:1903829	positive regulation of protein localization	57/1285	451/18903	4.31e-06	4.95e-05	3.26e-05	HLA-DRB1/TYROBP/SORL1/HSP90AA1/HCLS1/ITGB2/IL1B/HSP90AB1/BAG3/PLK3/TREM2/SERP1/STX4/FRMD4A/IRS2/TLR4/NPM1/TLR2/PRNP/ATP2C1/P2RX7/TGFB1/TCP1/TNF/CCDC88A/IL1A/OAZ1/UBE2D3/ZC3H12A/PTGS2/ITGAM/RHOG/USP36/IGF1/PRKCD/EPB41/GLUL/CACNB4/TRPM2/TFRC/EPB41L2/CCT4/JAK2/GNL3/GAS6/NUP62/FBXW7/CD33/RAC2/PIK3R1/WNT5A/ABCG1/SQSTM1/PRKCH/NEDD9/HSPA1L/HIF1A	57
BP	GO:0023061	signal release	57/1285	470/18903	1.49e-05	0.00015035	9.91e-05	HLA-DRB1/SPP1/IL1B/ADORA3/NR4A1/SERP1/STX4/LYN/IRS2/P2RX7/UCP2/TNF/OSM/SNAP23/SYK/IL1A/MIDN/PTGS2/ABCC4/RAB11FIP1/VAMP8/CHD7/P2RX4/BTK/SNCA/STX11/CCL5/GLUL/INHBA/LILRB1/CACNB4/ALOX5/BLOC1S6/TRPM2/PIM3/STXBP2/IL1RN/CXCL12/DAB2/JAK2/FOXO1/SLC30A1/ICA1/KCNQ1/PPP3CA/PLA2G4A/SYT6/SLC8B1/EDN1/RAB1A/SLC16A1/KLF7/SUCNR1/MEF2C/HIF1A/ABCA1/ANXA1	57
BP	GO:0030003	cellular cation homeostasis	57/1285	499/18903	8.16e-05	0.000643933	0.000424371	PTPRC/FTL/CCL3/TPT1/HMOX1/SLC4A7/CORO1A/SLC11A1/LYN/SLC8A1/ATP1B1/PRNP/ATP2C1/P2RX7/ATP1A1/HERPUD1/ATP6V1B2/CCR1/IL1A/CHD7/SLC9A9/SNCA/SLC11A2/GRN/CCL5/ATP6V0A1/SLC39A10/ATP2B1/ATP13A3/PTPN6/TRPM2/TFRC/APOE/RYR1/RASA3/CXCL12/MYC/KCNMA1/DDIT3/PLCG2/HAMP/FTH1/SLC30A1/ATP6V1F/SLC8B1/GSTM2/EDN1/KCNJ2/RNASEK/WNT5A/ITPR2/TTC7A/MAFG/SLC31A2/MT1X/ATP6V0B/HIF1A	57
BP	GO:0002819	regulation of adaptive immune response	56/1285	198/18903	1.1e-20	1.36e-18	8.98e-19	PTPRC/HLA-DRA/HLA-DRB1/HLA-E/C3/HSPD1/SAMSN1/HAVCR2/JUNB/IL18/IL1B/FCGR1A/HLA-B/LILRB4/CLEC7A/TREM2/NFKBID/TNFAIP3/SLC11A1/NLRP3/IL6ST/P2RX7/TGFB1/PYCARD/WAS/NFKBIZ/CD55/NCKAP1L/TNF/TNFRSF1B/ZC3H12A/ADCY7/STX7/BTK/RIPK2/LILRB1/SIRT1/PTPN6/SMAD7/TFRC/ARID5A/TNFSF13B/IRF7/JAK2/IRF1/HLA-A/CD48/MALT1/IL4I1/AKIRIN2/PLA2G4A/DUSP10/ZBTB1/HLX/MEF2C/ANXA1	56
BP	GO:0071674	mononuclear cell migration	56/1285	206/18903	8.65e-20	1e-17	6.61e-18	CSF1R/CCL3/AIF1/DUSP1/CCL4/DOCK8/GPR183/RPS19/C3AR1/CX3CR1/CXCL16/CORO1A/CCL3L1/CXCR4/LGALS9/LYN/LGMN/C5AR1/SPI1/CH25H/PDGFB/SERPINE1/PYCARD/ABL2/CCL3L3/ICAM1/CCR1/TNF/SIRPA/IL6R/PADI2/STK10/SPNS2/CCL5/ALOX5/TRPM2/CCL4L1/ADAM10/CXCL12/PIK3CG/WNK1/GAS6/ITGAL/OXSR1/JAM2/SLC8B1/SPN/WNT5A/CCL2/TNFSF14/ADAM17/CCL20/NEDD9/CSF1/FLT1/ANXA1	56
BP	GO:0002573	myeloid leukocyte differentiation	56/1285	218/18903	1.53e-18	1.56e-16	1.03e-16	CD74/HLA-DRB1/TYROBP/CSF1R/CCL3/C1QC/ID2/HCLS1/JUNB/GPR183/LILRB4/EVI2B/RUNX1/TREM2/KLF10/MAFB/LYN/IFI16/CEBPA/INPP5D/FOS/SPI1/TLR4/TLR2/TGFB1/TRIB1/JUN/CCR1/TNF/TAL1/RASSF2/LRRK1/RELB/INHBA/LILRB1/SIRT1/TFRC/CEBPB/PTPN2/MYC/IRF7/SNX10/CASP8/FBXW7/PPP3CA/PIK3R1/ZFP36L1/TLR3/GAB2/PRKCA/CITED2/SOCS1/CDK6/NEDD9/CSF1/VEGFA	56
BP	GO:0002768	immune response-regulating cell surface receptor signaling pathway	56/1285	341/18903	6.32e-10	1.61e-08	1.06e-08	PTPRC/LAPTM5/HLA-DRB1/TYROBP/HLA-DPB1/HLA-DQB1/FCER1G/FCGR1A/FCGR3A/LILRB4/ELF1/C3AR1/CLEC7A/NFKBID/NR4A3/LYN/RPS3/C5AR1/INPP5D/FPR1/LAT2/PRNP/KLHL6/NFKBIZ/NCKAP1L/SYK/BLNK/CD300A/PAK1/ZC3H12A/LCP2/BTK/PRKCD/RIPK2/SLC39A10/LILRB1/CACNB4/THEMIS2/PTPN6/PTPRJ/HCK/ICOSLG/PDE4B/PTPN2/LPXN/PLCG2/VAV1/WNK1/APPL2/HLA-A/MALT1/NFATC2/CARD11/PLCL2/PRKCH/MEF2C	56
BP	GO:0051235	maintenance of location	56/1285	342/18903	7.07e-10	1.8e-08	1.18e-08	PTPRC/FTL/SRGN/C3/CCL3/SORL1/NFKBIA/IL1B/CORO1A/TREM2/SCIN/LYN/MSR1/NFKB1/SLC8A1/P2RX7/PLIN2/GAA/ARHGAP21/TNF/CCDC88A/SOAT1/NFKBIE/ZC3H12A/TMSB10/HK2/TMSB4X/CHD7/SNCA/HNRNPU/INSIG1/HSPA5/SIRT1/PTPN6/TRPM2/OSBPL11/APOE/RYR1/RASA3/PTPN2/DDIT3/NRIP1/PLCG2/FTH1/NFKBIB/FBXW7/UVRAG/HEXA/SLC8B1/RNF213/GSTM2/ITPR2/ABCG1/SQLE/ABCA1/ANXA1	56
BP	GO:0050673	epithelial cell proliferation	56/1285	481/18903	5.6e-05	0.000478092	0.000315077	GPX1/ID2/NEAT1/STK4/HMOX1/EGR3/HTRA1/NR4A1/TNFAIP3/NR4A3/B4GALT1/XBP1/C5AR1/IRS2/ZFP36/PDGFB/TGFB1/JUN/HMGN1/TNF/SERPINF1/VASH1/IGF1/BTK/TGFBR1/MIR29A/GRN/RPS6KA1/GLUL/LIPA/SIRT1/ALOX5/APOE/CEBPB/ERN1/CXCL12/MYC/CFLAR/DAB2/FBXW7/ZFP36L1/WNT5A/CCL2/PRKCA/DUSP10/PROX1/CDK6/ADAM17/BID/FLT1/HLX/RUNX3/MEF2C/VEGFA/HIF1A/NRARP	56
BP	GO:0043547	positive regulation of GTPase activity	55/1285	283/18903	1.07e-12	4.47e-11	2.95e-11	RGS1/RGS10/CCL3/CCL4/DOCK8/BIN1/SRGAP2/ARHGAP24/CCL3L1/RASGEF1B/PREX1/ARHGAP22/SEMA4D/CCL3L3/MAP4K4/ARHGAP25/TIAM1/CHN2/DOCK10/RCC2/RASGEF1C/RHOG/CCL5/C9orf72/TBC1D22A/ARHGAP27/TBC1D12/CCL4L1/ABR/RASGRP3/SIPA1/LIMS1/SNX9/VAV1/EZH2/SH3BP1/RAPGEF6/SIPA1L2/RABGAP1L/TBC1D4/PICALM/USP6NL/NDEL1/GPR65/S100A10/WNT5A/CCL2/ARAP1/TBC1D7/TBC1D9/CCL20/NEDD9/NET1/ADAP2/RGS16	55
BP	GO:0032956	regulation of actin cytoskeleton organization	55/1285	365/18903	2.07e-08	3.92e-07	2.58e-07	CSF1R/HCLS1/PLEK/BIN1/COTL1/CORO1A/SCIN/PTGER4/FSCN1/PYCARD/WAS/ABL2/GRB2/NCKAP1L/CAPG/CCDC88A/IL1A/PAK1/ARPC3/TMSB10/ARPC2/AKAP13/CYFIP1/ARPC1B/RHOG/TMSB4X/TGFBR1/ARHGAP18/PRKCD/C9orf72/ABI3/TRPM2/HCK/BAIAP2/SWAP70/FMN1/CXCL12/FCHSD2/SNX9/SH3BP1/RAC2/PIK3R1/RAC1/EDN1/GPR65/RHOH/S100A10/IQGAP2/ARAP1/CAPZA1/SSH1/PROX1/NEDD9/RHOB/GMFG	55
BP	GO:0043434	response to peptide hormone	55/1285	421/18903	2.32e-06	2.86e-05	1.88e-05	SORL1/NR4A2/CYBB/PTPRE/IL1B/NR4A1/NR4A3/BTG2/XBP1/LYN/NFKB1/FOS/IRS2/TLR2/PDE3B/LPIN2/GRB2/EGR2/UCP2/JUND/SYAP1/PTGS2/SOCS3/CYFIP1/HDAC9/INSIG1/PRKCD/INHBA/ATP2B1/SIRT1/SNX5/RAB31/BAIAP2/TNFSF10/PTPN2/CXCL12/CFLAR/JAK2/GNAI2/FOXO1/APPL2/SLC25A33/NFE2L2/KCNQ1/PIK3R1/TBC1D4/ZFP36L1/NDEL1/NUDC/EDN1/EGR1/SOCS1/PDK4/PIP4K2A/ANXA1	55
BP	GO:0010876	lipid localization	55/1285	483/18903	0.000117301	0.000871939	0.000574633	C3/SPP1/NFKBIA/SLCO2B1/IL1B/APOC1/TREM2/MSR1/NFKB1/IRS2/P2RX7/PLIN2/CHKA/ATP8B4/TNF/NPC2/SOAT1/SYK/PSAP/IL1A/ACSL1/ZC3H12A/PTGS2/ABCC4/CLN8/P2RX4/UGCG/SPNS2/PRKCD/INHBA/SIRT1/OSBPL11/APOE/PTPN2/DBI/NRIP1/DAB2/FBXW7/APOC2/KCNQ1/LDLR/PLA2G4A/HEXA/RNF213/OSBPL3/MFSD2A/EDN1/ABCG1/PNPLA8/SQLE/VMP1/ABCG2/PIP4K2A/ABCA1/ANXA1	55
BP	GO:0070665	positive regulation of leukocyte proliferation	54/1285	167/18903	4.99e-23	8.04e-21	5.3e-21	CD74/PTPRC/CSF1R/HLA-E/HLA-DPA1/AIF1/HAVCR2/HLA-DPB1/IL18/IL1B/CSF2RA/ST6GAL1/GPR183/FCGR3A/CORO1A/CDKN1A/LGALS9/HLA-DMB/LYN/CD86/RPS3/IRS2/PELI1/TLR4/IL6ST/PYCARD/CD55/NCKAP1L/SYK/PNP/IL1A/IGF1/BTK/RASAL3/CCL5/RIPK2/SLC39A10/CCDC88B/TFRC/ICOSLG/TNFSF13B/TMIGD2/JAK2/TNFRSF13C/HLA-A/EBI3/PPP3CA/RAC2/NFATC2/CARD11/CSF1/MEF2C/TNFSF9/ANXA1	54
BP	GO:0050866	negative regulation of cell activation	54/1285	221/18903	6.86e-17	5.93e-15	3.91e-15	CD74/PTPRC/LAPTM5/HLA-DRB1/TYROBP/ID2/SAMSN1/HAVCR2/CD84/HMOX1/LST1/LILRB4/SOCS6/RUNX1/TREM2/TNFAIP3/LGALS9/VSIG4/FGL2/LYN/CD86/INPP5D/SPI1/PELI1/PDGFB/PRNP/NCKAP1L/RASSF5/ATM/CD300A/ZC3H12A/BTK/GRN/PRKCD/INHBA/LILRB1/PTPN6/SMAD7/MERTK/APOE/CEBPB/PTPN2/SH2B3/IRF1/ARG2/LDLR/IL4I1/SPN/MILR1/SOCS1/HLX/RUNX3/NRARP/ANXA1	54
BP	GO:2000116	regulation of cysteine-type endopeptidase activity	54/1285	235/18903	1.18e-15	7.77e-14	5.12e-14	LAPTM5/GPX1/HSPD1/DNAJB6/HSPE1/CLEC7A/PMAIP1/NR4A1/SERPINB9/ARRB2/CTSH/LGALS9/IFI16/LGMN/RPS3/NLRP3/PLAUR/KLF4/PYCARD/NAIP/TNF/SYK/PTGS2/ARL6IP1/SNCA/CASP1/RPS6KA1/RIPK2/SIRT1/RPS6KA3/TNFSF10/CARD8/SIAH2/CST3/APAF1/MAP3K5/BIRC3/MICAL1/MYC/PIH1D1/CFLAR/CASP10/JAK2/GAS6/NLRP1/MALT1/CASP8/DDX3X/CRYAB/TNFSF14/BID/TNFAIP8/BCL2L11/VEGFA	54
BP	GO:0031348	negative regulation of defense response	54/1285	272/18903	7.1e-13	3.05e-11	2.01e-11	PTPRC/HLA-DRB1/GPX1/HLA-E/HAVCR2/RPS19/HLA-B/RHBDF2/HTRA1/TREM2/SERPINB9/ARRB2/TNFAIP3/PTGER4/LGALS9/VSIG4/FGL2/LYN/IFI16/NLRP3/NFKB1/SIGLEC10/ZFP36/MIR142/KLF4/AOAH/SAMHD1/SERPINF1/SIRPA/SYK/CYLD/TNFRSF1B/SOCS3/TRIM38/USP15/IGF1/GRN/PRKCD/LILRB1/RNF125/ALOX5/METRNL/HCK/APOE/IRAK3/PTPN2/PARP14/HAMP/PLK2/HLA-A/ARG2/YTHDF3/LDLR/DUSP10	54
BP	GO:0010959	regulation of metal ion transport	54/1285	423/18903	5.7e-06	6.39e-05	4.21e-05	CCL3/CCL4/BIN1/CD84/CORO1A/TREM2/CXCR4/ARRB2/LYN/SLC8A1/ATP1B1/PDGFB/PRNP/ADRB2/P2RX7/ATP1A1/YWHAH/CCR1/SIK1/PTGS2/FXYD5/GLRX/HOMER1/CHD7/P2RX4/SNCA/CCL5/EPB41/ATP2B1/LILRB1/CACNB4/PTPN6/SCN1B/HOMER3/PDE4B/CXCL12/IL16/PLCG2/HAMP/PIK3CG/GNAI2/WNK1/SLC30A1/KCNQ1/KCNMB1/CD33/OXSR1/PPP3CA/SLC8B1/GSTM2/KCNJ2/CCL2/SLC31A2/VMP1	54
BP	GO:0016049	cell growth	54/1285	493/18903	0.000357109	0.00228534	0.0015061	SPP1/HSP90AA1/SGK1/RGS2/HSPA1A/HSP90AB1/HSPA1B/CXCL16/CXCR4/CDKN1A/NPM1/TGFB1/SEMA4D/SDCBP/IFRD1/AKAP13/ARHGAP4/CYFIP1/IGF1/TGFBR1/RPS6KA1/C9orf72/INHBA/SIRT1/SMAD7/PTPRJ/RPS6KA3/APOE/ADAM10/SIPA1/CXCL12/DAB2/HAMP/ITSN2/SLC25A33/DIP2B/DDX3X/TMC8/EPB41L3/ALCAM/CRYAB/NDEL1/MFSD2A/EDN1/WNT5A/GOLGA4/HBEGF/CDKN2AIP/ADAM17/CDK11A/NET1/SPAG9/VEGFA/TSPYL2	54
BP	GO:0050920	regulation of chemotaxis	53/1285	230/18903	1.91e-15	1.21e-13	7.95e-14	CD74/CSF1R/CCL3/AIF1/DUSP1/CCL4/ST6GAL1/GPR183/C3AR1/CX3CR1/TREM2/CXCR4/P2RY12/LGALS9/STX4/LYN/LGMN/C5AR1/SPI1/PDGFB/SERPINE1/TGFB1/SEMA4D/NCKAP1L/CCR1/IL6R/PADI2/RIN3/TMSB4X/P2RX4/CCL5/SWAP70/ADAM10/PTPN2/CXCL12/IL16/WNK1/GPSM3/GAS6/OXSR1/RAC2/RAC1/SLC8B1/EDN1/WNT5A/CCL2/TNFSF14/ADAM17/MPP1/NEDD9/CSF1/SUCNR1/VEGFA	53
BP	GO:0002429	immune response-activating cell surface receptor signaling pathway	53/1285	312/18903	5.24e-10	1.37e-08	9.03e-09	PTPRC/LAPTM5/HLA-DRB1/TYROBP/HLA-DPB1/HLA-DQB1/FCER1G/LILRB4/ELF1/C3AR1/CLEC7A/NFKBID/NR4A3/LYN/RPS3/C5AR1/INPP5D/FPR1/LAT2/PRNP/KLHL6/NFKBIZ/NCKAP1L/SYK/BLNK/CD300A/PAK1/ZC3H12A/LCP2/BTK/PRKCD/RIPK2/SLC39A10/CACNB4/THEMIS2/PTPN6/PTPRJ/HCK/ICOSLG/PDE4B/PTPN2/LPXN/PLCG2/VAV1/WNK1/APPL2/HLA-A/MALT1/NFATC2/CARD11/PLCL2/PRKCH/MEF2C	53
BP	GO:0002757	immune response-activating signal transduction	53/1285	312/18903	5.24e-10	1.37e-08	9.03e-09	PTPRC/LAPTM5/HLA-DRB1/TYROBP/HLA-DPB1/HLA-DQB1/FCER1G/LILRB4/ELF1/C3AR1/CLEC7A/NFKBID/NR4A3/LYN/RPS3/C5AR1/INPP5D/FPR1/LAT2/PRNP/KLHL6/NFKBIZ/NCKAP1L/SYK/BLNK/CD300A/PAK1/ZC3H12A/LCP2/BTK/PRKCD/RIPK2/SLC39A10/CACNB4/THEMIS2/PTPN6/PTPRJ/HCK/ICOSLG/PDE4B/PTPN2/LPXN/PLCG2/VAV1/WNK1/APPL2/HLA-A/MALT1/NFATC2/CARD11/PLCL2/PRKCH/MEF2C	53
BP	GO:0042692	muscle cell differentiation	53/1285	409/18903	4.48e-06	5.12e-05	3.38e-05	GPX1/BHLHE41/RGS2/CD53/ID2/MEF2A/SOD2/BIN1/PLEKHO1/KDM6B/ARRB2/XBP1/SLC8A1/DOCK2/PDGFB/NINJ1/TGFB1/TMEM119/IFRD1/SIK1/AKAP13/HDAC9/HOMER1/IGF1/HNRNPU/CACNB4/SIRT1/PIEZO1/RYR1/CFLAR/NFATC1/HAMP/ALPK3/RBM38/EZH2/SKI/KRAS/PPP3CA/AKIRIN2/PGM5/JAM2/NFATC2/EDN1/MDM2/TNFSF14/MAML1/PROX1/PDCD4/MORF4L2/SPAG9/QKI/MEF2C/VEGFA	53
BP	GO:0022613	ribonucleoprotein complex biogenesis	53/1285	489/18903	0.000518115	0.0031292	0.00206224	HSP90AA1/HSP90AB1/CELF2/RPS19/RPS24/DDX21/EIF5/RPS6/NPM1/RPL13A/RPL38/RPS14/RPL11/RPS21/RPLP0/RPL26/EIF4A3/ATM/RPS8/RPSA/RPL27/ISG20L2/RPL10/NAF1/USP36/CHD7/RPS16/GLUL/RPS28/RPL14/ABCE1/RPL5/GTPBP4/PIH1D1/PTGES3/NOP58/GNL2/EIF3F/DDX3X/RRP12/RPS27/RPS15/RPL24/UTP6/YTHDC1/RPL10A/RPS5/USP4/DDX27/RPS25/SETX/NOP56/ISG20	53
BP	GO:0042129	regulation of T cell proliferation	52/1285	182/18903	1.63e-19	1.82e-17	1.2e-17	PTPRC/HLA-DRB1/HLA-E/HLA-DPA1/AIF1/HAVCR2/HLA-DPB1/IL18/IL1B/LILRB4/CORO1A/LGALS9/HLA-DMB/VSIG4/CD86/RPS3/PELI1/PRNP/IL6ST/PYCARD/CD55/NCKAP1L/SYK/PNP/IL1A/TNFRSF1B/IGF1/RASAL3/CCL5/RIPK2/LILRB1/CCDC88B/PTPN6/TFRC/CEBPB/ICOSLG/TNFSF13B/TMIGD2/JAK2/IRF1/TNFRSF13C/HLA-A/EBI3/ARG2/PPP3CA/IL4I1/RAC2/CARD11/SPN/BID/TNFSF9/ANXA1	52
BP	GO:0045637	regulation of myeloid cell differentiation	52/1285	214/18903	3.32e-16	2.47e-14	1.63e-14	CD74/HLA-DRB1/TYROBP/CCL3/C1QC/ID2/HCLS1/NFKBIA/HSPA1A/CSF3R/HSPA1B/LILRB4/EVI2B/RUNX1/TREM2/SCIN/KLF10/MAFB/LYN/INPP5D/FOS/SPI1/TLR4/ZFP36/TGFB1/TRIB1/NCKAP1L/CCR1/TNF/TAL1/RASSF2/INHBA/LILRB1/CEBPB/PTPN2/MYC/IRF7/CASP8/HSPA9/FBXW7/PPP3CA/PIK3R1/PURB/ZFP36L1/TLR3/PRKCA/CDK6/FOXO3/NEDD9/CSF1/MEF2C/HIF1A	52
BP	GO:0071356	cellular response to tumor necrosis factor	52/1285	234/18903	1.71e-14	9.84e-13	6.48e-13	LAPTM5/ZFP36L2/CCL3/KLF2/CCL4/NFKBIA/HSPA1A/HSPA1B/CCL3L1/TNFAIP3/RPS3/CEBPA/NFKB1/FOS/ZFP36/PYCARD/CCL3L3/NAIP/TNF/SYK/CYLD/TNFRSF1B/GBP2/ZC3H12A/TMSB4X/CASP1/CCL5/SIRT1/CARD8/ARHGEF2/CCL4L1/MAP3K5/PTPN2/BIRC3/TNFSF13B/NFATC1/LIMS1/HAMP/JAK2/TNFRSF13C/PLVAP/GAS6/NFE2L2/CASP8/TANK/ZFP36L1/EDN1/CASP4/CCL2/ADAM17/FOXO3/CCL20	52
BP	GO:0007265	Ras protein signal transduction	52/1285	353/18903	1.06e-07	1.73e-06	1.14e-06	AIF1/ARHGAP24/CDKN1A/ELMO1/RASGEF1B/LPAR6/GNA13/JUN/WAS/ABL2/MCF2L/GRB2/MAP4K4/CYTH4/SDCBP/MYO9B/TIAM1/RASGEF1C/AKAP13/ARHGAP4/CYFIP1/RHOG/IGF1/RAP2B/CYTH1/PDPN/RASAL3/DOK2/APOE/CDC42SE1/ARHGEF2/RASA3/RASGRP3/PIK3CG/PLK2/ARHGEF1/SH3BP1/NUP62/DOK1/RAPGEF6/KRAS/RAC2/RAC1/CDC42SE2/GPR65/RHOH/SQSTM1/CSF1/NET1/RHOB/SPRY2/ABCA1	52
BP	GO:0032535	regulation of cellular component size	52/1285	367/18903	3.69e-07	5.4e-06	3.56e-06	SPP1/HSP90AA1/HCLS1/PLEK/BIN1/HSP90AB1/PPP1R15A/COTL1/CORO1A/SCIN/NPM1/P2RX7/PYCARD/WAS/SEMA4D/GRB2/NCKAP1L/CAPG/IFRD1/ARPC3/TMSB10/ARPC2/ARHGAP4/CYFIP1/ARPC1B/CLN8/RIN3/TMSB4X/ARHGAP18/PRKCD/HCK/BAIAP2/APOE/SWAP70/FMN1/CXCL12/KCNMA1/FCHSD2/SNX9/VAV1/SH3BP1/DIP2B/PICALM/RAC1/NDEL1/EDN1/DEPTOR/WNT5A/GOLGA4/CAPZA1/SSH1/VEGFA	52
BP	GO:0050767	regulation of neurogenesis	52/1285	377/18903	8.53e-07	1.16e-05	7.62e-06	BHLHE41/SKIL/SPP1/SORL1/ID2/IL1B/BIN1/CX3CR1/TREM2/CXCR4/LYN/MBP/MIR142/TLR2/IL6ST/TGFB1/SEMA4D/SLC7A5/YWHAH/EGR2/IFRD1/TNF/SERPINF1/TIAM1/TNFRSF1B/ARHGAP4/CYFIP1/CHD7/ACTR2/BAIAP2/BHLHE40/CXCL12/APPL2/EZH2/SKI/DIP2B/KRAS/LDLR/PPP3CA/NDEL1/PLAG1/DNAJB11/S100A10/WNT5A/GOLGA4/DUSP10/PRKCH/PROX1/RHEB/HES6/VEGFA/HIF1A	52
BP	GO:0050878	regulation of body fluid levels	52/1285	390/18903	2.38e-06	2.93e-05	1.93e-05	PLEK/IL18/FCER1G/P2RY12/XBP1/LYN/PABPC4/TLR4/PDGFB/PLAUR/IL6ST/SERPINE1/GNA13/KLF4/WAS/RPLP0/ENTPD1/SYK/FERMT3/SERPINA1/HK2/VAMP8/RAP2B/GNAQ/PDPN/UGCG/PRKCD/PTPN6/BLOC1S6/MERTK/APOE/MMRN1/FLI1/JMJD1C/SH2B3/PLCG2/JAK2/PIK3CG/VAV1/GNAI2/WNK1/GAS6/NFE2L2/PPP3CA/PLA2G4A/EDN1/GNAS/PRKCA/PRKACB/DGKA/VEGFA/HIF1A	52
BP	GO:0006816	calcium ion transport	52/1285	440/18903	6.92e-05	0.000562025	0.000370391	PTPRC/CCL3/CCL4/BIN1/TPT1/CD84/CORO1A/CXCR4/ARRB2/LYN/SLC8A1/ATP1B1/PDGFB/PRNP/ATP2C1/P2RX7/CCR1/PTGS2/HOMER1/CHD7/P2RX4/SNCA/CCL5/EPB41/ATP2B1/LILRB1/CACNB4/PTPN6/TRPM2/HOMER3/RYR1/RASA3/PDE4B/RAMP1/CXCL12/IL16/DDIT3/PLCG2/PIK3CG/GNAI2/GAS6/SLC30A1/CD33/PPP3CA/SLC8B1/GSTM2/EDN1/ITPR2/CCL2/CACNA1A/SLC3A2/VMP1	52
BP	GO:0032635	interleukin-6 production	51/1285	176/18903	1.85e-19	1.99e-17	1.31e-17	CD74/TYROBP/AIF1/KLF2/HSPD1/HAVCR2/IL1B/CD84/HLA-B/LILRB4/CLEC7A/TREM2/ARRB2/TNFAIP3/LGALS9/XBP1/MBP/INPP5D/TLR4/TLR2/PTAFR/P2RX7/PYCARD/POU2F2/NCKAP1L/TNF/SIRPA/SYK/IL1A/ZC3H12A/IL6R/TLR1/IL17RA/BTK/TLR7/TLR6/RIPK2/PTPN6/IL1RAP/CEBPB/ARID5A/TMEM106A/ARHGEF2/IRAK3/IL16/PLCG2/GAS6/SCIMP/AKIRIN2/TLR3/WNT5A	51
BP	GO:0032675	regulation of interleukin-6 production	51/1285	176/18903	1.85e-19	1.99e-17	1.31e-17	CD74/TYROBP/AIF1/KLF2/HSPD1/HAVCR2/IL1B/CD84/HLA-B/LILRB4/CLEC7A/TREM2/ARRB2/TNFAIP3/LGALS9/XBP1/MBP/INPP5D/TLR4/TLR2/PTAFR/P2RX7/PYCARD/POU2F2/NCKAP1L/TNF/SIRPA/SYK/IL1A/ZC3H12A/IL6R/TLR1/IL17RA/BTK/TLR7/TLR6/RIPK2/PTPN6/IL1RAP/CEBPB/ARID5A/TMEM106A/ARHGEF2/IRAK3/IL16/PLCG2/GAS6/SCIMP/AKIRIN2/TLR3/WNT5A	51
BP	GO:0034599	cellular response to oxidative stress	51/1285	288/18903	2.45e-10	6.84e-09	4.51e-09	GPX1/AIF1/KLF2/NR4A2/HSPA1A/SOD2/HSPA1B/HMOX1/MCL1/TREM2/KDM6B/TNFAIP3/NR4A3/STX4/RPS3/FOS/TLR4/JUN/TNF/SIRPA/ZC3H12A/PPIF/SFPQ/BTK/OSER1/SNCA/TLR6/NCF1/PRKCD/GCH1/SIRT1/ALOX5/TRPM2/ERN1/MAP3K5/JAK2/FOXO1/EZH2/NFE2L2/FBXW7/ETV5/EDN1/MMP2/NCOA7/FOXO3/PNPLA8/NET1/SETX/RHOB/HIF1A/ANXA1	51
BP	GO:0070372	regulation of ERK1 and ERK2 cascade	51/1285	315/18903	6.02e-09	1.25e-07	8.22e-08	CD74/PTPRC/HLA-DRB1/CSF1R/CCL3/CCL4/HAVCR2/IL1B/GPR183/CCL3L1/TREM2/ARRB2/LGALS9/LYN/C5AR1/TLR4/PDGFB/TGFB1/PYCARD/JUN/CCL3L3/ICAM1/CCR1/TNF/SIRPA/SYK/IL1A/IGF1/ATF3/CCL5/RIPK2/INHBA/PTPN6/RANBP9/APOE/CCL4L1/PTPN2/CFLAR/DUSP4/DAB2/DUSP6/GNAI2/GAS6/SCIMP/FBXW7/CCL2/PRKCA/DUSP10/CCL20/GCNT2/SPRY2	51
BP	GO:0070482	response to oxygen levels	51/1285	337/18903	5.85e-08	1.02e-06	6.71e-07	NR4A2/SOD2/CYBB/HMOX1/PLK3/PMAIP1/TREM2/CXCR4/FOS/SLC8A1/ATP1B1/TLR2/SLC7A5/UCP2/JUND/TNF/ATM/IL1A/PTGS2/HK2/CPEB4/PDPN/DDIT4/SLC11A2/SIRT1/TFRC/NDRG1/RYR1/APAF1/CXCL12/MYC/KCNMA1/CFLAR/FOXO1/NFE2L2/VHL/KCNMB1/CRYAB/ZFP36L1/POLB/EDN1/MMP2/MDM2/EGR1/ITPR2/CITED2/MTHFR/ADAM17/FOXO3/VEGFA/HIF1A	51
BP	GO:0010631	epithelial cell migration	51/1285	366/18903	7.97e-07	1.09e-05	7.18e-06	GPX1/HMOX1/DNAJA4/EGR3/CORO1A/NR4A1/CTSH/LGMN/IRS2/RIN2/PDGFB/TGFB1/KLF4/JUN/MAP4K4/MAP2K3/TNF/SERPINF1/VASH1/ZC3H12A/PTGS2/HDAC9/TMSB4X/P2RX4/TGFBR1/MIR29A/GRN/GLUL/SIRT1/APOE/LPXN/PLCG2/PIK3CG/PLK2/SH3BP1/NFE2L2/FBXW7/RAC1/EDN1/WNT5A/PRKCA/HBEGF/DUSP10/PROX1/ADAM17/ZEB2/RHOB/MEF2C/VEGFA/HIF1A/ANXA1	51
BP	GO:0090132	epithelium migration	51/1285	369/18903	1.02e-06	1.35e-05	8.88e-06	GPX1/HMOX1/DNAJA4/EGR3/CORO1A/NR4A1/CTSH/LGMN/IRS2/RIN2/PDGFB/TGFB1/KLF4/JUN/MAP4K4/MAP2K3/TNF/SERPINF1/VASH1/ZC3H12A/PTGS2/HDAC9/TMSB4X/P2RX4/TGFBR1/MIR29A/GRN/GLUL/SIRT1/APOE/LPXN/PLCG2/PIK3CG/PLK2/SH3BP1/NFE2L2/FBXW7/RAC1/EDN1/WNT5A/PRKCA/HBEGF/DUSP10/PROX1/ADAM17/ZEB2/RHOB/MEF2C/VEGFA/HIF1A/ANXA1	51
BP	GO:0090130	tissue migration	51/1285	374/18903	1.53e-06	1.95e-05	1.29e-05	GPX1/HMOX1/DNAJA4/EGR3/CORO1A/NR4A1/CTSH/LGMN/IRS2/RIN2/PDGFB/TGFB1/KLF4/JUN/MAP4K4/MAP2K3/TNF/SERPINF1/VASH1/ZC3H12A/PTGS2/HDAC9/TMSB4X/P2RX4/TGFBR1/MIR29A/GRN/GLUL/SIRT1/APOE/LPXN/PLCG2/PIK3CG/PLK2/SH3BP1/NFE2L2/FBXW7/RAC1/EDN1/WNT5A/PRKCA/HBEGF/DUSP10/PROX1/ADAM17/ZEB2/RHOB/MEF2C/VEGFA/HIF1A/ANXA1	51
BP	GO:0050678	regulation of epithelial cell proliferation	51/1285	414/18903	2.73e-05	0.000250158	0.000164861	GPX1/NEAT1/STK4/HMOX1/EGR3/HTRA1/NR4A1/TNFAIP3/NR4A3/B4GALT1/XBP1/C5AR1/IRS2/ZFP36/PDGFB/TGFB1/JUN/HMGN1/TNF/SERPINF1/VASH1/IGF1/BTK/TGFBR1/MIR29A/GRN/GLUL/SIRT1/ALOX5/APOE/CXCL12/MYC/CFLAR/DAB2/FBXW7/ZFP36L1/WNT5A/CCL2/PRKCA/DUSP10/PROX1/CDK6/ADAM17/BID/FLT1/HLX/RUNX3/MEF2C/VEGFA/HIF1A/NRARP	51
BP	GO:0072594	establishment of protein localization to organelle	51/1285	449/18903	0.000217494	0.00149058	0.000982335	LAPTM5/SORL1/HSP90AA1/HCLS1/NFKBIA/HSPD1/HSP90AB1/DNAJA1/STK4/CD68/ZFAND2A/BAG3/IL10RA/HSPA8/TNFAIP3/CDKN1A/TGFB1/HERPUD1/RPL23/TCP1/SYK/UBE2D3/ZC3H12A/PTGS2/HK2/USP36/VPS37B/PRKCD/HSPA5/MAN1A1/RANBP2/CCT4/PIH1D1/DDIT3/JAK2/APPL2/NUP62/KPNA4/FBXW7/PPP3CA/RAC2/AKIRIN2/PIK3R1/IPO7/SQSTM1/POM121/FAM53B/BID/FAM53C/HSPA1L/KPNA2	51
BP	GO:0046700	heterocycle catabolic process	51/1285	468/18903	0.000578253	0.00344575	0.00227085	RNASET2/PABPC1/ZFP36L2/HSPA1A/SLCO2B1/HSPA1B/HMOX1/TYMP/SLC11A1/BTG2/PABPC4/NPM1/ZFP36/SAMHD1/ENTPD1/EIF4A3/NUDT3/DDX5/PNP/ATM/TNFRSF1B/ZC3H12A/ETF1/NAF1/DNASE2/RNASE6/HNRNPC/HNRNPU/ZC3HAV1/PRKCD/UPP1/DEDD2/MGAT1/ERN1/PDE4B/APAF1/GSPT1/DCP2/TET2/RBM38/NFE2L2/YTHDF3/FHIT/IL4I1/ZFP36L1/AMPD3/PRKCA/PDE7A/MBD4/KCNQ1OT1/ISG20	51
BP	GO:0032946	positive regulation of mononuclear cell proliferation	50/1285	149/18903	3.15e-22	4.68e-20	3.08e-20	CD74/PTPRC/HLA-E/HLA-DPA1/AIF1/HAVCR2/HLA-DPB1/IL18/IL1B/ST6GAL1/GPR183/FCGR3A/CORO1A/CDKN1A/LGALS9/HLA-DMB/CD86/RPS3/IRS2/PELI1/TLR4/IL6ST/PYCARD/CD55/NCKAP1L/SYK/PNP/IL1A/IGF1/BTK/RASAL3/CCL5/RIPK2/SLC39A10/CCDC88B/TFRC/ICOSLG/TNFSF13B/TMIGD2/JAK2/TNFRSF13C/HLA-A/EBI3/PPP3CA/NFATC2/CARD11/CSF1/MEF2C/TNFSF9/ANXA1	50
BP	GO:1902107	positive regulation of leukocyte differentiation	50/1285	184/18903	8.4e-18	7.98e-16	5.26e-16	CD74/PTPRC/HLA-DRA/HLA-DRB1/CD83/TYROBP/ID2/HCLS1/IL18/LILRB4/EVI2B/EGR3/RUNX1/TREM2/NFKBID/KLF10/LGALS9/XBP1/CD86/INPP5D/NLRP3/FOS/TGFB1/TRIB1/NFKBIZ/NCKAP1L/CCR1/TNF/SYK/PNP/BTK/RIPK2/GAS6/MALT1/CASP8/PPP3CA/IL4I1/ZFP36L1/RHOH/PRKCA/DUSP10/ZBTB1/SOCS1/FOXO3/NEDD9/CSF1/HLX/RUNX3/TNFSF9/ANXA1	50
BP	GO:1903708	positive regulation of hemopoiesis	50/1285	184/18903	8.4e-18	7.98e-16	5.26e-16	CD74/PTPRC/HLA-DRA/HLA-DRB1/CD83/TYROBP/ID2/HCLS1/IL18/LILRB4/EVI2B/EGR3/RUNX1/TREM2/NFKBID/KLF10/LGALS9/XBP1/CD86/INPP5D/NLRP3/FOS/TGFB1/TRIB1/NFKBIZ/NCKAP1L/CCR1/TNF/SYK/PNP/BTK/RIPK2/GAS6/MALT1/CASP8/PPP3CA/IL4I1/ZFP36L1/RHOH/PRKCA/DUSP10/ZBTB1/SOCS1/FOXO3/NEDD9/CSF1/HLX/RUNX3/TNFSF9/ANXA1	50
BP	GO:0002221	pattern recognition receptor signaling pathway	50/1285	187/18903	1.76e-17	1.62e-15	1.07e-15	CTSS/NFKBIA/HSPD1/HAVCR2/HSPA1A/HSPA1B/TREM2/ARRB2/TNFAIP3/LYN/NLRP3/PELI1/TLR4/TLR2/CD14/NINJ1/PYCARD/IRAK2/NAIP/TNF/CD300A/CYLD/USP15/TLR1/LY96/BTK/TLR7/TLR6/CASP1/SLC15A2/RIPK2/RNF125/RPS6KA3/TLR5/IRAK3/BIRC3/SLC15A3/PIK3AP1/PLCG2/IRF7/IRF1/APPL2/NLRP1/SCIMP/OASL/DDX3X/UNC93B1/TLR3/ALPK1/TLR10	50
BP	GO:0043281	regulation of cysteine-type endopeptidase activity involved in apoptotic process	50/1285	205/18903	1.05e-15	7.1e-14	4.68e-14	LAPTM5/GPX1/HSPD1/DNAJB6/HSPE1/CLEC7A/PMAIP1/NR4A1/SERPINB9/ARRB2/CTSH/LGALS9/RPS3/NLRP3/PLAUR/KLF4/PYCARD/NAIP/TNF/SYK/PTGS2/ARL6IP1/SNCA/CASP1/RPS6KA1/SIRT1/RPS6KA3/TNFSF10/CARD8/SIAH2/APAF1/MAP3K5/BIRC3/MICAL1/MYC/PIH1D1/CFLAR/CASP10/JAK2/GAS6/NLRP1/MALT1/CASP8/DDX3X/CRYAB/TNFSF14/BID/TNFAIP8/BCL2L11/VEGFA	50
BP	GO:0002285	lymphocyte activation involved in immune response	50/1285	207/18903	1.61e-15	1.05e-13	6.89e-14	CD74/PTPRC/HLA-DRA/HLA-DRB1/APBB1IP/HSPD1/HAVCR2/JUNB/IL18/LCP1/GPR183/FCER1G/FCGR3A/CORO1A/NFKBID/IRF8/PTGER4/LGALS9/SLC11A1/HLA-DMB/XBP1/FGL2/CD86/RPS6/NLRP3/SPI1/TLR4/TGFB1/NFKBIZ/NCKAP1L/ICAM1/DOCK10/ZC3H12A/IL6R/ST3GAL1/RELB/RIPK2/LILRB1/SMAD7/TFRC/SWAP70/ERCC1/PLCG2/MALT1/ITGAL/SPN/ITFG2/PLCL2/HLX/ANXA1	50
BP	GO:0097191	extrinsic apoptotic signaling pathway	50/1285	224/18903	4.56e-14	2.38e-12	1.57e-12	PTPRC/GPX1/SKIL/HSPA1A/IL1B/HSPA1B/STK4/HMOX1/BAG3/PMAIP1/MCL1/TNFAIP3/BCL2A1/STX4/SPI1/G0S2/SERPINE1/P2RX7/TGFB1/PYCARD/ICAM1/TNF/IL1A/CYLD/TNFRSF1B/IL6R/IGF1/TGFBR1/ATF3/INHBA/DEDD2/MKNK2/TNFSF10/ARHGEF2/TNFRSF10B/SIAH2/CFLAR/JAK2/TNFRSF12A/CASP8/DDX3X/TMC8/PIK3R1/TLR3/DEPTOR/MLLT11/ITPRIP/FOXO3/BID/BCL2L11	50
BP	GO:0043122	regulation of I-kappaB kinase/NF-kappaB signaling	50/1285	255/18903	8.19e-12	3.08e-10	2.03e-10	CD74/REL/HLA-DRB1/IL1B/HMOX1/LILRB4/CLEC7A/DDX21/TREM2/TNFAIP3/LGALS9/LITAF/PELI1/TLR4/ATP2C1/PYCARD/SLC20A1/TNF/IL1A/ZC3H12A/AKAP13/TRIM38/TAB2/TLR6/CASP1/RIPK2/SIRT1/TFRC/TNFSF10/CARD8/TMEM106A/TNFRSF10B/BIRC3/CFLAR/PLCG2/CASP10/TRIM22/PLK2/NFKBIB/MALT1/CASP8/NUP62/TANK/TLR3/CARD11/S100A4/RHOH/WNT5A/ALPK1/SQSTM1	50
BP	GO:0040013	negative regulation of locomotion	50/1285	419/18903	7.42e-05	0.00059515	0.000392221	CD74/AIF1/DUSP1/ADORA3/ST6GAL1/HMOX1/SRGAP2/DNAJA4/CX3CR1/NAV3/PTGER4/LDLRAD4/SERPINE1/GNA13/TGFB1/KLF4/TRIB1/WAS/SEMA4D/TNF/SERPINF1/CD300A/VASH1/ARRDC3/PADI2/ARHGAP4/SRGAP1/RIN3/RAP2B/SRGAP3/MIR29A/SMAD7/PTPRJ/APOE/SPINT2/PTPN2/CXCL12/GTPBP4/NFE2L2/RAC1/WNT5A/CCL2/ARID4A/DUSP10/CITED2/FOXO3/SAP30/NEDD9/RHOB/MEF2C	50
BP	GO:0001503	ossification	50/1285	429/18903	0.000133788	0.000983099	0.000647891	SRGN/CCL3/SPP1/JUNB/HSPE1/DDX21/RUNX1/BMP2K/PTGER4/KLF10/CEBPA/SLC8A1/ADRB2/IL6ST/P2RX7/TGFB1/SEMA4D/RPL38/EGR2/TMEM119/CCR1/JUND/TNF/DDX5/CHSY1/IL6R/PTGS2/HNRNPC/IGF1/RASSF2/HNRNPU/ATP2B1/ALOX5/SMAD7/RRBP1/DHRS3/CEBPB/RYR1/GTPBP4/SNX10/SKI/PPP3CA/RPS15/MMP2/WNT5A/CDK6/CSF1/RUNX3/MEF2C/HIF1A	50
BP	GO:0003012	muscle system process	50/1285	455/18903	0.00053918	0.00322618	0.00212615	HSP90AA1/RGS2/AIF1/MEF2A/IL1B/BIN1/TPM3/DOCK4/HMOX1/NR4A1/CXCR4/NR4A3/SLC8A1/ATP1B1/ADRB2/IL6ST/PTAFR/ATP1A1/GAA/GATM/MAP2K3/TNF/TNFRSF1B/ZC3H12A/PTGS2/AKAP13/HOMER1/IGF1/P2RX4/ATP2B1/SCN1B/SMAD7/RYR1/PDE4B/KCNMA1/CFLAR/HAMP/PIK3CG/FOXO1/EZH2/ARG2/KCNQ1/PPP3CA/CRYAB/DSC2/GSTM2/EDN1/KCNJ2/PRKCA/FOXO3	50
BP	GO:0044270	cellular nitrogen compound catabolic process	50/1285	474/18903	0.00133027	0.00697824	0.00459886	RNASET2/PABPC1/ZFP36L2/HSPA1A/SLCO2B1/HSPA1B/HMOX1/TYMP/SLC11A1/BTG2/PABPC4/NPM1/ZFP36/SAMHD1/ENTPD1/EIF4A3/NUDT3/DDX5/PNP/ATM/TNFRSF1B/ZC3H12A/ETF1/NAF1/DNASE2/RNASE6/HNRNPC/HNRNPU/ZC3HAV1/PRKCD/UPP1/DEDD2/MGAT1/ERN1/PDE4B/APAF1/GSPT1/DCP2/TET2/RBM38/YTHDF3/FHIT/IL4I1/ZFP36L1/AMPD3/PRKCA/PDE7A/MBD4/KCNQ1OT1/ISG20	50
BP	GO:0019439	aromatic compound catabolic process	50/1285	489/18903	0.0025493	0.0120267	0.00792597	RNASET2/PABPC1/ZFP36L2/HSPA1A/SLCO2B1/HSPA1B/HMOX1/TYMP/SLC11A1/BTG2/PABPC4/NPM1/ZFP36/SAMHD1/ENTPD1/EIF4A3/NUDT3/DDX5/PNP/ATM/TNFRSF1B/ZC3H12A/ETF1/NAF1/DNASE2/RNASE6/HNRNPC/HNRNPU/ZC3HAV1/PRKCD/UPP1/DEDD2/MGAT1/ERN1/PDE4B/APAF1/GSPT1/DCP2/TET2/RBM38/YTHDF3/FHIT/IL4I1/ZFP36L1/AMPD3/PRKCA/PDE7A/MBD4/KCNQ1OT1/ISG20	50
BP	GO:0002687	positive regulation of leukocyte migration	49/1285	148/18903	1.61e-21	2.17e-19	1.43e-19	CD74/CSF1R/CCL3/AIF1/CCL4/DOCK8/C3AR1/CX3CR1/CORO1A/TREM2/P2RY12/LGALS9/LGMN/C5AR1/SPI1/SERPINE1/PTAFR/PYCARD/ABL2/NCKAP1L/ICAM1/CCR1/TNF/IL1A/IL6R/P2RX4/CCL5/SWAP70/ADAM10/CXCL12/LYVE1/WNK1/GPSM3/PLVAP/GAS6/OXSR1/RAC2/PIK3R1/JAM2/RAC1/EDN1/SPN/WNT5A/TNFSF14/ADAM17/CCL20/NEDD9/CSF1/VEGFA	49
BP	GO:0071706	tumor necrosis factor superfamily cytokine production	49/1285	189/18903	1.45e-16	1.18e-14	7.8e-15	PTPRC/TYROBP/HLA-E/CCL3/HAVCR2/CYBB/CD84/FCGR3A/LILRB4/CLEC7A/CX3CR1/IFNGR1/TREM2/ARRB2/TNFAIP3/LGALS9/CD86/TLR4/ZFP36/TLR2/CD14/PTAFR/PYCARD/SIRPA/SYK/IL1A/ZC3H12A/IGF1/TLR1/LY96/BTK/RIPK2/LILRB1/PTPN6/PTPRJ/ARID5A/TMEM106A/ARHGEF2/IRAK3/PLCG2/JAK2/GAS6/ARG2/CD33/PIK3R1/TLR3/UBE2J1/SPN/WNT5A	49
BP	GO:1903555	regulation of tumor necrosis factor superfamily cytokine production	49/1285	189/18903	1.45e-16	1.18e-14	7.8e-15	PTPRC/TYROBP/HLA-E/CCL3/HAVCR2/CYBB/CD84/FCGR3A/LILRB4/CLEC7A/CX3CR1/IFNGR1/TREM2/ARRB2/TNFAIP3/LGALS9/CD86/TLR4/ZFP36/TLR2/CD14/PTAFR/PYCARD/SIRPA/SYK/IL1A/ZC3H12A/IGF1/TLR1/LY96/BTK/RIPK2/LILRB1/PTPN6/PTPRJ/ARID5A/TMEM106A/ARHGEF2/IRAK3/PLCG2/JAK2/GAS6/ARG2/CD33/PIK3R1/TLR3/UBE2J1/SPN/WNT5A	49
BP	GO:0002695	negative regulation of leukocyte activation	49/1285	198/18903	1.09e-15	7.3e-14	4.81e-14	CD74/PTPRC/LAPTM5/HLA-DRB1/TYROBP/ID2/SAMSN1/HAVCR2/CD84/HMOX1/LST1/LILRB4/SOCS6/RUNX1/TNFAIP3/LGALS9/VSIG4/FGL2/LYN/CD86/INPP5D/SPI1/PELI1/PRNP/NCKAP1L/RASSF5/ATM/CD300A/ZC3H12A/BTK/GRN/INHBA/LILRB1/PTPN6/SMAD7/MERTK/CEBPB/PTPN2/IRF1/ARG2/LDLR/IL4I1/SPN/MILR1/SOCS1/HLX/RUNX3/NRARP/ANXA1	49
BP	GO:0051348	negative regulation of transferase activity	49/1285	276/18903	5.04e-10	1.33e-08	8.75e-09	PTPRC/SORL1/RGS2/DUSP1/IL1B/DNAJA1/GADD45B/LILRB4/RPS20/RPL37/TNFAIP3/CDKN1A/CHORDC1/LYN/CEBPA/IRS2/SLC8A1/NPM1/ZFP36/PYCARD/TRIB1/RPL23/RPL11/PRKAG2/CD300A/HHEX/MIDN/GNAQ/SNCA/HNRNPU/PRKCD/SIRT1/PTPN6/SMAD7/PTPRJ/APOE/IRAK3/PTPN2/RPL5/PIK3IP1/SH2B3/NUP62/RPS15/IPO7/DEPTOR/DUSP10/PDCD4/PIP4K2A/SPRY2	49
BP	GO:0019216	regulation of lipid metabolic process	49/1285	347/18903	8.81e-07	1.19e-05	7.81e-06	CD74/C3/SORL1/ID2/IL1B/APOC1/TREM2/NR4A3/P2RY12/LYN/NFKB1/IRS2/PDGFB/TGFB1/PDE3B/ATP1A1/TNF/NPC2/PRKAG2/PSAP/IL1A/SIK1/DAGLB/PTGS2/SNCA/INSIG1/PRKCD/SIRT1/MLXIPL/APOE/PIK3IP1/DAB2/PLCG2/PIK3CG/APPL2/FBXW7/APOC2/LDLR/LACTB/RNF213/MFSD2A/EGR1/ABCG1/PROX1/PDK4/FLT1/IDH1/PIP4K2A/ANXA1	49
BP	GO:0051346	negative regulation of hydrolase activity	49/1285	373/18903	6.99e-06	7.66e-05	5.05e-05	GPX1/C3/CTSB/SORL1/RGS2/BIN1/DNAJB6/PPP1R15A/APOC1/NR4A1/SERPINB9/ARRB2/IFI16/PLAUR/PRNP/SERPINE1/KLF4/SEMA4D/NCKAP1L/NAIP/TNF/SERPINF1/RCC2/PTGS2/SERPINA1/HDAC9/ARL6IP1/SNCA/RPS6KA1/RPS6KA3/CARD8/ABCE1/SPINT2/SIAH2/CST3/BIRC3/MICAL1/PIH1D1/GNAI2/WNK1/GAS6/DDX3X/PICALM/CRYAB/TNFSF14/TNFAIP8/VEGFA/SPRY2/ANXA1	49
BP	GO:0001558	regulation of cell growth	49/1285	422/18903	0.000170157	0.00120608	0.000794841	SPP1/SGK1/RGS2/HSPA1A/HSPA1B/CXCL16/CXCR4/CDKN1A/NPM1/TGFB1/SEMA4D/SDCBP/IFRD1/ARHGAP4/CYFIP1/IGF1/TGFBR1/RPS6KA1/INHBA/SIRT1/SMAD7/PTPRJ/RPS6KA3/APOE/ADAM10/SIPA1/CXCL12/DAB2/HAMP/ITSN2/SLC25A33/DIP2B/DDX3X/TMC8/EPB41L3/CRYAB/NDEL1/MFSD2A/EDN1/WNT5A/GOLGA4/HBEGF/CDKN2AIP/ADAM17/CDK11A/NET1/SPAG9/VEGFA/TSPYL2	49
BP	GO:0050671	positive regulation of lymphocyte proliferation	48/1285	146/18903	5.83e-21	7.35e-19	4.84e-19	CD74/PTPRC/HLA-E/HLA-DPA1/AIF1/HAVCR2/HLA-DPB1/IL18/IL1B/GPR183/FCGR3A/CORO1A/CDKN1A/LGALS9/HLA-DMB/CD86/RPS3/IRS2/PELI1/TLR4/IL6ST/PYCARD/CD55/NCKAP1L/SYK/PNP/IL1A/IGF1/BTK/RASAL3/CCL5/RIPK2/SLC39A10/CCDC88B/TFRC/ICOSLG/TNFSF13B/TMIGD2/JAK2/TNFRSF13C/HLA-A/EBI3/PPP3CA/NFATC2/CARD11/MEF2C/TNFSF9/ANXA1	48
BP	GO:0050729	positive regulation of inflammatory response	48/1285	154/18903	7.4e-20	8.76e-18	5.77e-18	HLA-E/C3/CCL3/NFKBIA/NEAT1/IL18/IL1B/CTSC/FCGR1A/RPS19/ALOX5AP/TREM2/PTGER4/CEBPA/NLRP3/TLR4/MIR142/TLR2/IL6ST/SERPINE1/NINJ1/PYCARD/NFKBIZ/NAIP/TNF/OSM/PTGS2/VAMP8/IL17RA/BTK/SNCA/TLR7/GRN/CASP1/CEBPB/IL16/PLCG2/JAK2/PIK3CG/GPSM3/NLRP1/LDLR/TLR3/CASP4/WNT5A/TLR10/PDCD4/SUCNR1	48
BP	GO:0032640	tumor necrosis factor production	48/1285	184/18903	2.27e-16	1.73e-14	1.14e-14	PTPRC/TYROBP/HLA-E/CCL3/HAVCR2/CYBB/CD84/FCGR3A/LILRB4/CLEC7A/CX3CR1/IFNGR1/TREM2/ARRB2/TNFAIP3/LGALS9/TLR4/ZFP36/TLR2/CD14/PTAFR/PYCARD/SIRPA/SYK/IL1A/ZC3H12A/IGF1/TLR1/LY96/BTK/RIPK2/LILRB1/PTPN6/PTPRJ/ARID5A/TMEM106A/ARHGEF2/IRAK3/PLCG2/JAK2/GAS6/ARG2/CD33/PIK3R1/TLR3/UBE2J1/SPN/WNT5A	48
BP	GO:0032680	regulation of tumor necrosis factor production	48/1285	184/18903	2.27e-16	1.73e-14	1.14e-14	PTPRC/TYROBP/HLA-E/CCL3/HAVCR2/CYBB/CD84/FCGR3A/LILRB4/CLEC7A/CX3CR1/IFNGR1/TREM2/ARRB2/TNFAIP3/LGALS9/TLR4/ZFP36/TLR2/CD14/PTAFR/PYCARD/SIRPA/SYK/IL1A/ZC3H12A/IGF1/TLR1/LY96/BTK/RIPK2/LILRB1/PTPN6/PTPRJ/ARID5A/TMEM106A/ARHGEF2/IRAK3/PLCG2/JAK2/GAS6/ARG2/CD33/PIK3R1/TLR3/UBE2J1/SPN/WNT5A	48
BP	GO:0045619	regulation of lymphocyte differentiation	48/1285	210/18903	5.68e-14	2.91e-12	1.92e-12	CD74/PTPRC/HLA-DRA/HLA-DRB1/CD83/ZFP36L2/ID2/JUNB/IL18/LILRB4/EGR3/RUNX1/NFKBID/LGALS9/XBP1/FGL2/CD86/INPP5D/NLRP3/NFKBIZ/NCKAP1L/SYK/PNP/ZC3H12A/BTK/PRDM1/RIPK2/INHBA/PTPN6/SMAD7/PTPN2/IRF1/GAS6/MALT1/HLA-DOA/IL4I1/ZFP36L1/CARD11/RHOH/DUSP10/ZBTB1/SOCS1/FOXO3/HLX/RUNX3/TNFSF9/NRARP/ANXA1	48
BP	GO:0050730	regulation of peptidyl-tyrosine phosphorylation	48/1285	266/18903	4.28e-10	1.16e-08	7.61e-09	CD74/PTPRC/CSF1R/HCLS1/SAMSN1/ITGB2/IL18/FCGR1A/LILRB4/TREM2/ARRB2/LYN/PDGFB/PRNP/IL6ST/TGFB1/SEMA4D/ABI1/TNF/OSM/SYK/CD300A/EHD4/IL6R/SOCS3/IGF1/RAP2B/LRRK1/NCF1/PRKCD/CCL5/RIPK2/PTPN6/PTPRJ/ARHGEF2/ITGA5/PTPN2/SH2B3/PARP14/PLCG2/JAK2/GAS6/FBXW7/HBEGF/SOCS1/ADAM17/NEDD9/VEGFA	48
BP	GO:0042742	defense response to bacterium	48/1285	382/18903	2.81e-05	0.000255901	0.000168646	HLA-E/HAVCR2/IL18/IL1B/FCER1G/FCGR1A/RPS19/RPL39/TREM2/IRF8/SLC11A1/C5AR1/TLR4/TLR2/SERPINE1/P2RX7/PYCARD/NAIP/TNF/SYK/RPL30/GBP2/IL6R/RNASE6/TLR6/GRN/PRKCD/RIPK2/STAB1/CEBPB/TLR5/FAU/HAMP/HLA-A/LYST/NLRP1/ARG2/AKIRIN2/TREM1/MPEG1/RNF213/TLR3/LYZ/RAB1A/CASP4/SPN/ADAM17/CCL20	48
BP	GO:0006875	cellular metal ion homeostasis	48/1285	420/18903	0.00028568	0.00187373	0.00123484	PTPRC/FTL/CCL3/TPT1/HMOX1/CORO1A/SLC11A1/LYN/SLC8A1/ATP1B1/PRNP/ATP2C1/P2RX7/ATP1A1/HERPUD1/CCR1/IL1A/CHD7/SNCA/SLC11A2/CCL5/SLC39A10/ATP2B1/ATP13A3/PTPN6/TRPM2/TFRC/APOE/RYR1/RASA3/CXCL12/MYC/KCNMA1/DDIT3/PLCG2/HAMP/FTH1/SLC30A1/SLC8B1/GSTM2/EDN1/KCNJ2/WNT5A/ITPR2/TTC7A/SLC31A2/MT1X/HIF1A	48
BP	GO:0009410	response to xenobiotic stimulus	48/1285	432/18903	0.00054051	0.0032308	0.00212919	GPX1/HSP90AA1/SOD2/SLCO2B1/CYBB/IL1B/HSP90AB1/HMOX1/CXCR4/FOSB/LYN/FOS/SLC8A1/CD69/PRNP/P2RX7/JUN/PLIN2/ATP1A1/NCKAP1L/TNF/PNP/ACSL1/RNF149/PTGS2/ABCC4/SNCA/HSPA5/INHBA/TFRC/PDE4B/MYC/DUSP6/VAV1/GAS6/NFE2L2/KCNQ1/OXSR1/NFATC2/TLR3/GSTM2/EDN1/MMP2/MTHFR/TOP1/ADAM17/FOXO3/MEF2C	48
BP	GO:0045088	regulation of innate immune response	47/1285	240/18903	3.63e-11	1.17e-09	7.74e-10	TYROBP/HLA-E/HSP90AA1/HAVCR2/RPS19/HLA-B/CLEC7A/TREM2/SERPINB9/ARRB2/TNFAIP3/LGALS9/VSIG4/LYN/IFI16/SPI1/TLR4/PYCARD/SAMHD1/SYK/PAK1/USP15/SFPQ/NCF1/GRN/CCL5/LILRB1/PTPN6/HCK/APOE/IRAK3/PTPN2/BIRC3/PARP14/PLCG2/IRF7/VAV1/IRF1/APPL2/HLA-A/NFE2L2/CASP8/YTHDF3/AKIRIN2/WNT5A/DUSP10/SOCS1	47
BP	GO:0036293	response to decreased oxygen levels	47/1285	309/18903	1.65e-07	2.64e-06	1.74e-06	NR4A2/SOD2/CYBB/HMOX1/PLK3/PMAIP1/TREM2/CXCR4/FOS/SLC8A1/ATP1B1/TLR2/UCP2/JUND/TNF/ATM/IL1A/PTGS2/HK2/CPEB4/DDIT4/SLC11A2/SIRT1/TFRC/NDRG1/RYR1/APAF1/CXCL12/MYC/KCNMA1/CFLAR/NFE2L2/VHL/KCNMB1/CRYAB/ZFP36L1/EDN1/MMP2/MDM2/EGR1/ITPR2/CITED2/MTHFR/ADAM17/FOXO3/VEGFA/HIF1A	47
BP	GO:0022604	regulation of cell morphogenesis	47/1285	312/18903	2.21e-07	3.39e-06	2.24e-06	CSF1R/CCL3/ITGB2/ST6GAL1/LST1/PLEKHO1/CORO1A/CXCR4/PREX1/FMNL1/GNA13/FGD2/SEMA4D/FMNL2/RCC2/ARPC2/CYFIP1/RHOG/FGD4/PDPN/ARHGAP18/ACTR2/EPB41/ARHGAP15/FMNL3/HCK/BAIAP2/CDC42SE1/LIMS1/DAB2/ITSN2/PRPF40A/EPB41L3/RAC2/RAC1/MFSD2A/CDC42SE2/RHOH/S100A10/WNT5A/CCL2/ARAP1/NEDD9/RHOB/SPAG9/VEGFA/ANXA1	47
BP	GO:0031647	regulation of protein stability	47/1285	325/18903	7.39e-07	1.03e-05	6.77e-06	TYROBP/HSP90AA1/HSPD1/HSPA1A/HSP90AB1/HSPA1B/STK4/BAG3/IFI30/HSPA8/CTSH/ATP1B1/MFSD1/NPM1/CCNH/PRNP/PYCARD/RPL23/RPL11/TCP1/RNF149/USP36/IGF1/GNAQ/SNCA/CMTM6/RASSF2/GRN/PRKCD/SIRT1/SMAD7/CCT4/RPL5/GTPBP4/PIH1D1/MYLIP/PTGES3/DAZAP2/VHL/FBXW7/KRAS/PIK3R1/CRYAB/MDM2/PIM1/CDKN2AIP/USP4	47
BP	GO:0071214	cellular response to abiotic stimulus	47/1285	335/18903	1.76e-06	2.22e-05	1.47e-05	IL1B/BAG3/PTGER4/CDKN1A/IFI16/NLRP3/NFKB1/TLR4/NPM1/PTAFR/PYCARD/GRB2/RPL26/ATM/PTGS2/MAP3K2/TLR7/CASP1/PRKCD/HSPA5/RELB/SIRT1/PIEZO1/ERCC1/ARHGEF2/TNFRSF10B/TLR5/SIPA1/MYC/HAMP/IRF1/CASP8/DDX3X/TANK/OXSR1/PIK3R1/CRYAB/ZFP36L1/TLR3/MMP2/KCNJ2/MDM2/EGR1/TNFSF14/ZBTB1/NET1/RHOB	47
BP	GO:0104004	cellular response to environmental stimulus	47/1285	335/18903	1.76e-06	2.22e-05	1.47e-05	IL1B/BAG3/PTGER4/CDKN1A/IFI16/NLRP3/NFKB1/TLR4/NPM1/PTAFR/PYCARD/GRB2/RPL26/ATM/PTGS2/MAP3K2/TLR7/CASP1/PRKCD/HSPA5/RELB/SIRT1/PIEZO1/ERCC1/ARHGEF2/TNFRSF10B/TLR5/SIPA1/MYC/HAMP/IRF1/CASP8/DDX3X/TANK/OXSR1/PIK3R1/CRYAB/ZFP36L1/TLR3/MMP2/KCNJ2/MDM2/EGR1/TNFSF14/ZBTB1/NET1/RHOB	47
BP	GO:0010038	response to metal ion	47/1285	360/18903	1.26e-05	0.000129261	8.52e-05	MEF2A/SOD2/JUNB/CYBB/HMOX1/ALOX5AP/FOSB/LGMN/CEBPA/MBP/FOS/PRNP/CD14/P2RX7/JUN/JUND/SERPINF1/IL1A/PPIF/ADCY7/PTGS2/HOMER1/P2RX4/SNCA/NCF1/SLC11A2/HSPA5/TRPM2/TFRC/NDRG1/ERCC1/RYR1/KCNMA1/PLCG2/HAMP/NFE2L2/SLC30A1/CASP8/KCNMB1/PPP3CA/SYT6/EDN1/WNT5A/MT1X/SUCNR1/MEF2C/HIF1A	47
BP	GO:0006887	exocytosis	47/1285	369/18903	2.4e-05	0.000225859	0.000148848	CCL3/ITGB2/PLEK/CD84/HMOX1/FCGR3A/CORO1A/SCIN/NR4A3/LGALS9/STX4/LYN/SPI1/LAT2/PTAFR/P2RX7/NCKAP1L/SDCBP/CCR1/SNAP23/SYK/CD300A/TNFAIP2/PAK1/ABCC4/ITGAM/RAB11FIP1/VAMP8/BTK/SNCA/STX11/CCL5/CACNB4/BLOC1S6/HCK/RAB31/STXBP2/MICAL1/SYTL3/PIK3CG/GNAI2/RAC2/SYT6/GAB2/S100A10/MILR1/ANXA1	47
BP	GO:0060537	muscle tissue development	47/1285	422/18903	0.000583403	0.0034693	0.00228637	GPX1/RGS2/ID2/MEF2A/RUNX1/NR4A1/KDM6B/ARRB2/BTG2/FOS/SLC8A1/TGFB1/EGR2/IFRD1/DDX5/MAFF/SIK1/AKAP13/HDAC9/HOMER1/IGF1/CHD7/TGFBR1/ATF3/HNRNPU/SMAD7/ZFAND5/RYR1/GPCPD1/CFLAR/HAMP/ALPK3/SKI/KRAS/PPP3CA/PGM5/EDN1/EGR1/WNT5A/PIM1/CITED2/MAML1/PROX1/SAP30/HLX/MEF2C/VEGFA	47
BP	GO:0006417	regulation of translation	47/1285	486/18903	0.00933656	0.0347677	0.022913	PABPC1/ZFP36L2/RGS2/PPP1R15A/SERP1/BTG2/EIF4E/EIF5/RPS3/PPP1R15B/NPM1/ZFP36/RPL13A/PTAFR/MKNK1/RPL38/RPS14/KBTBD8/TNF/RPL26/EIF4A3/ZC3H12A/ETF1/RPL10/CYFIP1/RPS4X/CPEB4/RPS9/HNRNPU/MIR29A/RPS6KA1/CCL5/EIF1/MKNK2/RPS6KA3/ABCE1/RPL5/GSPT1/DCP2/SHMT1/DDX3X/YTHDF3/ZFP36L1/TCOF1/FOXO3/ENC1/QKI	47
BP	GO:0002262	myeloid cell homeostasis	46/1285	169/18903	1.62e-16	1.31e-14	8.61e-15	ID2/HCLS1/KLF2/HSPA1A/HSPA1B/HMOX1/RPS19/RPS24/IKZF1/MAFB/LYN/INPP5D/RPS6/SPI1/ZFP36/NCKAP1L/RPS14/JMJD6/TAL1/ALAS1/DNASE2/BTK/SLC11A2/INHBA/LIPA/MERTK/PDE4B/PTPN2/PTBP3/PKNOX1/SH2B3/HAMP/JAK2/HSPA9/KCNQ1/ZFP36L1/ARID4A/CITED2/CDK6/ADAM17/FOXO3/CSF1/BCL2L11/VEGFA/HIF1A/ANXA1	46
BP	GO:0002822	regulation of adaptive immune response based on somatic recombination of immune receptors built from immunoglobulin superfamily domains	46/1285	182/18903	3.51e-15	2.19e-13	1.44e-13	PTPRC/HLA-DRA/HLA-DRB1/HLA-E/C3/HSPD1/HAVCR2/JUNB/IL18/IL1B/FCGR1A/HLA-B/LILRB4/CLEC7A/TREM2/NFKBID/TNFAIP3/SLC11A1/NLRP3/P2RX7/TGFB1/WAS/NFKBIZ/CD55/NCKAP1L/TNF/TNFRSF1B/ZC3H12A/STX7/BTK/RIPK2/LILRB1/PTPN6/SMAD7/TFRC/ARID5A/TNFSF13B/JAK2/HLA-A/MALT1/IL4I1/PLA2G4A/ZBTB1/HLX/MEF2C/ANXA1	46
BP	GO:0050777	negative regulation of immune response	46/1285	190/18903	1.99e-14	1.12e-12	7.37e-13	PTPRC/HLA-DRB1/GPX1/HLA-E/SAMSN1/HAVCR2/CD84/HMOX1/RPS19/HLA-B/LILRB4/RHBDF2/TREM2/SERPINB9/ARRB2/TNFAIP3/LGALS9/VSIG4/FGL2/LYN/IFI16/INPP5D/SPI1/CD55/NCKAP1L/SAMHD1/SYK/CD300A/ZC3H12A/USP15/GRN/LILRB1/PTPN6/SMAD7/HCK/IRAK3/PTPN2/PARP14/PLK2/HLA-A/ARG2/YTHDF3/IL4I1/DUSP10/HLX/ANXA1	46
BP	GO:0022408	negative regulation of cell-cell adhesion	46/1285	202/18903	2.2e-13	1.04e-11	6.82e-12	CD74/LAPTM5/HLA-DRB1/HAVCR2/LILRB4/SOCS6/RUNX1/LGALS9/VSIG4/FGL2/CD86/MBP/SPI1/PELI1/PRNP/TGFB1/KLF4/NCKAP1L/CD300A/ZC3H12A/FXYD5/PRKCD/LILRB1/PTPN6/SMAD7/CEBPB/SWAP70/SPINT2/IL1RN/PTPN2/CXCL12/GTPBP4/SH2B3/JAK2/IRF1/WNK1/ARG2/IL4I1/SPN/AKNA/SOCS1/HLX/RUNX3/VEGFA/NRARP/ANXA1	46
BP	GO:0072593	reactive oxygen species metabolic process	46/1285	235/18903	5.95e-11	1.84e-09	1.21e-09	GPX1/TYROBP/ITGB2/SOD2/CYBB/CLEC7A/PMAIP1/CDKN1A/STK17A/PREX1/TLR4/PDGFB/P2RX7/TGFB1/GRB2/BCO2/TNF/SYK/ZC3H12A/ITGAM/HK2/NCF4/SNCA/TLR6/DDIT4/NCF1/PRKCD/GCH1/ALOX5/NCF2/CFLAR/PLCG2/VAV1/GNAI2/FOXO1/SLC25A33/NFE2L2/ARG2/RAC2/RAC1/CRYAB/EDN1/COQ7/FOXO3/PDK4/HIF1A	46
BP	GO:0001666	response to hypoxia	46/1285	296/18903	1.17e-07	1.91e-06	1.26e-06	NR4A2/SOD2/CYBB/HMOX1/PLK3/PMAIP1/TREM2/CXCR4/FOS/SLC8A1/ATP1B1/TLR2/UCP2/JUND/TNF/ATM/IL1A/PTGS2/HK2/DDIT4/SLC11A2/SIRT1/TFRC/NDRG1/RYR1/APAF1/CXCL12/MYC/KCNMA1/CFLAR/NFE2L2/VHL/KCNMB1/CRYAB/ZFP36L1/EDN1/MMP2/MDM2/EGR1/ITPR2/CITED2/MTHFR/ADAM17/FOXO3/VEGFA/HIF1A	46
BP	GO:0034655	nucleobase-containing compound catabolic process	46/1285	428/18903	0.0013949	0.00724049	0.0047717	RNASET2/PABPC1/ZFP36L2/HSPA1A/HSPA1B/TYMP/SLC11A1/BTG2/PABPC4/NPM1/ZFP36/SAMHD1/ENTPD1/EIF4A3/NUDT3/DDX5/PNP/ATM/TNFRSF1B/ZC3H12A/ETF1/NAF1/DNASE2/RNASE6/HNRNPC/HNRNPU/ZC3HAV1/PRKCD/UPP1/DEDD2/MGAT1/ERN1/PDE4B/APAF1/GSPT1/DCP2/RBM38/YTHDF3/FHIT/ZFP36L1/AMPD3/PRKCA/PDE7A/MBD4/KCNQ1OT1/ISG20	46
BP	GO:0006869	lipid transport	46/1285	433/18903	0.00176251	0.00875669	0.00577091	SPP1/NFKBIA/SLCO2B1/IL1B/APOC1/TREM2/MSR1/NFKB1/IRS2/P2RX7/PLIN2/CHKA/ATP8B4/NPC2/SOAT1/SYK/PSAP/IL1A/ACSL1/PTGS2/ABCC4/CLN8/P2RX4/UGCG/SPNS2/PRKCD/INHBA/SIRT1/OSBPL11/APOE/DBI/DAB2/APOC2/KCNQ1/LDLR/PLA2G4A/OSBPL3/MFSD2A/EDN1/ABCG1/PNPLA8/VMP1/ABCG2/PIP4K2A/ABCA1/ANXA1	46
BP	GO:0048732	gland development	46/1285	441/18903	0.00252728	0.0119326	0.00786391	GPX1/CSF1R/ID2/SOD2/HMOX1/TNFAIP3/MAFB/XBP1/CEBPA/NFKB1/IRS2/TGFB1/JUN/SLC7A5/RPLP0/UCP2/TNF/SERPINF1/ATM/PSAP/HK2/FKBP4/TGFBR1/RPS6KA1/CACNB4/CEBPB/CFLAR/HAMP/JAK2/SALL1/EZH2/FBXW7/POLB/PLAG1/EDN1/MMP2/WNT5A/ZBTB1/CITED2/PROX1/CSF1/BCL2L11/HLX/VEGFA/HIF1A/ANXA1	46
BP	GO:0045861	negative regulation of proteolysis	45/1285	352/18903	3.23e-05	0.000293504	0.000193428	GPX1/C3/CTSB/SORL1/BIN1/HSP90AB1/DNAJB6/NR4A1/SERPINB9/ARRB2/CTSZ/IFI16/PLAUR/PRNP/SERPINE1/KLF4/RPL23/RPL11/NAIP/SDCBP/TNF/SERPINF1/PTGS2/SERPINA1/CLN8/ARL6IP1/SNCA/RPS6KA1/RPS6KA3/CARD8/SPINT2/SIAH2/CST3/BIRC3/RPL5/MICAL1/PIH1D1/GAS6/DDX3X/FHIT/PICALM/CRYAB/TNFSF14/TNFAIP8/VEGFA	45
BP	GO:0042176	regulation of protein catabolic process	45/1285	361/18903	5.99e-05	0.000504446	0.000332445	GPX1/SORL1/HSP90AA1/HSPA1A/IL1B/HSP90AB1/HSPA1B/EEF1A1/ZFAND2A/PLK3/TREM2/TNFAIP3/CEBPA/TRIB1/HERPUD1/RPL11/SDCBP/UBB/TNF/OAZ1/TNFRSF1B/ODC1/SNCA/AZIN1/SMAD7/APOE/CST3/IRAK3/CSNK1D/MYLIP/DAB2/HAMP/SNX9/PLK2/FOXO1/NFE2L2/RNF144B/FBXW7/LDLR/FHIT/WDR91/ARIH1/MDM2/WNT5A/RNF19A	45
BP	GO:2000146	negative regulation of cell motility	45/1285	383/18903	0.00023681	0.001604	0.00105708	CD74/AIF1/DUSP1/ADORA3/HMOX1/SRGAP2/DNAJA4/CX3CR1/NAV3/PTGER4/LDLRAD4/SERPINE1/GNA13/TGFB1/KLF4/TRIB1/WAS/TNF/SERPINF1/CD300A/VASH1/PADI2/ARHGAP4/SRGAP1/RIN3/RAP2B/SRGAP3/MIR29A/SMAD7/PTPRJ/APOE/SPINT2/CXCL12/GTPBP4/NFE2L2/RAC1/CCL2/ARID4A/DUSP10/CITED2/FOXO3/SAP30/NEDD9/RHOB/MEF2C	45
BP	GO:0042116	macrophage activation	44/1285	109/18903	1.83e-23	3.04e-21	2e-21	CD74/PTPRC/TYROBP/CCL3/C1QA/AIF1/HSPD1/ITGB2/HAVCR2/CTSC/CD84/FCGR3A/CX3CR1/IFNGR1/TREM2/SLC11A1/VSIG4/CEBPA/C5AR1/TLR4/MIR142/TLR2/JUN/JUND/TNF/SYK/ATM/ZC3H12A/JMJD6/ITGAM/TLR1/SNCA/TLR6/GRN/IFNGR2/TMEM106A/PLCG2/HAMP/JAK2/LDLR/PLA2G4A/TLR3/WNT5A/SUCNR1	44
BP	GO:0010632	regulation of epithelial cell migration	44/1285	292/18903	5.29e-07	7.45e-06	4.91e-06	HMOX1/DNAJA4/CTSH/LGMN/IRS2/RIN2/PDGFB/TGFB1/KLF4/JUN/MAP4K4/MAP2K3/TNF/SERPINF1/VASH1/ZC3H12A/PTGS2/HDAC9/TMSB4X/P2RX4/MIR29A/GRN/GLUL/SIRT1/APOE/PLCG2/PIK3CG/PLK2/SH3BP1/NFE2L2/FBXW7/RAC1/EDN1/WNT5A/PRKCA/HBEGF/DUSP10/PROX1/ADAM17/RHOB/MEF2C/VEGFA/HIF1A/ANXA1	44
BP	GO:0044403	biological process involved in symbiotic interaction	44/1285	307/18903	2.11e-06	2.63e-05	1.73e-05	CD74/HLA-DRB1/GPX1/CSF1R/CCL3/CTSB/CCL4/HSPD1/HSPA1A/HSP90AB1/HSPA1B/EEF1A1/CX3CR1/CXCR4/HSPA8/SELPLG/LGALS9/CD86/CH25H/JUN/CD55/CHD1/SLC1A5/ICAM1/TCP1/RPSA/ZC3H12A/CHMP1B/TRIM38/VAMP8/VPS37B/CCL5/TFRC/APOE/ITGA5/JAK2/TRIM22/GAS6/LDLR/UVRAG/TREM1/RNASEK/SLC3A2/SAP30	44
BP	GO:0019058	viral life cycle	44/1285	319/18903	5.84e-06	6.52e-05	4.3e-05	CD74/HLA-DRB1/PABPC1/CTSB/HSPA1A/HSP90AB1/HSPA1B/EEF1A1/CXCR4/HSPA8/SELPLG/LGALS9/IFI16/CD86/CH25H/CD55/SLC1A5/ICAM1/TNF/RPSA/ZC3H12A/CHMP1B/TRIM38/VAMP8/VPS37B/ZC3HAV1/CCL5/TFRC/APOE/ITGA5/TRIM22/GAS6/OASL/DDX3X/LDLR/UVRAG/USP6NL/RAB1A/RNASEK/CCL2/SLC3A2/PROX1/KPNA2/ISG20	44
BP	GO:0006913	nucleocytoplasmic transport	44/1285	329/18903	1.29e-05	0.000131759	8.68e-05	HSP90AA1/HCLS1/NFKBIA/IL1B/HSP90AB1/STK4/BAG3/CDKN1A/NPM1/TGFB1/RPL23/EGR2/EIF4A3/SYK/HHEX/ZC3H12A/PTGS2/AKAP13/PRKCD/MX2/RANBP2/ABCE1/JAK2/APPL2/GAS6/MALT1/NUP62/HSPA9/KPNA4/PPP3CA/AKIRIN2/PIK3R1/DDX39A/RPS15/IPO7/YTHDC1/SQSTM1/POM121/FAM53B/FAM53C/FRAT1/ENY2/KPNA2/HNRNPA2B1	44
BP	GO:0051169	nuclear transport	44/1285	329/18903	1.29e-05	0.000131759	8.68e-05	HSP90AA1/HCLS1/NFKBIA/IL1B/HSP90AB1/STK4/BAG3/CDKN1A/NPM1/TGFB1/RPL23/EGR2/EIF4A3/SYK/HHEX/ZC3H12A/PTGS2/AKAP13/PRKCD/MX2/RANBP2/ABCE1/JAK2/APPL2/GAS6/MALT1/NUP62/HSPA9/KPNA4/PPP3CA/AKIRIN2/PIK3R1/DDX39A/RPS15/IPO7/YTHDC1/SQSTM1/POM121/FAM53B/FAM53C/FRAT1/ENY2/KPNA2/HNRNPA2B1	44
BP	GO:1901342	regulation of vasculature development	44/1285	355/18903	8.23e-05	0.000648188	0.000427175	C3/KLF2/CYBB/IL1B/HMOX1/ITGAX/C3AR1/CX3CR1/RUNX1/CXCR4/TNFAIP3/CTSH/XBP1/C5AR1/SERPINE1/NINJ1/KLF4/PDE3B/TNF/SERPINF1/VASH1/IL1A/HHEX/ZC3H12A/HK2/MIR29A/GRN/GLUL/STAB1/SIRT1/ALOX5/ITGA5/ADAM10/TMIGD2/PLK2/NFE2L2/TLR3/WNT5A/PRKCA/RHOB/FLT1/VEGFA/SPRY2/HIF1A	44
BP	GO:0046631	alpha-beta T cell activation	43/1285	174/18903	6.54e-14	3.33e-12	2.19e-12	PTPRC/HLA-DRA/HLA-DRB1/CD83/HSPH1/HLA-E/JUNB/IL18/GPR183/LILRB4/RUNX1/NFKBID/PTGER4/LGALS9/CD86/NLRP3/DOCK2/NFKBIZ/CD55/NCKAP1L/SYK/PNP/CD300A/ZC3H12A/IL6R/PRDM1/RASAL3/RELB/RIPK2/LILRB1/SMAD7/JAK2/IRF1/HLA-A/MALT1/EBI3/ARG2/CARD11/SPN/SOCS1/HLX/RUNX3/ANXA1	43
BP	GO:0051402	neuron apoptotic process	43/1285	255/18903	2.78e-08	5.1e-07	3.36e-07	GPX1/TYROBP/CCL3/NR4A2/SOD2/HSP90AB1/HMOX1/CX3CR1/CORO1A/MCL1/TREM2/ARRB2/BTG2/LGMN/PRNP/IL6ST/JUN/NAIP/TNF/ATM/ITGAM/CLN8/CPEB4/SNCA/GRN/HSPA5/GRID2/APOE/CEBPB/APAF1/DDIT3/JAK2/NLRP1/FBXW7/KRAS/POLB/CCL2/FOXO3/BID/MAP3K11/BCL2L11/MEF2C/HIF1A	43
BP	GO:0051258	protein polymerization	43/1285	281/18903	4.63e-07	6.67e-06	4.39e-06	HSP90AA1/AIF1/HCLS1/HSPA1A/BIN1/HSPA1B/COTL1/CORO1A/NAV3/SCIN/PREX1/RPS3/PYCARD/WAS/GRB2/NCKAP1L/CAPG/PDE4DIP/PAK1/ARPC3/TMSB10/ARPC2/CYFIP1/ARPC1B/TMSB4X/FKBP4/SNCA/ARHGAP18/PRKCD/RANBP9/HCK/BAIAP2/FMN1/DIAPH2/CSNK1D/FCHSD2/JAK2/SNX9/CORO7/RAC1/NDEL1/CAPZA1/SSH1	43
BP	GO:0071375	cellular response to peptide hormone stimulus	43/1285	306/18903	4.6e-06	5.24e-05	3.45e-05	SORL1/NR4A2/PTPRE/IL1B/NR4A1/NR4A3/XBP1/LYN/NFKB1/FOS/IRS2/PDE3B/LPIN2/GRB2/UCP2/SYAP1/SOCS3/CYFIP1/HDAC9/INSIG1/PRKCD/INHBA/ATP2B1/SIRT1/SNX5/RAB31/BAIAP2/PTPN2/CFLAR/JAK2/GNAI2/FOXO1/APPL2/SLC25A33/NFE2L2/PIK3R1/TBC1D4/ZFP36L1/NDEL1/EDN1/SOCS1/PDK4/PIP4K2A	43
BP	GO:1904951	positive regulation of establishment of protein localization	43/1285	310/18903	6.43e-06	7.07e-05	4.66e-05	HLA-DRB1/SORL1/HSP90AA1/HCLS1/ITGB2/IL1B/HSP90AB1/BAG3/PLK3/TREM2/SERP1/STX4/FRMD4A/IRS2/TLR4/TLR2/PRNP/ATP2C1/P2RX7/TGFB1/TCP1/TNF/IL1A/OAZ1/UBE2D3/ZC3H12A/PTGS2/ITGAM/USP36/IGF1/PRKCD/GLUL/TRPM2/CCT4/JAK2/GAS6/FBXW7/CD33/RAC2/PIK3R1/ABCG1/HSPA1L/HIF1A	43
BP	GO:0046394	carboxylic acid biosynthetic process	43/1285	326/18903	2.27e-05	0.000214964	0.000141668	CD74/IL1B/ALOX5AP/APOC1/TBXAS1/LTC4S/XBP1/DHRS9/PYCARD/GLS/GATM/NAIP/SYK/PRKAG2/DAGLB/PTGS2/HPGDS/AKR1A1/INSIG1/CASP1/MTHFD1L/GLUL/SIRT1/ALOX5/BCAT1/MLXIPL/ACSM5/PTGES3/PTGS1/SHMT1/APOC2/PLA2G4A/GSTM2/OSBPL3/EDN1/ABHD3/SCD/MTHFR/PROX1/PDK4/PNPLA8/QKI/ANXA1	43
BP	GO:0016053	organic acid biosynthetic process	43/1285	328/18903	2.63e-05	0.000243488	0.000160466	CD74/IL1B/ALOX5AP/APOC1/TBXAS1/LTC4S/XBP1/DHRS9/PYCARD/GLS/GATM/NAIP/SYK/PRKAG2/DAGLB/PTGS2/HPGDS/AKR1A1/INSIG1/CASP1/MTHFD1L/GLUL/SIRT1/ALOX5/BCAT1/MLXIPL/ACSM5/PTGES3/PTGS1/SHMT1/APOC2/PLA2G4A/GSTM2/OSBPL3/EDN1/ABHD3/SCD/MTHFR/PROX1/PDK4/PNPLA8/QKI/ANXA1	43
BP	GO:0018209	peptidyl-serine modification	43/1285	332/18903	3.52e-05	0.000314585	0.000207321	HSP90AA1/SGK1/HCLS1/HSP90AB1/STK4/ARRB2/CLK1/PDGFB/TGFB1/MKNK1/TNF/OSM/SYK/ATM/PAK1/PTGS2/SNCA/FNIP2/TGFBR1/DDIT4/RASSF2/GALNT2/PRKCD/RPS6KA1/RIPK2/MKNK2/SMAD7/RPS6KA3/TFRC/MLXIPL/ERN1/CSNK1D/MAST3/PLK2/WNK1/GAS6/STK38L/WNT5A/PRKCA/PRKCH/TOP1/VEGFA/SPRY2	43
BP	GO:0048545	response to steroid hormone	43/1285	339/18903	5.77e-05	0.000490872	0.000323499	ZFP36L2/SPP1/SGK1/AIF1/HSPA1A/CYBB/HSPA1B/DNAJA1/HSPA8/NR4A3/FOSB/EIF4E/MBP/FOS/ZFP36/TLR2/PTAFR/TGFB1/ATP1A1/YWHAH/TNF/SERPINF1/DDX5/PAK1/PADI2/PTGS2/RPL27/FKBP4/DDIT4/HNRNPU/ATP2B1/SIRT1/IL1RN/CFLAR/PTGES3/DAB2/JAK2/ZFP36L1/EDN1/FOXO3/BCL2L11/IDH1/ANXA1	43
BP	GO:0045765	regulation of angiogenesis	43/1285	349/18903	0.000112918	0.000848055	0.000558893	C3/KLF2/CYBB/IL1B/HMOX1/ITGAX/C3AR1/CX3CR1/RUNX1/CXCR4/TNFAIP3/CTSH/XBP1/C5AR1/SERPINE1/NINJ1/KLF4/PDE3B/TNF/SERPINF1/VASH1/IL1A/HHEX/ZC3H12A/HK2/MIR29A/GRN/GLUL/STAB1/SIRT1/ALOX5/ITGA5/TMIGD2/PLK2/NFE2L2/TLR3/WNT5A/PRKCA/RHOB/FLT1/VEGFA/SPRY2/HIF1A	43
BP	GO:0030336	negative regulation of cell migration	43/1285	368/18903	0.000362701	0.00231601	0.00152632	CD74/AIF1/DUSP1/ADORA3/HMOX1/SRGAP2/DNAJA4/CX3CR1/NAV3/PTGER4/LDLRAD4/SERPINE1/GNA13/TGFB1/KLF4/TRIB1/TNF/SERPINF1/CD300A/VASH1/PADI2/ARHGAP4/SRGAP1/RIN3/RAP2B/SRGAP3/MIR29A/SMAD7/PTPRJ/APOE/CXCL12/GTPBP4/NFE2L2/RAC1/CCL2/ARID4A/DUSP10/CITED2/FOXO3/SAP30/NEDD9/RHOB/MEF2C	43
BP	GO:1904062	regulation of cation transmembrane transport	43/1285	394/18903	0.00145993	0.00752418	0.00495865	RGS2/CTSS/BIN1/CORO1A/TREM2/LYN/SLC8A1/ATP1B1/PRNP/ADRB2/P2RX7/YWHAH/NDUFA4/PPIF/FXYD5/GLRX/HOMER1/SLC43A2/TMSB4X/CHD7/P2RX4/SNCA/IFNGR2/CACNB4/PTPN6/SCN1B/PDE4B/PLCG2/HAMP/PIK3CG/WNK1/SLC30A1/KCNQ1/KCNMB1/OXSR1/PPP3CA/GSTM2/EDN1/KCNJ2/CCL2/SLC31A2/VMP1/MEF2C	43
BP	GO:0046486	glycerolipid metabolic process	43/1285	399/18903	0.00186204	0.00922742	0.00608114	GPX1/CSF1R/C3/SORL1/LPCAT2/PLEK/APOC1/SOCS6/INPP5D/PDGFB/LPIN2/CHKA/ATM/SIK1/ACSL1/PLCB2/DAGLB/SOCS3/INSIG1/GK/SIRT1/ETNK1/APOE/GPCPD1/PLA2G15/DBI/PLCG2/PIK3CG/FBXW7/APOC2/LDLR/UVRAG/PI4K2A/MTMR10/PLA2G4A/PIK3R1/MFSD2A/ABHD3/TTC7A/SOCS1/DGKA/PNPLA8/PIP4K2A	43
BP	GO:0050921	positive regulation of chemotaxis	42/1285	144/18903	2.24e-16	1.73e-14	1.14e-14	CD74/CSF1R/CCL3/AIF1/CCL4/C3AR1/CX3CR1/TREM2/CXCR4/P2RY12/LGALS9/STX4/LGMN/C5AR1/SPI1/PDGFB/SERPINE1/TGFB1/NCKAP1L/CCR1/IL6R/TMSB4X/P2RX4/CCL5/SWAP70/ADAM10/CXCL12/IL16/WNK1/GPSM3/GAS6/OXSR1/RAC2/RAC1/EDN1/WNT5A/TNFSF14/ADAM17/NEDD9/CSF1/SUCNR1/VEGFA	42
BP	GO:0051250	negative regulation of lymphocyte activation	42/1285	166/18903	5.36e-14	2.77e-12	1.83e-12	CD74/LAPTM5/HLA-DRB1/TYROBP/ID2/SAMSN1/HAVCR2/LST1/LILRB4/SOCS6/RUNX1/TNFAIP3/LGALS9/VSIG4/FGL2/LYN/CD86/INPP5D/PELI1/PRNP/NCKAP1L/RASSF5/ATM/CD300A/ZC3H12A/BTK/INHBA/LILRB1/PTPN6/SMAD7/MERTK/CEBPB/PTPN2/IRF1/ARG2/IL4I1/SPN/SOCS1/HLX/RUNX3/NRARP/ANXA1	42
BP	GO:0043405	regulation of MAP kinase activity	42/1285	186/18903	3.27e-12	1.28e-10	8.42e-11	PTPRC/SORL1/RGS2/DUSP1/IL1B/DNAJA1/LYN/RPS3/TLR4/PDGFB/P2RX7/TGFB1/TRIB1/FGD2/TNF/SYK/CD300A/TAOK3/PAK1/AKAP13/TLR6/PRKCD/PTPN6/PTPRJ/APOE/ERN1/IRAK3/MAP3K5/SH2B3/PIK3CG/EZH2/PIK3R5/NUP62/EDN1/WNT5A/DUSP10/PDCD4/MAP3K11/FLT1/MEF2C/VEGFA/SPRY2	42
BP	GO:1903320	regulation of protein modification by small protein conjugation or removal	42/1285	252/18903	5.66e-08	9.89e-07	6.52e-07	LAPTM5/HSP90AA1/HSPA1A/RPS2/HSP90AB1/HSPA1B/DNAJA1/RPS20/RPL37/ARRB2/TNFAIP3/IVNS1ABP/RPS3/PELI1/NPM1/HERPUD1/RPL23/RPL11/UBB/RASSF5/ZC3H12A/ARRDC3/TGFBR1/HSPA5/RIPK2/SMAD7/SIAH2/BIRC3/RPL5/GTPBP4/GNL3/MALT1/DDX3X/FBXW7/TANK/RPS15/EGR1/SQSTM1/TBC1D7/USP4/SPRY2/HIF1A	42
BP	GO:0031668	cellular response to extracellular stimulus	42/1285	262/18903	1.73e-07	2.75e-06	1.81e-06	PTPRC/AIF1/NR4A2/HMOX1/CD68/PMAIP1/HSPA8/CDKN1A/KLF10/XBP1/LYN/IFI16/FOS/FOLR2/P2RX7/PLIN2/GABARAPL1/SLC7A5/UCP2/PRKAG2/SIK1/ZC3H12A/CPEB4/ATF3/HSPA5/GLUL/UPP1/ATP2B1/SIRT1/MIOS/MAP3K5/SIPA1/FOXO1/GAS6/NFE2L2/MAP1LC3B/DSC2/MFSD2A/ITFG2/PIM1/FOXO3/PDK4	42
BP	GO:0043542	endothelial cell migration	42/1285	281/18903	1.19e-06	1.55e-05	1.02e-05	GPX1/HMOX1/DNAJA4/EGR3/NR4A1/LGMN/RIN2/PDGFB/TGFB1/KLF4/MAP2K3/TNF/SERPINF1/VASH1/ZC3H12A/PTGS2/HDAC9/TMSB4X/P2RX4/TGFBR1/MIR29A/GRN/GLUL/SIRT1/APOE/LPXN/PIK3CG/PLK2/SH3BP1/NFE2L2/FBXW7/RAC1/EDN1/WNT5A/PRKCA/PROX1/ADAM17/RHOB/MEF2C/VEGFA/HIF1A/ANXA1	42
BP	GO:0051607	defense response to virus	42/1285	304/18903	9.06e-06	9.75e-05	6.42e-05	PTPRC/HSP90AA1/IL1B/ITGAX/DDX21/PMAIP1/HTRA1/TNFAIP3/FGL2/IFI16/TLR2/PYCARD/SAMHD1/ZC3H12A/TRIM38/USP15/RNASE6/VAMP8/TLR7/DDIT4/ZC3HAV1/CASP1/IFNGR2/LILRB1/RNF125/MX2/CARD8/MLKL/BIRC3/IRF5/IRF7/TRIM22/IRF1/LYST/NLRP1/OASL/TANK/DDX60L/UNC93B1/TLR3/IFIT2/ISG20	42
BP	GO:0140546	defense response to symbiont	42/1285	305/18903	9.84e-06	0.00010483	6.91e-05	PTPRC/HSP90AA1/IL1B/ITGAX/DDX21/PMAIP1/HTRA1/TNFAIP3/FGL2/IFI16/TLR2/PYCARD/SAMHD1/ZC3H12A/TRIM38/USP15/RNASE6/VAMP8/TLR7/DDIT4/ZC3HAV1/CASP1/IFNGR2/LILRB1/RNF125/MX2/CARD8/MLKL/BIRC3/IRF5/IRF7/TRIM22/IRF1/LYST/NLRP1/OASL/TANK/DDX60L/UNC93B1/TLR3/IFIT2/ISG20	42
BP	GO:0042254	ribosome biogenesis	42/1285	310/18903	1.47e-05	0.000148412	9.78e-05	RPS19/RPS24/DDX21/RPS6/NPM1/RPL38/RPS14/RPL11/RPS21/RPLP0/RPL26/EIF4A3/RPS8/RPSA/RPL27/ISG20L2/RPL10/NAF1/USP36/CHD7/RPS16/GLUL/RPS28/RPL14/ABCE1/RPL5/GTPBP4/PIH1D1/NOP58/GNL2/DDX3X/RRP12/RPS27/RPS15/RPL24/UTP6/RPL10A/RPS5/DDX27/RPS25/NOP56/ISG20	42
BP	GO:0018105	peptidyl-serine phosphorylation	42/1285	313/18903	1.86e-05	0.000180153	0.000118726	HSP90AA1/SGK1/HCLS1/HSP90AB1/STK4/ARRB2/CLK1/PDGFB/TGFB1/MKNK1/TNF/OSM/SYK/ATM/PAK1/PTGS2/SNCA/FNIP2/TGFBR1/DDIT4/RASSF2/PRKCD/RPS6KA1/RIPK2/MKNK2/SMAD7/RPS6KA3/TFRC/MLXIPL/ERN1/CSNK1D/MAST3/PLK2/WNK1/GAS6/STK38L/WNT5A/PRKCA/PRKCH/TOP1/VEGFA/SPRY2	42
BP	GO:0140694	non-membrane-bounded organelle assembly	42/1285	386/18903	0.00174373	0.00870064	0.00573398	MEF2A/HSPA1A/LCP1/HSPA1B/RPS19/FSCN1/BIN2/RPS3/RPS23/NPM1/RPL38/RPS14/RPL11/RPLP0/TNF/RPSA/AKAP13/CHMP1B/RPL10/HNRNPU/C9orf72/RPS28/HCK/RPL5/CSNK1D/CFLAR/PRRC2C/PLK2/DAZAP2/NUP62/DDX3X/YTHDF3/RPS27/PGM5/RPS15/RPL24/RNF213/EDN1/PROX1/RPS5/SQLE/RTTN	42
BP	GO:0002700	regulation of production of molecular mediator of immune response	41/1285	187/18903	1.61e-11	5.69e-10	3.75e-10	CD74/PTPRC/LAPTM5/HLA-E/IL18/IL1B/HMOX1/LILRB4/CLEC7A/DDX21/NR4A3/STX4/XBP1/LITAF/CD86/NLRP3/TLR4/P2RX7/TGFB1/PYCARD/CD55/SLC7A5/TNF/SYK/TNFRSF1B/BTK/TLR7/RIPK2/LILRB1/SIRT1/SMAD7/TFRC/ARID5A/IRAK3/PLCG2/HLA-A/MALT1/SCIMP/TLR3/UBE2J1/WNT5A	41
BP	GO:0031334	positive regulation of protein-containing complex assembly	41/1285	192/18903	3.89e-11	1.25e-09	8.26e-10	HSP90AA1/HSPA1A/PLEK/BIN1/LCP1/HSPA1B/CLEC7A/NAV3/P2RY12/FSCN1/RPS3/TLR4/TGFB1/PYCARD/GRB2/NCKAP1L/PDE4DIP/TNF/SYK/ATM/PAK1/ARPC2/TAL1/SNCA/FNIP2/TLR6/PIEZO1/HCK/TFRC/BAIAP2/FMN1/FCHSD2/PIH1D1/PLCG2/SNX9/DDX3X/RAC1/BID/BCL2L11/VEGFA/ABCA1	41
BP	GO:0071902	positive regulation of protein serine/threonine kinase activity	41/1285	229/18903	1.01e-08	2.03e-07	1.33e-07	PTPRC/CSF1R/IL1B/HSP90AB1/STK4/RPS3/TLR4/PDGFB/ADRB2/P2RX7/TGFB1/FGD2/TNF/SYK/CKS2/TAOK3/ACSL1/PAK1/SYAP1/AKAP13/SNCA/TLR6/SIRT1/ERN1/MAP3K5/PIH1D1/PIK3CG/EZH2/PIK3R5/DAZAP2/DDX3X/EDN1/DBF4/WNT5A/PROX1/ADAM17/MAP3K11/FLT1/MEF2C/VEGFA/SPRY2	41
BP	GO:0033673	negative regulation of kinase activity	41/1285	240/18903	4e-08	7.12e-07	4.69e-07	PTPRC/SORL1/RGS2/DUSP1/IL1B/DNAJA1/GADD45B/LILRB4/TNFAIP3/CDKN1A/CHORDC1/LYN/CEBPA/IRS2/SLC8A1/NPM1/PYCARD/TRIB1/PRKAG2/CD300A/HHEX/MIDN/GNAQ/SNCA/HNRNPU/PRKCD/SIRT1/PTPN6/PTPRJ/APOE/IRAK3/PTPN2/PIK3IP1/SH2B3/NUP62/IPO7/DEPTOR/DUSP10/PDCD4/PIP4K2A/SPRY2	41
BP	GO:0031098	stress-activated protein kinase signaling cascade	41/1285	246/18903	8.12e-08	1.35e-06	8.92e-07	DUSP1/IL1B/DNAJA1/GADD45B/TREM2/PTGER4/LGALS9/LYN/NFKB1/SPI1/TLR4/ZFP36/PYCARD/TRIB1/MAP4K4/NAIP/SDCBP/MAP2K3/TNF/SIRPA/IL1A/CYLD/TAOK3/ZC3H12A/TLR7/RASSF2/NCF1/RIPK2/MAP3K5/MYC/FOXO1/SCIMP/CRYAB/ZFP36L1/TLR3/WNT5A/DUSP10/PDCD4/MAP3K11/GADD45G/VEGFA	41
BP	GO:0050851	antigen receptor-mediated signaling pathway	41/1285	252/18903	1.6e-07	2.57e-06	1.69e-06	PTPRC/LAPTM5/HLA-DRB1/HLA-DPB1/HLA-DQB1/LILRB4/ELF1/NFKBID/LYN/RPS3/INPP5D/LAT2/PRNP/KLHL6/NFKBIZ/NCKAP1L/SYK/BLNK/CD300A/ZC3H12A/LCP2/BTK/RIPK2/SLC39A10/CACNB4/THEMIS2/PTPN6/PTPRJ/ICOSLG/PDE4B/PTPN2/LPXN/PLCG2/WNK1/HLA-A/MALT1/NFATC2/CARD11/PLCL2/PRKCH/MEF2C	41
BP	GO:0006898	receptor-mediated endocytosis	41/1285	257/18903	2.76e-07	4.1e-06	2.7e-06	C3/SORL1/ITGB2/FCER1G/FCGR1A/LILRB4/APOC1/CXCL16/BMP2K/ARRB2/MSR1/ADRB2/CD14/SERPINE1/GRB2/SDCBP/SYK/ITGAM/RIN3/SNCA/LILRB1/STAB1/TFRC/RAB31/APOE/ARHGAP27/RAMP1/FCHSD2/DAB2/PLCG2/ITSN2/SNX9/LYVE1/GAK/APOC2/LDLR/PICALM/RAC1/CLEC9A/RNASEK/VEGFA	41
BP	GO:0071559	response to transforming growth factor beta	41/1285	277/18903	2.04e-06	2.54e-05	1.68e-05	ZFP36L2/SKIL/HSPA1A/HSP90AB1/CX3CR1/HTRA1/ARRB2/FOS/SPI1/LDLRAD4/TGFB1/JUN/SDCBP/USP15/CHST11/TGFBR1/HSPA5/SIRT1/SMAD7/APAF1/CFLAR/LPXN/NFATC1/LIMS1/DAB2/APPL2/ADAMTSL2/SMURF2/SKI/ZFP36L1/EDN1/WNT5A/ARID4A/CITED2/ADAM17/ZEB2/SAP30/GCNT2/RUNX3/MEF2C/SPRY2	41
BP	GO:0051222	positive regulation of protein transport	41/1285	294/18903	9.18e-06	9.8e-05	6.46e-05	HLA-DRB1/SORL1/HSP90AA1/HCLS1/ITGB2/IL1B/HSP90AB1/BAG3/PLK3/TREM2/SERP1/STX4/FRMD4A/IRS2/TLR4/TLR2/PRNP/ATP2C1/P2RX7/TGFB1/TNF/IL1A/OAZ1/UBE2D3/ZC3H12A/PTGS2/ITGAM/USP36/IGF1/PRKCD/GLUL/TRPM2/JAK2/GAS6/FBXW7/CD33/RAC2/PIK3R1/ABCG1/HSPA1L/HIF1A	41
BP	GO:0034504	protein localization to nucleus	41/1285	306/18903	2.41e-05	0.000226705	0.000149405	HSP90AA1/HCLS1/NFKBIA/HSP90AB1/DNAJB6/STK4/LILRB4/BAG3/CDKN1A/NPM1/TGFB1/RPL23/RPL11/TCP1/RASSF5/SYK/HHEX/GBP2/ZC3H12A/PTGS2/HNRNPU/PRKCD/GLUL/CACNB4/TFRC/RANBP2/CCT4/JAK2/APPL2/NUP62/KPNA4/PPP3CA/AKIRIN2/PIK3R1/IPO7/MDM2/SQSTM1/POM121/FAM53B/FAM53C/KPNA2	41
BP	GO:0010720	positive regulation of cell development	41/1285	307/18903	2.6e-05	0.000242506	0.000159819	TYROBP/SKIL/ID2/IL1B/BIN1/CLEC7A/CX3CR1/CXCR4/PREX1/LYN/MIR142/TLR2/IL6ST/TGFB1/TRIB1/SEMA4D/SLC7A5/EGR2/TNF/SERPINF1/TIAM1/TNFRSF1B/ARPC2/CYFIP1/ACTR2/SMAD7/BAIAP2/CXCL12/LIMS1/DAB2/KRAS/RAC1/NDEL1/PLAG1/S100A10/GOLGA4/PRKCH/NEDD9/RHEB/VEGFA/HIF1A	41
BP	GO:0010506	regulation of autophagy	41/1285	344/18903	0.000326606	0.00210641	0.00138818	EEF1A1/HMOX1/BAG3/PLK3/IL10RA/MCL1/TREM2/SPTLC2/IFI16/ADRB2/PYCARD/ABL2/ATP6V1B2/SLC7A5/ATM/PSAP/ZC3H12A/TRIM38/TAB2/USP36/SNCA/RIPK2/C9orf72/ATP6V0A1/SIRT1/SNX5/ERN1/DDIT3/FEZ2/TRIM22/ATF6/PLK2/FOXO1/FBXW7/UVRAG/FOXO3/RHEB/BCL2L11/ATP6V0B/PIP4K2A/HIF1A	41
BP	GO:0009306	protein secretion	41/1285	359/18903	0.000777268	0.0044664	0.00294349	HLA-DRB1/PLEK/IL1B/RHBDF2/TREM2/SERP1/STX4/FRMD4A/IRS2/TLR4/TLR2/P2RX7/TGFB1/AP1B1/UCP2/TNF/IL1A/MIDN/RAB11FIP1/IGF1/CCL5/GLUL/ALOX5/BLOC1S6/TRPM2/APOE/PIM3/IL1RN/JAK2/FOXO1/ICA1/CD33/PPP3CA/SLC8B1/ABCG1/SLC16A1/KLF7/SUCNR1/HIF1A/ABCA1/ANXA1	41
BP	GO:0035592	establishment of protein localization to extracellular region	41/1285	360/18903	0.000821137	0.00468137	0.00308516	HLA-DRB1/PLEK/IL1B/RHBDF2/TREM2/SERP1/STX4/FRMD4A/IRS2/TLR4/TLR2/P2RX7/TGFB1/AP1B1/UCP2/TNF/IL1A/MIDN/RAB11FIP1/IGF1/CCL5/GLUL/ALOX5/BLOC1S6/TRPM2/APOE/PIM3/IL1RN/JAK2/FOXO1/ICA1/CD33/PPP3CA/SLC8B1/ABCG1/SLC16A1/KLF7/SUCNR1/HIF1A/ABCA1/ANXA1	41
BP	GO:0071692	protein localization to extracellular region	41/1285	368/18903	0.0012583	0.00662634	0.00436695	HLA-DRB1/PLEK/IL1B/RHBDF2/TREM2/SERP1/STX4/FRMD4A/IRS2/TLR4/TLR2/P2RX7/TGFB1/AP1B1/UCP2/TNF/IL1A/MIDN/RAB11FIP1/IGF1/CCL5/GLUL/ALOX5/BLOC1S6/TRPM2/APOE/PIM3/IL1RN/JAK2/FOXO1/ICA1/CD33/PPP3CA/SLC8B1/ABCG1/SLC16A1/KLF7/SUCNR1/HIF1A/ABCA1/ANXA1	41
BP	GO:0006631	fatty acid metabolic process	41/1285	400/18903	0.00566079	0.0232277	0.0153077	CD74/GPX1/C3/IL1B/ALOX5AP/APOC1/TBXAS1/NR4A3/LTC4S/XBP1/IRS2/LPIN2/AOAH/PRKAG2/ACSL1/DAGLB/PTGS2/HPGDS/SNCA/INSIG1/SIRT1/ALOX5/MLXIPL/ACSM5/PLA2G15/DBI/PTGES3/PTGS1/PHYH/APPL2/APOC2/PLA2G4A/GSTM2/MFSD2A/EDN1/ABHD3/SCD/PDK4/PNPLA8/QKI/ANXA1	41
BP	GO:0045580	regulation of T cell differentiation	40/1285	179/18903	1.52e-11	5.39e-10	3.55e-10	CD74/PTPRC/HLA-DRA/HLA-DRB1/CD83/JUNB/IL18/LILRB4/EGR3/RUNX1/NFKBID/LGALS9/XBP1/FGL2/CD86/NLRP3/NFKBIZ/NCKAP1L/SYK/PNP/ZC3H12A/PRDM1/RIPK2/SMAD7/PTPN2/IRF1/MALT1/HLA-DOA/IL4I1/CARD11/RHOH/DUSP10/ZBTB1/SOCS1/FOXO3/HLX/RUNX3/TNFSF9/NRARP/ANXA1	40
BP	GO:0001906	cell killing	40/1285	189/18903	8.98e-11	2.66e-09	1.75e-09	PTPRC/HLA-DRA/HLA-DRB1/TYROBP/HLA-E/C3/HAVCR2/IL18/HSP90AB1/CTSC/FCGR1A/RPS19/HLA-B/FCGR3A/CLEC7A/CX3CR1/CORO1A/SERPINB9/ARRB2/CTSH/LGALS9/SPI1/P2RX7/CD55/NCKAP1L/ICAM1/SYK/RPL30/ITGAM/STX7/LILRB1/PTPN6/STXBP2/HAMP/VAV1/HLA-A/LYST/TREM1/LYZ/TUBB4B	40
BP	GO:0051403	stress-activated MAPK cascade	40/1285	239/18903	1.04e-07	1.71e-06	1.12e-06	DUSP1/IL1B/DNAJA1/GADD45B/TREM2/PTGER4/LGALS9/NFKB1/SPI1/TLR4/ZFP36/PYCARD/TRIB1/MAP4K4/NAIP/SDCBP/MAP2K3/TNF/SIRPA/IL1A/CYLD/TAOK3/ZC3H12A/TLR7/RASSF2/NCF1/RIPK2/MAP3K5/MYC/FOXO1/SCIMP/CRYAB/ZFP36L1/TLR3/WNT5A/DUSP10/PDCD4/MAP3K11/GADD45G/VEGFA	40
BP	GO:0032868	response to insulin	40/1285	269/18903	2.41e-06	2.95e-05	1.94e-05	SORL1/PTPRE/IL1B/XBP1/LYN/FOS/IRS2/TLR2/PDE3B/LPIN2/GRB2/EGR2/UCP2/SYAP1/SOCS3/CYFIP1/HDAC9/INSIG1/PRKCD/ATP2B1/SIRT1/SNX5/RAB31/BAIAP2/TNFSF10/PTPN2/CFLAR/GNAI2/FOXO1/APPL2/SLC25A33/KCNQ1/PIK3R1/TBC1D4/ZFP36L1/NDEL1/EGR1/SOCS1/PDK4/PIP4K2A	40
BP	GO:0071560	cellular response to transforming growth factor beta stimulus	40/1285	271/18903	2.91e-06	3.47e-05	2.29e-05	ZFP36L2/SKIL/HSPA1A/HSP90AB1/CX3CR1/HTRA1/ARRB2/FOS/SPI1/LDLRAD4/TGFB1/JUN/SDCBP/USP15/CHST11/TGFBR1/HSPA5/SIRT1/SMAD7/APAF1/CFLAR/LPXN/NFATC1/LIMS1/DAB2/APPL2/ADAMTSL2/SMURF2/SKI/ZFP36L1/EDN1/WNT5A/ARID4A/CITED2/ADAM17/ZEB2/SAP30/GCNT2/MEF2C/SPRY2	40
BP	GO:0110053	regulation of actin filament organization	40/1285	278/18903	5.49e-06	6.17e-05	4.07e-05	HCLS1/PLEK/BIN1/COTL1/CORO1A/SCIN/PTGER4/PYCARD/WAS/GRB2/NCKAP1L/CAPG/CCDC88A/PAK1/ARPC3/TMSB10/ARPC2/CYFIP1/ARPC1B/TMSB4X/TGFBR1/ARHGAP18/PRKCD/C9orf72/HCK/BAIAP2/SWAP70/FMN1/CXCL12/FCHSD2/SNX9/SH3BP1/PIK3R1/RAC1/GPR65/S100A10/ARAP1/CAPZA1/SSH1/GMFG	40
BP	GO:0043270	positive regulation of ion transport	40/1285	289/18903	1.41e-05	0.000142332	9.38e-05	CCL3/CTSS/CCL4/IL1B/TREM2/ARRB2/P2RY12/ATP1B1/PDGFB/ADRB2/PTAFR/P2RX7/NDUFA4/CCR1/IL1A/GLRX/HOMER1/VAMP8/ARL6IP1/TMSB4X/P2RX4/SNCA/IFNGR2/CCL5/ATP2B1/CACNB4/SCN1B/CEBPB/CXCL12/PLCG2/WNK1/KCNQ1/KCNMB1/PPP3CA/PLA2G4A/GSTM2/EDN1/KCNJ2/CCL2/VMP1	40
BP	GO:0051146	striated muscle cell differentiation	40/1285	293/18903	1.95e-05	0.00018787	0.000123812	GPX1/BHLHE41/RGS2/CD53/MEF2A/PLEKHO1/KDM6B/ARRB2/XBP1/SLC8A1/DOCK2/TGFB1/TMEM119/SIK1/AKAP13/HDAC9/HOMER1/IGF1/HNRNPU/PIEZO1/RYR1/CFLAR/HAMP/ALPK3/RBM38/EZH2/SKI/KRAS/PPP3CA/PGM5/JAM2/NFATC2/EDN1/TNFSF14/MAML1/PROX1/MORF4L2/SPAG9/MEF2C/VEGFA	40
BP	GO:0051047	positive regulation of secretion	40/1285	304/18903	4.56e-05	0.000395975	0.000260959	HLA-DRB1/SPP1/ITGB2/IL1B/TREM2/SCIN/SERP1/STX4/FRMD4A/XBP1/IRS2/TLR4/TLR2/PTAFR/P2RX7/TGFB1/SDCBP/SYK/IL1A/ITGAM/IGF1/VAMP8/P2RX4/SNCA/GLUL/INHBA/CACNB4/TRPM2/CXCL12/DAB2/JAK2/GNAI2/CD33/PPP3CA/PLA2G4A/EDN1/GAB2/S100A10/ABCG1/HIF1A	40
BP	GO:0031589	cell-substrate adhesion	40/1285	369/18903	0.00236791	0.0113371	0.00747145	ITGB2/ST6GAL1/STK4/SRGAP2/ITGAX/CORO1A/PREX1/RIN2/PDGFB/SERPINE1/PARVG/MAP4K4/TIAM1/RCC2/ARPC2/FERMT3/ITGAM/PDPN/PTPRJ/MERTK/FMN1/ITGA5/LPXN/LIMS1/DAB2/JAK2/LYVE1/GAS6/ITGAL/RAC2/PIK3R1/RAC1/RAB1A/S100A10/CDK6/NEDD9/CSF1/BCL2L11/GCNT2/VEGFA	40
BP	GO:0051098	regulation of binding	40/1285	372/18903	0.00273689	0.0128178	0.00844733	SORL1/NFKBIA/HSP90AB1/STK4/HMOX1/ARRB2/CDKN1A/CTSZ/IFI16/PDGFB/PLAUR/ADRB2/TGFB1/KLF4/JUN/RPL11/EIF4A3/TIAM1/IGF1/TMSB4X/TGFBR1/PRKCD/EPB41/RIPK2/C9orf72/APOE/GTF2B/GTPBP4/DDIT3/DAB2/JAK2/SKI/DAZAP2/FBXW7/TMC8/PPP3CA/S100A10/WNT5A/PLCL2/IFIT2	40
BP	GO:0007178	transmembrane receptor protein serine/threonine kinase signaling pathway	40/1285	390/18903	0.00615882	0.024712	0.0162859	SKIL/SORL1/HSPA1A/HSP90AB1/HTRA1/ARRB2/FOS/SPI1/LDLRAD4/TGFB1/JUN/SDCBP/DDX5/UBE2D3/USP15/CHST11/TGFBR1/HSPA5/INHBA/SIRT1/SMAD7/LPXN/DAB2/JAK2/APPL2/ADAMTSL2/SMURF2/SKI/TGIF2/HEXA/EGR1/WNT5A/ARID4A/CITED2/ADAM17/ZEB2/SAP30/PDCD4/GCNT2/SPRY2	40
BP	GO:0001701	in utero embryonic development	40/1285	393/18903	0.00698576	0.0272201	0.0179388	SKIL/KLF2/JUNB/DNAJB6/STK4/CEBPA/LPAR6/PDGFB/GNA13/KLF4/RPL13/GRB2/VASH1/CMIP/MAFF/SOCS3/IGF1/CHD7/CHST11/TGFBR1/PRDM1/MGAT1/CEBPB/ZFAND5/SPINT2/ADAM10/SLC30A1/CASP8/ZFP36L1/NDEL1/POLB/EDN1/YTHDC1/MAFG/CITED2/MBNL1/RBBP8/BCL2L11/VEGFA/HIF1A	40
BP	GO:0002688	regulation of leukocyte chemotaxis	39/1285	127/18903	3.83e-16	2.81e-14	1.85e-14	CD74/CSF1R/CCL3/AIF1/DUSP1/CCL4/C3AR1/CX3CR1/LGALS9/LYN/LGMN/C5AR1/SPI1/SERPINE1/NCKAP1L/CCR1/IL6R/PADI2/RIN3/CCL5/SWAP70/ADAM10/CXCL12/WNK1/GPSM3/GAS6/OXSR1/RAC2/RAC1/SLC8B1/EDN1/WNT5A/CCL2/TNFSF14/ADAM17/MPP1/NEDD9/CSF1/VEGFA	39
BP	GO:0034341	response to interferon-gamma	39/1285	140/18903	1.42e-14	8.3e-13	5.47e-13	CD74/CCL3/HLA-DPA1/AIF1/CCL4/CXCL16/IFNGR1/CCL3L1/IRF8/LGALS9/SLC11A1/STX4/TLR4/TLR2/RPL13A/WAS/CCL3L3/TNF/SIRPA/ACTR3/GBP2/SNCA/CASP1/ACTR2/IFNGR2/CCL5/GCH1/HCK/CCL4L1/PTPN2/PARP14/JAK2/IRF1/TLR3/EDN1/WNT5A/CCL2/SOCS1/CCL20	39
BP	GO:0060759	regulation of response to cytokine stimulus	39/1285	179/18903	6.14e-11	1.87e-09	1.23e-09	CD74/PTPRC/LAPTM5/HSPA1A/HSPA1B/TREM2/CXCR4/TNFAIP3/TLR4/TLR2/KLF4/PYCARD/IRAK2/NAIP/SAMHD1/SYK/CYLD/PADI2/CASP1/CCL5/RIPK2/PTPN6/CARD8/IL1RN/IRAK3/PTPN2/SH2B3/PARP14/IRF7/GAS6/CASP8/YTHDF3/EDN1/CASP4/WNT5A/SOCS1/ADAM17/CSF1/HIF1A	39
BP	GO:0010952	positive regulation of peptidase activity	39/1285	194/18903	7.58e-10	1.91e-08	1.26e-08	LAPTM5/HSPD1/HSPE1/CLEC7A/PMAIP1/CTSH/LGALS9/LYN/IFI16/LGMN/RPS3/MBP/NLRP3/PYCARD/TNF/SYK/SNCA/GRN/CASP1/RIPK2/PSME4/SIRT1/TNFSF10/CARD8/APAF1/MAP3K5/MYC/CFLAR/CASP10/JAK2/NLRP1/MALT1/CASP8/DDX3X/TANK/AKIRIN2/PICALM/BID/BCL2L11	39
BP	GO:0070374	positive regulation of ERK1 and ERK2 cascade	39/1285	223/18903	4.45e-08	7.9e-07	5.2e-07	CD74/PTPRC/HLA-DRB1/CSF1R/CCL3/CCL4/HAVCR2/GPR183/CCL3L1/TREM2/ARRB2/LGALS9/C5AR1/TLR4/PDGFB/TGFB1/PYCARD/JUN/CCL3L3/ICAM1/CCR1/TNF/IL1A/IGF1/CCL5/RIPK2/INHBA/APOE/CCL4L1/CFLAR/GNAI2/GAS6/SCIMP/FBXW7/CCL2/PRKCA/CCL20/GCNT2/SPRY2	39
BP	GO:0007599	hemostasis	39/1285	231/18903	1.18e-07	1.92e-06	1.26e-06	PLEK/FCER1G/P2RY12/LYN/PABPC4/TLR4/PDGFB/PLAUR/IL6ST/SERPINE1/GNA13/WAS/ENTPD1/SYK/FERMT3/SERPINA1/RAP2B/GNAQ/PDPN/PRKCD/PTPN6/BLOC1S6/MERTK/APOE/MMRN1/FLI1/JMJD1C/SH2B3/PLCG2/JAK2/PIK3CG/VAV1/GAS6/NFE2L2/PLA2G4A/EDN1/GNAS/PRKCA/DGKA	39
BP	GO:2001234	negative regulation of apoptotic signaling pathway	39/1285	233/18903	1.49e-07	2.4e-06	1.58e-06	CD74/GPX1/NR4A2/HSPA1A/SOD2/IL1B/HSPA1B/TPT1/DNAJA1/HMOX1/CX3CR1/MCL1/ARRB2/TNFAIP3/IVNS1ABP/XBP1/PLAUR/SERPINE1/HERPUD1/ICAM1/TNF/IL1A/PPIF/PTGS2/IGF1/TGFBR1/SIRT1/ARHGEF2/SIAH2/CXCL12/PIH1D1/CFLAR/GNAI2/NFE2L2/DDX3X/MDM2/ITPRIP/BID/HIF1A	39
BP	GO:0045055	regulated exocytosis	39/1285	242/18903	4.1e-07	5.95e-06	3.92e-06	CCL3/ITGB2/PLEK/CD84/HMOX1/FCGR3A/CORO1A/SCIN/NR4A3/LGALS9/STX4/LYN/SPI1/LAT2/PTAFR/P2RX7/NCKAP1L/SNAP23/SYK/CD300A/ABCC4/ITGAM/RAB11FIP1/VAMP8/BTK/SNCA/STX11/CACNB4/BLOC1S6/HCK/RAB31/STXBP2/MICAL1/PIK3CG/GNAI2/RAC2/SYT6/GAB2/MILR1	39
BP	GO:0051091	positive regulation of DNA-binding transcription factor activity	39/1285	266/18903	4.54e-06	5.18e-05	3.41e-05	HCLS1/HSPA1A/IL18/IL1B/HSPA1B/CLEC7A/CX3CR1/LGALS9/RPS3/NLRP3/TLR4/NPM1/TLR2/PYCARD/IRAK2/TNF/LPAR5/TRIM38/BTK/TLR6/RIPK2/IL1RAP/TFRC/ARHGEF2/IRAK3/CYTL1/DDIT3/CFLAR/PLCG2/JAK2/TRIM22/MALT1/PPP3CA/TLR3/EDN1/CARD11/WNT5A/PRKCH/VEGFA	39
BP	GO:0051924	regulation of calcium ion transport	39/1285	268/18903	5.45e-06	6.13e-05	4.04e-05	CCL3/CCL4/BIN1/CD84/CORO1A/CXCR4/ARRB2/LYN/SLC8A1/ATP1B1/PDGFB/PRNP/P2RX7/CCR1/PTGS2/HOMER1/CHD7/P2RX4/SNCA/CCL5/EPB41/ATP2B1/LILRB1/CACNB4/PTPN6/HOMER3/PDE4B/CXCL12/IL16/PLCG2/PIK3CG/GNAI2/SLC30A1/CD33/PPP3CA/SLC8B1/GSTM2/CCL2/VMP1	39
BP	GO:0042063	gliogenesis	39/1285	310/18903	0.000149006	0.00108127	0.000712591	CSF1R/CCL3/C1QA/ID2/IL1B/BIN1/GPR183/SRGAP2/CX3CR1/IFNGR1/TREM2/CXCR4/P2RY12/LYN/C5AR1/TLR4/MIR142/TLR2/IL6ST/TGFB1/SLC7A5/EGR2/TNF/TNFRSF1B/P2RX4/GRN/NDRG1/EZH2/SKI/KRAS/LDLR/PLAG1/CCL2/DUSP10/PRKCH/CDK6/RHEB/CSF1/ANXA1	39
BP	GO:0048638	regulation of developmental growth	39/1285	332/18903	0.000600279	0.00355507	0.0023429	SPP1/RGS2/STK4/RUNX1/CXCR4/CDKN1A/SERP1/LGMN/ADRB2/SEMA4D/IFRD1/BASP1/ARHGAP4/CYFIP1/IGF1/CHD7/TGFBR1/SMAD7/APOE/CXCL12/DUSP6/HAMP/ITSN2/DIP2B/NDEL1/MFSD2A/EDN1/WNT5A/GOLGA4/PIM1/DUSP10/CITED2/PROX1/CSF1/BCL2L11/HLX/SPAG9/MEF2C/VEGFA	39
BP	GO:0062012	regulation of small molecule metabolic process	39/1285	339/18903	0.000897353	0.00499794	0.00329379	CD74/PLEK/IL1B/APOC1/PMAIP1/TREM2/NR4A3/NFKB1/IRS2/PTAFR/P2RX7/TNF/PRKAG2/SIK1/MIDN/PTGS2/IGF1/TMSB4X/SNCA/DDIT4/INSIG1/SIRT1/MLXIPL/APOE/RANBP2/PTPN2/SLC7A7/DAB2/FOXO1/APPL2/APOC2/LDLR/MFSD2A/EGR1/ABCG1/PROX1/PDK4/HIF1A/ANXA1	39
BP	GO:0002761	regulation of myeloid leukocyte differentiation	38/1285	122/18903	5.41e-16	3.87e-14	2.55e-14	CD74/HLA-DRB1/TYROBP/CCL3/C1QC/ID2/HCLS1/LILRB4/EVI2B/RUNX1/TREM2/KLF10/MAFB/LYN/INPP5D/FOS/TLR4/TGFB1/TRIB1/CCR1/TNF/RASSF2/INHBA/LILRB1/CEBPB/PTPN2/MYC/IRF7/CASP8/FBXW7/PPP3CA/PIK3R1/ZFP36L1/TLR3/PRKCA/CDK6/NEDD9/CSF1	38
BP	GO:0071675	regulation of mononuclear cell migration	38/1285	123/18903	7.32e-16	5.18e-14	3.41e-14	CSF1R/CCL3/AIF1/DUSP1/CCL4/DOCK8/C3AR1/CX3CR1/CORO1A/LGALS9/LYN/LGMN/C5AR1/SPI1/SERPINE1/PYCARD/ABL2/CCR1/TNF/PADI2/STK10/SPNS2/CCL5/ADAM10/CXCL12/WNK1/GAS6/OXSR1/JAM2/SLC8B1/SPN/WNT5A/CCL2/TNFSF14/ADAM17/CCL20/NEDD9/CSF1	38
BP	GO:0009266	response to temperature stimulus	38/1285	186/18903	7.71e-10	1.93e-08	1.27e-08	HSP90AA1/NFKBIA/HSPD1/HSPA1A/SOD2/IER5/HSP90AB1/DNAJB1/HSPA1B/DNAJA1/DNAJB6/HMOX1/DNAJA4/BAG3/HSPA6/CXCR4/ARRB2/CHORDC1/LYN/FOS/TFEC/ADRB2/CD14/UCP2/ATM/IL1A/PTGS2/IGF1/ATP2B1/SIRT1/METRNL/TRPM2/DNAJC2/CXCL12/FOXO1/APPL2/CASP8/CRYAB	38
BP	GO:0008154	actin polymerization or depolymerization	38/1285	200/18903	6.5e-09	1.34e-07	8.83e-08	AIF1/HCLS1/PLEK/BIN1/COTL1/CORO1A/SCIN/PREX1/PYCARD/WAS/ABI1/GRB2/NCKAP1L/CAPG/ARPC3/TMSB10/WIPF1/ARPC2/CYFIP1/ARPC1B/TMSB4X/ARHGAP18/PRKCD/HCK/BAIAP2/SWAP70/FMN1/DIAPH2/MICAL1/CXCL12/FCHSD2/JAK2/SNX9/SH3BP1/CORO7/RAC1/CAPZA1/SSH1	38
BP	GO:0000302	response to reactive oxygen species	38/1285	204/18903	1.14e-08	2.26e-07	1.49e-07	GPX1/KLF2/SOD2/HMOX1/PLK3/KDM6B/TNFAIP3/NR4A3/RPS3/PPP1R15B/FOS/SLC8A1/JUN/UCP2/SIRPA/IL1A/PPIF/BTK/OSER1/NCF1/PRKCD/GCH1/SIRT1/TRPM2/APOE/ERN1/MAP3K5/EZH2/NFE2L2/CRYAB/EDN1/MMP2/FOXO3/NET1/SETX/RHOB/HIF1A/ANXA1	38
BP	GO:0007596	blood coagulation	38/1285	225/18903	1.69e-07	2.69e-06	1.77e-06	PLEK/FCER1G/P2RY12/LYN/PABPC4/TLR4/PDGFB/PLAUR/IL6ST/SERPINE1/GNA13/WAS/ENTPD1/SYK/FERMT3/SERPINA1/RAP2B/GNAQ/PDPN/PRKCD/PTPN6/BLOC1S6/MERTK/APOE/MMRN1/JMJD1C/SH2B3/PLCG2/JAK2/PIK3CG/VAV1/GAS6/NFE2L2/PLA2G4A/EDN1/GNAS/PRKCA/DGKA	38
BP	GO:0050817	coagulation	38/1285	230/18903	3.02e-07	4.46e-06	2.94e-06	PLEK/FCER1G/P2RY12/LYN/PABPC4/TLR4/PDGFB/PLAUR/IL6ST/SERPINE1/GNA13/WAS/ENTPD1/SYK/FERMT3/SERPINA1/RAP2B/GNAQ/PDPN/PRKCD/PTPN6/BLOC1S6/MERTK/APOE/MMRN1/JMJD1C/SH2B3/PLCG2/JAK2/PIK3CG/VAV1/GAS6/NFE2L2/PLA2G4A/EDN1/GNAS/PRKCA/DGKA	38
BP	GO:0033002	muscle cell proliferation	38/1285	247/18903	1.86e-06	2.33e-05	1.54e-05	AIF1/ID2/SOD2/IL18/HMOX1/RUNX1/TNFAIP3/CDKN1A/NR4A3/FOS/TLR4/PDGFB/PTAFR/GNA13/TGFB1/TRIB1/JUN/TNF/IL6R/PTGS2/IGF1/TGFBR1/CCL5/APOE/ERN1/MAP3K5/DDIT3/CFLAR/JAK2/GNAI2/SKI/EDN1/MMP2/HBEGF/PIM1/CITED2/PDCD4/MEF2C	38
BP	GO:0009914	hormone transport	38/1285	300/18903	0.00015641	0.00112794	0.000743347	HLA-DRB1/SPP1/IL1B/SERP1/STX4/LYN/IRS2/SLC7A5/UCP2/TNF/OSM/SNAP23/MIDN/RAB11FIP1/VAMP8/CHD7/BTK/CCL5/GLUL/INHBA/ALOX5/TRPM2/PIM3/IL1RN/DAB2/JAK2/SLC7A8/FOXO1/ICA1/KCNQ1/PPP3CA/SLC8B1/EDN1/RAB1A/SLC16A1/KLF7/HIF1A/ANXA1	38
BP	GO:0019932	second-messenger-mediated signaling	38/1285	314/18903	0.000393548	0.00249649	0.00164526	PTPRC/CCL3/CCL4/PLEK/FCGR3A/CLEC7A/CX3CR1/TREM2/CXCR4/P2RY12/SLC8A1/ATP1B1/FPR1/LAT2/PRNP/P2RX7/PDE3B/CCR1/TNF/SYK/IGF1/P2RX4/BTK/PTPRJ/TRPM2/APOE/HOMER3/NFATC1/CCRL2/PLCG2/PPP3CA/NFATC2/GSTM2/EDN1/ITPR2/PDE7A/CCL20/VEGFA	38
BP	GO:0042102	positive regulation of T cell proliferation	37/1285	106/18903	1.9e-17	1.72e-15	1.13e-15	PTPRC/HLA-E/HLA-DPA1/AIF1/HAVCR2/HLA-DPB1/IL18/IL1B/CORO1A/LGALS9/HLA-DMB/CD86/RPS3/IL6ST/PYCARD/CD55/NCKAP1L/SYK/PNP/IL1A/IGF1/RASAL3/CCL5/RIPK2/CCDC88B/TFRC/ICOSLG/TNFSF13B/TMIGD2/JAK2/TNFRSF13C/HLA-A/EBI3/PPP3CA/CARD11/TNFSF9/ANXA1	37
BP	GO:0046634	regulation of alpha-beta T cell activation	37/1285	115/18903	4.02e-16	2.91e-14	1.92e-14	PTPRC/HLA-DRA/HLA-DRB1/CD83/HSPH1/HLA-E/JUNB/IL18/LILRB4/RUNX1/NFKBID/LGALS9/CD86/NLRP3/NFKBIZ/CD55/NCKAP1L/SYK/PNP/CD300A/ZC3H12A/PRDM1/RASAL3/RIPK2/LILRB1/SMAD7/JAK2/IRF1/HLA-A/MALT1/EBI3/ARG2/CARD11/SOCS1/HLX/RUNX3/ANXA1	37
BP	GO:0002367	cytokine production involved in immune response	37/1285	120/18903	1.89e-15	1.2e-13	7.94e-14	CD74/LAPTM5/HLA-E/IL18/IL1B/HMOX1/LILRB4/CLEC7A/DDX21/NR4A3/LITAF/NLRP3/TLR4/P2RX7/TGFB1/PYCARD/CD55/SLC7A5/TNF/SYK/TNFRSF1B/BTK/TLR7/RIPK2/LILRB1/SIRT1/SMAD7/ARID5A/IRAK3/PLCG2/HLA-A/MALT1/SCIMP/TREM1/TLR3/UBE2J1/WNT5A	37
BP	GO:0032612	interleukin-1 production	37/1285	130/18903	3.2e-14	1.74e-12	1.14e-12	TYROBP/CCL3/HAVCR2/LILRB4/CLEC7A/CX3CR1/TREM2/ARRB2/TNFAIP3/LGALS9/IFI16/NLRP3/TLR4/MIR142/P2RX7/PYCARD/NAIP/TNF/SIRPA/ZC3H12A/IGF1/TLR6/CASP1/RIPK2/CARD8/TMEM106A/IL16/JAK2/GAS6/NLRP1/MALT1/CASP8/ARG2/CD33/EGR1/WNT5A/ANXA1	37
BP	GO:0032652	regulation of interleukin-1 production	37/1285	130/18903	3.2e-14	1.74e-12	1.14e-12	TYROBP/CCL3/HAVCR2/LILRB4/CLEC7A/CX3CR1/TREM2/ARRB2/TNFAIP3/LGALS9/IFI16/NLRP3/TLR4/MIR142/P2RX7/PYCARD/NAIP/TNF/SIRPA/ZC3H12A/IGF1/TLR6/CASP1/RIPK2/CARD8/TMEM106A/IL16/JAK2/GAS6/NLRP1/MALT1/CASP8/ARG2/CD33/EGR1/WNT5A/ANXA1	37
BP	GO:0034101	erythrocyte homeostasis	37/1285	137/18903	1.93e-13	9.42e-12	6.21e-12	ID2/HCLS1/KLF2/HSPA1A/HSPA1B/HMOX1/RPS19/RPS24/IKZF1/MAFB/LYN/INPP5D/RPS6/SPI1/ZFP36/NCKAP1L/RPS14/JMJD6/TAL1/ALAS1/DNASE2/SLC11A2/INHBA/PTPN2/PTBP3/PKNOX1/SH2B3/JAK2/HSPA9/KCNQ1/ZFP36L1/ARID4A/CITED2/CDK6/FOXO3/VEGFA/HIF1A	37
BP	GO:0043123	positive regulation of I-kappaB kinase/NF-kappaB signaling	37/1285	189/18903	4.4e-09	9.3e-08	6.13e-08	CD74/REL/HLA-DRB1/IL1B/HMOX1/CLEC7A/DDX21/LGALS9/LITAF/PELI1/TLR4/ATP2C1/SLC20A1/TNF/IL1A/AKAP13/TRIM38/TAB2/TLR6/CASP1/RIPK2/TFRC/TNFSF10/TMEM106A/TNFRSF10B/BIRC3/CFLAR/CASP10/TRIM22/PLK2/MALT1/CASP8/NUP62/TLR3/CARD11/S100A4/ALPK1	37
BP	GO:0050731	positive regulation of peptidyl-tyrosine phosphorylation	37/1285	193/18903	7.97e-09	1.62e-07	1.06e-07	CD74/PTPRC/CSF1R/HCLS1/IL18/FCGR1A/TREM2/ARRB2/LYN/PDGFB/PRNP/IL6ST/TGFB1/SEMA4D/ABI1/TNF/OSM/SYK/EHD4/IL6R/IGF1/LRRK1/NCF1/CCL5/RIPK2/PTPRJ/ARHGEF2/ITGA5/PARP14/PLCG2/JAK2/GAS6/FBXW7/HBEGF/ADAM17/NEDD9/VEGFA	37
BP	GO:0031396	regulation of protein ubiquitination	37/1285	210/18903	8.05e-08	1.35e-06	8.87e-07	LAPTM5/HSP90AA1/HSPA1A/RPS2/HSP90AB1/HSPA1B/DNAJA1/RPS20/RPL37/ARRB2/TNFAIP3/IVNS1ABP/RPS3/PELI1/NPM1/HERPUD1/RPL23/RPL11/UBB/RASSF5/ARRDC3/TGFBR1/HSPA5/RIPK2/SMAD7/SIAH2/BIRC3/RPL5/GTPBP4/MALT1/DDX3X/FBXW7/RPS15/SQSTM1/TBC1D7/USP4/SPRY2	37
BP	GO:0043523	regulation of neuron apoptotic process	37/1285	218/18903	2.15e-07	3.32e-06	2.19e-06	TYROBP/CCL3/NR4A2/SOD2/HSP90AB1/HMOX1/CX3CR1/CORO1A/MCL1/TREM2/ARRB2/BTG2/LGMN/PRNP/IL6ST/JUN/NAIP/TNF/ATM/ITGAM/CLN8/CPEB4/SNCA/GRN/GRID2/APOE/CEBPB/DDIT3/JAK2/FBXW7/KRAS/CCL2/FOXO3/MAP3K11/BCL2L11/MEF2C/HIF1A	37
BP	GO:0006457	protein folding	37/1285	223/18903	3.86e-07	5.63e-06	3.71e-06	CD74/HSPH1/HSP90AA1/HSPD1/HSPA1A/HSP90AB1/DNAJB1/HSPA1B/DNAJA1/DNAJB6/DNAJA4/BAG3/HSPE1/HSPA6/HSPA8/CHORDC1/TCP1/WIPF1/PPIF/FKBP4/GRN/HSPA5/AHSA1/STIP1/RANBP2/CCT4/DNAJC2/PTGES3/ENGASE/ATF6/NGLY1/GAK/HSPA9/CRYAB/NUDC/DNAJB11/HSPA1L	37
BP	GO:0010594	regulation of endothelial cell migration	37/1285	230/18903	8.44e-07	1.15e-05	7.55e-06	HMOX1/DNAJA4/LGMN/RIN2/PDGFB/TGFB1/KLF4/MAP2K3/TNF/SERPINF1/VASH1/ZC3H12A/PTGS2/HDAC9/TMSB4X/P2RX4/MIR29A/GRN/GLUL/SIRT1/APOE/PIK3CG/PLK2/SH3BP1/NFE2L2/FBXW7/RAC1/EDN1/WNT5A/PRKCA/PROX1/ADAM17/RHOB/MEF2C/VEGFA/HIF1A/ANXA1	37
BP	GO:0045444	fat cell differentiation	37/1285	244/18903	3.58e-06	4.15e-05	2.74e-05	GPX1/ZFP36L2/RGS2/ID2/NR4A2/SOD2/STK4/NR4A1/NR4A3/MAFB/XBP1/CEBPA/ZFP36/ADRB2/TGFB1/ARL4A/KLF4/EGR2/TNF/ZC3H12A/SYAP1/PTGS2/JDP2/HNRNPU/INSIG1/SIRT1/ALOX5/METRNL/OSBPL11/CEBPB/DDIT3/FOXO1/ZFP36L1/WNT5A/PIM1/DUSP10/SOCS1	37
BP	GO:0010466	negative regulation of peptidase activity	37/1285	263/18903	2.03e-05	0.000194837	0.000128403	GPX1/C3/CTSB/SORL1/BIN1/DNAJB6/NR4A1/SERPINB9/ARRB2/IFI16/PLAUR/PRNP/SERPINE1/KLF4/NAIP/TNF/SERPINF1/PTGS2/SERPINA1/ARL6IP1/SNCA/RPS6KA1/RPS6KA3/CARD8/SPINT2/SIAH2/CST3/BIRC3/MICAL1/PIH1D1/GAS6/DDX3X/PICALM/CRYAB/TNFSF14/TNFAIP8/VEGFA	37
BP	GO:0007517	muscle organ development	37/1285	348/18903	0.00463944	0.0197066	0.0129872	GPX1/MEF2A/EGR3/NR4A1/SERP1/BTG2/XBP1/FOS/TGFB1/EGR2/BASP1/DDX5/MAFF/HDAC9/HOMER1/IGF1/CHD7/TGFBR1/ATF3/CHD2/SIRT1/SMAD7/RYR1/GPCPD1/CFLAR/SKI/KRAS/PPP3CA/CRYAB/EGR1/WNT5A/HBEGF/CITED2/PROX1/SAP30/HLX/MEF2C	37
BP	GO:0031346	positive regulation of cell projection organization	37/1285	352/18903	0.00557692	0.0229326	0.0151133	SKIL/HSP90AA1/RGS2/P2RY12/FSCN1/LYN/P2RX7/ABL2/SEMA4D/SERPINF1/CCDC88A/TIAM1/ACTR3/ARPC2/CYFIP1/TGFBR1/GRN/ACTR2/HSPA5/SCN1B/BAIAP2/APOE/CXCL12/CFLAR/EZH2/NFE2L2/RAC2/PIK3R1/RAC1/NDEL1/WNT5A/GOLGA4/ARAP1/NEDD9/SETX/ENC1/VEGFA	37
BP	GO:0016311	dephosphorylation	37/1285	357/18903	0.00696881	0.0271905	0.0179194	PTPRC/DUSP1/PLEK/PTPRE/HSP90AB1/PPP1R15A/DUSP2/INPP5D/PPP1R15B/PTP4A1/TGFB1/CTTNBP2NL/SEMA4D/NCKAP1L/TNF/CD300A/PRKCD/SLC39A10/PTPN6/PTPRJ/SWAP70/PTPN2/DUSP4/DUSP6/JAK2/GNAI2/DAPP1/CD33/PPP3CA/MTMR10/PTP4A2/DUSP28/SSH1/DUSP10/PPP2R5C/DUSP5/MEF2C	37
BP	GO:0002718	regulation of cytokine production involved in immune response	36/1285	118/18903	6.57e-15	3.97e-13	2.61e-13	CD74/LAPTM5/HLA-E/IL18/IL1B/HMOX1/LILRB4/CLEC7A/DDX21/NR4A3/LITAF/NLRP3/TLR4/P2RX7/TGFB1/PYCARD/CD55/SLC7A5/TNF/SYK/TNFRSF1B/BTK/TLR7/RIPK2/LILRB1/SIRT1/SMAD7/ARID5A/IRAK3/PLCG2/HLA-A/MALT1/SCIMP/TLR3/UBE2J1/WNT5A	36
BP	GO:0002224	toll-like receptor signaling pathway	36/1285	123/18903	2.75e-14	1.52e-12	1e-12	CTSS/NFKBIA/HSPD1/HAVCR2/TREM2/ARRB2/TNFAIP3/LYN/PELI1/TLR4/TLR2/CD14/NINJ1/IRAK2/TNF/CD300A/TLR1/LY96/BTK/TLR7/TLR6/RIPK2/RPS6KA3/TLR5/IRAK3/BIRC3/PIK3AP1/PLCG2/IRF7/IRF1/APPL2/SCIMP/DDX3X/UNC93B1/TLR3/TLR10	36
BP	GO:0030183	B cell differentiation	36/1285	152/18903	2.68e-11	8.94e-10	5.89e-10	PTPRC/ZFP36L2/ID2/GPR183/IRF8/KLF6/XBP1/INPP5D/SPI1/LYL1/NCKAP1L/SYK/BLNK/ATM/HHEX/DOCK10/ST3GAL1/HDAC9/BTK/INHBA/PTPN6/PTPRJ/PTPN2/TNFSF13B/PLCG2/EZH2/MALT1/IL4I1/PIK3R1/CMTM7/ZFP36L1/CARD11/ITFG2/PLCL2/ZBTB1/ADAM17	36
BP	GO:0001959	regulation of cytokine-mediated signaling pathway	36/1285	167/18903	4.55e-10	1.22e-08	8.05e-09	CD74/PTPRC/LAPTM5/HSPA1A/HSPA1B/TREM2/CXCR4/TNFAIP3/PYCARD/IRAK2/NAIP/SAMHD1/SYK/CYLD/PADI2/CASP1/CCL5/RIPK2/PTPN6/CARD8/IL1RN/IRAK3/PTPN2/SH2B3/PARP14/IRF7/GAS6/CASP8/YTHDF3/EDN1/CASP4/WNT5A/SOCS1/ADAM17/CSF1/HIF1A	36
BP	GO:2001242	regulation of intrinsic apoptotic signaling pathway	36/1285	172/18903	1.07e-09	2.61e-08	1.72e-08	CD74/GPX1/SKIL/HSPA1A/SOD2/TPT1/DNAJA1/PMAIP1/MCL1/TREM2/IVNS1ABP/XBP1/RPS3/PLAUR/PYCARD/HERPUD1/RPL11/UBB/RPL26/CYLD/PPIF/PTGS2/SFPQ/SIRT1/ARHGEF2/PTPN2/CXCL12/MYC/DDIT3/NFE2L2/DDX3X/FBXW7/MDM2/BID/BCL2L11/HIF1A	36
BP	GO:0010950	positive regulation of endopeptidase activity	36/1285	174/18903	1.49e-09	3.55e-08	2.34e-08	LAPTM5/HSPD1/HSPE1/CLEC7A/PMAIP1/CTSH/LGALS9/LYN/IFI16/LGMN/RPS3/MBP/NLRP3/PYCARD/TNF/SYK/SNCA/CASP1/RIPK2/SIRT1/TNFSF10/CARD8/APAF1/MAP3K5/MYC/CFLAR/CASP10/JAK2/NLRP1/MALT1/CASP8/DDX3X/AKIRIN2/PICALM/BID/BCL2L11	36
BP	GO:0002706	regulation of lymphocyte mediated immunity	36/1285	179/18903	3.34e-09	7.26e-08	4.78e-08	PTPRC/HLA-DRA/HLA-DRB1/HLA-E/C3/HSPD1/HAVCR2/IL18/IL1B/FCGR1A/HLA-B/LILRB4/TREM2/SERPINB9/ARRB2/LGALS9/NLRP3/P2RX7/TGFB1/WAS/CD55/NCKAP1L/TNF/TNFRSF1B/STX7/BTK/LILRB1/PTPN6/SMAD7/TFRC/ARID5A/VAV1/HLA-A/MALT1/IL4I1/ZBTB1	36
BP	GO:0043409	negative regulation of MAPK cascade	36/1285	181/18903	4.57e-09	9.56e-08	6.3e-08	PTPRC/SORL1/RGS2/DUSP1/IL1B/DNAJA1/LILRB4/DUSP2/TREM2/LYN/TLR4/P2RX7/SIRPA/CD300A/CYLD/TAOK3/RNF149/ATF3/PRKCD/PTPN6/PTPRJ/RANBP9/APOE/IRAK3/PTPN2/MYC/SH2B3/DUSP4/DAB2/DUSP6/FOXO1/NUP62/DUSP10/PDCD4/DUSP5/SPRY2	36
BP	GO:0006469	negative regulation of protein kinase activity	36/1285	216/18903	4.94e-07	7.06e-06	4.65e-06	PTPRC/SORL1/RGS2/DUSP1/IL1B/DNAJA1/GADD45B/LILRB4/TNFAIP3/CDKN1A/CHORDC1/LYN/CEBPA/SLC8A1/NPM1/PYCARD/TRIB1/PRKAG2/CD300A/HHEX/GNAQ/SNCA/PRKCD/SIRT1/PTPN6/PTPRJ/APOE/IRAK3/PTPN2/SH2B3/NUP62/IPO7/DEPTOR/DUSP10/PDCD4/SPRY2	36
BP	GO:0031669	cellular response to nutrient levels	36/1285	231/18903	2.53e-06	3.07e-05	2.02e-05	HMOX1/CD68/PMAIP1/HSPA8/CDKN1A/KLF10/XBP1/IFI16/FOS/FOLR2/PLIN2/GABARAPL1/SLC7A5/UCP2/PRKAG2/SIK1/ZC3H12A/CPEB4/ATF3/HSPA5/GLUL/UPP1/ATP2B1/SIRT1/MIOS/MAP3K5/FOXO1/GAS6/NFE2L2/MAP1LC3B/DSC2/MFSD2A/ITFG2/PIM1/FOXO3/PDK4	36
BP	GO:0010951	negative regulation of endopeptidase activity	36/1285	252/18903	1.86e-05	0.000180331	0.000118844	GPX1/C3/SORL1/BIN1/DNAJB6/NR4A1/SERPINB9/ARRB2/IFI16/PLAUR/PRNP/SERPINE1/KLF4/NAIP/TNF/SERPINF1/PTGS2/SERPINA1/ARL6IP1/SNCA/RPS6KA1/RPS6KA3/CARD8/SPINT2/SIAH2/CST3/BIRC3/MICAL1/PIH1D1/GAS6/DDX3X/PICALM/CRYAB/TNFSF14/TNFAIP8/VEGFA	36
BP	GO:1903532	positive regulation of secretion by cell	36/1285	278/18903	0.000148245	0.0010771	0.00070984	HLA-DRB1/SPP1/ITGB2/IL1B/TREM2/SERP1/STX4/FRMD4A/IRS2/TLR4/TLR2/PTAFR/P2RX7/TGFB1/SDCBP/SYK/IL1A/ITGAM/IGF1/VAMP8/P2RX4/SNCA/GLUL/INHBA/CACNB4/TRPM2/CXCL12/DAB2/JAK2/CD33/PLA2G4A/EDN1/GAB2/S100A10/ABCG1/HIF1A	36
BP	GO:0044843	cell cycle G1/S phase transition	36/1285	280/18903	0.00017117	0.00120873	0.000796591	AIF1/ID2/PLK3/CDKN1A/EIF4E/RPS6/CCNH/KLF4/RPL26/ATM/MIR29A/INHBA/CACNB4/PTPN6/BCAT1/MLF1/GSPT1/MYC/PLCG2/PLK2/APPL2/EZH2/CACUL1/DDX3X/FBXW7/GPR132/PPP3CA/DBF4/MDM2/CCL2/CDK6/ADAM17/BID/MAP3K11/RBBP8/ANXA1	36
BP	GO:0046879	hormone secretion	36/1285	291/18903	0.000364049	0.00232206	0.00153031	HLA-DRB1/SPP1/IL1B/SERP1/STX4/LYN/IRS2/UCP2/TNF/OSM/SNAP23/MIDN/RAB11FIP1/VAMP8/CHD7/BTK/CCL5/GLUL/INHBA/ALOX5/TRPM2/PIM3/IL1RN/DAB2/JAK2/FOXO1/ICA1/KCNQ1/PPP3CA/SLC8B1/EDN1/RAB1A/SLC16A1/KLF7/HIF1A/ANXA1	36
BP	GO:0048511	rhythmic process	36/1285	302/18903	0.000730877	0.00422074	0.00278159	BHLHE41/ID2/EGR3/ARRB2/KLF10/CREM/JUND/TNF/SERPINF1/DDX5/SIK1/NFKB2/NAMPT/HOMER1/GNAQ/SFPQ/HNRNPU/NFIL3/HSPA5/RELB/INHBA/SIRT1/TRPM2/SIAH2/BHLHE40/CSNK1D/NRIP1/EZH2/FBXW7/MMP2/EGR1/PROX1/TOP1/FOXO3/MMP19/SETX	36
BP	GO:0015849	organic acid transport	36/1285	324/18903	0.00252202	0.0119174	0.00785393	RGS2/SLCO2B1/IL1B/SLC11A1/IRS2/FOLR2/P2RX7/PLIN2/SLC7A5/SLC1A5/TNF/SYK/SLC16A3/IL1A/ACSL1/EMB/ABCC4/CLN8/SLC43A2/ARL6IP1/P2RX4/SNCA/CACNB4/APOE/SLC7A7/SLC7A8/SLC25A29/PLA2G4A/MFSD2A/EDN1/MFSD12/SLC3A2/SLC16A1/PNPLA8/ABCG2/ANXA1	36
BP	GO:0060249	anatomical structure homeostasis	36/1285	333/18903	0.00396584	0.0173278	0.0114195	CSF1R/SPP1/BAG3/CORO1A/TNFAIP3/CTSH/MBP/INPP5D/TLR4/ADRB2/P2RX7/GAA/TMEM119/SYK/PTGS2/HOMER1/CLN8/P2RX4/TPP1/LRRK1/ATP2B1/LIPA/TFRC/CYTL1/HAMP/SNX10/KRAS/JAM2/MFSD2A/LYZ/PRKCA/PDK4/CSF1/GCNT2/VEGFA/HIF1A	36
BP	GO:0032755	positive regulation of interleukin-6 production	35/1285	99/18903	8.83e-17	7.53e-15	4.96e-15	CD74/TYROBP/AIF1/HSPD1/IL1B/CLEC7A/LGALS9/XBP1/MBP/TLR4/TLR2/PTAFR/P2RX7/PYCARD/POU2F2/TNF/SYK/IL1A/IL6R/TLR1/IL17RA/BTK/TLR7/TLR6/RIPK2/IL1RAP/ARID5A/TMEM106A/ARHGEF2/IL16/PLCG2/SCIMP/AKIRIN2/TLR3/WNT5A	35
BP	GO:0002821	positive regulation of adaptive immune response	35/1285	120/18903	7.05e-14	3.52e-12	2.32e-12	PTPRC/HLA-DRA/HLA-DRB1/HLA-E/C3/HSPD1/IL18/IL1B/FCGR1A/HLA-B/CLEC7A/TREM2/NFKBID/SLC11A1/NLRP3/IL6ST/P2RX7/TGFB1/PYCARD/NFKBIZ/CD55/TNF/STX7/BTK/RIPK2/SIRT1/TFRC/ARID5A/TNFSF13B/JAK2/HLA-A/MALT1/AKIRIN2/PLA2G4A/ZBTB1	35
BP	GO:0030218	erythrocyte differentiation	35/1285	128/18903	5.81e-13	2.53e-11	1.67e-11	ID2/HCLS1/KLF2/HSPA1A/HSPA1B/RPS19/IKZF1/MAFB/LYN/INPP5D/RPS6/SPI1/ZFP36/NCKAP1L/RPS14/JMJD6/TAL1/ALAS1/DNASE2/SLC11A2/INHBA/PTPN2/PTBP3/PKNOX1/SH2B3/JAK2/HSPA9/KCNQ1/ZFP36L1/ARID4A/CITED2/CDK6/FOXO3/VEGFA/HIF1A	35
BP	GO:0097530	granulocyte migration	35/1285	158/18903	3.62e-10	9.82e-09	6.47e-09	CD74/CSF1R/CCL3/CCL4/ITGB2/CSF3R/IL1B/FCER1G/C3AR1/CCL3L1/PTGER4/PREX1/C5AR1/CCL3L3/NCKAP1L/SYK/CD300A/IL1A/RHOG/IL17RA/CCL5/CCL4L1/PDE4B/PIK3CG/VAV1/RAC2/TREM1/RAC1/EDN1/RHOH/CCL2/MPP1/CCL20/CSF1/ANXA1	35
BP	GO:0050864	regulation of B cell activation	35/1285	204/18903	3.48e-07	5.13e-06	3.38e-06	CD74/PTPRC/LAPTM5/TYROBP/ZFP36L2/ID2/SAMSN1/GPR183/TNFAIP3/CDKN1A/XBP1/LYN/INPP5D/IRS2/PELI1/TLR4/TGFB1/NCKAP1L/SYK/ATM/CD300A/BTK/INHBA/SLC39A10/THEMIS2/PTPN6/TFRC/TNFSF13B/TNFRSF13C/IL4I1/AKIRIN2/NFATC2/ZFP36L1/CARD11/MEF2C	35
BP	GO:0009612	response to mechanical stimulus	35/1285	211/18903	7.96e-07	1.09e-05	7.18e-06	NFKBIA/IL1B/BAG3/CXCR4/PTGER4/BTG2/FOSB/NFKB1/FOS/SLC8A1/TLR4/P2RX7/JUN/USP53/JUND/TNF/PTGS2/MAP3K2/TLR7/CASP1/PIEZO1/TNFRSF10B/TLR5/CXCL12/IRF1/CASP8/KCNQ1/TLR3/EDN1/MMP2/KCNJ2/STRBP/TNFSF14/CITED2/CSF1	35
BP	GO:0006959	humoral immune response	35/1285	320/18903	0.0037044	0.0163084	0.0107477	PTPRC/HLA-DRB1/CD83/C1QB/HLA-E/C3/C1QA/C1QC/IL1B/ST6GAL1/GPR183/HLA-DQB1/RPS19/RPL39/TREM2/SLC11A1/VSIG4/POU2F2/CD55/TNF/BLNK/RPL30/RNASE6/SPNS2/ALOX5/PTPN6/C2/FAU/HLA-A/EBI3/TREM1/LYZ/CCL2/CFD/MEF2C	35
BP	GO:0071346	cellular response to interferon-gamma	34/1285	118/18903	2.37e-13	1.11e-11	7.31e-12	CCL3/HLA-DPA1/AIF1/CCL4/IFNGR1/CCL3L1/IRF8/LGALS9/STX4/TLR4/TLR2/RPL13A/WAS/CCL3L3/TNF/SIRPA/ACTR3/GBP2/CASP1/ACTR2/IFNGR2/CCL5/HCK/CCL4L1/PTPN2/PARP14/JAK2/IRF1/TLR3/EDN1/WNT5A/CCL2/SOCS1/CCL20	34
BP	GO:0032609	interferon-gamma production	34/1285	119/18903	3.11e-13	1.4e-11	9.2e-12	LAPTM5/HLA-DRB1/HLA-DPA1/HSPD1/HAVCR2/HLA-DPB1/IL18/IL1B/LILRB4/CLEC7A/IRF8/LGALS9/SLC11A1/TLR4/PRNP/CD14/PYCARD/SLC7A5/TNF/SIRPA/ZC3H12A/TLR7/RIPK2/INHBA/LILRB1/ARID5A/PDE4B/DDIT3/JAK2/HLA-A/GAS6/EBI3/TLR3/WNT5A	34
BP	GO:0032649	regulation of interferon-gamma production	34/1285	119/18903	3.11e-13	1.4e-11	9.2e-12	LAPTM5/HLA-DRB1/HLA-DPA1/HSPD1/HAVCR2/HLA-DPB1/IL18/IL1B/LILRB4/CLEC7A/IRF8/LGALS9/SLC11A1/TLR4/PRNP/CD14/PYCARD/SLC7A5/TNF/SIRPA/ZC3H12A/TLR7/RIPK2/INHBA/LILRB1/ARID5A/PDE4B/DDIT3/JAK2/HLA-A/GAS6/EBI3/TLR3/WNT5A	34
BP	GO:0072676	lymphocyte migration	34/1285	124/18903	1.14e-12	4.73e-11	3.11e-11	CCL3/AIF1/CCL4/DOCK8/GPR183/CXCL16/CORO1A/CCL3L1/CH25H/PYCARD/ABL2/CCL3L3/ICAM1/PADI2/STK10/SPNS2/CCL5/CCL4L1/ADAM10/CXCL12/PIK3CG/WNK1/GAS6/ITGAL/OXSR1/JAM2/SLC8B1/SPN/WNT5A/CCL2/TNFSF14/ADAM17/CCL20/NEDD9	34
BP	GO:0002705	positive regulation of leukocyte mediated immunity	34/1285	140/18903	4.57e-11	1.45e-09	9.53e-10	PTPRC/HLA-DRA/HLA-DRB1/TYROBP/HLA-E/C3/HSPD1/ITGB2/IL18/IL1B/FCGR1A/HLA-B/CLEC7A/DDX21/TREM2/STX4/NLRP3/SPI1/PTAFR/P2RX7/TGFB1/CD55/TNF/ITGAM/STX7/BTK/TFRC/ARID5A/PLCG2/VAV1/HLA-A/MALT1/SCIMP/ZBTB1	34
BP	GO:0038061	NIK/NF-kappaB signaling	34/1285	142/18903	6.93e-11	2.09e-09	1.38e-09	REL/LAPTM5/NFKBIA/HAVCR2/IL18/IL1B/TREM2/LGALS9/LITAF/CD86/RPS3/NLRP3/SPI1/TLR4/TLR2/CD14/TNF/CYLD/ZC3H12A/NFKB2/TMSB4X/TLR7/TLR6/RASSF2/RELB/TNFRSF10B/BIRC3/LIMS1/MALT1/DDX3X/TLR3/EDN1/TNFSF14/PDCD4	34
BP	GO:2000377	regulation of reactive oxygen species metabolic process	34/1285	149/18903	2.78e-10	7.72e-09	5.09e-09	TYROBP/ITGB2/SOD2/CLEC7A/CDKN1A/STK17A/TLR4/PDGFB/TGFB1/GRB2/BCO2/TNF/SYK/ZC3H12A/ITGAM/HK2/SNCA/TLR6/PRKCD/GCH1/ALOX5/CFLAR/PLCG2/GNAI2/FOXO1/SLC25A33/NFE2L2/ARG2/RAC2/RAC1/CRYAB/COQ7/FOXO3/HIF1A	34
BP	GO:2001236	regulation of extrinsic apoptotic signaling pathway	34/1285	155/18903	8.49e-10	2.09e-08	1.38e-08	PTPRC/GPX1/SKIL/HSPA1A/IL1B/HSPA1B/STK4/HMOX1/PMAIP1/MCL1/TNFAIP3/STX4/G0S2/SERPINE1/PYCARD/ICAM1/TNF/IL1A/CYLD/IGF1/TGFBR1/ATF3/INHBA/DEDD2/TNFSF10/ARHGEF2/SIAH2/CFLAR/TNFRSF12A/DDX3X/TMC8/DEPTOR/ITPRIP/BID	34
BP	GO:0050728	negative regulation of inflammatory response	34/1285	184/18903	8.17e-08	1.36e-06	8.95e-07	PTPRC/HLA-DRB1/GPX1/RPS19/RHBDF2/TREM2/TNFAIP3/PTGER4/LYN/NLRP3/NFKB1/SIGLEC10/ZFP36/MIR142/KLF4/AOAH/SERPINF1/SIRPA/SYK/CYLD/TNFRSF1B/SOCS3/IGF1/GRN/PRKCD/ALOX5/METRNL/HCK/APOE/PTPN2/HAMP/PLK2/LDLR/DUSP10	34
BP	GO:0032271	regulation of protein polymerization	34/1285	201/18903	7.16e-07	9.98e-06	6.58e-06	HSP90AA1/HCLS1/HSPA1A/BIN1/HSPA1B/COTL1/CORO1A/NAV3/SCIN/RPS3/PYCARD/GRB2/NCKAP1L/CAPG/PDE4DIP/PAK1/ARPC3/TMSB10/ARPC2/CYFIP1/ARPC1B/TMSB4X/FKBP4/SNCA/ARHGAP18/PRKCD/HCK/BAIAP2/FMN1/FCHSD2/SNX9/RAC1/CAPZA1/SSH1	34
BP	GO:0042594	response to starvation	34/1285	211/18903	2.23e-06	2.77e-05	1.82e-05	PMAIP1/HSPA8/CDKN1A/KLF10/XBP1/IFI16/FOS/ZFP36/PLIN2/GABARAPL1/SLC7A5/UCP2/PRKAG2/SIK1/ZC3H12A/CPEB4/ATF3/HSPA5/GLUL/UPP1/SIRT1/MIOS/MAP3K5/DDIT3/HAMP/FOXO1/GAS6/NFE2L2/MAP1LC3B/DSC2/MFSD2A/ITFG2/FOXO3/PDK4	34
BP	GO:0016064	immunoglobulin mediated immune response	34/1285	215/18903	3.43e-06	4.01e-05	2.64e-05	CD74/PTPRC/HLA-DRA/HLA-DRB1/C1QB/HLA-E/C3/HLA-DPA1/C1QA/C1QC/HSPD1/HLA-DPB1/HLA-DQB1/FCER1G/FCGR1A/FCGR3A/HLA-DMA/TREM2/HLA-DQA1/HLA-DMB/INPP5D/TGFB1/HLA-DRB5/CD55/TNF/BTK/PRKCD/PTPN6/TFRC/SWAP70/ERCC1/C2/IRF7/HLA-DOA	34
BP	GO:0019724	B cell mediated immunity	34/1285	218/18903	4.69e-06	5.33e-05	3.51e-05	CD74/PTPRC/HLA-DRA/HLA-DRB1/C1QB/HLA-E/C3/HLA-DPA1/C1QA/C1QC/HSPD1/HLA-DPB1/HLA-DQB1/FCER1G/FCGR1A/FCGR3A/HLA-DMA/TREM2/HLA-DQA1/HLA-DMB/INPP5D/TGFB1/HLA-DRB5/CD55/TNF/BTK/PRKCD/PTPN6/TFRC/SWAP70/ERCC1/C2/IRF7/HLA-DOA	34
BP	GO:0051651	maintenance of location in cell	34/1285	226/18903	1.04e-05	0.000109196	7.2e-05	PTPRC/FTL/SRGN/CCL3/SORL1/CORO1A/SCIN/LYN/SLC8A1/P2RX7/GAA/ARHGAP21/CCDC88A/TMSB10/HK2/TMSB4X/CHD7/SNCA/HNRNPU/INSIG1/HSPA5/PTPN6/TRPM2/APOE/RYR1/RASA3/DDIT3/PLCG2/FTH1/UVRAG/HEXA/SLC8B1/GSTM2/ITPR2	34
BP	GO:0009743	response to carbohydrate	34/1285	234/18903	2.2e-05	0.000209873	0.000138312	HLA-DRB1/GPX1/SOD2/IL1B/CLEC7A/TREM2/SLC2A5/STX4/XBP1/LYN/IRS2/SLC8A1/ICAM1/MAP2K3/TRA2B/UCP2/TNF/SERPINF1/IL1A/PTGS2/NCF1/GLUL/MLXIPL/PIM3/ERN1/ERCC1/PIH1D1/GAS6/PPP3CA/ZFP36L1/EGR1/FOXO3/KLF7/HIF1A	34
BP	GO:0034764	positive regulation of transmembrane transport	34/1285	237/18903	2.88e-05	0.000262027	0.000172683	C3/CTSS/MEF2A/TREM2/NR4A3/IRS2/ATP1B1/ADRB2/PTAFR/P2RX7/SLC7A5/NDUFA4/ACSL1/GLRX/IGF1/ARL6IP1/TMSB4X/P2RX4/SNCA/IFNGR2/CACNB4/AZIN1/PLCG2/WNK1/NFE2L2/KCNQ1/KCNMB1/PPP3CA/PIK3R1/GSTM2/EDN1/KCNJ2/CCL2/VMP1	34
BP	GO:0042593	glucose homeostasis	34/1285	248/18903	7.31e-05	0.000587223	0.000386998	HLA-DRB1/GPX1/TREM2/STX4/XBP1/CEBPA/RPS6/IRS2/ICAM1/TRA2B/UCP2/SERPINF1/HK2/NCF1/SIRT1/ALOX5/MLXIPL/PIM3/ERN1/PTPN2/PYGL/PIH1D1/FOXO1/APPL2/GAS6/PPP3CA/PIK3R1/SLC8B1/FOXO3/SLC16A1/PDK4/KLF7/SUCNR1/HIF1A	34
BP	GO:0033500	carbohydrate homeostasis	34/1285	249/18903	7.93e-05	0.000629469	0.000414839	HLA-DRB1/GPX1/TREM2/STX4/XBP1/CEBPA/RPS6/IRS2/ICAM1/TRA2B/UCP2/SERPINF1/HK2/NCF1/SIRT1/ALOX5/MLXIPL/PIM3/ERN1/PTPN2/PYGL/PIH1D1/FOXO1/APPL2/GAS6/PPP3CA/PIK3R1/SLC8B1/FOXO3/SLC16A1/PDK4/KLF7/SUCNR1/HIF1A	34
BP	GO:0090257	regulation of muscle system process	34/1285	256/18903	0.000137235	0.00100465	0.000662097	HSP90AA1/RGS2/AIF1/MEF2A/BIN1/DOCK4/NR4A1/NR4A3/SLC8A1/ATP1B1/ADRB2/IL6ST/PTAFR/ATP1A1/TNFRSF1B/ZC3H12A/PTGS2/IGF1/P2RX4/ATP2B1/SMAD7/PDE4B/KCNMA1/HAMP/PIK3CG/FOXO1/KCNQ1/PPP3CA/DSC2/GSTM2/EDN1/KCNJ2/PRKCA/FOXO3	34
BP	GO:0050708	regulation of protein secretion	34/1285	257/18903	0.000148069	0.0010771	0.00070984	HLA-DRB1/IL1B/RHBDF2/TREM2/SERP1/STX4/FRMD4A/IRS2/TLR4/TLR2/P2RX7/TGFB1/UCP2/TNF/IL1A/MIDN/RAB11FIP1/IGF1/CCL5/GLUL/ALOX5/TRPM2/APOE/PIM3/JAK2/FOXO1/ICA1/CD33/PPP3CA/SLC8B1/ABCG1/SLC16A1/KLF7/HIF1A	34
BP	GO:0042886	amide transport	34/1285	296/18903	0.0019008	0.00940076	0.00619538	CD74/HLA-DRB1/IL1B/SERP1/STX4/IRS2/FOLR2/UCP2/TNF/PSAP/MIDN/ABCC4/CHD7/SLC15A2/CCL5/GLUL/ALOX5/TRPM2/PIM3/IL1RN/SLC15A3/JAK2/FOXO1/ICA1/PPP3CA/SLC8B1/EDN1/RAB1A/SLC16A1/KLF7/ABCG2/HIF1A/ABCA1/ANXA1	34
BP	GO:0060562	epithelial tube morphogenesis	34/1285	335/18903	0.0126589	0.0447267	0.0294762	CSF1R/STK4/ITGAX/CXCR4/CTSH/CTSZ/GNA13/TGFB1/TNF/PAK1/MTHFD1L/FMN1/SPINT2/APAF1/MYC/LUZP1/SALL1/SKI/KRAS/EDN1/WNT5A/PRKACB/CITED2/MTHFR/GZF1/PROX1/CSF1/RHOB/SETDB2/MEF2C/VEGFA/SPRY2/HIF1A/NRARP	34
BP	GO:1990778	protein localization to cell periphery	34/1285	337/18903	0.0137512	0.0481458	0.0317295	RHBDF2/TREM2/STX4/RILPL2/ATP1B1/PRNP/ATP2C1/TGFB1/TNF/CCDC88A/EHD4/STX7/RHOG/VAMP8/EPB41/ABI3/RAB31/EPB41L2/ADAM10/RAMP1/DAB2/GAS6/GAK/GGA2/RAPGEF6/EPB41L3/TSPAN14/PIK3R1/PICALM/S100A10/GOLGA4/SQSTM1/TTC7A/PRKCH	34
BP	GO:0002275	myeloid cell activation involved in immune response	33/1285	96/18903	1.74e-15	1.12e-13	7.39e-14	TYROBP/CCL3/ITGB2/HAVCR2/FCER1G/CD84/HMOX1/CX3CR1/TREM2/NR4A3/LGALS9/STX4/LYN/SPI1/LAT2/DOCK2/PTAFR/PYCARD/SNAP23/SYK/CD300A/ITGAM/VAMP8/BTK/GRN/PTPN6/STXBP2/PLCG2/PIK3CG/RAC2/GAB2/MILR1/SUCNR1	33
BP	GO:1903557	positive regulation of tumor necrosis factor superfamily cytokine production	33/1285	109/18903	1.12e-13	5.56e-12	3.66e-12	PTPRC/TYROBP/HLA-E/CCL3/HAVCR2/CYBB/CD84/FCGR3A/CLEC7A/IFNGR1/LGALS9/CD86/TLR4/TLR2/CD14/PTAFR/PYCARD/SYK/IL1A/TLR1/LY96/BTK/RIPK2/PTPRJ/ARID5A/TMEM106A/ARHGEF2/PLCG2/JAK2/PIK3R1/TLR3/SPN/WNT5A	33
BP	GO:0002286	T cell activation involved in immune response	33/1285	118/18903	1.34e-12	5.39e-11	3.56e-11	CD74/HLA-DRA/HLA-DRB1/APBB1IP/HAVCR2/JUNB/IL18/LCP1/GPR183/FCER1G/NFKBID/PTGER4/LGALS9/SLC11A1/HLA-DMB/FGL2/CD86/RPS6/NLRP3/NFKBIZ/NCKAP1L/ICAM1/ZC3H12A/IL6R/RELB/RIPK2/LILRB1/SMAD7/MALT1/ITGAL/SPN/HLX/ANXA1	33
BP	GO:0045621	positive regulation of lymphocyte differentiation	33/1285	130/18903	2.44e-11	8.32e-10	5.49e-10	CD74/PTPRC/HLA-DRA/HLA-DRB1/CD83/IL18/LILRB4/EGR3/RUNX1/NFKBID/LGALS9/XBP1/CD86/INPP5D/NLRP3/NFKBIZ/NCKAP1L/SYK/PNP/BTK/RIPK2/GAS6/MALT1/IL4I1/RHOH/DUSP10/ZBTB1/SOCS1/FOXO3/HLX/RUNX3/TNFSF9/ANXA1	33
BP	GO:0002702	positive regulation of production of molecular mediator of immune response	33/1285	133/18903	4.74e-11	1.49e-09	9.84e-10	CD74/PTPRC/LAPTM5/HLA-E/IL18/IL1B/CLEC7A/DDX21/NR4A3/STX4/XBP1/CD86/NLRP3/TLR4/P2RX7/TGFB1/PYCARD/CD55/SLC7A5/SYK/BTK/TLR7/RIPK2/LILRB1/SIRT1/TFRC/ARID5A/PLCG2/HLA-A/MALT1/SCIMP/TLR3/WNT5A	33
BP	GO:1903038	negative regulation of leukocyte cell-cell adhesion	33/1285	147/18903	7.97e-10	1.98e-08	1.3e-08	CD74/LAPTM5/HLA-DRB1/HAVCR2/LILRB4/SOCS6/RUNX1/LGALS9/VSIG4/FGL2/CD86/PELI1/PRNP/KLF4/NCKAP1L/CD300A/ZC3H12A/LILRB1/PTPN6/SMAD7/CEBPB/PTPN2/CXCL12/IRF1/WNK1/ARG2/IL4I1/SPN/SOCS1/HLX/RUNX3/NRARP/ANXA1	33
BP	GO:0008360	regulation of cell shape	33/1285	154/18903	2.82e-09	6.21e-08	4.09e-08	CSF1R/CCL3/ITGB2/LST1/PLEKHO1/CORO1A/FMNL1/GNA13/FGD2/SEMA4D/FMNL2/CYFIP1/RHOG/FGD4/PDPN/ARHGAP18/EPB41/ARHGAP15/FMNL3/HCK/BAIAP2/CDC42SE1/PRPF40A/EPB41L3/RAC2/RAC1/CDC42SE2/RHOH/CCL2/ARAP1/RHOB/VEGFA/ANXA1	33
BP	GO:0010634	positive regulation of epithelial cell migration	33/1285	176/18903	8.81e-08	1.46e-06	9.62e-07	HMOX1/CTSH/LGMN/IRS2/RIN2/PDGFB/TGFB1/JUN/MAP4K4/MAP2K3/ZC3H12A/PTGS2/HDAC9/TMSB4X/P2RX4/MIR29A/GRN/SIRT1/PLCG2/PIK3CG/PLK2/NFE2L2/RAC1/EDN1/WNT5A/PRKCA/HBEGF/PROX1/ADAM17/RHOB/VEGFA/HIF1A/ANXA1	33
BP	GO:0032869	cellular response to insulin stimulus	33/1285	208/18903	4.42e-06	5.07e-05	3.34e-05	SORL1/PTPRE/IL1B/XBP1/IRS2/PDE3B/LPIN2/GRB2/UCP2/SYAP1/SOCS3/CYFIP1/HDAC9/INSIG1/PRKCD/ATP2B1/SIRT1/SNX5/RAB31/BAIAP2/PTPN2/CFLAR/GNAI2/FOXO1/APPL2/SLC25A33/PIK3R1/TBC1D4/ZFP36L1/NDEL1/SOCS1/PDK4/PIP4K2A	33
BP	GO:0050821	protein stabilization	33/1285	214/18903	8.23e-06	8.89e-05	5.86e-05	TYROBP/HSP90AA1/HSPD1/HSPA1A/HSP90AB1/HSPA1B/STK4/BAG3/IFI30/ATP1B1/MFSD1/NPM1/CCNH/RPL23/RPL11/TCP1/USP36/IGF1/GNAQ/RASSF2/GRN/PRKCD/SMAD7/CCT4/RPL5/GTPBP4/PIH1D1/PTGES3/VHL/FBXW7/PIK3R1/CRYAB/PIM1	33
BP	GO:0043491	protein kinase B signaling	33/1285	218/18903	1.23e-05	0.000126387	8.33e-05	GPX1/CCL3/HSP90AA1/HCLS1/IL18/IL1B/HSP90AB1/PLK3/CX3CR1/ARRB2/P2RY12/TGFB1/TNF/OSM/IGF1/P2RX4/TGFBR1/MIR29A/CCL5/SIRT1/PTPRJ/MERTK/DDIT3/SH2B3/PIK3CG/GAS6/PIK3R5/ZFP36L1/CCL2/HBEGF/SETX/GCNT2/SPRY2	33
BP	GO:0030522	intracellular receptor signaling pathway	33/1285	266/18903	0.000596304	0.00353877	0.00233215	KLF2/NFKBIA/NR4A2/HSPA1A/HSPA1B/DNAJA1/NR4A1/TNFAIP3/NR4A3/TLR4/YWHAH/DDX5/CYLD/PAK1/PADI2/USP15/FKBP4/SLC15A2/RIPK2/RNF125/SIRT1/DHRS3/BIRC3/SLC15A3/PTGES3/DAB2/IRF7/JAK2/EZH2/OASL/ALPK1/PIM1/CITED2	33
BP	GO:0051962	positive regulation of nervous system development	33/1285	279/18903	0.00135623	0.00709058	0.0046729	SKIL/ID2/IL1B/BIN1/CX3CR1/CXCR4/LYN/MIR142/TLR2/IL6ST/TGFB1/SEMA4D/SLC7A5/EGR2/TNF/SERPINF1/TIAM1/TNFRSF1B/CYFIP1/SYNDIG1/ACTR2/GRID2/IL1RAP/BAIAP2/CXCL12/KRAS/NDEL1/PLAG1/GOLGA4/PRKCH/RHEB/VEGFA/HIF1A	33
BP	GO:0046942	carboxylic acid transport	33/1285	290/18903	0.00255401	0.0120392	0.00793416	RGS2/SLCO2B1/IL1B/SLC11A1/FOLR2/P2RX7/SLC7A5/SLC1A5/TNF/SYK/SLC16A3/PSAP/IL1A/EMB/PTGS2/ABCC4/CLN8/SLC43A2/ARL6IP1/P2RX4/SNCA/CACNB4/SLC7A7/SLC7A8/SLC25A29/PLA2G4A/EDN1/MFSD12/SLC3A2/SLC16A1/PNPLA8/ABCG2/ANXA1	33
BP	GO:0072503	cellular divalent inorganic cation homeostasis	33/1285	323/18903	0.0126781	0.0447672	0.0295029	PTPRC/CCL3/TPT1/CORO1A/SLC11A1/LYN/SLC8A1/ATP1B1/ATP2C1/P2RX7/HERPUD1/CCR1/CHD7/SNCA/CCL5/SLC39A10/ATP2B1/ATP13A3/PTPN6/TRPM2/APOE/RYR1/RASA3/CXCL12/DDIT3/PLCG2/SLC30A1/SLC8B1/GSTM2/EDN1/WNT5A/ITPR2/MT1X	33
BP	GO:0002690	positive regulation of leukocyte chemotaxis	32/1285	97/18903	1.77e-14	1e-12	6.62e-13	CD74/CSF1R/CCL3/AIF1/CCL4/C3AR1/CX3CR1/LGALS9/LGMN/C5AR1/SPI1/SERPINE1/NCKAP1L/CCR1/IL6R/CCL5/SWAP70/ADAM10/CXCL12/WNK1/GPSM3/GAS6/OXSR1/RAC2/RAC1/EDN1/WNT5A/TNFSF14/ADAM17/NEDD9/CSF1/VEGFA	32
BP	GO:0032602	chemokine production	32/1285	99/18903	3.4e-14	1.81e-12	1.19e-12	CD74/CSF1R/AIF1/HAVCR2/IL18/IL1B/CD84/HMOX1/LILRB4/CLEC7A/TREM2/LGALS9/MBP/TLR4/TLR2/KLF4/PYCARD/TNF/SIRPA/SYK/IL6R/IL17RA/TLR7/RIPK2/DDX3X/ARG2/TREM1/TLR3/EGR1/WNT5A/ADAM17/HIF1A	32
BP	GO:0032760	positive regulation of tumor necrosis factor production	32/1285	105/18903	2.15e-13	1.03e-11	6.76e-12	PTPRC/TYROBP/HLA-E/CCL3/HAVCR2/CYBB/CD84/FCGR3A/CLEC7A/IFNGR1/LGALS9/TLR4/TLR2/CD14/PTAFR/PYCARD/SYK/IL1A/TLR1/LY96/BTK/RIPK2/PTPRJ/ARID5A/TMEM106A/ARHGEF2/PLCG2/JAK2/PIK3R1/TLR3/SPN/WNT5A	32
BP	GO:0002444	myeloid leukocyte mediated immunity	32/1285	107/18903	3.85e-13	1.72e-11	1.13e-11	TYROBP/HLA-E/C3/CCL3/ITGB2/CD84/HMOX1/FCGR1A/FCGR3A/CX3CR1/DDX21/SERPINB9/NR4A3/LGALS9/STX4/LYN/SPI1/LAT2/PTAFR/SNAP23/SYK/CD300A/ITGAM/VAMP8/BTK/STXBP2/PIK3CG/RAC2/TREM1/GAB2/MILR1/ADAM17	32
BP	GO:0032611	interleukin-1 beta production	32/1285	111/18903	1.18e-12	4.81e-11	3.17e-11	TYROBP/CCL3/LILRB4/CLEC7A/CX3CR1/TREM2/ARRB2/TNFAIP3/LGALS9/IFI16/NLRP3/TLR4/P2RX7/PYCARD/NAIP/TNF/SIRPA/ZC3H12A/IGF1/TLR6/CASP1/RIPK2/CARD8/TMEM106A/JAK2/NLRP1/MALT1/CASP8/ARG2/CD33/EGR1/WNT5A	32
BP	GO:0032651	regulation of interleukin-1 beta production	32/1285	111/18903	1.18e-12	4.81e-11	3.17e-11	TYROBP/CCL3/LILRB4/CLEC7A/CX3CR1/TREM2/ARRB2/TNFAIP3/LGALS9/IFI16/NLRP3/TLR4/P2RX7/PYCARD/NAIP/TNF/SIRPA/ZC3H12A/IGF1/TLR6/CASP1/RIPK2/CARD8/TMEM106A/JAK2/NLRP1/MALT1/CASP8/ARG2/CD33/EGR1/WNT5A	32
BP	GO:2001235	positive regulation of apoptotic signaling pathway	32/1285	135/18903	3.3e-10	9.07e-09	5.98e-09	PTPRC/SKIL/CTSC/STK4/PMAIP1/MCL1/CTSH/RPS3/G0S2/PYCARD/RPL11/UBB/TNF/RPL26/CYLD/SFPQ/TGFBR1/ATF3/PRKCD/INHBA/DEDD2/SIRT1/TNFSF10/APAF1/PTPN2/MYC/DDIT3/JAK2/TNFRSF12A/FBXW7/BID/BCL2L11	32
BP	GO:2001056	positive regulation of cysteine-type endopeptidase activity	32/1285	143/18903	1.56e-09	3.66e-08	2.41e-08	LAPTM5/HSPD1/HSPE1/CLEC7A/PMAIP1/CTSH/LGALS9/IFI16/LGMN/RPS3/NLRP3/PYCARD/TNF/SYK/SNCA/CASP1/RIPK2/SIRT1/TNFSF10/CARD8/APAF1/MAP3K5/MYC/CFLAR/CASP10/JAK2/NLRP1/MALT1/CASP8/DDX3X/BID/BCL2L11	32
BP	GO:0001659	temperature homeostasis	32/1285	178/18903	3.73e-07	5.45e-06	3.59e-06	GPX1/IL18/IL1B/CXCR4/KDM6B/TLR4/G0S2/ADRB2/GATM/UCP2/TNF/SYK/IL1A/ACSL1/ARRDC3/PTGS2/TRPM2/CEBPB/DDIT3/JAK2/FOXO1/APPL2/TLE3/EGR1/GNAS/SQSTM1/PLCL2/SCD/ADAM17/RHEB/GADD45G/VEGFA	32
BP	GO:0043433	negative regulation of DNA-binding transcription factor activity	32/1285	190/18903	1.66e-06	2.11e-05	1.39e-05	ID2/NFKBIA/HAVCR2/ADORA3/HMOX1/ARRB2/TNFAIP3/NLRP3/SPI1/PELI1/PRNP/KLF4/PYCARD/TRIB1/IRAK2/NFKBIE/CYLD/SIK1/ZC3H12A/TMSB4X/SIRT1/SMAD7/CARD8/BHLHE40/IRAK3/DDIT3/EZH2/GAS6/NFKBIB/PIM1/PROX1/HES6	32
BP	GO:0070302	regulation of stress-activated protein kinase signaling cascade	32/1285	198/18903	4.12e-06	4.74e-05	3.12e-05	DUSP1/IL1B/DNAJA1/GADD45B/TREM2/LYN/SPI1/TLR4/PYCARD/MAP4K4/NAIP/SDCBP/TNF/SIRPA/IL1A/CYLD/TAOK3/ZC3H12A/RASSF2/NCF1/RIPK2/MAP3K5/MYC/FOXO1/SCIMP/TLR3/WNT5A/DUSP10/PDCD4/MAP3K11/GADD45G/VEGFA	32
BP	GO:0019722	calcium-mediated signaling	32/1285	208/18903	1.18e-05	0.000121806	8.03e-05	PTPRC/CCL3/CCL4/PLEK/FCGR3A/CLEC7A/CX3CR1/TREM2/CXCR4/P2RY12/SLC8A1/ATP1B1/LAT2/PRNP/P2RX7/CCR1/TNF/SYK/IGF1/P2RX4/BTK/PTPRJ/TRPM2/HOMER3/NFATC1/CCRL2/PLCG2/PPP3CA/NFATC2/GSTM2/EDN1/CCL20	32
BP	GO:0045732	positive regulation of protein catabolic process	32/1285	209/18903	1.3e-05	0.000132124	8.71e-05	SORL1/HSP90AA1/HSPA1A/IL1B/HSPA1B/ZFAND2A/PLK3/TREM2/TNFAIP3/CEBPA/TRIB1/HERPUD1/TNF/OAZ1/TNFRSF1B/SMAD7/APOE/CSNK1D/MYLIP/DAB2/HAMP/SNX9/PLK2/FOXO1/NFE2L2/RNF144B/FBXW7/LDLR/ARIH1/MDM2/WNT5A/RNF19A	32
BP	GO:0050679	positive regulation of epithelial cell proliferation	32/1285	224/18903	5.31e-05	0.000455295	0.000300053	NEAT1/HMOX1/EGR3/HTRA1/NR4A1/TNFAIP3/NR4A3/B4GALT1/XBP1/C5AR1/IRS2/PDGFB/JUN/TNF/IGF1/BTK/TGFBR1/MIR29A/GRN/GLUL/SIRT1/CXCL12/MYC/CFLAR/WNT5A/PRKCA/PROX1/ADAM17/HLX/VEGFA/HIF1A/NRARP	32
BP	GO:0071241	cellular response to inorganic substance	32/1285	229/18903	8.16e-05	0.000643933	0.000424371	MEF2A/JUNB/CYBB/HMOX1/ALOX5AP/FOSB/LGMN/CEBPA/FOS/PRNP/JUN/JUND/SERPINF1/EIF4A3/PPIF/ADCY7/PTGS2/P2RX4/SNCA/NCF1/HSPA5/TRPM2/RYR1/CFLAR/PLCG2/FOXO1/NFE2L2/SYT6/EDN1/WNT5A/MT1X/MEF2C	32
BP	GO:0000082	G1/S transition of mitotic cell cycle	32/1285	250/18903	0.000414851	0.00261162	0.00172114	AIF1/ID2/PLK3/CDKN1A/EIF4E/RPS6/CCNH/KLF4/RPL26/ATM/MIR29A/INHBA/CACNB4/PTPN6/BCAT1/GSPT1/MYC/PLK2/APPL2/EZH2/CACUL1/DDX3X/GPR132/PPP3CA/DBF4/MDM2/CCL2/CDK6/ADAM17/BID/RBBP8/ANXA1	32
BP	GO:0098657	import into cell	32/1285	252/18903	0.000477571	0.00291776	0.00192289	RGS2/IL10RA/TREM2/SLC2A5/IRS2/SLC8A1/ATP1B1/FOLR2/PRNP/ATP1A1/SLC7A5/SLC1A5/TNF/ACSL1/CLN8/SLC43A2/ARL6IP1/SLC9A9/SNCA/SLC11A2/SLC15A2/SLC39A10/TRPM2/SLC15A3/SLC7A8/WNK1/SLC30A1/KCNQ1/PPP3CA/KCNJ2/CACNA1A/SLC3A2	32
BP	GO:0097305	response to alcohol	32/1285	253/18903	0.000511966	0.00310175	0.00204415	CCL3/SGK1/RGS2/KLF2/SOD2/CYBB/ST6GAL1/TBXAS1/PTGER4/FOSB/FOS/CD14/TGFB1/RPLP0/RGS19/TNF/ADCY7/RPL27/RPS4X/TGFBR1/ACTR2/INHBA/ATP2B1/RPL15/HAMP/CASP8/KCNMB1/GNG2/POLB/ITPR2/RPL10A/FOXO3	32
BP	GO:0003015	heart process	32/1285	261/18903	0.000875529	0.0049094	0.00323544	GPX1/HSP90AA1/RGS2/MEF2A/BIN1/CELF2/ADORA3/CXCR4/SLC8A1/ATP1B1/ATP1A1/GAA/MAP2K3/TNF/ZC3H12A/AKAP13/P2RX4/ATP2B1/GCH1/SCN1B/SMAD7/PDE4B/JAK2/PIK3CG/GNAI2/KCNQ1/DSC2/GSTM2/EDN1/KCNJ2/MDM2/HBEGF	32
BP	GO:0006470	protein dephosphorylation	32/1285	261/18903	0.000875529	0.0049094	0.00323544	PTPRC/DUSP1/PTPRE/HSP90AB1/PPP1R15A/DUSP2/PPP1R15B/PTP4A1/TGFB1/CTTNBP2NL/NCKAP1L/TNF/CD300A/PRKCD/SLC39A10/PTPN6/PTPRJ/SWAP70/PTPN2/DUSP4/DUSP6/JAK2/GNAI2/DAPP1/CD33/PPP3CA/PTP4A2/DUSP28/SSH1/DUSP10/PPP2R5C/DUSP5	32
BP	GO:0045927	positive regulation of growth	32/1285	261/18903	0.000875529	0.0049094	0.00323544	CXCL16/CXCR4/SERP1/SEMA4D/SDCBP/BASP1/CYFIP1/IGF1/CHD7/TGFBR1/RPS6KA1/SMAD7/RPS6KA3/ADAM10/CXCL12/HAMP/ITSN2/SLC25A33/DDX3X/NDEL1/MFSD2A/EDN1/GOLGA4/HBEGF/PIM1/CDKN2AIP/PROX1/ADAM17/CSF1/HLX/MEF2C/VEGFA	32
BP	GO:0016072	rRNA metabolic process	32/1285	268/18903	0.00136205	0.00711458	0.00468872	RPS19/RPS24/DDX21/RPS6/RPS14/RPL11/RPS21/RPL26/EIF4A3/RPS8/RPL27/NAF1/USP36/CHD7/RPS16/DEDD2/RPS28/RPL14/RPL5/GTPBP4/PIH1D1/NOP58/RRP12/RPS27/RPS15/UTP6/TCOF1/RPL10A/DDX27/RPS25/NOP56/ISG20	32
BP	GO:0001894	tissue homeostasis	32/1285	275/18903	0.00206826	0.0100686	0.00663553	CSF1R/SPP1/CORO1A/TNFAIP3/CTSH/MBP/INPP5D/TLR4/ADRB2/P2RX7/TMEM119/SYK/PTGS2/HOMER1/CLN8/P2RX4/TPP1/LRRK1/LIPA/TFRC/CYTL1/HAMP/SNX10/KRAS/JAM2/MFSD2A/LYZ/PRKCA/PDK4/CSF1/GCNT2/VEGFA	32
BP	GO:0006401	RNA catabolic process	32/1285	299/18903	0.00733596	0.0285271	0.0188002	RNASET2/PABPC1/ZFP36L2/HSPA1A/HSPA1B/SLC11A1/BTG2/PABPC4/NPM1/ZFP36/EIF4A3/DDX5/ATM/TNFRSF1B/ZC3H12A/ETF1/NAF1/RNASE6/HNRNPC/HNRNPU/ZC3HAV1/PRKCD/DEDD2/ERN1/GSPT1/DCP2/RBM38/YTHDF3/ZFP36L1/PRKCA/KCNQ1OT1/ISG20	32
BP	GO:0048608	reproductive structure development	32/1285	306/18903	0.0101573	0.037297	0.0245798	C3/ARRB2/UBB/BASP1/SERPINF1/ATM/PSAP/IL1A/CHD7/FKBP4/TGFBR1/HSPA5/INHBA/SIRT1/MERTK/CEBPB/TNFSF10/ERCC1/NRIP1/SALL1/TLR3/PLAG1/MMP2/WNT5A/ARID4A/CITED2/FOXO3/MMP19/BCL2L11/IDH1/VEGFA/ANXA1	32
BP	GO:1903311	regulation of mRNA metabolic process	32/1285	309/18903	0.0116126	0.0421867	0.0278023	PABPC1/ZFP36L2/CELF2/HSPA8/SLC11A1/BTG2/PABPC4/NPM1/ZFP36/KHDRBS3/TRA2B/EIF4A3/DDX5/ZC3H12A/JMJD6/HNRNPC/TRA2A/HNRNPU/ZC3HAV1/PRKCD/DCP2/RBM38/YTHDF3/SRSF2/ZFP36L1/PRKCA/YTHDC1/MBNL1/CDK11A/SRSF7/QKI/HNRNPA2B1	32
BP	GO:0061458	reproductive system development	32/1285	310/18903	0.0121339	0.04341	0.0286084	C3/ARRB2/UBB/BASP1/SERPINF1/ATM/PSAP/IL1A/CHD7/FKBP4/TGFBR1/HSPA5/INHBA/SIRT1/MERTK/CEBPB/TNFSF10/ERCC1/NRIP1/SALL1/TLR3/PLAG1/MMP2/WNT5A/ARID4A/CITED2/FOXO3/MMP19/BCL2L11/IDH1/VEGFA/ANXA1	32
BP	GO:0050890	cognition	32/1285	314/18903	0.0144129	0.0497415	0.0327811	HLA-DRA/SGK1/CX3CR1/TREM2/BTG2/LGMN/C5AR1/FOS/TLR2/PRNP/GATM/EGR2/TNF/SERPINF1/EIF4A3/PTGS2/CYFIP1/CLN8/CHD7/SLC11A2/ACTR2/APOE/CEBPB/ITGA5/PLK2/KRAS/LDLR/PICALM/MFSD2A/NEDD9/MEF2C/HIF1A	32
BP	GO:0032642	regulation of chemokine production	31/1285	98/18903	1.65e-13	8.13e-12	5.36e-12	CD74/CSF1R/AIF1/HAVCR2/IL18/IL1B/CD84/HMOX1/LILRB4/CLEC7A/TREM2/LGALS9/MBP/TLR4/TLR2/KLF4/PYCARD/TNF/SIRPA/SYK/IL6R/IL17RA/TLR7/RIPK2/DDX3X/ARG2/TLR3/EGR1/WNT5A/ADAM17/HIF1A	31
BP	GO:0002824	positive regulation of adaptive immune response based on somatic recombination of immune receptors built from immunoglobulin superfamily domains	31/1285	114/18903	1.43e-11	5.1e-10	3.36e-10	PTPRC/HLA-DRA/HLA-DRB1/HLA-E/C3/HSPD1/IL18/IL1B/FCGR1A/HLA-B/CLEC7A/TREM2/NFKBID/SLC11A1/NLRP3/P2RX7/TGFB1/NFKBIZ/CD55/TNF/STX7/BTK/RIPK2/TFRC/ARID5A/TNFSF13B/JAK2/HLA-A/MALT1/PLA2G4A/ZBTB1	31
BP	GO:0002698	negative regulation of immune effector process	31/1285	122/18903	9.5e-11	2.8e-09	1.84e-09	PTPRC/HLA-E/HAVCR2/CD84/HMOX1/RPS19/HLA-B/LILRB4/CX3CR1/SERPINB9/ARRB2/LGALS9/VSIG4/FGL2/SPI1/TGFB1/CD55/NCKAP1L/TNF/CD300A/ZC3H12A/GRN/LILRB1/PTPN6/SMAD7/IRAK3/HLA-A/IL4I1/DUSP10/HLX/ANXA1	31
BP	GO:0001909	leukocyte mediated cytotoxicity	31/1285	134/18903	1.18e-09	2.87e-08	1.89e-08	PTPRC/HLA-DRA/HLA-DRB1/TYROBP/HLA-E/HAVCR2/IL18/CTSC/FCGR1A/HLA-B/FCGR3A/CX3CR1/CORO1A/SERPINB9/ARRB2/CTSH/LGALS9/SPI1/P2RX7/NCKAP1L/ICAM1/ITGAM/STX7/LILRB1/PTPN6/STXBP2/VAV1/HLA-A/LYST/TREM1/TUBB4B	31
BP	GO:0070555	response to interleukin-1	31/1285	141/18903	4.41e-09	9.3e-08	6.13e-08	CCL3/KLF2/CCL4/IL1B/CCL3L1/LGALS9/NFKB1/MIR142/PYCARD/CCL3L3/IRAK2/SIRPA/GBP2/ZC3H12A/SNCA/CCL5/RIPK2/CEBPB/CCL4L1/IL1RN/IRAK3/TANK/EDN1/MMP2/EGR1/CCL2/PRKCA/MTHFR/CCL20/HIF1A/ANXA1	31
BP	GO:0051092	positive regulation of NF-kappaB transcription factor activity	31/1285	154/18903	3.97e-08	7.08e-07	4.67e-07	HSPA1A/IL18/IL1B/HSPA1B/CLEC7A/CX3CR1/LGALS9/RPS3/NLRP3/TLR4/NPM1/TLR2/PYCARD/IRAK2/TNF/TRIM38/BTK/TLR6/RIPK2/IL1RAP/TFRC/ARHGEF2/IRAK3/CFLAR/PLCG2/TRIM22/MALT1/TLR3/CARD11/WNT5A/PRKCH	31
BP	GO:0030041	actin filament polymerization	31/1285	170/18903	4.08e-07	5.93e-06	3.91e-06	AIF1/HCLS1/BIN1/COTL1/CORO1A/SCIN/PREX1/PYCARD/WAS/GRB2/NCKAP1L/CAPG/ARPC3/TMSB10/ARPC2/CYFIP1/ARPC1B/TMSB4X/ARHGAP18/PRKCD/HCK/BAIAP2/FMN1/DIAPH2/FCHSD2/JAK2/SNX9/CORO7/RAC1/CAPZA1/SSH1	31
BP	GO:0009267	cellular response to starvation	31/1285	175/18903	7.88e-07	1.08e-05	7.13e-06	PMAIP1/HSPA8/CDKN1A/KLF10/XBP1/IFI16/FOS/PLIN2/GABARAPL1/SLC7A5/UCP2/PRKAG2/SIK1/ZC3H12A/CPEB4/ATF3/HSPA5/GLUL/UPP1/SIRT1/MIOS/MAP3K5/FOXO1/GAS6/NFE2L2/MAP1LC3B/DSC2/MFSD2A/ITFG2/FOXO3/PDK4	31
BP	GO:1902905	positive regulation of supramolecular fiber organization	31/1285	176/18903	8.95e-07	1.2e-05	7.92e-06	GPX1/HSPA1A/PLEK/BIN1/HSPA1B/NAV3/SCIN/RPS3/PYCARD/WAS/GRB2/NCKAP1L/PDE4DIP/CCDC88A/PAK1/ARPC2/CYFIP1/TGFBR1/HCK/BAIAP2/APOE/SWAP70/FMN1/FCHSD2/SNX9/RAC1/EDN1/GPR65/S100A10/COLGALT1/PROX1	31
BP	GO:0048659	smooth muscle cell proliferation	31/1285	179/18903	1.3e-06	1.69e-05	1.12e-05	AIF1/ID2/SOD2/IL18/HMOX1/TNFAIP3/CDKN1A/NR4A3/TLR4/PDGFB/PTAFR/GNA13/TGFB1/TRIB1/JUN/TNF/IL6R/PTGS2/IGF1/CCL5/APOE/ERN1/MAP3K5/DDIT3/JAK2/GNAI2/EDN1/MMP2/HBEGF/PDCD4/MEF2C	31
BP	GO:0045766	positive regulation of angiogenesis	31/1285	187/18903	3.38e-06	3.96e-05	2.61e-05	C3/CYBB/IL1B/HMOX1/ITGAX/C3AR1/CX3CR1/RUNX1/CXCR4/CTSH/XBP1/C5AR1/SERPINE1/NINJ1/KLF4/IL1A/ZC3H12A/HK2/MIR29A/GRN/SIRT1/ITGA5/TMIGD2/NFE2L2/TLR3/WNT5A/PRKCA/RHOB/FLT1/VEGFA/HIF1A	31
BP	GO:1904018	positive regulation of vasculature development	31/1285	187/18903	3.38e-06	3.96e-05	2.61e-05	C3/CYBB/IL1B/HMOX1/ITGAX/C3AR1/CX3CR1/RUNX1/CXCR4/CTSH/XBP1/C5AR1/SERPINE1/NINJ1/KLF4/IL1A/ZC3H12A/HK2/MIR29A/GRN/SIRT1/ITGA5/TMIGD2/NFE2L2/TLR3/WNT5A/PRKCA/RHOB/FLT1/VEGFA/HIF1A	31
BP	GO:0002833	positive regulation of response to biotic stimulus	31/1285	188/18903	3.78e-06	4.39e-05	2.89e-05	HLA-DRB1/TYROBP/HLA-E/HSP90AA1/HSPD1/HAVCR2/RPS19/CLEC7A/LY86/LYN/IFI16/SPI1/TLR4/CD14/PYCARD/SYK/PAK1/USP15/SFPQ/LY96/GRN/CCL5/HCK/PLCG2/IRF7/VAV1/SCIMP/OASL/AKIRIN2/WNT5A/PRKCA	31
BP	GO:0032872	regulation of stress-activated MAPK cascade	31/1285	195/18903	8.18e-06	8.85e-05	5.83e-05	DUSP1/IL1B/DNAJA1/GADD45B/TREM2/SPI1/TLR4/PYCARD/MAP4K4/NAIP/SDCBP/TNF/SIRPA/IL1A/CYLD/TAOK3/ZC3H12A/RASSF2/NCF1/RIPK2/MAP3K5/MYC/FOXO1/SCIMP/TLR3/WNT5A/DUSP10/PDCD4/MAP3K11/GADD45G/VEGFA	31
BP	GO:0051495	positive regulation of cytoskeleton organization	31/1285	195/18903	8.18e-06	8.85e-05	5.83e-05	HCLS1/HSPA1A/PLEK/BIN1/HSPA1B/NAV3/SCIN/RPS3/P2RX7/PYCARD/WAS/GRB2/NCKAP1L/PDE4DIP/CCDC88A/PAK1/ARPC2/CYFIP1/TGFBR1/HCK/BAIAP2/SWAP70/FMN1/FCHSD2/SNX9/NUP62/RAC1/EDN1/GPR65/S100A10/PROX1	31
BP	GO:0072330	monocarboxylic acid biosynthetic process	31/1285	218/18903	7.53e-05	0.000602259	0.000396906	CD74/IL1B/APOC1/TBXAS1/LTC4S/XBP1/DHRS9/GATM/PRKAG2/DAGLB/PTGS2/HPGDS/INSIG1/SIRT1/ALOX5/MLXIPL/ACSM5/PTGES3/PTGS1/APOC2/PLA2G4A/GSTM2/OSBPL3/EDN1/ABHD3/SCD/PROX1/PDK4/PNPLA8/QKI/ANXA1	31
BP	GO:0015833	peptide transport	31/1285	254/18903	0.00112628	0.00609157	0.00401452	CD74/HLA-DRB1/IL1B/SERP1/STX4/IRS2/UCP2/TNF/MIDN/ABCC4/CHD7/SLC15A2/CCL5/GLUL/ALOX5/TRPM2/PIM3/IL1RN/SLC15A3/JAK2/FOXO1/ICA1/PPP3CA/SLC8B1/EDN1/RAB1A/SLC16A1/KLF7/HIF1A/ABCA1/ANXA1	31
BP	GO:1903522	regulation of blood circulation	31/1285	263/18903	0.00196851	0.00964605	0.00635703	HSP90AA1/RGS2/MEF2A/BIN1/CELF2/ADORA3/DOCK4/TBXAS1/SLC8A1/ATP1B1/ATP1A1/GAA/TNF/ZC3H12A/PTGS2/P2RX4/ATP2B1/GCH1/SCN1B/SMAD7/PDE4B/JAK2/PIK3CG/KCNQ1/DSC2/GSTM2/EDN1/MMP2/KCNJ2/MDM2/HBEGF	31
BP	GO:0003018	vascular process in circulatory system	31/1285	270/18903	0.0029555	0.0136108	0.00896992	GPX1/RGS2/KLF2/SOD2/SLCO2B1/DOCK4/TBXAS1/SLC8A1/ADRB2/TGFB1/SLC7A5/SLC1A5/TNF/PTGS2/ABCC4/SLC15A2/ATP2B1/GCH1/PTPRJ/TFRC/APOE/KCNMA1/SLC7A8/PLVAP/KCNMB1/MFSD2A/EDN1/MMP2/SLC16A1/ABCG2/VEGFA	31
BP	GO:0072659	protein localization to plasma membrane	31/1285	285/18903	0.00654757	0.0261227	0.0172156	RHBDF2/TREM2/STX4/RILPL2/ATP1B1/PRNP/ATP2C1/TGFB1/TNF/CCDC88A/EHD4/STX7/RHOG/VAMP8/ABI3/RAB31/RAMP1/DAB2/GAS6/GAK/GGA2/RAPGEF6/EPB41L3/TSPAN14/PIK3R1/PICALM/S100A10/GOLGA4/SQSTM1/TTC7A/PRKCH	31
BP	GO:1903707	negative regulation of hemopoiesis	30/1285	114/18903	7.43e-11	2.23e-09	1.47e-09	CD74/CCL3/C1QC/ID2/LILRB4/RUNX1/MAFB/FGL2/LYN/CEBPA/INPP5D/TLR4/TRIB1/ZC3H12A/INHBA/LILRB1/SMAD7/PTPN2/MYC/IRF1/HSPA9/FBXW7/PIK3R1/TLR3/SOCS1/CDK6/HLX/RUNX3/NRARP/ANXA1	30
BP	GO:0045582	positive regulation of T cell differentiation	30/1285	117/18903	1.49e-10	4.29e-09	2.83e-09	CD74/PTPRC/HLA-DRA/HLA-DRB1/CD83/IL18/LILRB4/EGR3/RUNX1/NFKBID/LGALS9/XBP1/CD86/NLRP3/NFKBIZ/NCKAP1L/SYK/PNP/RIPK2/MALT1/IL4I1/RHOH/DUSP10/ZBTB1/SOCS1/FOXO3/HLX/RUNX3/TNFSF9/ANXA1	30
BP	GO:0046632	alpha-beta T cell differentiation	30/1285	117/18903	1.49e-10	4.29e-09	2.83e-09	HLA-DRA/HLA-DRB1/CD83/JUNB/IL18/GPR183/LILRB4/RUNX1/NFKBID/PTGER4/LGALS9/CD86/NLRP3/NFKBIZ/NCKAP1L/SYK/PNP/ZC3H12A/IL6R/PRDM1/RELB/RIPK2/SMAD7/IRF1/MALT1/SPN/SOCS1/HLX/RUNX3/ANXA1	30
BP	GO:0071887	leukocyte apoptotic process	30/1285	117/18903	1.49e-10	4.29e-09	2.83e-09	CD74/HCLS1/DOCK8/ST6GAL1/LGALS9/LYN/RPS6/IRS2/P2RX7/TCP1/ST3GAL1/BTK/CCL5/SLC39A10/LILRB1/SIRT1/MERTK/PLEKHO2/CXCL12/IRF7/GAS6/ARG2/WNT5A/GIMAP8/ADAM17/BCL2L11/MEF2C/HIF1A/TSC22D3/ANXA1	30
BP	GO:0050868	negative regulation of T cell activation	30/1285	128/18903	1.57e-09	3.66e-08	2.41e-08	CD74/LAPTM5/HLA-DRB1/HAVCR2/LILRB4/SOCS6/RUNX1/LGALS9/VSIG4/FGL2/CD86/PELI1/PRNP/NCKAP1L/CD300A/ZC3H12A/LILRB1/PTPN6/SMAD7/CEBPB/PTPN2/IRF1/ARG2/IL4I1/SPN/SOCS1/HLX/RUNX3/NRARP/ANXA1	30
BP	GO:0071621	granulocyte chemotaxis	30/1285	130/18903	2.32e-09	5.22e-08	3.44e-08	CD74/CSF1R/CCL3/CCL4/ITGB2/CSF3R/IL1B/FCER1G/C3AR1/CCL3L1/PREX1/C5AR1/CCL3L3/NCKAP1L/SYK/IL17RA/CCL5/CCL4L1/PDE4B/PIK3CG/VAV1/RAC2/TREM1/RAC1/EDN1/CCL2/MPP1/CCL20/CSF1/ANXA1	30
BP	GO:0035966	response to topologically incorrect protein	30/1285	163/18903	5.09e-07	7.21e-06	4.75e-06	HSPH1/HSP90AA1/HSPD1/HSPA1A/HSP90AB1/DNAJB1/HSPA1B/DNAJA1/PPP1R15A/BAG3/HSPE1/HSPA6/HSPA8/SERP1/XBP1/PPP1R15B/HERPUD1/ATF3/HSPA5/ERN1/PTPN2/DDIT3/ATF6/NFE2L2/NGLY1/HSPA9/AKIRIN2/PIK3R1/HSPA1L/BCL2L11	30
BP	GO:0048660	regulation of smooth muscle cell proliferation	30/1285	175/18903	2.39e-06	2.93e-05	1.93e-05	AIF1/ID2/SOD2/IL18/HMOX1/TNFAIP3/CDKN1A/NR4A3/TLR4/PDGFB/PTAFR/GNA13/TGFB1/TRIB1/JUN/TNF/IL6R/PTGS2/IGF1/CCL5/APOE/ERN1/MAP3K5/JAK2/GNAI2/EDN1/MMP2/HBEGF/PDCD4/MEF2C	30
BP	GO:0051048	negative regulation of secretion	30/1285	175/18903	2.39e-06	2.93e-05	1.93e-05	CD74/IL1B/CD84/HMOX1/RHBDF2/LGALS9/FRMD4A/SPI1/NCKAP1L/UCP2/TNF/OSM/CD300A/TNFRSF1B/MIDN/RAB11FIP1/VAMP8/SNCA/INHBA/LILRB1/APOE/PIM3/GNAI2/FOXO1/WNK1/SLC30A1/PPP3CA/EDN1/KLF7/ANXA1	30
BP	GO:0007179	transforming growth factor beta receptor signaling pathway	30/1285	216/18903	0.000149997	0.0010871	0.000716432	SKIL/HSPA1A/HSP90AB1/HTRA1/ARRB2/FOS/SPI1/LDLRAD4/TGFB1/JUN/SDCBP/USP15/CHST11/TGFBR1/HSPA5/SIRT1/SMAD7/LPXN/DAB2/APPL2/ADAMTSL2/SMURF2/SKI/ARID4A/CITED2/ADAM17/ZEB2/SAP30/GCNT2/SPRY2	30
BP	GO:1901215	negative regulation of neuron death	30/1285	218/18903	0.000176984	0.00124684	0.000821706	SORL1/NR4A2/SOD2/HSP90AB1/HMOX1/CX3CR1/CORO1A/ARRB2/NR4A3/BTG2/LGMN/IL6ST/JUN/NAIP/SERPINF1/TNFRSF1B/CLN8/CPEB4/SNCA/GRN/SIRT1/APOE/CEBPB/JAK2/KRAS/CCL2/NCOA7/CSF1/MEF2C/HIF1A	30
BP	GO:0046777	protein autophosphorylation	30/1285	226/18903	0.000333492	0.00214129	0.00141117	PTPRC/CSF1R/STK4/CLK1/LYN/PDGFB/MKNK1/JUN/STK17B/SYK/ATM/TAOK3/SIK1/PAK1/RAP2B/STK10/BTK/RASSF2/MKNK2/HCK/PIM3/ERN1/IRAK3/JAK2/DDX3X/OXSR1/PIM1/MAP3K11/FLT1/VEGFA	30
BP	GO:0006364	rRNA processing	30/1285	229/18903	0.000418239	0.0026301	0.00173331	RPS19/RPS24/DDX21/RPS6/RPS14/RPL11/RPS21/RPL26/EIF4A3/RPS8/RPL27/NAF1/USP36/CHD7/RPS16/RPS28/RPL14/RPL5/GTPBP4/PIH1D1/NOP58/RRP12/RPS27/RPS15/UTP6/RPL10A/DDX27/RPS25/NOP56/ISG20	30
BP	GO:0050769	positive regulation of neurogenesis	30/1285	231/18903	0.000484818	0.00295892	0.00195002	SKIL/ID2/IL1B/BIN1/CX3CR1/CXCR4/LYN/MIR142/TLR2/IL6ST/TGFB1/SEMA4D/SLC7A5/EGR2/TNF/SERPINF1/TIAM1/TNFRSF1B/CYFIP1/ACTR2/BAIAP2/CXCL12/KRAS/NDEL1/PLAG1/GOLGA4/PRKCH/RHEB/VEGFA/HIF1A	30
BP	GO:0046883	regulation of hormone secretion	30/1285	234/18903	0.000602217	0.00356291	0.00234806	HLA-DRB1/SPP1/IL1B/SERP1/STX4/IRS2/UCP2/TNF/OSM/MIDN/RAB11FIP1/VAMP8/CHD7/CCL5/GLUL/INHBA/ALOX5/TRPM2/PIM3/DAB2/JAK2/FOXO1/ICA1/PPP3CA/SLC8B1/EDN1/SLC16A1/KLF7/HIF1A/ANXA1	30
BP	GO:0060047	heart contraction	30/1285	250/18903	0.0017497	0.00872073	0.00574721	GPX1/HSP90AA1/RGS2/MEF2A/BIN1/CELF2/ADORA3/CXCR4/SLC8A1/ATP1B1/ATP1A1/GAA/MAP2K3/TNF/ZC3H12A/P2RX4/ATP2B1/GCH1/SCN1B/SMAD7/PDE4B/JAK2/PIK3CG/KCNQ1/DSC2/GSTM2/EDN1/KCNJ2/MDM2/HBEGF	30
BP	GO:0034976	response to endoplasmic reticulum stress	30/1285	261/18903	0.00336171	0.0149587	0.00985823	HSPA1A/PPP1R15A/PMAIP1/MARCKS/SERP1/XBP1/PPP1R15B/JUN/HERPUD1/ATF3/UBAC2/HSPA5/SIRT1/ALOX5/MAN1A1/CEBPB/ERN1/TNFRSF10B/APAF1/MAP3K5/PTPN2/DDIT3/ATF6/NFE2L2/NGLY1/DDX3X/PIK3R1/CASP4/UBE2J1/BCL2L11	30
BP	GO:0006874	cellular calcium ion homeostasis	30/1285	284/18903	0.0109663	0.0400396	0.0263873	PTPRC/CCL3/TPT1/CORO1A/LYN/SLC8A1/ATP1B1/ATP2C1/P2RX7/HERPUD1/CCR1/CHD7/SNCA/CCL5/ATP2B1/ATP13A3/PTPN6/TRPM2/APOE/RYR1/RASA3/CXCL12/DDIT3/PLCG2/SLC30A1/SLC8B1/GSTM2/EDN1/WNT5A/ITPR2	30
BP	GO:0046635	positive regulation of alpha-beta T cell activation	29/1285	73/18903	1.05e-15	7.1e-14	4.68e-14	PTPRC/HLA-DRA/HLA-DRB1/CD83/HSPH1/HLA-E/IL18/LILRB4/RUNX1/NFKBID/LGALS9/CD86/NLRP3/NFKBIZ/CD55/NCKAP1L/SYK/PNP/RASAL3/RIPK2/JAK2/HLA-A/MALT1/EBI3/CARD11/SOCS1/HLX/RUNX3/ANXA1	29
BP	GO:0150076	neuroinflammatory response	29/1285	73/18903	1.05e-15	7.1e-14	4.68e-14	PTPRC/TYROBP/CCL3/C1QA/AIF1/ITGB2/IL18/IL1B/CTSC/CX3CR1/IFNGR1/TREM2/C5AR1/MIR142/TLR2/JUN/TNF/ATM/TNFRSF1B/PTGS2/ITGAM/IGF1/SNCA/GRN/IFNGR2/PLCG2/JAK2/LDLR/TLR3	29
BP	GO:0002532	production of molecular mediator involved in inflammatory response	29/1285	100/18903	1.14e-11	4.17e-10	2.75e-10	RPS19/LILRB4/ALOX5AP/CLEC7A/PLD4/TREM2/LYN/TLR4/SERPINE1/PYCARD/TNF/SNAP23/SIRPA/SYK/ZC3H12A/ADCY7/VAMP8/IL17RA/BTK/TLR6/NCF1/GRN/ALOX5/APPL2/GPSM3/EZH2/DUSP10/PDCD4/HIF1A	29
BP	GO:0045639	positive regulation of myeloid cell differentiation	29/1285	103/18903	2.54e-11	8.53e-10	5.62e-10	CD74/HLA-DRB1/TYROBP/ID2/HCLS1/HSPA1A/HSPA1B/EVI2B/RUNX1/TREM2/SCIN/KLF10/INPP5D/FOS/TGFB1/TRIB1/NCKAP1L/CCR1/TNF/TAL1/INHBA/CASP8/PPP3CA/ZFP36L1/PRKCA/FOXO3/NEDD9/CSF1/HIF1A	29
BP	GO:0043280	positive regulation of cysteine-type endopeptidase activity involved in apoptotic process	29/1285	125/18903	3.76e-09	8.04e-08	5.3e-08	LAPTM5/HSPD1/HSPE1/CLEC7A/PMAIP1/CTSH/LGALS9/RPS3/NLRP3/PYCARD/TNF/SYK/SNCA/CASP1/SIRT1/TNFSF10/CARD8/APAF1/MAP3K5/MYC/CFLAR/CASP10/JAK2/NLRP1/MALT1/CASP8/DDX3X/BID/BCL2L11	29
BP	GO:1990266	neutrophil migration	29/1285	130/18903	9.75e-09	1.97e-07	1.3e-07	CD74/CCL3/CCL4/ITGB2/CSF3R/IL1B/FCER1G/C3AR1/CCL3L1/PREX1/C5AR1/CCL3L3/NCKAP1L/SYK/IL1A/RHOG/CCL5/CCL4L1/PDE4B/PIK3CG/VAV1/RAC2/TREM1/RAC1/EDN1/RHOH/CCL2/MPP1/CCL20	29
BP	GO:0008064	regulation of actin polymerization or depolymerization	29/1285	159/18903	9.52e-07	1.27e-05	8.37e-06	HCLS1/PLEK/BIN1/COTL1/CORO1A/SCIN/PYCARD/WAS/GRB2/NCKAP1L/CAPG/ARPC3/TMSB10/ARPC2/CYFIP1/ARPC1B/TMSB4X/ARHGAP18/PRKCD/HCK/BAIAP2/SWAP70/FMN1/CXCL12/FCHSD2/SNX9/SH3BP1/CAPZA1/SSH1	29
BP	GO:0030832	regulation of actin filament length	29/1285	162/18903	1.42e-06	1.83e-05	1.2e-05	HCLS1/PLEK/BIN1/COTL1/CORO1A/SCIN/PYCARD/WAS/GRB2/NCKAP1L/CAPG/ARPC3/TMSB10/ARPC2/CYFIP1/ARPC1B/TMSB4X/ARHGAP18/PRKCD/HCK/BAIAP2/SWAP70/FMN1/CXCL12/FCHSD2/SNX9/SH3BP1/CAPZA1/SSH1	29
BP	GO:0007568	aging	29/1285	169/18903	3.43e-06	4.01e-05	2.64e-05	GPX1/C1QA/SOD2/CTSC/CD68/SERP1/MBP/FOS/GNA13/GRB2/UCP2/JUND/SERPINF1/TNFRSF1B/PTGS2/INHBA/ATP2B1/TFRC/ERCC1/APAF1/HAMP/NFE2L2/KCNMB1/PPP3CA/CRYAB/POLB/EDN1/MMP2/FOXO3	29
BP	GO:0048771	tissue remodeling	29/1285	179/18903	1.09e-05	0.000113866	7.5e-05	CSF1R/SPP1/IL18/RUNX1/TNFAIP3/INPP5D/NFKB1/ADRB2/P2RX7/TGFB1/TMEM119/SYK/IL1A/CHD7/TPP1/RASSF2/LRRK1/LIPA/TFRC/CST3/HAMP/SNX10/PPP3CA/MMP2/MDM2/PRKCA/PDK4/MEF2C/HIF1A	29
BP	GO:0048017	inositol lipid-mediated signaling	29/1285	182/18903	1.51e-05	0.000151789	0.000100033	CSF1R/HCLS1/IL18/HCST/FCGR3A/TREM2/PDGFB/PTAFR/SEMA4D/TNF/OSM/PLCB2/IGF1/NCF1/CCL5/SIRT1/PTPN6/PIK3IP1/PIK3AP1/JAK2/PIK3CG/PIK3R5/PIK3R1/ZFP36L1/EDN1/GAB2/PLCL2/FLT1/ADAP2	29
BP	GO:1905952	regulation of lipid localization	29/1285	185/18903	2.08e-05	0.000198783	0.000131004	C3/SPP1/NFKBIA/IL1B/APOC1/TREM2/MSR1/NFKB1/IRS2/P2RX7/PLIN2/TNF/SYK/IL1A/ACSL1/ZC3H12A/P2RX4/PRKCD/SIRT1/OSBPL11/APOE/PTPN2/DBI/DAB2/APOC2/PLA2G4A/EDN1/ABCG1/ABCA1	29
BP	GO:0071248	cellular response to metal ion	29/1285	198/18903	7.43e-05	0.000595198	0.000392253	MEF2A/JUNB/CYBB/HMOX1/ALOX5AP/FOSB/LGMN/CEBPA/FOS/PRNP/JUN/JUND/SERPINF1/PPIF/ADCY7/PTGS2/P2RX4/SNCA/NCF1/HSPA5/TRPM2/RYR1/PLCG2/NFE2L2/SYT6/EDN1/WNT5A/MT1X/MEF2C	29
BP	GO:0071383	cellular response to steroid hormone stimulus	29/1285	209/18903	0.00019504	0.00135106	0.000890391	ZFP36L2/SGK1/HSPA1A/HSPA1B/DNAJA1/HSPA8/NR4A3/EIF4E/ZFP36/ATP1A1/YWHAH/SERPINF1/DDX5/PAK1/PADI2/FKBP4/DDIT4/HNRNPU/ATP2B1/SIRT1/CFLAR/PTGES3/DAB2/JAK2/ZFP36L1/EDN1/FOXO3/BCL2L11/ANXA1	29
BP	GO:0033157	regulation of intracellular protein transport	29/1285	225/18903	0.000675456	0.00393597	0.00259392	SORL1/HSP90AA1/HCLS1/ITGB2/IL1B/HSP90AB1/LCP1/BAG3/PLK3/PRNP/TGFB1/OAZ1/UBE2D3/ZC3H12A/PTGS2/ITGAM/USP36/INSIG1/PRKCD/UBAC2/JAK2/GAS6/FBXW7/RAC2/PIK3R1/NDEL1/UBE2J1/FRAT1/HSPA1L	29
BP	GO:0032984	protein-containing complex disassembly	29/1285	242/18903	0.00211052	0.0102572	0.00675978	PLEK/NAV3/HSPA8/SCIN/ADRB2/RPL23/CAPG/TNF/ETF1/CHMP1B/HMGA1/VAMP8/DDIT4/NCKAP5/SWAP70/ARHGEF2/ABCE1/IRAK3/GSPT1/MICAL1/MYC/SH3BP1/GAK/MAP1LC3B/UVRAG/CAPZA1/FRAT1/SETX/VMP1	29
BP	GO:0051259	protein complex oligomerization	29/1285	247/18903	0.00285971	0.0132116	0.00870684	CD74/HLA-DRB1/KCTD12/SOD2/STK4/ALOX5AP/PRNP/NINJ1/PYCARD/GLS/SLC1A5/SAMHD1/EHD4/ZC3H12A/JMJD6/HOMER1/SNCA/TMEM70/TRPM2/MLKL/RYR1/APPL2/MAT2A/YME1L1/SHMT1/NLRP1/CARD11/KCNJ2/ZBTB1	29
BP	GO:0071677	positive regulation of mononuclear cell migration	28/1285	73/18903	9.49e-15	5.67e-13	3.74e-13	CCL3/AIF1/CCL4/DOCK8/CX3CR1/CORO1A/LGALS9/LGMN/SPI1/SERPINE1/PYCARD/ABL2/CCR1/TNF/CCL5/ADAM10/CXCL12/WNK1/GAS6/OXSR1/JAM2/SPN/WNT5A/TNFSF14/ADAM17/CCL20/NEDD9/CSF1	28
BP	GO:2000106	regulation of leukocyte apoptotic process	28/1285	93/18903	9.45e-12	3.51e-10	2.32e-10	CD74/HCLS1/DOCK8/ST6GAL1/LGALS9/LYN/IRS2/P2RX7/TCP1/ST3GAL1/BTK/CCL5/SLC39A10/LILRB1/SIRT1/MERTK/CXCL12/IRF7/GAS6/ARG2/WNT5A/GIMAP8/ADAM17/BCL2L11/MEF2C/HIF1A/TSC22D3/ANXA1	28
BP	GO:0019882	antigen processing and presentation	28/1285	108/18903	4.62e-10	1.23e-08	8.1e-09	CD74/HLA-DRA/HLA-DRB1/HLA-E/HLA-DPA1/CTSS/HLA-DPB1/HLA-DQB1/FCER1G/FCGR1A/HLA-B/CD68/HLA-DMA/IFI30/TREM2/HLA-DQA1/CTSH/SLC11A1/HLA-DMB/FGL2/LGMN/PYCARD/WAS/HLA-DRB5/ICAM1/RELB/HLA-A/HLA-DOA	28
BP	GO:1902106	negative regulation of leukocyte differentiation	28/1285	108/18903	4.62e-10	1.23e-08	8.1e-09	CD74/CCL3/C1QC/ID2/LILRB4/RUNX1/MAFB/FGL2/LYN/INPP5D/TLR4/TRIB1/ZC3H12A/INHBA/LILRB1/SMAD7/PTPN2/MYC/IRF1/FBXW7/PIK3R1/TLR3/SOCS1/CDK6/HLX/RUNX3/NRARP/ANXA1	28
BP	GO:0035710	CD4-positive, alpha-beta T cell activation	28/1285	115/18903	2.18e-09	4.97e-08	3.28e-08	HLA-DRA/HLA-DRB1/CD83/JUNB/IL18/GPR183/RUNX1/NFKBID/PTGER4/LGALS9/CD86/NLRP3/NFKBIZ/CD55/NCKAP1L/ZC3H12A/IL6R/RELB/RIPK2/SMAD7/MALT1/ARG2/CARD11/SPN/SOCS1/HLX/RUNX3/ANXA1	28
BP	GO:0002832	negative regulation of response to biotic stimulus	28/1285	116/18903	2.69e-09	5.97e-08	3.94e-08	HLA-E/HAVCR2/RPS19/HLA-B/HTRA1/SERPINB9/ARRB2/TNFAIP3/LGALS9/VSIG4/FGL2/IFI16/TRIB1/SAMHD1/TRIM38/USP15/GRN/LILRB1/RNF125/CARD8/IRAK3/PTPN2/PARP14/HLA-A/ARG2/YTHDF3/IL4I1/DUSP10	28
BP	GO:0042542	response to hydrogen peroxide	28/1285	130/18903	3.92e-08	7.01e-07	4.62e-07	GPX1/KLF2/SOD2/HMOX1/KDM6B/TNFAIP3/NR4A3/RPS3/PPP1R15B/SLC8A1/SIRPA/PPIF/OSER1/PRKCD/SIRT1/TRPM2/ERN1/MAP3K5/EZH2/NFE2L2/CRYAB/EDN1/MMP2/FOXO3/NET1/SETX/RHOB/ANXA1	28
BP	GO:0050852	T cell receptor signaling pathway	28/1285	139/18903	1.75e-07	2.76e-06	1.82e-06	PTPRC/LAPTM5/HLA-DRB1/HLA-DPB1/HLA-DQB1/LILRB4/ELF1/NFKBID/RPS3/INPP5D/PRNP/NFKBIZ/CD300A/ZC3H12A/LCP2/RIPK2/CACNB4/THEMIS2/PTPN6/PTPRJ/ICOSLG/PDE4B/PTPN2/PLCG2/WNK1/HLA-A/MALT1/CARD11	28
BP	GO:0006986	response to unfolded protein	28/1285	141/18903	2.4e-07	3.66e-06	2.41e-06	HSPH1/HSP90AA1/HSPD1/HSPA1A/HSP90AB1/DNAJB1/HSPA1B/DNAJA1/PPP1R15A/BAG3/HSPE1/HSPA6/HSPA8/SERP1/XBP1/PPP1R15B/HERPUD1/ATF3/HSPA5/ERN1/PTPN2/DDIT3/ATF6/NFE2L2/HSPA9/PIK3R1/HSPA1L/BCL2L11	28
BP	GO:0034614	cellular response to reactive oxygen species	28/1285	150/18903	9e-07	1.2e-05	7.94e-06	KLF2/SOD2/KDM6B/TNFAIP3/NR4A3/RPS3/FOS/JUN/SIRPA/PPIF/BTK/OSER1/NCF1/PRKCD/GCH1/SIRT1/TRPM2/ERN1/MAP3K5/EZH2/NFE2L2/EDN1/MMP2/FOXO3/NET1/SETX/RHOB/ANXA1	28
BP	GO:0048015	phosphatidylinositol-mediated signaling	28/1285	178/18903	2.68e-05	0.00024633	0.000162339	CSF1R/HCLS1/IL18/HCST/FCGR3A/TREM2/PDGFB/PTAFR/SEMA4D/TNF/OSM/PLCB2/IGF1/NCF1/CCL5/SIRT1/PTPN6/PIK3IP1/PIK3AP1/JAK2/PIK3CG/PIK3R5/PIK3R1/ZFP36L1/EDN1/GAB2/PLCL2/FLT1	28
BP	GO:0031099	regeneration	28/1285	192/18903	0.000105906	0.00080795	0.000532463	GPX1/SPP1/LCP1/HMOX1/RUNX1/CDKN1A/NR4A3/NINJ1/KLF4/JUN/SLC7A5/IFRD1/UCP2/TNF/IGF1/GRN/CEBPB/CXCL12/CFLAR/HAMP/JAK2/EZH2/GAS6/PPP3CA/NDEL1/MMP2/DUSP10/ANXA1	28
BP	GO:0098739	import across plasma membrane	28/1285	202/18903	0.000253679	0.00170235	0.0011219	RGS2/SLC2A5/IRS2/SLC8A1/ATP1B1/FOLR2/PRNP/ATP1A1/SLC7A5/SLC1A5/TNF/ACSL1/CLN8/SLC43A2/ARL6IP1/SLC9A9/SLC15A2/SLC39A10/TRPM2/SLC15A3/SLC7A8/WNK1/SLC30A1/KCNQ1/PPP3CA/KCNJ2/CACNA1A/SLC3A2	28
BP	GO:0051701	biological process involved in interaction with host	28/1285	203/18903	0.000275607	0.00181381	0.00119535	CD74/HLA-DRB1/CTSB/HSPA1A/HSP90AB1/HSPA1B/CXCR4/SELPLG/LGALS9/CD86/CH25H/CD55/SLC1A5/ICAM1/TCP1/RPSA/CHMP1B/TRIM38/VAMP8/VPS37B/TFRC/ITGA5/TRIM22/GAS6/LDLR/UVRAG/RNASEK/SLC3A2	28
BP	GO:0034284	response to monosaccharide	28/1285	207/18903	0.000381053	0.00241987	0.00159477	HLA-DRB1/GPX1/SOD2/TREM2/SLC2A5/STX4/XBP1/IRS2/SLC8A1/ICAM1/TRA2B/UCP2/TNF/SERPINF1/IL1A/PTGS2/NCF1/GLUL/MLXIPL/PIM3/ERN1/PIH1D1/GAS6/PPP3CA/EGR1/FOXO3/KLF7/HIF1A	28
BP	GO:0030100	regulation of endocytosis	28/1285	209/18903	0.000446055	0.00277492	0.00182875	C3/BIN1/APOC1/TREM2/BMP2K/ARRB2/CD14/SERPINE1/ABL2/NCKAP1L/SDCBP/SYK/CD300A/EHD4/RIN3/SNCA/LILRB1/RAB31/APOE/DAB2/PLCG2/APPL2/APOC2/PPP3CA/PICALM/RAC1/WNT5A/VEGFA	28
BP	GO:1903050	regulation of proteolysis involved in protein catabolic process	28/1285	227/18903	0.00162663	0.00832422	0.00548591	LAPTM5/GPX1/HSPA1A/HSP90AB1/CTSC/HSPA1B/ZFAND2A/PLK3/TREM2/CEBPA/TRIB1/HERPUD1/RPL23/RPL11/SDCBP/UBB/SMAD7/APOE/RPL5/CSNK1D/DAB2/NFE2L2/RNF144B/FBXW7/FHIT/ARIH1/MDM2/RNF19A	28
BP	GO:0002790	peptide secretion	28/1285	230/18903	0.00197806	0.00967832	0.0063783	CD74/HLA-DRB1/IL1B/SERP1/STX4/IRS2/UCP2/TNF/MIDN/CHD7/CCL5/GLUL/ALOX5/TRPM2/PIM3/IL1RN/JAK2/FOXO1/ICA1/PPP3CA/SLC8B1/EDN1/RAB1A/SLC16A1/KLF7/HIF1A/ABCA1/ANXA1	28
BP	GO:0045926	negative regulation of growth	28/1285	249/18903	0.00607515	0.0244101	0.016087	SPP1/RGS2/HSPA1A/HSPA1B/STK4/CDKN1A/LGMN/ADRB2/TGFB1/SEMA4D/IFRD1/ARHGAP4/INHBA/SIRT1/PTPRJ/SIPA1/DAB2/DIP2B/DDX3X/CRYAB/WNT5A/DUSP10/CITED2/CDKN2AIP/MT1X/SPAG9/HIF1A/TSPYL2	28
BP	GO:0045017	glycerolipid biosynthetic process	28/1285	254/18903	0.00791425	0.0302683	0.0199477	C3/LPCAT2/SOCS6/INPP5D/PDGFB/LPIN2/CHKA/ATM/SIK1/ACSL1/SOCS3/GK/ETNK1/PLA2G15/PLCG2/PIK3CG/FBXW7/LDLR/UVRAG/PI4K2A/PLA2G4A/PIK3R1/MFSD2A/ABHD3/TTC7A/SOCS1/DGKA/PIP4K2A	28
BP	GO:0014706	striated muscle tissue development	28/1285	257/18903	0.00922265	0.0344909	0.0227305	RGS2/ID2/MEF2A/RUNX1/KDM6B/ARRB2/SLC8A1/TGFB1/IFRD1/SIK1/AKAP13/IGF1/CHD7/TGFBR1/HNRNPU/SMAD7/HAMP/ALPK3/SKI/PGM5/EDN1/WNT5A/PIM1/CITED2/MAML1/PROX1/MEF2C/VEGFA	28
BP	GO:0031663	lipopolysaccharide-mediated signaling pathway	27/1285	63/18903	1.03e-15	7.1e-14	4.68e-14	CCL3/NFKBIA/IL18/IL1B/TNFAIP3/LY86/LYN/SPI1/TLR4/TLR2/CD14/PTAFR/TGFB1/TRIB1/CD55/IRAK2/TNF/LY96/CCL5/RIPK2/HCK/CARD8/PLCG2/MALT1/SCIMP/CCL2/PRKCA	27
BP	GO:2000117	negative regulation of cysteine-type endopeptidase activity	27/1285	91/18903	3.23e-11	1.06e-09	6.98e-10	GPX1/DNAJB6/NR4A1/SERPINB9/ARRB2/IFI16/PLAUR/KLF4/NAIP/TNF/PTGS2/ARL6IP1/SNCA/RPS6KA1/RPS6KA3/CARD8/SIAH2/CST3/BIRC3/MICAL1/PIH1D1/GAS6/DDX3X/CRYAB/TNFSF14/TNFAIP8/VEGFA	27
BP	GO:0001776	leukocyte homeostasis	27/1285	100/18903	3.49e-10	9.51e-09	6.27e-09	CD74/SKIL/GPR183/PMAIP1/CORO1A/TNFAIP3/LGALS9/LYN/RPS6/P2RX7/NCKAP1L/DOCK10/BTK/SPNS2/LIPA/MERTK/PDE4B/TNFSF13B/SH2B3/TNFSF14/ADAM17/CSF1/BCL2L11/MEF2C/HIF1A/TSC22D3/ANXA1	27
BP	GO:0030316	osteoclast differentiation	27/1285	100/18903	3.49e-10	9.51e-09	6.27e-09	TYROBP/CSF1R/CCL3/JUNB/GPR183/LILRB4/TREM2/KLF10/MAFB/INPP5D/FOS/TLR4/CCR1/TNF/RASSF2/LRRK1/LILRB1/TFRC/CEBPB/SNX10/FBXW7/PPP3CA/PIK3R1/TLR3/GAB2/NEDD9/CSF1	27
BP	GO:0062207	regulation of pattern recognition receptor signaling pathway	27/1285	107/18903	1.8e-09	4.15e-08	2.74e-08	HSPA1A/HSPA1B/TREM2/ARRB2/TNFAIP3/LYN/PELI1/TLR4/TLR2/CD14/NINJ1/CD300A/USP15/TLR1/TLR6/SLC15A2/RNF125/TLR5/IRAK3/BIRC3/SLC15A3/IRF7/IRF1/APPL2/OASL/DDX3X/TLR3	27
BP	GO:1901222	regulation of NIK/NF-kappaB signaling	27/1285	111/18903	4.3e-09	9.13e-08	6.02e-08	LAPTM5/NFKBIA/HAVCR2/IL18/IL1B/TREM2/LGALS9/LITAF/CD86/RPS3/NLRP3/SPI1/TLR4/TLR2/CD14/TNF/CYLD/ZC3H12A/TMSB4X/TLR7/RASSF2/LIMS1/DDX3X/TLR3/EDN1/TNFSF14/PDCD4	27
BP	GO:0071901	negative regulation of protein serine/threonine kinase activity	27/1285	122/18903	3.74e-08	6.71e-07	4.42e-07	SORL1/RGS2/DUSP1/IL1B/DNAJA1/TNFAIP3/CDKN1A/CHORDC1/LYN/CEBPA/SLC8A1/PYCARD/PRKAG2/CD300A/HHEX/PRKCD/SIRT1/PTPN6/PTPRJ/APOE/IRAK3/SH2B3/NUP62/IPO7/DUSP10/PDCD4/SPRY2	27
BP	GO:0010595	positive regulation of endothelial cell migration	27/1285	131/18903	1.78e-07	2.79e-06	1.84e-06	HMOX1/LGMN/RIN2/PDGFB/TGFB1/MAP2K3/ZC3H12A/PTGS2/HDAC9/TMSB4X/P2RX4/MIR29A/GRN/SIRT1/PIK3CG/PLK2/NFE2L2/RAC1/EDN1/WNT5A/PRKCA/PROX1/ADAM17/RHOB/VEGFA/HIF1A/ANXA1	27
BP	GO:0030168	platelet activation	27/1285	133/18903	2.45e-07	3.72e-06	2.45e-06	PLEK/FCER1G/P2RY12/LYN/TLR4/PDGFB/IL6ST/GNA13/SYK/FERMT3/RAP2B/GNAQ/PDPN/PRKCD/PTPN6/MERTK/APOE/MMRN1/SH2B3/PLCG2/JAK2/PIK3CG/VAV1/PLA2G4A/GNAS/PRKCA/DGKA	27
BP	GO:0032147	activation of protein kinase activity	27/1285	148/18903	2.22e-06	2.76e-05	1.82e-05	IL18/RPLP1/SLC11A1/CD86/PDGFB/PRNP/ADRB2/NCKAP1L/CCDC88A/PRKAG2/CD300A/IL6R/IGF1/TLR6/PRKCD/CCL5/MOB1A/TNFRSF10B/JAK2/WNK1/GAS6/MALT1/TLR3/WNT5A/HBEGF/SOCS1/VEGFA	27
BP	GO:1903531	negative regulation of secretion by cell	27/1285	151/18903	3.31e-06	3.9e-05	2.57e-05	IL1B/CD84/HMOX1/RHBDF2/LGALS9/FRMD4A/SPI1/NCKAP1L/UCP2/OSM/CD300A/TNFRSF1B/MIDN/RAB11FIP1/VAMP8/SNCA/INHBA/LILRB1/APOE/PIM3/GNAI2/FOXO1/SLC30A1/PPP3CA/EDN1/KLF7/ANXA1	27
BP	GO:0051147	regulation of muscle cell differentiation	27/1285	160/18903	1.01e-05	0.000107444	7.08e-05	BHLHE41/RGS2/ID2/SOD2/ARRB2/XBP1/PDGFB/TGFB1/TMEM119/SIK1/HDAC9/IGF1/SIRT1/PIEZO1/NFATC1/HAMP/RBM38/EZH2/AKIRIN2/NFATC2/EDN1/MDM2/MAML1/PROX1/PDCD4/MORF4L2/MEF2C	27
BP	GO:0006633	fatty acid biosynthetic process	27/1285	164/18903	1.61e-05	0.000160181	0.000105564	CD74/IL1B/APOC1/TBXAS1/LTC4S/XBP1/PRKAG2/DAGLB/PTGS2/HPGDS/INSIG1/SIRT1/ALOX5/MLXIPL/ACSM5/PTGES3/PTGS1/APOC2/PLA2G4A/GSTM2/EDN1/ABHD3/SCD/PDK4/PNPLA8/QKI/ANXA1	27
BP	GO:0006606	protein import into nucleus	27/1285	165/18903	1.8e-05	0.000175427	0.000115611	HSP90AA1/HCLS1/NFKBIA/HSP90AB1/STK4/BAG3/CDKN1A/TGFB1/RPL23/SYK/ZC3H12A/PTGS2/PRKCD/RANBP2/JAK2/APPL2/NUP62/KPNA4/PPP3CA/AKIRIN2/PIK3R1/IPO7/SQSTM1/POM121/FAM53B/FAM53C/KPNA2	27
BP	GO:0051170	import into nucleus	27/1285	169/18903	2.8e-05	0.000255901	0.000168646	HSP90AA1/HCLS1/NFKBIA/HSP90AB1/STK4/BAG3/CDKN1A/TGFB1/RPL23/SYK/ZC3H12A/PTGS2/PRKCD/RANBP2/JAK2/APPL2/NUP62/KPNA4/PPP3CA/AKIRIN2/PIK3R1/IPO7/SQSTM1/POM121/FAM53B/FAM53C/KPNA2	27
BP	GO:0007254	JNK cascade	27/1285	172/18903	3.85e-05	0.000342001	0.000225389	IL1B/DNAJA1/GADD45B/PTGER4/NFKB1/TLR4/PYCARD/TRIB1/MAP4K4/NAIP/SDCBP/TNF/SIRPA/IL1A/CYLD/TAOK3/TLR7/RASSF2/NCF1/RIPK2/MAP3K5/TLR3/WNT5A/DUSP10/PDCD4/MAP3K11/GADD45G	27
BP	GO:0072331	signal transduction by p53 class mediator	27/1285	173/18903	4.27e-05	0.000376044	0.000247824	CD74/SGK1/RPS20/PLK3/PMAIP1/RPL37/CDKN1A/IFI16/NPM1/PYCARD/RPL23/RPL11/UBB/RPL26/DDX5/ATM/DDIT4/SIRT1/NDRG1/MLF1/RPL5/MYC/PLK2/FHIT/RPS15/MDM2/FOXO3	27
BP	GO:0046890	regulation of lipid biosynthetic process	27/1285	182/18903	0.000104135	0.000795484	0.000524247	CD74/C3/IL1B/APOC1/NFKB1/PDGFB/ATP1A1/TNF/IL1A/SIK1/PTGS2/INSIG1/PRKCD/SIRT1/MLXIPL/APOE/DAB2/FBXW7/APOC2/LDLR/MFSD2A/EGR1/ABCG1/PROX1/PDK4/IDH1/ANXA1	27
BP	GO:0046578	regulation of Ras protein signal transduction	27/1285	193/18903	0.000278998	0.00183405	0.00120869	ARHGAP24/LPAR6/ABL2/MCF2L/MAP4K4/CYTH4/MYO9B/AKAP13/IGF1/CYTH1/RASAL3/APOE/CDC42SE1/ARHGEF2/RASA3/PIK3CG/SH3BP1/NUP62/KRAS/RAC1/CDC42SE2/GPR65/SQSTM1/CSF1/NET1/SPRY2/ABCA1	27
BP	GO:0008016	regulation of heart contraction	27/1285	214/18903	0.00139969	0.00725886	0.0047838	HSP90AA1/RGS2/MEF2A/BIN1/CELF2/ADORA3/SLC8A1/ATP1B1/ATP1A1/GAA/TNF/ZC3H12A/P2RX4/ATP2B1/GCH1/SCN1B/SMAD7/PDE4B/JAK2/PIK3CG/KCNQ1/DSC2/GSTM2/EDN1/KCNJ2/MDM2/HBEGF	27
BP	GO:0060348	bone development	27/1285	233/18903	0.00467518	0.0198393	0.0130747	PTPRC/TYROBP/PTGER4/RPL13/SEMA4D/ABI1/TMEM119/CHSY1/AKAP13/IGF1/LRRK1/INSIG1/SPNS2/FOXN3/LILRB1/PTPN6/DHRS3/RYR1/FLI1/SH2B3/SNX10/SKI/FBXW7/GNAS/CITED2/MEF2C/PIP4K2A	27
BP	GO:0007163	establishment or maintenance of cell polarity	27/1285	234/18903	0.00495283	0.0205118	0.0135179	HSP90AA1/CCL4/DOCK8/HSP90AB1/FSCN1/FRMD4A/DOCK2/PARVG/ABL2/NCKAP1L/ACTR3/RHOG/CYTH1/FRMD4B/ACTR2/SDCCAG8/SPINT2/SH3BP1/CORO7/RAC2/RAC1/NDEL1/SPN/RHOH/WNT5A/RHOB/SPRY2	27
BP	GO:0031330	negative regulation of cellular catabolic process	27/1285	247/18903	0.0100005	0.0369555	0.0243547	PABPC1/SORL1/HSP90AB1/HMOX1/IL10RA/APOC1/MCL1/TREM2/SLC11A1/ZFP36/RPL23/SLC7A5/RPL11/SDCBP/NAF1/TAB2/HNRNPC/USP36/SNCA/HNRNPU/CST3/RPL5/FEZ2/PIK3CG/RBM38/FHIT/MFSD2A	27
BP	GO:0009636	response to toxic substance	27/1285	250/18903	0.0116227	0.0421969	0.027809	GPX1/CCL3/CCL4/SOD2/ALOX5AP/IPCEF1/LTC4S/LYN/MBP/FOS/TLR2/TNF/PTGS2/AKR1A1/SLC15A2/CCL5/GCH1/APOE/PTGS1/SLC7A8/NFE2L2/SLC30A1/GSTM2/PIM1/MT1X/TXNRD1/ABCG2	27
BP	GO:0032722	positive regulation of chemokine production	26/1285	70/18903	2.09e-13	1.01e-11	6.65e-12	CD74/CSF1R/AIF1/HAVCR2/IL18/IL1B/CD84/HMOX1/CLEC7A/LGALS9/MBP/TLR4/TLR2/PYCARD/TNF/SYK/IL6R/IL17RA/TLR7/RIPK2/DDX3X/TLR3/EGR1/WNT5A/ADAM17/HIF1A	26
BP	GO:0002720	positive regulation of cytokine production involved in immune response	26/1285	79/18903	5.34e-12	2.04e-10	1.34e-10	CD74/LAPTM5/HLA-E/IL18/IL1B/CLEC7A/DDX21/NR4A3/NLRP3/TLR4/P2RX7/PYCARD/CD55/SLC7A5/SYK/TLR7/RIPK2/LILRB1/SIRT1/ARID5A/PLCG2/HLA-A/MALT1/SCIMP/TLR3/WNT5A	26
BP	GO:0043299	leukocyte degranulation	26/1285	79/18903	5.34e-12	2.04e-10	1.34e-10	CCL3/ITGB2/CD84/HMOX1/FCGR3A/CORO1A/NR4A3/LGALS9/STX4/LYN/SPI1/LAT2/PTAFR/NCKAP1L/SNAP23/SYK/CD300A/ITGAM/VAMP8/BTK/HCK/STXBP2/PIK3CG/RAC2/GAB2/MILR1	26
BP	GO:1901216	positive regulation of neuron death	26/1285	91/18903	1.89e-10	5.35e-09	3.53e-09	TYROBP/CCL3/C1QA/ITGB2/MCL1/FOS/TLR4/PRNP/TNF/ATM/ITGAM/SNCA/TLR6/DDIT4/GRN/TRPM2/MAP3K5/DDIT3/CASP8/FBXW7/PICALM/EGR1/WNT5A/FOXO3/MAP3K11/BCL2L11	26
BP	GO:0032677	regulation of interleukin-8 production	26/1285	103/18903	3.56e-09	7.68e-08	5.06e-08	CD74/PTPRC/HSPA1A/IL1B/HSPA1B/CLEC7A/LGALS9/TLR4/TLR2/CD14/SERPINE1/KLF4/PYCARD/TNF/SYK/TLR1/TMSB4X/TLR7/TLR6/TLR5/DDIT3/CD33/TLR3/RAB1A/WNT5A/ANXA1	26
BP	GO:0050764	regulation of phagocytosis	26/1285	103/18903	3.56e-09	7.68e-08	5.06e-08	PTPRC/C3/IL1B/FCER1G/FCGR1A/CLEC7A/TREM2/SLC11A1/DOCK2/TLR2/PYCARD/NCKAP1L/TNF/SIRPA/SYK/CD300A/BTK/PTPRJ/HCK/RAB31/MERTK/C2/PLCG2/APPL2/GAS6/CCL2	26
BP	GO:0032637	interleukin-8 production	26/1285	104/18903	4.45e-09	9.34e-08	6.16e-08	CD74/PTPRC/HSPA1A/IL1B/HSPA1B/CLEC7A/LGALS9/TLR4/TLR2/CD14/SERPINE1/KLF4/PYCARD/TNF/SYK/TLR1/TMSB4X/TLR7/TLR6/TLR5/DDIT3/CD33/TLR3/RAB1A/WNT5A/ANXA1	26
BP	GO:0030593	neutrophil chemotaxis	26/1285	106/18903	6.86e-09	1.41e-07	9.27e-08	CD74/CCL3/CCL4/ITGB2/CSF3R/IL1B/FCER1G/C3AR1/CCL3L1/PREX1/C5AR1/CCL3L3/NCKAP1L/SYK/CCL5/CCL4L1/PDE4B/PIK3CG/VAV1/RAC2/TREM1/RAC1/EDN1/CCL2/MPP1/CCL20	26
BP	GO:0033209	tumor necrosis factor-mediated signaling pathway	26/1285	109/18903	1.29e-08	2.52e-07	1.66e-07	LAPTM5/NFKBIA/HSPA1A/HSPA1B/TNFAIP3/PYCARD/NAIP/TNF/SYK/CYLD/TNFRSF1B/TMSB4X/CASP1/CARD8/PTPN2/BIRC3/TNFSF13B/LIMS1/JAK2/TNFRSF13C/PLVAP/GAS6/CASP8/CASP4/ADAM17/FOXO3	26
BP	GO:0002456	T cell mediated immunity	26/1285	113/18903	2.86e-08	5.23e-07	3.45e-07	PTPRC/HLA-DRA/HLA-DRB1/HLA-E/HSPD1/IL18/IL1B/CTSC/HLA-B/LILRB4/CTSH/NLRP3/P2RX7/WAS/CD55/NCKAP1L/ICAM1/TNFRSF1B/STX7/LILRB1/SMAD7/ARID5A/HLA-A/MALT1/IL4I1/ZBTB1	26
BP	GO:0071453	cellular response to oxygen levels	26/1285	175/18903	0.000135331	0.000991971	0.000653738	CYBB/HMOX1/PLK3/PMAIP1/TREM2/FOS/SLC8A1/JUND/PTGS2/CPEB4/SIRT1/NDRG1/MYC/CFLAR/FOXO1/NFE2L2/VHL/KCNMB1/ZFP36L1/EDN1/MDM2/EGR1/CITED2/FOXO3/VEGFA/HIF1A	26
BP	GO:0043534	blood vessel endothelial cell migration	26/1285	177/18903	0.000163296	0.00117032	0.000771276	GPX1/HMOX1/EGR3/NR4A1/PDGFB/TGFB1/KLF4/MAP2K3/TNF/VASH1/PTGS2/HDAC9/TMSB4X/P2RX4/SIRT1/APOE/PLK2/SH3BP1/NFE2L2/FBXW7/PRKCA/ADAM17/MEF2C/VEGFA/HIF1A/ANXA1	26
BP	GO:0044000	movement in host	26/1285	183/18903	0.000280484	0.00184173	0.00121375	CD74/HLA-DRB1/CTSB/HSPA1A/HSPA1B/CXCR4/SELPLG/LGALS9/CD86/CH25H/CD55/SLC1A5/ICAM1/RPSA/CHMP1B/TRIM38/VAMP8/VPS37B/TFRC/ITGA5/TRIM22/GAS6/LDLR/UVRAG/RNASEK/SLC3A2	26
BP	GO:0051896	regulation of protein kinase B signaling	26/1285	189/18903	0.000466607	0.00287797	0.00189667	GPX1/CCL3/HSP90AA1/HCLS1/IL18/HSP90AB1/CX3CR1/ARRB2/P2RY12/TGFB1/TNF/OSM/IGF1/P2RX4/TGFBR1/MIR29A/SIRT1/PTPRJ/DDIT3/SH2B3/PIK3CG/GAS6/PIK3R5/HBEGF/GCNT2/SPRY2	26
BP	GO:0009746	response to hexose	26/1285	199/18903	0.00102103	0.00562233	0.00370528	HLA-DRB1/GPX1/TREM2/SLC2A5/STX4/XBP1/IRS2/SLC8A1/ICAM1/TRA2B/UCP2/TNF/SERPINF1/PTGS2/NCF1/GLUL/MLXIPL/PIM3/ERN1/PIH1D1/GAS6/PPP3CA/EGR1/FOXO3/KLF7/HIF1A	26
BP	GO:0120032	regulation of plasma membrane bounded cell projection assembly	26/1285	199/18903	0.00102103	0.00562233	0.00370528	HSP90AA1/ARHGAP24/P2RY12/FSCN1/P2RX7/WAS/ICAM1/CCDC88A/ACTR3/CYLD/RCC2/ARPC2/CYFIP1/RHOG/TGFBR1/ACTR2/PRKCD/SDCCAG8/ABI3/TRPM2/RAC2/PIK3R1/RAC1/NDEL1/ARAP1/TBC1D7	26
BP	GO:0060491	regulation of cell projection assembly	26/1285	201/18903	0.00118329	0.00631159	0.00415952	HSP90AA1/ARHGAP24/P2RY12/FSCN1/P2RX7/WAS/ICAM1/CCDC88A/ACTR3/CYLD/RCC2/ARPC2/CYFIP1/RHOG/TGFBR1/ACTR2/PRKCD/SDCCAG8/ABI3/TRPM2/RAC2/PIK3R1/RAC1/NDEL1/ARAP1/TBC1D7	26
BP	GO:0044706	multi-multicellular organism process	26/1285	218/18903	0.00371132	0.0163264	0.0107596	CTSB/SPP1/RGS2/HAVCR2/JUNB/IL1B/LGALS9/FOSB/B4GALT1/FOS/PTAFR/UCP2/MAFF/ADCY7/PTGS2/FKBP4/PRDM1/RPL29/ITGA5/SMURF2/YTHDF3/EDN1/MMP2/CITED2/VMP1/VEGFA	26
BP	GO:0030072	peptide hormone secretion	26/1285	225/18903	0.00563827	0.023152	0.0152579	HLA-DRB1/IL1B/SERP1/STX4/IRS2/UCP2/TNF/MIDN/CHD7/CCL5/GLUL/ALOX5/TRPM2/PIM3/IL1RN/JAK2/FOXO1/ICA1/PPP3CA/SLC8B1/EDN1/RAB1A/SLC16A1/KLF7/HIF1A/ANXA1	26
BP	GO:0022618	ribonucleoprotein complex assembly	26/1285	234/18903	0.00927246	0.0345512	0.0227703	HSP90AA1/HSP90AB1/CELF2/RPS19/EIF5/RPL13A/RPL38/RPS14/RPL11/RPLP0/ATM/RPSA/RPL10/NAF1/RPS28/RPL5/PIH1D1/PTGES3/EIF3F/RPS27/RPS15/RPL24/YTHDC1/RPS5/USP4/SETX	26
BP	GO:0048738	cardiac muscle tissue development	26/1285	241/18903	0.0132628	0.0466049	0.030714	RGS2/ID2/MEF2A/RUNX1/KDM6B/ARRB2/SLC8A1/TGFB1/SIK1/AKAP13/IGF1/CHD7/TGFBR1/HNRNPU/SMAD7/HAMP/ALPK3/SKI/EDN1/WNT5A/PIM1/CITED2/MAML1/PROX1/MEF2C/VEGFA	26
BP	GO:0071826	ribonucleoprotein complex subunit organization	26/1285	242/18903	0.0139313	0.0487175	0.0321062	HSP90AA1/HSP90AB1/CELF2/RPS19/EIF5/RPL13A/RPL38/RPS14/RPL11/RPLP0/ATM/RPSA/RPL10/NAF1/RPS28/RPL5/PIH1D1/PTGES3/EIF3F/RPS27/RPS15/RPL24/YTHDC1/RPS5/USP4/SETX	26
BP	GO:0032729	positive regulation of interferon-gamma production	25/1285	77/18903	1.92e-11	6.7e-10	4.42e-10	HLA-DPA1/HSPD1/HAVCR2/HLA-DPB1/IL18/IL1B/CLEC7A/IRF8/LGALS9/SLC11A1/TLR4/CD14/PYCARD/SLC7A5/TNF/TLR7/RIPK2/LILRB1/ARID5A/PDE4B/JAK2/HLA-A/EBI3/TLR3/WNT5A	25
BP	GO:0043367	CD4-positive, alpha-beta T cell differentiation	25/1285	88/18903	4.82e-10	1.28e-08	8.42e-09	HLA-DRA/HLA-DRB1/CD83/JUNB/IL18/GPR183/RUNX1/NFKBID/PTGER4/LGALS9/CD86/NLRP3/NFKBIZ/NCKAP1L/ZC3H12A/IL6R/RELB/RIPK2/SMAD7/MALT1/SPN/SOCS1/HLX/RUNX3/ANXA1	25
BP	GO:0032479	regulation of type I interferon production	25/1285	105/18903	2.54e-08	4.72e-07	3.11e-07	REL/HSP90AA1/HSPD1/HAVCR2/IRF8/TLR4/TLR2/CD14/PYCARD/SIRPA/SYK/CYLD/TRIM38/TLR7/ZC3HAV1/RELB/RIPK2/LILRB1/RNF125/IRF5/PLCG2/IRF7/IRF1/DDX3X/TLR3	25
BP	GO:0032606	type I interferon production	25/1285	105/18903	2.54e-08	4.72e-07	3.11e-07	REL/HSP90AA1/HSPD1/HAVCR2/IRF8/TLR4/TLR2/CD14/PYCARD/SIRPA/SYK/CYLD/TRIM38/TLR7/ZC3HAV1/RELB/RIPK2/LILRB1/RNF125/IRF5/PLCG2/IRF7/IRF1/DDX3X/TLR3	25
BP	GO:0009408	response to heat	25/1285	114/18903	1.43e-07	2.31e-06	1.52e-06	HSP90AA1/HSPA1A/IER5/HSP90AB1/DNAJB1/HSPA1B/DNAJA1/DNAJB6/HMOX1/DNAJA4/BAG3/HSPA6/CHORDC1/LYN/TFEC/CD14/ATM/IL1A/PTGS2/IGF1/SIRT1/TRPM2/DNAJC2/CXCL12/CRYAB	25
BP	GO:0043406	positive regulation of MAP kinase activity	25/1285	117/18903	2.43e-07	3.7e-06	2.44e-06	PTPRC/IL1B/RPS3/TLR4/PDGFB/P2RX7/TGFB1/FGD2/TNF/SYK/TAOK3/PAK1/AKAP13/TLR6/ERN1/MAP3K5/PIK3CG/EZH2/PIK3R5/EDN1/WNT5A/MAP3K11/FLT1/MEF2C/VEGFA	25
BP	GO:0045598	regulation of fat cell differentiation	25/1285	147/18903	1.86e-05	0.000180153	0.000118726	ZFP36L2/ID2/SOD2/STK4/XBP1/CEBPA/ZFP36/TGFB1/TNF/ZC3H12A/SYAP1/PTGS2/JDP2/HNRNPU/INSIG1/SIRT1/ALOX5/METRNL/CEBPB/DDIT3/FOXO1/ZFP36L1/WNT5A/PIM1/DUSP10	25
BP	GO:0036294	cellular response to decreased oxygen levels	25/1285	159/18903	7.15e-05	0.000576494	0.000379927	CYBB/HMOX1/PLK3/PMAIP1/TREM2/FOS/SLC8A1/JUND/PTGS2/CPEB4/SIRT1/NDRG1/MYC/CFLAR/NFE2L2/VHL/KCNMB1/ZFP36L1/EDN1/MDM2/EGR1/CITED2/FOXO3/VEGFA/HIF1A	25
BP	GO:1990845	adaptive thermogenesis	25/1285	160/18903	7.94e-05	0.000629469	0.000414839	SORL1/IL18/CXCR4/KDM6B/TLR4/G0S2/ADRB2/GATM/UCP2/SYK/ACSL1/ARRDC3/HNRNPU/CEBPB/DDIT3/JAK2/APPL2/TLE3/GNAS/PLCL2/SCD/ADAM17/RHEB/GADD45G/VEGFA	25
BP	GO:0043484	regulation of RNA splicing	25/1285	180/18903	0.000514529	0.00311119	0.00205037	HSPA1A/CELF2/HSPA8/CCNL1/CLK1/NPM1/KHDRBS3/RPS13/TRA2B/DDX5/JMJD6/TRA2A/HNRNPU/ERN1/PTBP3/RBM38/SRSF2/PIK3R1/YTHDC1/MBNL1/SETX/ENY2/SRSF7/QKI/HNRNPA2B1	25
BP	GO:0097696	receptor signaling pathway via STAT	25/1285	183/18903	0.00065921	0.00384808	0.002536	PTPRC/CSF1R/HCLS1/IL18/CSF2RA/IL10RA/SOCS6/LYN/IL6ST/TGFB1/TNF/OSM/CD300A/IL6R/SOCS3/IGF1/CCL5/PTPN2/SH2B3/PARP14/HAMP/JAK2/VHL/CCL2/SOCS1	25
BP	GO:0010721	negative regulation of cell development	25/1285	188/18903	0.000979688	0.00542006	0.00357198	SPP1/SORL1/IL1B/TREM2/MBP/SEMA4D/YWHAH/IFRD1/TNF/IL1A/RCC2/ARHGAP4/IGF1/LILRB1/APPL2/SKI/DIP2B/FBXW7/LDLR/PPP3CA/DNAJB11/WNT5A/DUSP10/PROX1/VEGFA	25
BP	GO:1901654	response to ketone	25/1285	205/18903	0.00326724	0.0146621	0.00966277	SPP1/SGK1/KLF2/CYBB/PTGER4/FOSB/EIF4E/MBP/FOS/TLR2/PTAFR/TGFB1/RPLP0/SERPINF1/RPL27/DDIT4/NCF1/ATP2B1/SIRT1/CFLAR/JAK2/GAS6/GNG2/EDN1/FOXO3	25
BP	GO:0044703	multi-organism reproductive process	25/1285	209/18903	0.0042136	0.018191	0.0119884	CTSB/SPP1/RGS2/HAVCR2/JUNB/IL1B/LGALS9/FOSB/FOS/PTAFR/UCP2/MAFF/ADCY7/PTGS2/FKBP4/PRDM1/RPL29/ITGA5/SMURF2/YTHDF3/EDN1/MMP2/CITED2/VMP1/VEGFA	25
BP	GO:0007623	circadian rhythm	25/1285	210/18903	0.00448312	0.0192257	0.0126703	BHLHE41/ID2/EGR3/KLF10/JUND/TNF/SIK1/NAMPT/HOMER1/GNAQ/SFPQ/HNRNPU/NFIL3/RELB/SIRT1/SIAH2/BHLHE40/CSNK1D/NRIP1/EZH2/FBXW7/EGR1/PROX1/TOP1/SETX	25
BP	GO:0002377	immunoglobulin production	25/1285	219/18903	0.00762193	0.0293457	0.0193397	PTPRC/HLA-DRA/HLA-DRB1/HLA-E/HLA-DPA1/HSPD1/HLA-DPB1/HLA-DQB1/HLA-DMA/HLA-DQA1/STX4/HLA-DMB/XBP1/CD86/TGFB1/HLA-DRB5/SAMHD1/TNF/BTK/TFRC/SWAP70/ERCC1/TMIGD2/HLA-DOA/POLB	25
BP	GO:0010810	regulation of cell-substrate adhesion	25/1285	222/18903	0.00900246	0.0339378	0.022366	ST6GAL1/STK4/PREX1/RIN2/PDGFB/SERPINE1/MAP4K4/RCC2/ARPC2/PDPN/PTPRJ/FMN1/ITGA5/LIMS1/DAB2/JAK2/RAC2/PIK3R1/RAC1/S100A10/CDK6/NEDD9/CSF1/GCNT2/VEGFA	25
BP	GO:0010001	glial cell differentiation	25/1285	227/18903	0.0117518	0.0423737	0.0279255	C1QA/ID2/IL1B/BIN1/IFNGR1/TREM2/CXCR4/LYN/C5AR1/TLR4/MIR142/TLR2/IL6ST/TGFB1/EGR2/TNF/TNFRSF1B/GRN/NDRG1/SKI/KRAS/LDLR/DUSP10/CDK6/RHEB	25
BP	GO:0048588	developmental cell growth	25/1285	229/18903	0.0130255	0.0459098	0.0302559	SPP1/HSP90AA1/RGS2/HSP90AB1/CXCR4/SEMA4D/IFRD1/AKAP13/ARHGAP4/CYFIP1/IGF1/C9orf72/SMAD7/APOE/CXCL12/HAMP/ITSN2/DIP2B/ALCAM/NDEL1/EDN1/WNT5A/GOLGA4/SPAG9/VEGFA	25
BP	GO:0061900	glial cell activation	24/1285	54/18903	1.49e-14	8.65e-13	5.7e-13	PTPRC/TYROBP/CCL3/C1QA/AIF1/ITGB2/IL1B/CTSC/CX3CR1/IFNGR1/TREM2/C5AR1/MIR142/TLR2/JUN/TNF/ATM/ITGAM/SNCA/GRN/IFNGR2/JAK2/LDLR/TLR3	24
BP	GO:0032623	interleukin-2 production	24/1285	63/18903	9.19e-13	3.89e-11	2.56e-11	PTPRC/LAPTM5/CD83/HAVCR2/IL1B/LILRB4/CLEC7A/RUNX1/NAV3/TNFAIP3/VSIG4/CD86/RPS3/ZFP36/PRNP/PNP/IL1A/RIPK2/HOMER3/PDE4B/PLCG2/MALT1/CARD11/ANXA1	24
BP	GO:0032663	regulation of interleukin-2 production	24/1285	63/18903	9.19e-13	3.89e-11	2.56e-11	PTPRC/LAPTM5/CD83/HAVCR2/IL1B/LILRB4/CLEC7A/RUNX1/NAV3/TNFAIP3/VSIG4/CD86/RPS3/ZFP36/PRNP/PNP/IL1A/RIPK2/HOMER3/PDE4B/PLCG2/MALT1/CARD11/ANXA1	24
BP	GO:2000401	regulation of lymphocyte migration	24/1285	69/18903	9.1e-12	3.4e-10	2.24e-10	CCL3/AIF1/CCL4/DOCK8/CORO1A/PYCARD/ABL2/PADI2/STK10/SPNS2/CCL5/ADAM10/CXCL12/WNK1/OXSR1/JAM2/SLC8B1/SPN/WNT5A/CCL2/TNFSF14/ADAM17/CCL20/NEDD9	24
BP	GO:0046637	regulation of alpha-beta T cell differentiation	24/1285	73/18903	3.59e-11	1.17e-09	7.71e-10	HLA-DRA/HLA-DRB1/CD83/JUNB/IL18/LILRB4/RUNX1/NFKBID/LGALS9/CD86/NLRP3/NFKBIZ/NCKAP1L/SYK/PNP/ZC3H12A/PRDM1/RIPK2/SMAD7/MALT1/SOCS1/HLX/RUNX3/ANXA1	24
BP	GO:0032732	positive regulation of interleukin-1 production	24/1285	74/18903	4.97e-11	1.56e-09	1.03e-09	TYROBP/CCL3/HAVCR2/CLEC7A/LGALS9/IFI16/NLRP3/TLR4/P2RX7/PYCARD/NAIP/TNF/TLR6/CASP1/RIPK2/CARD8/TMEM106A/IL16/JAK2/NLRP1/MALT1/CASP8/EGR1/WNT5A	24
BP	GO:0043154	negative regulation of cysteine-type endopeptidase activity involved in apoptotic process	24/1285	78/18903	1.72e-10	4.9e-09	3.23e-09	GPX1/DNAJB6/NR4A1/SERPINB9/ARRB2/PLAUR/KLF4/NAIP/TNF/PTGS2/ARL6IP1/SNCA/RPS6KA1/RPS6KA3/SIAH2/BIRC3/MICAL1/PIH1D1/GAS6/DDX3X/CRYAB/TNFSF14/TNFAIP8/VEGFA	24
BP	GO:0046209	nitric oxide metabolic process	24/1285	82/18903	5.45e-10	1.42e-08	9.35e-09	HSP90AA1/AIF1/KLF2/SOD2/IL1B/HSP90AB1/CLEC7A/CX3CR1/TLR4/TLR2/KLF4/TNF/SIRPA/ZC3H12A/PTGS2/GLA/P2RX4/TLR6/GCH1/TMEM106A/JAK2/ARG2/RAC1/EDN1	24
BP	GO:2001057	reactive nitrogen species metabolic process	24/1285	83/18903	7.18e-10	1.82e-08	1.2e-08	HSP90AA1/AIF1/KLF2/SOD2/IL1B/HSP90AB1/CLEC7A/CX3CR1/TLR4/TLR2/KLF4/TNF/SIRPA/ZC3H12A/PTGS2/GLA/P2RX4/TLR6/GCH1/TMEM106A/JAK2/ARG2/RAC1/EDN1	24
BP	GO:1990868	response to chemokine	24/1285	98/18903	2.68e-08	4.94e-07	3.26e-07	CCL3/DUSP1/CCL4/DOCK8/CX3CR1/CCL3L1/TREM2/CXCR4/LYN/CCL3L3/CCR1/ZC3H12A/PADI2/CCL5/CCL4L1/CXCL12/SH2B3/CCRL2/WNK1/OXSR1/EDN1/CCL2/CCL20/HIF1A	24
BP	GO:1990869	cellular response to chemokine	24/1285	98/18903	2.68e-08	4.94e-07	3.26e-07	CCL3/DUSP1/CCL4/DOCK8/CX3CR1/CCL3L1/TREM2/CXCR4/LYN/CCL3L3/CCR1/ZC3H12A/PADI2/CCL5/CCL4L1/CXCL12/SH2B3/CCRL2/WNK1/OXSR1/EDN1/CCL2/CCL20/HIF1A	24
BP	GO:0031341	regulation of cell killing	24/1285	102/18903	6.13e-08	1.06e-06	6.99e-07	PTPRC/HLA-DRA/HLA-DRB1/TYROBP/HLA-E/HAVCR2/HSP90AB1/HLA-B/CLEC7A/CX3CR1/SERPINB9/ARRB2/LGALS9/SPI1/P2RX7/CD55/NCKAP1L/ICAM1/SYK/ITGAM/STX7/LILRB1/VAV1/HLA-A	24
BP	GO:0042100	B cell proliferation	24/1285	104/18903	9.11e-08	1.5e-06	9.92e-07	CD74/PTPRC/TYROBP/HSPD1/GPR183/CDKN1A/LYN/INPP5D/IRS2/PELI1/TLR4/NCKAP1L/ATM/CD300A/BTK/PRKCD/SLC39A10/TFRC/TNFSF13B/TNFRSF13C/NFATC2/CARD11/PLCL2/MEF2C	24
BP	GO:0071347	cellular response to interleukin-1	24/1285	111/18903	3.34e-07	4.93e-06	3.25e-06	CCL3/KLF2/CCL4/IL1B/CCL3L1/NFKB1/PYCARD/CCL3L3/IRAK2/SIRPA/GBP2/ZC3H12A/CCL5/CEBPB/CCL4L1/IL1RN/IRAK3/TANK/EDN1/MMP2/EGR1/CCL2/CCL20/HIF1A	24
BP	GO:0002708	positive regulation of lymphocyte mediated immunity	24/1285	119/18903	1.27e-06	1.66e-05	1.1e-05	PTPRC/HLA-DRA/HLA-DRB1/HLA-E/C3/HSPD1/IL18/IL1B/FCGR1A/HLA-B/TREM2/NLRP3/P2RX7/TGFB1/CD55/TNF/STX7/BTK/TFRC/ARID5A/VAV1/HLA-A/MALT1/ZBTB1	24
BP	GO:0035967	cellular response to topologically incorrect protein	24/1285	120/18903	1.49e-06	1.91e-05	1.26e-05	HSPD1/HSPA1A/HSPA1B/PPP1R15A/BAG3/HSPA6/HSPA8/SERP1/XBP1/PPP1R15B/HERPUD1/ATF3/HSPA5/ERN1/PTPN2/DDIT3/ATF6/NFE2L2/NGLY1/HSPA9/AKIRIN2/PIK3R1/HSPA1L/BCL2L11	24
BP	GO:0030833	regulation of actin filament polymerization	24/1285	140/18903	2.36e-05	0.000223212	0.000147104	HCLS1/BIN1/COTL1/CORO1A/SCIN/PYCARD/GRB2/NCKAP1L/CAPG/ARPC3/TMSB10/ARPC2/CYFIP1/ARPC1B/TMSB4X/ARHGAP18/PRKCD/HCK/BAIAP2/FMN1/FCHSD2/SNX9/CAPZA1/SSH1	24
BP	GO:0046718	viral entry into host cell	24/1285	151/18903	8.31e-05	0.000651942	0.000429649	CD74/HLA-DRB1/CTSB/HSPA1A/HSPA1B/CXCR4/SELPLG/LGALS9/CD86/CH25H/CD55/SLC1A5/ICAM1/RPSA/TRIM38/VAMP8/TFRC/ITGA5/TRIM22/GAS6/LDLR/UVRAG/RNASEK/SLC3A2	24
BP	GO:0071456	cellular response to hypoxia	24/1285	151/18903	8.31e-05	0.000651942	0.000429649	CYBB/HMOX1/PLK3/PMAIP1/TREM2/FOS/SLC8A1/JUND/PTGS2/SIRT1/NDRG1/MYC/CFLAR/NFE2L2/VHL/KCNMB1/ZFP36L1/EDN1/MDM2/EGR1/CITED2/FOXO3/VEGFA/HIF1A	24
BP	GO:0071322	cellular response to carbohydrate stimulus	24/1285	152/18903	9.24e-05	0.000712681	0.000469678	HLA-DRB1/GPX1/CLEC7A/TREM2/SLC2A5/STX4/XBP1/IRS2/ICAM1/MAP2K3/TRA2B/UCP2/SERPINF1/NCF1/MLXIPL/PIM3/ERN1/PIH1D1/GAS6/PPP3CA/ZFP36L1/FOXO3/KLF7/HIF1A	24
BP	GO:0001678	cellular glucose homeostasis	24/1285	158/18903	0.000170842	0.00120798	0.000796095	HLA-DRB1/GPX1/TREM2/STX4/XBP1/IRS2/ICAM1/TRA2B/UCP2/SERPINF1/HK2/NCF1/SIRT1/MLXIPL/PIM3/ERN1/PIH1D1/FOXO1/GAS6/PPP3CA/PIK3R1/FOXO3/KLF7/HIF1A	24
BP	GO:0044409	entry into host	24/1285	158/18903	0.000170842	0.00120798	0.000796095	CD74/HLA-DRB1/CTSB/HSPA1A/HSPA1B/CXCR4/SELPLG/LGALS9/CD86/CH25H/CD55/SLC1A5/ICAM1/RPSA/TRIM38/VAMP8/TFRC/ITGA5/TRIM22/GAS6/LDLR/UVRAG/RNASEK/SLC3A2	24
BP	GO:0031960	response to corticosteroid	24/1285	165/18903	0.000332583	0.00213782	0.00140889	ZFP36L2/SGK1/AIF1/CYBB/FOSB/EIF4E/FOS/ZFP36/PTAFR/TNF/SERPINF1/PTGS2/RPL27/DDIT4/HNRNPU/ATP2B1/IL1RN/CFLAR/JAK2/ZFP36L1/EDN1/FOXO3/BCL2L11/ANXA1	24
BP	GO:0030307	positive regulation of cell growth	24/1285	167/18903	0.000398578	0.00252287	0.00166265	CXCL16/CXCR4/SEMA4D/SDCBP/CYFIP1/IGF1/TGFBR1/RPS6KA1/SMAD7/RPS6KA3/ADAM10/CXCL12/HAMP/ITSN2/SLC25A33/DDX3X/NDEL1/MFSD2A/EDN1/GOLGA4/HBEGF/CDKN2AIP/ADAM17/VEGFA	24
BP	GO:0007259	receptor signaling pathway via JAK-STAT	24/1285	172/18903	0.000616108	0.00363028	0.00239246	PTPRC/CSF1R/HCLS1/IL18/CSF2RA/IL10RA/SOCS6/LYN/IL6ST/TNF/OSM/CD300A/IL6R/SOCS3/IGF1/CCL5/PTPN2/SH2B3/PARP14/HAMP/JAK2/VHL/CCL2/SOCS1	24
BP	GO:1903034	regulation of response to wounding	24/1285	172/18903	0.000616108	0.00363028	0.00239246	SPP1/CLEC7A/CXCR4/TNFAIP3/XBP1/SIGLEC10/PDGFB/PLAUR/SERPINE1/KLF4/TNF/MIR29A/GRN/PRKCD/ALOX5/APOE/MMRN1/SH2B3/TNFRSF12A/NFE2L2/NDEL1/EDN1/HBEGF/ANXA1	24
BP	GO:1901136	carbohydrate derivative catabolic process	24/1285	176/18903	0.000858468	0.00484963	0.00319605	NEU1/TYMP/TGFB1/AOAH/SAMHD1/NUDT3/PNP/GLA/NPL/BTK/PRKCD/UPP1/MANBA/NAGK/MAN1A1/MGAT1/CST3/PDE4B/LYVE1/NGLY1/HEXA/AMPD3/PDE7A/MBD4	24
BP	GO:0034767	positive regulation of ion transmembrane transport	24/1285	186/18903	0.00185295	0.00919025	0.00605665	CTSS/TREM2/ATP1B1/ADRB2/PTAFR/P2RX7/NDUFA4/GLRX/ARL6IP1/TMSB4X/P2RX4/SNCA/IFNGR2/CACNB4/PLCG2/WNK1/KCNQ1/KCNMB1/PPP3CA/GSTM2/EDN1/KCNJ2/CCL2/VMP1	24
BP	GO:0061136	regulation of proteasomal protein catabolic process	24/1285	194/18903	0.00324101	0.0145636	0.00959786	GPX1/HSPA1A/HSP90AB1/HSPA1B/ZFAND2A/PLK3/TREM2/CEBPA/TRIB1/HERPUD1/RPL11/SDCBP/UBB/SMAD7/APOE/CSNK1D/DAB2/NFE2L2/RNF144B/FBXW7/FHIT/ARIH1/MDM2/RNF19A	24
BP	GO:0001935	endothelial cell proliferation	24/1285	199/18903	0.00449099	0.019231	0.0126738	HMOX1/EGR3/NR4A1/PDGFB/JUN/TNF/VASH1/TGFBR1/MIR29A/SIRT1/ALOX5/APOE/ERN1/CXCL12/WNT5A/CCL2/PRKCA/PROX1/ADAM17/FLT1/MEF2C/VEGFA/HIF1A/NRARP	24
BP	GO:0032388	positive regulation of intracellular transport	24/1285	199/18903	0.00449099	0.019231	0.0126738	SORL1/HSP90AA1/HCLS1/ITGB2/IL1B/HSP90AB1/BAG3/PLK3/PRNP/TGFB1/OAZ1/UBE2D3/ZC3H12A/PTGS2/ITGAM/USP36/PRKCD/DAB2/JAK2/GAS6/FBXW7/RAC2/PIK3R1/HSPA1L	24
BP	GO:0006403	RNA localization	24/1285	202/18903	0.0054179	0.0223262	0.0147136	NPM1/ZFP36/TCP1/MRPL18/EIF4A3/ATM/HHEX/NAF1/HNRNPU/MX2/RANBP2/CCT4/PIH1D1/DCP2/NOP58/NUP62/DDX39A/ZFP36L1/YTHDC1/POM121/ENY2/SRSF7/QKI/HNRNPA2B1	24
BP	GO:0007204	positive regulation of cytosolic calcium ion concentration	24/1285	205/18903	0.00649824	0.0259661	0.0171124	C3AR1/CX3CR1/CXCR4/PTGER4/C5AR1/LPAR6/SLC8A1/FPR1/P2RX7/GNA13/ABL2/CD55/CCR1/P2RX4/CACNB4/GNA15/SWAP70/CCRL2/JAK2/PIK3CG/EDN1/GPR65/CD52/CACNA1A	24
BP	GO:0007033	vacuole organization	24/1285	213/18903	0.0102715	0.0376253	0.0247962	LAPTM5/BAG3/CORO1A/P2RX7/GAA/GABARAPL1/CHMP1B/CLN8/TPP1/GRN/C9orf72/ATP6V0A1/TBC1D12/FEZ2/LYST/ATP6V1F/MAP1LC3B/HEXA/RAB1A/RNASEK/VMP1/ATP6V0B/PIP4K2A/ABCA1	24
BP	GO:0017157	regulation of exocytosis	24/1285	213/18903	0.0102715	0.0376253	0.0247962	ITGB2/CD84/HMOX1/LGALS9/STX4/LYN/SPI1/PTAFR/NCKAP1L/SDCBP/SYK/CD300A/ITGAM/VAMP8/SNCA/CACNB4/STXBP2/MICAL1/GNAI2/RAC2/SYT6/GAB2/S100A10/ANXA1	24
BP	GO:1902806	regulation of cell cycle G1/S phase transition	24/1285	213/18903	0.0102715	0.0376253	0.0247962	AIF1/ID2/PLK3/CDKN1A/CCNH/KLF4/RPL26/ATM/MIR29A/INHBA/CACNB4/PTPN6/MLF1/PLCG2/PLK2/APPL2/EZH2/DDX3X/FBXW7/MDM2/CCL2/ADAM17/BID/ANXA1	24
BP	GO:0001774	microglial cell activation	23/1285	47/18903	3.82e-15	2.36e-13	1.55e-13	PTPRC/TYROBP/CCL3/C1QA/AIF1/ITGB2/CTSC/CX3CR1/IFNGR1/TREM2/C5AR1/MIR142/TLR2/JUN/TNF/ATM/ITGAM/SNCA/GRN/IFNGR2/JAK2/LDLR/TLR3	23
BP	GO:0002269	leukocyte activation involved in inflammatory response	23/1285	50/18903	2.1e-14	1.17e-12	7.72e-13	PTPRC/TYROBP/CCL3/C1QA/AIF1/ITGB2/CTSC/CX3CR1/IFNGR1/TREM2/C5AR1/MIR142/TLR2/JUN/TNF/ATM/ITGAM/SNCA/GRN/IFNGR2/JAK2/LDLR/TLR3	23
BP	GO:0072678	T cell migration	23/1285	73/18903	2.42e-10	6.79e-09	4.47e-09	CCL3/AIF1/DOCK8/GPR183/CXCL16/CORO1A/PYCARD/ABL2/ICAM1/SPNS2/CCL5/ADAM10/CXCL12/PIK3CG/WNK1/ITGAL/OXSR1/SPN/WNT5A/CCL2/TNFSF14/ADAM17/CCL20	23
BP	GO:2000514	regulation of CD4-positive, alpha-beta T cell activation	23/1285	79/18903	1.4e-09	3.35e-08	2.21e-08	HLA-DRA/HLA-DRB1/CD83/JUNB/IL18/RUNX1/NFKBID/LGALS9/CD86/NLRP3/NFKBIZ/CD55/NCKAP1L/ZC3H12A/RIPK2/SMAD7/MALT1/ARG2/CARD11/SOCS1/HLX/RUNX3/ANXA1	23
BP	GO:0008625	extrinsic apoptotic signaling pathway via death domain receptors	23/1285	85/18903	6.7e-09	1.38e-07	9.07e-08	GPX1/SKIL/STK4/HMOX1/BAG3/PMAIP1/TNFAIP3/STX4/SPI1/SERPINE1/ICAM1/TNF/ATF3/DEDD2/ARHGEF2/TNFRSF10B/CFLAR/CASP8/DDX3X/TMC8/PIK3R1/ITPRIP/BID	23
BP	GO:0002709	regulation of T cell mediated immunity	23/1285	89/18903	1.74e-08	3.34e-07	2.2e-07	PTPRC/HLA-DRA/HLA-DRB1/HLA-E/HSPD1/IL18/IL1B/HLA-B/LILRB4/NLRP3/P2RX7/WAS/CD55/NCKAP1L/TNFRSF1B/STX7/LILRB1/SMAD7/ARID5A/HLA-A/MALT1/IL4I1/ZBTB1	23
BP	GO:0070664	negative regulation of leukocyte proliferation	23/1285	96/18903	8.05e-08	1.35e-06	8.87e-07	HLA-DRB1/TYROBP/HAVCR2/LST1/LILRB4/TNFAIP3/LGALS9/VSIG4/LYN/CD86/INPP5D/PELI1/PRNP/RASSF5/ATM/CD300A/BTK/LILRB1/PTPN6/CEBPB/ARG2/IL4I1/SPN	23
BP	GO:0008630	intrinsic apoptotic signaling pathway in response to DNA damage	23/1285	102/18903	2.63e-07	3.94e-06	2.6e-06	CD74/SKIL/SOD2/TPT1/HMOX1/MCL1/CDKN1A/BCL2A1/IFI16/RPS3/PYCARD/TNF/RPL26/ATM/TNFRSF1B/FNIP2/DDIT4/SIRT1/CXCL12/PIK3R1/POLB/BID/BCL2L11	23
BP	GO:1905954	positive regulation of lipid localization	23/1285	113/18903	1.78e-06	2.25e-05	1.48e-05	C3/SPP1/NFKBIA/IL1B/TREM2/MSR1/NFKB1/P2RX7/PLIN2/IL1A/ACSL1/ZC3H12A/P2RX4/PRKCD/SIRT1/OSBPL11/APOE/DBI/DAB2/PLA2G4A/EDN1/ABCG1/ABCA1	23
BP	GO:0051897	positive regulation of protein kinase B signaling	23/1285	120/18903	5.22e-06	5.89e-05	3.88e-05	GPX1/CCL3/HSP90AA1/HCLS1/IL18/HSP90AB1/CX3CR1/ARRB2/P2RY12/TGFB1/TNF/OSM/IGF1/P2RX4/TGFBR1/MIR29A/PTPRJ/PIK3CG/GAS6/PIK3R5/HBEGF/GCNT2/SPRY2	23
BP	GO:0099024	plasma membrane invagination	23/1285	136/18903	4.33e-05	0.000379467	0.00025008	C3/AIF1/ITGB2/FCGR1A/TREM2/ELMO1/BIN2/MSR1/NCKAP1L/ARHGAP25/CD300A/ARHGAP12/ITGAM/RHOG/RAB31/PLCG2/SNX9/APPL2/SH3BP1/RAC2/RAC1/RHOH/ABCA1	23
BP	GO:0046328	regulation of JNK cascade	23/1285	141/18903	7.71e-05	0.00061505	0.000405336	IL1B/DNAJA1/GADD45B/TLR4/PYCARD/MAP4K4/NAIP/SDCBP/TNF/SIRPA/IL1A/CYLD/TAOK3/RASSF2/NCF1/RIPK2/MAP3K5/TLR3/WNT5A/DUSP10/PDCD4/MAP3K11/GADD45G	23
BP	GO:0010212	response to ionizing radiation	23/1285	143/18903	9.62e-05	0.00074012	0.000487761	PTPRC/GPX1/SOD2/NABP1/CDKN1A/IFI16/GRB2/RPL26/ATM/IL1A/HSPA5/SIRT1/ERCC1/MYC/HAMP/TANK/CRYAB/POLB/MDM2/EGR1/NET1/RHOB/ANXA1	23
BP	GO:0010324	membrane invagination	23/1285	143/18903	9.62e-05	0.00074012	0.000487761	C3/AIF1/ITGB2/FCGR1A/TREM2/ELMO1/BIN2/MSR1/NCKAP1L/ARHGAP25/CD300A/ARHGAP12/ITGAM/RHOG/RAB31/PLCG2/SNX9/APPL2/SH3BP1/RAC2/RAC1/RHOH/ABCA1	23
BP	GO:0014065	phosphatidylinositol 3-kinase signaling	23/1285	145/18903	0.000119491	0.000887081	0.000584612	HCLS1/IL18/HCST/FCGR3A/TREM2/PDGFB/SEMA4D/TNF/OSM/IGF1/NCF1/CCL5/SIRT1/PTPN6/PIK3IP1/PIK3AP1/JAK2/PIK3CG/PIK3R5/PIK3R1/ZFP36L1/EDN1/FLT1	23
BP	GO:0051592	response to calcium ion	23/1285	147/18903	0.00014759	0.00107503	0.000708479	MEF2A/JUNB/ALOX5AP/FOSB/LGMN/FOS/P2RX7/JUN/JUND/PPIF/HOMER1/HSPA5/TRPM2/RYR1/KCNMA1/PLCG2/KCNMB1/PPP3CA/SYT6/EDN1/WNT5A/SUCNR1/MEF2C	23
BP	GO:0106106	cold-induced thermogenesis	23/1285	147/18903	0.00014759	0.00107503	0.000708479	IL18/CXCR4/KDM6B/TLR4/G0S2/ADRB2/GATM/UCP2/SYK/ACSL1/ARRDC3/CEBPB/DDIT3/JAK2/APPL2/TLE3/GNAS/PLCL2/SCD/ADAM17/RHEB/GADD45G/VEGFA	23
BP	GO:0120161	regulation of cold-induced thermogenesis	23/1285	147/18903	0.00014759	0.00107503	0.000708479	IL18/CXCR4/KDM6B/TLR4/G0S2/ADRB2/GATM/UCP2/SYK/ACSL1/ARRDC3/CEBPB/DDIT3/JAK2/APPL2/TLE3/GNAS/PLCL2/SCD/ADAM17/RHEB/GADD45G/VEGFA	23
BP	GO:0043535	regulation of blood vessel endothelial cell migration	23/1285	150/18903	0.000200735	0.0013839	0.00091203	HMOX1/PDGFB/TGFB1/KLF4/MAP2K3/TNF/VASH1/PTGS2/HDAC9/TMSB4X/P2RX4/SIRT1/APOE/PLK2/SH3BP1/NFE2L2/FBXW7/PRKCA/ADAM17/MEF2C/VEGFA/HIF1A/ANXA1	23
BP	GO:0062013	positive regulation of small molecule metabolic process	23/1285	152/18903	0.000244951	0.00165258	0.0010891	CD74/IL1B/PMAIP1/TREM2/NR4A3/IRS2/PTAFR/P2RX7/TNF/PTGS2/IGF1/TMSB4X/SNCA/SIRT1/MLXIPL/APOE/PTPN2/DAB2/FOXO1/APOC2/ABCG1/HIF1A/ANXA1	23
BP	GO:0043524	negative regulation of neuron apoptotic process	23/1285	154/18903	0.000297535	0.00194269	0.00128029	NR4A2/SOD2/HSP90AB1/HMOX1/CX3CR1/CORO1A/ARRB2/BTG2/LGMN/IL6ST/JUN/NAIP/CLN8/CPEB4/SNCA/GRN/APOE/CEBPB/JAK2/KRAS/CCL2/MEF2C/HIF1A	23
BP	GO:0045834	positive regulation of lipid metabolic process	23/1285	154/18903	0.000297535	0.00194269	0.00128029	CD74/IL1B/APOC1/NR4A3/P2RY12/LYN/IRS2/PDGFB/TGFB1/TNF/IL1A/DAGLB/PTGS2/PRKCD/MLXIPL/APOE/DAB2/APOC2/LDLR/MFSD2A/ABCG1/FLT1/ANXA1	23
BP	GO:0090316	positive regulation of intracellular protein transport	23/1285	157/18903	0.000395002	0.00250298	0.00164953	SORL1/HSP90AA1/HCLS1/ITGB2/IL1B/HSP90AB1/BAG3/PLK3/PRNP/TGFB1/OAZ1/UBE2D3/ZC3H12A/PTGS2/ITGAM/USP36/PRKCD/JAK2/GAS6/FBXW7/RAC2/PIK3R1/HSPA1L	23
BP	GO:2000058	regulation of ubiquitin-dependent protein catabolic process	23/1285	170/18903	0.00121228	0.00641899	0.0042303	LAPTM5/HSPA1A/HSP90AB1/HSPA1B/ZFAND2A/PLK3/CEBPA/TRIB1/HERPUD1/RPL23/RPL11/SDCBP/SMAD7/RPL5/CSNK1D/DAB2/NFE2L2/RNF144B/FBXW7/FHIT/ARIH1/MDM2/RNF19A	23
BP	GO:0006937	regulation of muscle contraction	23/1285	174/18903	0.00165816	0.0083965	0.00553354	HSP90AA1/RGS2/BIN1/DOCK4/NR4A1/SLC8A1/ATP1B1/ADRB2/PTAFR/ATP1A1/ZC3H12A/PTGS2/P2RX4/ATP2B1/SMAD7/PDE4B/KCNMA1/PIK3CG/KCNQ1/DSC2/GSTM2/EDN1/KCNJ2	23
BP	GO:0060538	skeletal muscle organ development	23/1285	176/18903	0.00192928	0.00952378	0.00627645	GPX1/NR4A1/BTG2/FOS/TGFB1/EGR2/BASP1/DDX5/MAFF/HDAC9/HOMER1/ATF3/RYR1/GPCPD1/CFLAR/SKI/KRAS/PPP3CA/EGR1/CITED2/SAP30/HLX/MEF2C	23
BP	GO:0006941	striated muscle contraction	23/1285	181/18903	0.00277695	0.0129636	0.00854339	HSP90AA1/RGS2/BIN1/NR4A1/CXCR4/SLC8A1/ATP1B1/ATP1A1/GAA/MAP2K3/TNF/ZC3H12A/HOMER1/P2RX4/SCN1B/SMAD7/PDE4B/PIK3CG/ARG2/KCNQ1/DSC2/GSTM2/KCNJ2	23
BP	GO:0002791	regulation of peptide secretion	23/1285	182/18903	0.00297967	0.0137112	0.00903609	CD74/HLA-DRB1/IL1B/SERP1/STX4/IRS2/UCP2/TNF/MIDN/CHD7/CCL5/GLUL/ALOX5/TRPM2/PIM3/JAK2/FOXO1/ICA1/PPP3CA/SLC8B1/SLC16A1/KLF7/HIF1A	23
BP	GO:0001936	regulation of endothelial cell proliferation	23/1285	183/18903	0.00319471	0.0144223	0.00950474	HMOX1/EGR3/NR4A1/PDGFB/JUN/TNF/VASH1/TGFBR1/MIR29A/SIRT1/ALOX5/APOE/CXCL12/WNT5A/CCL2/PRKCA/PROX1/ADAM17/FLT1/MEF2C/VEGFA/HIF1A/NRARP	23
BP	GO:0008361	regulation of cell size	23/1285	183/18903	0.00319471	0.0144223	0.00950474	SPP1/HSP90AA1/PLEK/HSP90AB1/NPM1/P2RX7/SEMA4D/IFRD1/ARHGAP4/CYFIP1/CLN8/APOE/CXCL12/KCNMA1/VAV1/DIP2B/RAC1/NDEL1/EDN1/DEPTOR/WNT5A/GOLGA4/VEGFA	23
BP	GO:0030073	insulin secretion	23/1285	183/18903	0.00319471	0.0144223	0.00950474	HLA-DRB1/IL1B/SERP1/STX4/IRS2/UCP2/TNF/MIDN/CCL5/GLUL/ALOX5/TRPM2/PIM3/IL1RN/JAK2/FOXO1/ICA1/PPP3CA/SLC8B1/SLC16A1/KLF7/HIF1A/ANXA1	23
BP	GO:0090087	regulation of peptide transport	23/1285	184/18903	0.00342266	0.0151949	0.0100139	CD74/HLA-DRB1/IL1B/SERP1/STX4/IRS2/UCP2/TNF/MIDN/CHD7/CCL5/GLUL/ALOX5/TRPM2/PIM3/JAK2/FOXO1/ICA1/PPP3CA/SLC8B1/SLC16A1/KLF7/HIF1A	23
BP	GO:0055001	muscle cell development	23/1285	191/18903	0.00543171	0.0223672	0.0147407	GPX1/RGS2/MEF2A/BIN1/SLC8A1/AKAP13/HDAC9/HOMER1/IGF1/HNRNPU/CACNB4/RYR1/CFLAR/HAMP/ALPK3/SKI/PPP3CA/PGM5/NFATC2/EDN1/MAML1/PROX1/VEGFA	23
BP	GO:0009749	response to glucose	23/1285	194/18903	0.00655094	0.0261227	0.0172156	HLA-DRB1/GPX1/TREM2/STX4/XBP1/IRS2/SLC8A1/ICAM1/TRA2B/UCP2/SERPINF1/NCF1/GLUL/MLXIPL/PIM3/ERN1/PIH1D1/GAS6/PPP3CA/EGR1/FOXO3/KLF7/HIF1A	23
BP	GO:1902115	regulation of organelle assembly	23/1285	207/18903	0.0137954	0.0482715	0.0318123	HSPA1A/LCP1/HSPA1B/FSCN1/NPM1/SDCBP/TNF/CCDC88A/CYLD/CHMP1B/HNRNPU/GRID2/C9orf72/SDCCAG8/IL1RAP/ABI3/HCK/TBC1D12/FEZ2/PLK2/NUP62/TBC1D7/PIP4K2A	23
BP	GO:0002886	regulation of myeloid leukocyte mediated immunity	22/1285	60/18903	2e-11	6.93e-10	4.57e-10	TYROBP/HLA-E/C3/ITGB2/CD84/HMOX1/FCGR1A/CX3CR1/DDX21/LGALS9/STX4/LYN/SPI1/PTAFR/SYK/CD300A/ITGAM/VAMP8/BTK/STXBP2/RAC2/GAB2	22
BP	GO:0043030	regulation of macrophage activation	22/1285	62/18903	4.24e-11	1.36e-09	8.96e-10	CD74/PTPRC/CCL3/HSPD1/HAVCR2/CTSC/CD84/TREM2/VSIG4/CEBPA/TLR4/MIR142/JUND/ATM/ZC3H12A/SNCA/TLR6/GRN/HAMP/LDLR/PLA2G4A/WNT5A	22
BP	GO:0032731	positive regulation of interleukin-1 beta production	22/1285	63/18903	6.11e-11	1.87e-09	1.23e-09	TYROBP/CCL3/CLEC7A/LGALS9/IFI16/NLRP3/TLR4/P2RX7/PYCARD/NAIP/TNF/TLR6/CASP1/RIPK2/CARD8/TMEM106A/JAK2/NLRP1/MALT1/CASP8/EGR1/WNT5A	22
BP	GO:0048002	antigen processing and presentation of peptide antigen	22/1285	64/18903	8.71e-11	2.6e-09	1.72e-09	CD74/HLA-DRA/HLA-DRB1/HLA-E/HLA-DPA1/CTSS/HLA-DPB1/HLA-DQB1/FCER1G/FCGR1A/HLA-B/HLA-DMA/IFI30/TREM2/HLA-DQA1/SLC11A1/HLA-DMB/LGMN/PYCARD/HLA-DRB5/HLA-A/HLA-DOA	22
BP	GO:0048247	lymphocyte chemotaxis	22/1285	65/18903	1.23e-10	3.59e-09	2.37e-09	CCL3/CCL4/GPR183/CXCL16/CCL3L1/CH25H/CCL3L3/PADI2/CCL5/CCL4L1/ADAM10/PIK3CG/WNK1/GAS6/OXSR1/SLC8B1/WNT5A/CCL2/TNFSF14/ADAM17/CCL20/NEDD9	22
BP	GO:0050766	positive regulation of phagocytosis	22/1285	74/18903	2.05e-09	4.69e-08	3.09e-08	PTPRC/C3/IL1B/FCER1G/FCGR1A/CLEC7A/TREM2/SLC11A1/DOCK2/PYCARD/NCKAP1L/TNF/SIRPA/BTK/PTPRJ/RAB31/MERTK/C2/PLCG2/APPL2/GAS6/CCL2	22
BP	GO:0006809	nitric oxide biosynthetic process	22/1285	76/18903	3.58e-09	7.68e-08	5.06e-08	HSP90AA1/AIF1/KLF2/SOD2/IL1B/HSP90AB1/CLEC7A/CX3CR1/TLR4/KLF4/TNF/SIRPA/ZC3H12A/PTGS2/GLA/P2RX4/TLR6/GCH1/JAK2/ARG2/RAC1/EDN1	22
BP	GO:0002292	T cell differentiation involved in immune response	22/1285	79/18903	7.94e-09	1.61e-07	1.06e-07	HLA-DRA/HLA-DRB1/JUNB/IL18/GPR183/FCER1G/NFKBID/PTGER4/LGALS9/FGL2/CD86/NLRP3/NFKBIZ/ZC3H12A/IL6R/RELB/RIPK2/SMAD7/MALT1/SPN/HLX/ANXA1	22
BP	GO:0061515	myeloid cell development	22/1285	83/18903	2.15e-08	4.05e-07	2.67e-07	TYROBP/KLF2/EVI2B/RPS6/PABPC4/TLR2/ABI1/NCKAP1L/JMJD6/ALAS1/LRRK1/SLC11A2/LILRB1/PTPN6/CEBPB/PTBP3/FLI1/SH2B3/FBXW7/ARID4A/CITED2/PIP4K2A	22
BP	GO:0050672	negative regulation of lymphocyte proliferation	22/1285	87/18903	5.43e-08	9.52e-07	6.27e-07	HLA-DRB1/TYROBP/HAVCR2/LST1/LILRB4/LGALS9/VSIG4/LYN/CD86/INPP5D/PELI1/PRNP/RASSF5/ATM/CD300A/BTK/LILRB1/PTPN6/CEBPB/ARG2/IL4I1/SPN	22
[truncated: 1,335 more rows]

## Sheet: Table S3.3
Table S3.3 KEGG enrichment results based on up-regulated expressed genes (Smooth Muscle Cell vs other cells) in scRNA-seq (GSE201048)
[truncated: 58 more rows]

## Sheet: Table S3.4
Table S3.4 KEGG enrichment results based on down-regulated expressed genes (Smooth Muscle Cell vs other cells) in scRNA-seq (GSE201048)
[truncated: 106 more rows]
